# Supplementary material for: Evaluation of Circulating Plasma Proteins in Breast Cancer: A Mendelian Randomization Analysis
Source: Research Square preprint supplement (doi:10.21203/rs.3.rs-2749047/v1), 2023-04-04
Supplement: Supplementary file 2 [file bba2d438c7f507bbe9cfc618.xlsx]

## Sheet: Legend
ST1	cis-pQTL identified in the KARMA study.
ST2	Mendelian randomization results for breast cancer risk factors
ST3	Protein abundance data from the peptide atlas (Human Protein Atlas) for overlapping proteins on the Olink Explore panels
ST4	Mendelian randomization results for breast cancer, using BCAC as outcome data
ST5	Proteins measured in KARMA on the Olink Explore I and II panels and % detected above limit of detection
ST6	Association between Olink proteins and clinical characteristics of the KARMA women

## Sheet: ST1
ProteinID	OlinkID	UniProt	GeneName	>1 signal	MissingFreq	Panel	assay	SNP_Chr	SNP_Pos	rsID	REF	ALT	EA	OA	A1_FREQ	OBS_CT	BETA	SE	PVAL	GeneChr	start_position	end_position	previous cis-pQTL (SNP or lead variant in high LD, r2=0.8), p<5E-08 if not given	Replicating	SomascanV4_Assay_available	previous pQTL to related protein	Bonf. Corrected replication
AGRN:O00468:OID20786	OID20786	O00468	AGRN	0	0	Inflammation	AGRN	1	882033	rs2272756	G	A	A	G	0.247241	453	-0.294238	0.0657325	9.67e-06	1	955503	991496	AGRN (Pietzner 2021, p=9.28e-5)	NA	TRUE		6.12745e-05
PARK7:Q99497:OID21160	OID21160	Q99497	PARK7	0	0	Neurology	PARK7	1	8109836	rs34823376	G	A	A	G	0.184211	570	0.391643	0.0727271	1.07e-07	1	8014351	8045565	PARK7 (Pietzner 2021)	TRUE	TRUE
CA6:P23280:OID21096	OID21096	P23280	CA6	0	0	Neurology	CA6	1	9017204	rs2274333	A	G	G	A	0.254967	453	0.393272	0.0704772	4.19e-08	1	9005926	9035151	CA6 (Pietzner 2021)	TRUE	TRUE
CLSTN1:O94985:OID20874	OID20874	O94985	CLSTN1	0	0.2258	Neurology	CLSTN1	1	9090994	rs114878963	C	T	T	C	0.0376106	452	-0.750276	0.173873	1.97e-05	1	9789084	9884584	----	FALSE	TRUE
ANGPTL7:O43827:OID21412	OID21412	O43827	ANGPTL7	0	0	Oncology	ANGPTL7	1	11128329	rs2791656	A	G	A	G	0.214286	567	-0.38488	0.0681609	2.61e-08	1	11249398	11256038	----	FALSE	TRUE
DRAXIN:Q8NBI3:OID20917	OID20917	Q8NBI3	DRAXIN	0	0	Neurology	DRAXIN	1	11774956	rs9430631	C	T	T	C	0.328947	570	0.250698	0.061321	4.98e-05	1	11751786	11785914	----	FALSE	TRUE
NTproBNP:NTproBNP:OID20125	OID20125	NTproBNP	NTproBNP	0	0.1171	Cardiometabolic	NTproBNP	1	11919271	rs198389	A	G	G	A	0.444812	453	0.278011	0.0571155	1.57e-06	1	11917521	11919002	NTproBNP (Sun, PMID: 26908625, Pietzner 2021)	TRUE	TRUE
CTRC:Q99895:OID20752	OID20752	Q99895	CTRC	0	0	Inflammation	CTRC	1	15770101	rs10803384	C	A	A	C	0.219027	452	0.306488	0.0742977	4.43e-05	1	15764935	15775737	----	FALSE	TRUE
PLA2G2A:P14555:OID20274	OID20274	P14555	PLA2G2A	0	0	Cardiometabolic	PLA2G2A	1	20293791	rs6672057	T	C	C	T	0.47807	570	-0.320152	0.0573303	3.66e-08	1	20301925	20306932	PLA2G2A (Pietzner 2021)	TRUE	TRUE
CDA:P32320:OID30345	OID30345	P32320	CDA	0	0	Cardiometabolic_II	CDA	1	20915701	rs2072671	A	C	C	A	0.330022	453	-0.38044	0.0675443	3.16e-08	1	20915441	20945401	----	NA	FALSE
HSPG2:P98160:OID20383	OID20383	P98160	HSPG2	0	0	Cardiometabolic	HSPG2	1	21911240	rs113007157	G	C	C	G	0.0390071	564	-0.51961	0.128479	5.99e-05	1	22148738	22263790	----	FALSE	TRUE
CELA3A:P09093:OID20298	OID20298	P09093	CELA3A	0	0	Cardiometabolic	CELA3A	1	22310145	rs10733032	C	T	C	T	0.0376106	452	-0.703532	0.165052	2.47e-05	1	22328149	22339032	----	NA	FALSE
C1QA:P02745:OID20654	OID20654	P02745	C1QA	0	0	Inflammation	C1QA	1	22945619	rs158772	A	G	G	A	0.0730634	568	-0.631346	0.109748	1.45e-08	1	22962999	22966101	Complement C1q subcomponent (C1q) (Pietzner 2021, p=0.0175)	NA	TRUE	C1QC (Pietzner 2021)
PAFAH2:Q99487:OID31286	OID31286	Q99487	PAFAH2	0	0.5301	Oncology_II	PAFAH2	1	26743903	rs6683792	C	T	T	C	0.311258	453	-0.292689	0.0718777	5.52e-05	1	26286258	26324648	----	FALSE	TRUE
CD164L2:Q6UWJ8:OID30922	OID30922	Q6UWJ8	CD164L2	0	0.607	Neurology_II	CD164L2	1	27800367	rs9438574	A	G	G	A	0.101754	570	0.797177	0.0906044	1.71e-17	1	27705666	27709870	----	FALSE	TRUE
ATP5IF1:Q9UII2:OID20760	OID20760	Q9UII2	ATP5IF1	0	0	Inflammation	ATP5IF1	1	28572317	rs12129745	G	C	C	G	0.292035	452	0.291945	0.074201	9.68e-05	1	28562620	28573417	----	NA	FALSE
PTPRF:P10586:OID20310	OID20310	P10586	PTPRF	0	0	Cardiometabolic	PTPRF	1	44537581	rs56204257	C	T	T	C	0.0194346	566	-0.966827	0.199529	1.64e-06	1	43990858	44089343	----	NA	FALSE
UROD:P06132:OID30603	OID30603	P06132	UROD	0	0	Inflammation_II	UROD	1	45463500	rs7525733	T	G	G	T	0.274648	568	-0.324246	0.0661757	1.26e-06	1	45477819	45481247	UROD (Pietzner 2021)	TRUE	TRUE
C8B:P07358:OID30719	OID30719	P07358	C8B	0	0.0134	Inflammation_II	C8B	1	57395421	rs653804	C	G	G	C	0.294248	452	0.495232	0.0647057	1.23e-13	1	57394883	57431813	Complement component C8 (Pietzner 2021, p=3.03E-07)	NA	TRUE	C8G (Pietzner 2021)
ANGPTL3:Q9Y5C1:OID20407	OID20407	Q9Y5C1	ANGPTL3	0	0	Cardiometabolic	ANGPTL3	1	62903547	rs9436223	C	T	T	C	0.328947	570	-0.291442	0.0564149	3.33e-07	1	63063158	63071830	ANGPTL3 (Pietzner 2021)	TRUE	TRUE
ROR1:Q01973:OID20224	OID20224	Q01973	ROR1	0	0	Cardiometabolic	ROR1	1	64614011	rs6588083	T	C	C	T	0.178808	453	-0.550883	0.0795382	1.53e-11	1	64239693	64647181	ROR1 (Pietzner 2021)	TRUE	TRUE
CTBS:Q01459:OID30710	OID30710	Q01459	CTBS	1	0	Inflammation_II	CTBS	1	84751810	rs11163937	A	T	T	A	0.371111	450	0.290956	0.0670093	1.75e-05	1	85015289	85040163	----	NA	FALSE
CTBS:Q01459:OID30710	OID30710	Q01459	CTBS	0	0	Inflammation_II	CTBS	1	85075487	rs2943664	T	C	C	T	0.0333333	450	1.15707	0.168496	2.24e-11	1	85015289	85040163	----	NA	FALSE
DDAH1:O94760:OID21299	OID21299	O94760	DDAH1	0	0	Oncology	DDAH1	1	85805355	rs233068	G	A	A	G	0.415011	453	-0.27186	0.0663192	4.93e-05	1	85784164	86043933	----	FALSE	TRUE
GBP4:Q96PP9:OID20845	OID20845	Q96PP9	GBP4	0	0.6923	Neurology	GBP4	1	89522512	rs4376712	C	T	C	T	0.511038	453	0.406765	0.0658231	1.46e-09	1	89646831	89664615	----	NA	TRUE	GBP1 (Pietzner 2021)
EVI5:O60447:OID30519	OID30519	O60447	EVI5	0	0.1555	Inflammation_II	EVI5	1	93082372	rs34231012	C	T	T	C	0.212014	566	-0.333845	0.0711329	3.39e-06	1	92974253	93257961	----	NA	FALSE
AMY2A:P04746:OID20333	OID20333	P04746	AMY2A	0	0	Cardiometabolic	AMY2A	1	104067608	rs28558115	C	T	T	C	0.0431416	452	0.633243	0.153498	4.42e-05	1	104159999	104168402	AMY2B (Pietzner 2021)	TRUE	TRUE
CELSR2:Q9HCU4:OID30593	OID30593	Q9HCU4	CELSR2	0	0	Inflammation_II	CELSR2	1	109818306	rs629301	G	T	G	T	0.218421	570	0.525871	0.0687795	9.07e-14	1	109792641	109818372	----	NA	FALSE
AMIGO1:Q86WK6:OID30881	OID30881	Q86WK6	AMIGO1	0	0.6739	Neurology_II	AMIGO1	1	110846986	rs652295	A	G	A	G	0.274336	452	0.320011	0.0754381	2.7e-05	1	110046797	110052360	----	FALSE	TRUE
CD101:Q93033:OID31480	OID31480	Q93033	CD101	0	0	Oncology_II	CD101	1	117516341	rs7530629	A	G	G	A	0.0918142	452	-0.539792	0.113746	2.81e-06	1	117544382	117579167	----	NA	FALSE
CD160:O95971:OID20647	OID20647	O95971	CD160	0	0	Inflammation	CD160	1	145676266	rs10910840	A	G	G	A	0.422737	453	-0.328902	0.0639077	3.99e-07	1	145695798	145715614	CD160 (Pietzner 2021 p =2.59e-5)	TRUE	TRUE
ACP6:Q9NPH0:OID21432	OID21432	Q9NPH0	ACP6	0	0	Oncology	ACP6	1	147124960	rs28700004	G	C	C	G	0.272647	563	-0.875463	0.0538076	6.12e-49	1	147101453	147142618	ACP6 (Pietzner 2021)	TRUE	TRUE
ECM1:Q16610:OID30736	OID30736	Q16610	ECM1	0	0	Inflammation_II	ECM1	1	150410978	rs7538981	G	A	A	G	0.370796	565	-0.713329	0.0519588	3.81e-37	1	150480538	150486265	ECM1 (Pietzner 2021)	TRUE	TRUE
CA14:Q9ULX7:OID21401	OID21401	Q9ULX7	CA14	0	0	Oncology	CA14	1	150486988	rs72698892	G	A	A	G	0.0643016	451	0.530322	0.127589	3.88e-05	1	150229554	150237478	----	NA	FALSE
TDRKH:Q9Y2W6:OID20875	OID20875	Q9Y2W6	TDRKH	0	0.0468	Neurology	TDRKH	1	151013500	rs6703620	A	T	T	A	0.507726	453	-0.296212	0.0745427	8.26e-05	1	151742583	151763892	----	NA	FALSE
CRNN:Q9UBG3:OID21427	OID21427	Q9UBG3	CRNN	0	0	Oncology	CRNN	1	152414562	rs4845434	A	G	A	G	0.20354	452	0.382394	0.0785122	1.55e-06	1	152381719	152386739	CRNN (Pietzner 2021)	TRUE	TRUE
SPRR3:Q9UBC9:OID31131	OID31131	Q9UBC9	SPRR3	0	0	Neurology_II	SPRR3	1	152959266	rs11205150	C	T	C	T	0.464444	450	-0.329298	0.0648741	5.7e-07	1	152974223	152976332	----	NA	FALSE
LELP1:Q5T871:OID30845	OID30845	Q5T871	LELP1	0	0.7475	Neurology_II	LELP1	1	153121274	rs12724705	C	T	T	C	0.446903	452	0.294979	0.0719227	4.89e-05	1	153175919	153177596	----	NA	FALSE
S100A4:P26447:OID21519	OID21519	P26447	S100A4	0	0	Oncology	S100A4	1	153496247	rs7518306	G	A	G	A	0.0844444	450	0.761815	0.117525	2.43e-10	1	153516089	153522612	S100A4 (Pietzner 2021, p=0.0015)	FALSE	TRUE	S100A7, S100A2 (Pietzner 2021)
IL6R:P08887:OID20385	OID20385	P08887	IL6R	0	0	Cardiometabolic	IL6R	1	154418749	rs4576655	C	T	T	C	0.411404	570	1.04127	0.0399098	7.38e-99	1	154377669	154441926	IL6R (PMID:33067605, Pitzner 2021)	TRUE	TRUE
ADAM15:Q13444:OID20109	OID20109	Q13444	ADAM15	0	0	Cardiometabolic	ADAM15	1	155026942	rs6427128	A	C	A	C	0.112583	453	0.822923	0.10016	2.32e-15	1	155023042	155035252	----	FALSE	TRUE
GBA:P04062:OID30966	OID30966	P04062	GBA1	0	0.592	Neurology_II	GBA	1	155043436	rs4845712	G	C	G	C	0.398004	451	-0.289787	0.06795	2.45e-05	1	155204243	155214490	----	NA	FALSE
EFNA1:P20827:OID21125	OID21125	P20827	EFNA1	0	0	Neurology	EFNA1	1	155127749	rs7535292	T	C	C	T	0.494671	563	-0.358509	0.0527739	2.84e-11	1	155099936	155107333	EFNA1 (Pietzner 2021, p=0.0330)	FALSE	TRUE
HDGF:P51858:OID21455	OID21455	P51858	HDGF	0	0	Oncology	HDGF	1	156704613	rs61813557	G	A	A	G	0.323529	561	1.0109	0.0473407	3.35e-74	1	156711899	156736717	HDGF (Emilson, 2018, Pietzner 2021)	TRUE	TRUE
FCRL5:Q96RD9:OID21111	OID21111	Q96RD9	FCRL5	0	0	Neurology	FCRL5	1	157508660	rs2012425	A	G	A	G	0.114444	450	0.423863	0.10348	5e-05	1	157483167	157522310	FCRL5 (Pietzner 2021, p=0.0178)	FALSE	TRUE
FCRL3:Q96P31:OID20443	OID20443	Q96P31	FCRL3	0	0.2241	Inflammation	FCRL3	1	157668993	rs2210913	C	T	T	C	0.44386	570	0.899204	0.0456676	5.24e-66	1	157644111	157670647	FCRL3 (Emilsson 2018, ..Pietzner 2021)	TRUE	TRUE
FCRL2:Q96LA5:OID20639	OID20639	Q96LA5	FCRL2	0	0	Inflammation	FCRL2	1	157736098	rs112537702	A	G	G	A	0.131295	278	0.87054	0.118494	2.43e-12	1	157715523	157746922	FCRL2 (PMID: 31320639)	TRUE	TRUE
FCRL1:Q96LA6:OID20172	OID20172	Q96LA6	FCRL1	0	0	Cardiometabolic	FCRL1	1	157737504	rs2873413	G	A	A	G	0.479029	453	0.350644	0.0622138	3.1e-08	1	157764193	157789895	FCRL1 (Pietzner 2021)	TRUE	TRUE
CD5L:O43866:OID30775	OID30775	O43866	CD5L	0	0	Inflammation_II	CD5L	1	157804648	rs2765501	G	A	A	G	0.423684	570	0.261778	0.0601854	1.62e-05	1	157800704	157868046	CD5L (PMID: 30111768, Pietzner 2021)	TRUE	TRUE
APCS:P02743:OID30778	OID30778	P02743	APCS	0	0	Inflammation_II	APCS	1	159064568	rs2814764	A	T	A	T	0.321869	567	-0.318331	0.0692034	5.23e-06	1	159557615	159558655	----	FALSE	TRUE
FCRL6:Q6DN72:OID20529	OID20529	Q6DN72	FCRL6	0	0	Inflammation	FCRL6	1	159783559	rs58240276	C	T	T	C	0.18617	564	-0.644295	0.0692745	3.19e-19	1	159770301	159786041	FCRL6 (Sun, Pietzner)	TRUE	TRUE
CD48:P09326:OID20692	OID20692	P09326	CD48	0	0	Inflammation	CD48	1	160674620	rs9628658	A	G	G	A	0.108647	451	-0.866072	0.101861	2.88e-16	1	160648536	160681641	CD48 (Pietzner 2021)	TRUE	TRUE
SLAMF7:Q9NQ25:OID20602	OID20602	Q9NQ25	SLAMF7	0	0	Inflammation	SLAMF7	1	160711804	rs35967351	A	T	T	A	0.322616	451	-0.311067	0.0699974	1.12e-05	1	160709037	160724611	SLAMF7 (Sun, Pietzner 2021)	TRUE	TRUE
LY9:Q9HBG7:OID20670	OID20670	Q9HBG7	LY9	0	0	Inflammation	LY9	1	160771197	rs474918	C	T	C	T	0.225664	452	0.648615	0.0739969	4.01e-17	1	160765864	160798051	LY9 (Pietzner 2021)	TRUE	TRUE
CD244:Q9BZW8:OID20628	OID20628	Q9BZW8	CD244	0	0	Inflammation	CD244	1	160815170	rs491061	A	G	G	A	0.441372	452	0.267067	0.0645066	4.16e-05	1	160799950	160832692	CD244 (Pietzner 2021, p=3.29e-4)	FALSE	TRUE
FCGR2A:P12318:OID20391	OID20391	P12318	FCGR2A	1	0	Cardiometabolic	FCGR2A	1	161477816	rs7518087	C	T	T	C	0.0829646	452	-1.25401	0.102653	8.85e-30	1	161475220	161493803	FCGR2A (Pietzner 2021)	TRUE	TRUE
FCGR2B:P31994:OID21215	OID21215	P31994	FCGR2B	0	0.087	Oncology	FCGR2B	1	161479745	rs1801274	A	G	A	G	0.469095	453	0.356219	0.0647612	6.41e-08	1	161551101	161648444	FCGR2B (Pietzner 2021); FCGR2B CSF (PMID: 28031287)	TRUE	TRUE
FCGR3B:O75015:OID20387	OID20387	O75015	FCGR3B	0	0	Cardiometabolic	FCGR3B	1	161659845	rs7539053	T	C	T	C	0.246137	453	-0.65862	0.0701566	3.21e-19	1	161592986	161601753	FCGR3B (Pietzner 2021)	TRUE	TRUE
FCRLB:Q6BAA4:OID21193	OID21193	Q6BAA4	FCRLB	0	0.0067	Oncology	FCRLB	1	161678182	rs12040409	T	G	G	T	0.0342105	570	1.28979	0.148461	4.05e-17	1	161691353	161697933	FCRLB (Pietzner 2021)	TRUE	TRUE
FCGR2A:P12318:OID20391	OID20391	P12318	FCGR2A	0	0	Cardiometabolic	FCGR2A	1	161914283	rs10800151	A	G	G	A	0.423841	453	-0.269184	0.0668862	6.71e-05	1	161475220	161493803	FCGR2A (Pietzner 2021, p=8.54e-4)	FALSE	TRUE	FCGR2B (Pietzner 2021)
XCL1:P47992:OID21398	OID21398	P47992	XCL1	0	0	Oncology	XCL1	1	168521615	rs12049040	G	A	A	G	0.199123	570	0.912129	0.0605381	2.52e-43	1	168545711	168551315	XCL1 (Sun 2018)	TRUE	TRUE
DPT:Q07507:OID20278	OID20278	Q07507	DPT	0	0	Cardiometabolic	DPT	1	168721577	rs10918972	T	C	T	C	0.253863	453	-0.412791	0.0585599	6.93e-12	1	168664697	168698502	DPT (Pietzner 2021)	TRUE	TRUE
SELL:P14151:OID30752	OID30752	P14151	SELL	0	0	Inflammation_II	SELL	1	169708386	rs12084893	A	G	G	A	0.257951	566	-0.351891	0.0644485	7.18e-08	1	169659808	169680839	SELL (Pietzner 2021)	TRUE	TRUE
MYOC:Q99972:OID21121	OID21121	Q99972	MYOC	0	0	Neurology	MYOC	1	171655929	rs12095624	G	A	A	G	0.119205	453	-0.445646	0.0920561	1.79e-06	1	171604557	171621823	MYOC (Pietzner 2021)	TRUE	TRUE
PRDX6:P30041:OID21404	OID21404	P30041	PRDX6	0	0	Oncology	PRDX6	1	173588081	rs6674589	C	A	A	C	0.203375	563	0.342949	0.070953	1.74e-06	1	173446405	173457946	----	FALSE	TRUE
RABGAP1L:Q5R372:OID20447	OID20447	Q5R372	RABGAP1L	0	0.0251	Inflammation	RABGAP1L	1	174533614	rs56347239	G	A	A	G	0.418134	568	0.268221	0.0596868	8.51e-06	1	174128548	174964445	----	NA	FALSE
TNN:Q9UQP3:OID30412	OID30412	Q9UQP3	TNN	0	0	Cardiometabolic_II	TNN	1	175094820	rs2861155	T	C	T	C	0.348115	451	0.897706	0.0552311	6.59e-47	1	175036994	175117202	----	NA	FALSE
TNR:Q92752:OID20957	OID20957	Q92752	TNR	0	0	Neurology	TNR	1	175593535	rs4354507	C	T	T	C	0.416667	564	-0.303201	0.0577523	2.17e-07	1	175284330	175712906	TNR (Pietzner 2021)	TRUE	TRUE
ANGPTL1:O95841:OID20211	OID20211	O95841	ANGPTL1	0	0	Cardiometabolic	ANGPTL1	1	178604633	rs2093770	C	A	A	C	0.376761	568	0.323979	0.0585983	4.95e-08	1	178818840	178840187	ANGPTL1 (Pietzner 2021)	TRUE	TRUE
TOR1AIP1:Q5JTV8:OID30195	OID30195	Q5JTV8	TOR1AIP1	0	0.0351	Cardiometabolic_II	TOR1AIP1	1	179862616	rs6680290	C	T	T	C	0.312362	453	-0.397379	0.0726741	7.61e-08	1	179851177	179894135	----	FALSE	TRUE
QSOX1:O00391:OID30729	OID30729	O00391	QSOX1	0	0.0017	Inflammation_II	QSOX1	1	180145609	rs12126202	A	C	A	C	0.22134	567	-0.33788	0.0677318	8.14e-07	1	180123969	180173165	----	NA	FALSE
CFHR5:Q9BXR6:OID30716	OID30716	Q9BXR6	CFHR5	0	0	Inflammation_II	CFHR5	1	196634467	rs28688002	T	A	A	T	0.227373	453	-0.449469	0.0782711	1.73e-08	1	196946667	196978804	CFHR5 (Pietzner 2021)	TRUE	TRUE
CFHR2:P36980:OID30720	OID30720	P36980	CFHR2	0	0.0033	Inflammation_II	CFHR2	1	196635106	rs529825	G	A	A	G	0.235035	568	-0.893768	0.0581639	1.05e-44	1	196788898	196928356	CFHR2 (Pietzner 2021)	TRUE	TRUE
CFH:P08603:OID30790	OID30790	P08603	CFH	0	0	Inflammation_II	CFH	1	196679682	rs35617250	C	T	T	C	0.186842	570	0.364839	0.0655127	3.98e-08	1	196621008	196716634	CFH (Pietzner 2021)	TRUE	TRUE
CFHR4:Q92496:OID30758	OID30758	Q92496	CFHR4	0	0.0017	Inflammation_II	CFHR4	1	196944357	rs10801582	G	A	A	G	0.215556	450	-0.879205	0.0698617	3.03e-31	1	196819371	196888102	CFHR4 (Pietzner 2021)	TRUE	TRUE
F13B:P05160:OID30781	OID30781	P05160	F13B	0	0	Inflammation_II	F13B	1	197001099	rs12075161	T	A	A	T	0.13933	567	-0.468057	0.0809806	1.24e-08	1	197008321	197036397	F13B (PMID: 23381943, Pietzner 2021)	TRUE	TRUE
LMOD1:P29536:OID30212	OID30547	P29536	LMOD1	0	0	Inflammation_II	LMOD1	1	202022255	rs113146684	T	G	G	T	0.0365854	451	0.603974	0.151742	8.05e-05	1	201865580	201915715	----	FALSE	TRUE
CHI3L1:P36222:OID20399	OID20399	P36222	CHI3L1	0	0	Cardiometabolic	CHI3L1	1	203156080	rs10399931	T	C	T	C	0.223684	570	-0.289874	0.0650687	1.01e-05	1	203148059	203155877	CHI3L1 (Pietzner 2021)	TRUE	TRUE
CHIT1:Q13231:OID20312	OID20312	Q13231	CHIT1	0	0.0084	Cardiometabolic	CHIT1	1	203184766	rs872583	T	C	C	T	0.208705	448	-0.962593	0.0681299	1.26e-37	1	203181955	203242769	CHIT1 (Sun, Emilsson, Pitzner 2021)	TRUE	TRUE
PRELP:P51888:OID20766	OID20766	P51888	PRELP	0	0	Inflammation	PRELP	1	203371175	rs12068940	T	C	C	T	0.113357	569	-0.320904	0.0779538	4.42e-05	1	203444956	203460480	----	NA	FALSE
NFASC:O94856:OID20634	OID20634	O94856	NFASC	1	0.0234	Inflammation	NFASC	1	204798934	rs55846489	T	G	G	T	0.123333	450	0.503564	0.0928664	9.7e-08	1	204797779	204991950	NFASC (Pietzner 2021)	TRUE	TRUE
NFASC:O94856:OID20634	OID20634	O94856	NFASC	0	0.0234	Inflammation	NFASC	1	204945489	rs6693024	C	A	A	C	0.0916115	453	0.659423	0.103479	4.66e-10	1	204797779	204991950	NFASC (Pietzner 2021)	TRUE	TRUE
CNTN2:Q02246:OID21426	OID21426	Q02246	CNTN2	1	0	Oncology	CNTN2	1	205012198	rs2071533	T	G	T	G	0.140177	453	1.03709	0.0790609	1.88e-33	1	205012325	205047627	CNTN2 (PMID:30072576, Pietzner 2021)	TRUE	TRUE
CNTN2:Q02246:OID21426	OID21426	Q02246	CNTN2	0	0	Oncology	CNTN2	1	205090433	rs1339321	G	A	A	G	0.179912	453	-0.387093	0.0817964	2.99e-06	1	205012325	205047627	CNTN2 (Pietzner 2021)	TRUE	TRUE
PM20D1:Q6GTS8:OID20149	OID20149	Q6GTS8	PM20D1	0	0.0786	Cardiometabolic	PM20D1	1	205774839	rs823074	T	C	C	T	0.433099	568	-0.268709	0.0571517	3.25e-06	1	205797150	205819260	----	NA	FALSE
CTSE:P14091:OID30628	OID30628	P14091	CTSE	0	0	Inflammation_II	CTSE	1	206326498	rs28410805	A	G	G	A	0.1766	453	-0.633528	0.0790673	1e-14	1	206317459	206332104	CTSE (Pietzner 2021)	TRUE	TRUE
FCAMR:Q8WWV6:OID30332	OID30332	Q8WWV6	FCAMR	0	0	Cardiometabolic_II	FCAMR	1	207137129	rs11588068	G	A	A	G	0.210817	453	0.489642	0.0718825	3.15e-11	1	207131310	207143970	----	FALSE	TRUE
PFKFB2:O60825:OID21356	OID21356	O60825	PFKFB2	0	0	Oncology	PFKFB2	1	207250456	rs1060287	C	T	T	C	0.47807	570	-0.26859	0.0569405	3.02e-06	1	207222801	207254369	PFKFB2 (Pietzner 2021)	NA	TRUE
CD55:P08174:OID20377	OID20377	P08174	CD55	0	0	Cardiometabolic	CD55	1	207505274	rs28371614	C	T	T	C	0.277042	453	-0.378913	0.0646224	8.86e-09	1	207494853	207534311	CD55 (Pietzner 2021)	TRUE	TRUE
CR1:P17927:OID30697	OID30697	P17927	CR1	0	0	Inflammation_II	CR1	1	207784968	rs3818361	A	G	A	G	0.18543	453	0.530266	0.0762018	1.24e-11	1	207669492	207813992	CR1 (Pietzner 2021)	TRUE	TRUE
SUSD4:Q5VX71:OID31398	OID31398	Q5VX71	SUSD4	0	0.01	Oncology_II	SUSD4	1	223439518	rs61837629	T	C	C	T	0.433775	453	-0.36147	0.0650143	4.67e-08	1	223394161	223537544	----	NA	FALSE
LEFTY2:O00292:OID21454	OID21454	O00292	LEFTY2	1	0	Oncology	LEFTY2	1	225837690	rs12039453	C	T	T	C	0.0586283	452	-0.549074	0.135325	5.86e-05	1	226124298	226129189	----	FALSE	TRUE
LEFTY2:O00292:OID21454	OID21454	O00292	LEFTY2	0	0	Oncology	LEFTY2	1	226076919	rs360058	G	T	T	G	0.389625	453	-0.782626	0.0555322	1.53e-37	1	226124298	226129189	LEFTY2 (Pietzner 2021)	TRUE	TRUE
LBR:Q14739:OID21034	OID21034	Q14739	LBR	0	0	Neurology	LBR	1	226082061	rs12122104	G	A	A	G	0.0369718	568	0.617382	0.15413	7.02e-05	1	225589204	225616627	----	NA	FALSE
GALNT2:Q10471:OID21423	OID21423	Q10471	GALNT2	0	0	Oncology	GALNT2	1	230295245	rs12065546	C	T	C	T	0.131696	448	-0.561183	0.0927436	3.09e-09	1	230193536	230417870	----	FALSE	TRUE
AGT:P01019:OID30709	OID30709	P01019	AGT	0	0	Inflammation_II	AGT	1	230845977	rs4762	G	A	A	G	0.132456	570	1.02895	0.0779911	8.29e-35	1	230838269	230850043	AGT (PMID: 27329291), (AGT, Pietzner 2021, p = 5.14e-4)	FALSE	TRUE
LGALS8:O00214:OID21041	OID21041	O00214	LGALS8	0	0	Neurology	LGALS8	1	236739416	rs2115740	C	T	C	T	0.26773	564	-0.506752	0.0607313	5.71e-16	1	236681300	236716281	LGALS8 (Pietzner 2021)	TRUE	TRUE
LYPD8:Q6UX82:OID21251	OID21251	Q6UX82	LYPD8	0	0.4231	Oncology	LYPD8	1	249094128	rs4512688	T	C	C	T	0.103104	451	0.444559	0.107228	4.06e-05	1	248902716	248903170	----	NA	FALSE
ACP1:P24666:OID30524	OID30524	P24666	ACP1	0	0.2107	Inflammation_II	ACP1	2	220889	rs3828165	G	A	A	G	0.380282	568	-0.374922	0.0578952	2.07e-10	2	264140	278283	ACP1 (Pietzner 2021)	TRUE	TRUE
VSNL1:P62760:OID31105	OID31105	P62760	VSNL1	0	0	Neurology_II	VSNL1	2	17762452	rs1401634	A	G	G	A	0.309735	452	0.378756	0.0699323	1e-07	2	17720393	17838285	----	FALSE	TRUE
MATN3:O15232:OID20979	OID20979	O15232	MATN3	1	0	Neurology	MATN3	2	20207619	rs11694716	G	A	G	A	0.373894	452	0.642239	0.0621953	1.53e-22	2	20191872	20212455	MATN3 (Pietzner 2021)	TRUE	TRUE
MATN3:O15232:OID20979	OID20979	O15232	MATN3	0	0	Neurology	MATN3	2	20617451	rs12471220	T	C	C	T	0.140177	453	-0.476734	0.108697	1.44e-05	2	20191872	20212455	MATN3 (Pietzner 2021, p=0.0040)	FALSE	TRUE
TP53I3:Q53FA7:OID30632	OID30632	Q53FA7	TP53I3	0	0	Inflammation_II	TP53I3	2	24342532	rs1134516	G	A	A	G	0.144112	569	-0.573541	0.0796221	1.91e-12	2	24300303	24308731	TP53I3 (Pietzner 2021)	TRUE	TRUE
KHK:P50053:OID30241	OID30241	P50053	KHK	0	0	Cardiometabolic_II	KHK	2	27259794	rs13021112	G	A	G	A	0.374561	570	-0.309253	0.0577662	1.26e-07	2	27309615	27323640	----	NA	FALSE
ATRAID:Q6UW56:OID31451	OID31451	Q6UW56	ATRAID	0	0	Oncology_II	ATRAID	2	27435374	rs11608	G	A	G	A	0.304577	568	0.293764	0.0595428	1.07e-06	2	27434895	27440046	----	NA	FALSE
CRIM1:Q9NZV1:OID20701	OID20701	Q9NZV1	CRIM1	1	0	Inflammation	CRIM1	2	35826179	rs75016869	A	G	G	A	0.0888889	450	-0.496253	0.107908	5.56e-06	2	36583069	36778278	----	FALSE	TRUE
CRIM1:Q9NZV1:OID20701	OID20701	Q9NZV1	CRIM1	0	0	Inflammation	CRIM1	2	35950014	rs6738737	G	C	C	G	0.158537	451	0.378825	0.0857576	1.26e-05	2	36583069	36778278	----	FALSE	TRUE
VIT:Q6UXI7:OID30334	OID30334	Q6UXI7	VIT	1	0.0017	Cardiometabolic_II	VIT	2	36902138	rs7590589	T	A	T	A	0.441501	453	-0.282624	0.062541	7.98e-06	2	36923833	37041935	VIT (Pietzner 2021)	TRUE	TRUE
VIT:Q6UXI7:OID30334	OID30334	Q6UXI7	VIT	0	0.0017	Cardiometabolic_II	VIT	2	36995489	rs1966428	C	T	C	T	0.399336	452	0.440921	0.0587602	3.43e-13	2	36923833	37041935	VIT (Pietzner 2021)	TRUE	TRUE
QPCT:Q16769:OID20320	OID20320	Q16769	QPCT	0	0	Cardiometabolic	QPCT	2	37491666	rs2300891	G	C	C	G	0.0202822	567	-0.819157	0.204604	7.08e-05	2	37571717	37600465	QPCT (Pietzner 2021)	TRUE	TRUE
MCFD2:Q8NI22:OID20171	OID20171	Q8NI22	MCFD2	0	0	Cardiometabolic	MCFD2	2	47188177	rs4953438	A	T	A	T	0.28081	568	0.308532	0.0624822	1.04e-06	2	47129009	47168994	----	NA	FALSE
EFEMP1:Q12805:OID20414	OID20414	Q12805	EFEMP1	0	0	Cardiometabolic	EFEMP1	2	56076834	rs11125606	T	C	C	T	0.234099	566	0.246863	0.0555252	1.06e-05	2	56093102	56151274	EFEMP1 (Pietzner 2021)	TRUE	TRUE
MDH1:P40925:OID30669	OID30669	P40925	MDH1	0	0	Inflammation_II	MDH1	2	64134861	rs2160799	A	T	T	A	0.411308	451	0.276087	0.066526	3.99e-05	2	63815743	63834331	MDH1 (Pietzner 2021, p=0.0015)	FALSE	TRUE
NAGK:Q9UJ70:OID30271	OID30271	Q9UJ70	NAGK	0	0	Cardiometabolic_II	NAGK	2	71314124	rs190266459	G	A	A	G	0.0254833	569	-0.867935	0.185454	3.6e-06	2	71291474	71306935	----	FALSE	TRUE
REG3G:Q6UW15:OID31408	OID31408	Q6UW15	REG3G	0	0.0903	Oncology_II	REG3G	2	79307080	rs2117724	T	C	T	C	0.286467	569	0.338433	0.0641657	1.91e-07	2	79252812	79255631	REG3G (Pietzner 2021)	TRUE	TRUE
VAMP8:Q9BV40:OID30555	OID30555	Q9BV40	VAMP8	0	0	Inflammation_II	VAMP8	2	84929257	rs11889854	G	A	A	G	0.112676	568	0.361071	0.0920706	9.89e-05	2	85788685	85809154	----	FALSE	TRUE
TMSB10:P63313:OID21118	OID21118	P63313	TMSB10	0	0	Neurology	TMSB10	2	85090434	rs80349154	T	C	C	T	0.0750552	453	0.506923	0.120065	2.94e-05	2	85132749	85133795	----	NA	FALSE
TGOLN2:O43493:OID30691	OID30691	O43493	TGOLN2	0	0	Inflammation_II	TGOLN2	2	85546192	rs1053560	C	T	C	T	0.476316	570	0.60607	0.0533975	5.08e-27	2	85545147	85555548	----	NA	FALSE
CAPG:P40121:OID21431	OID21431	P40121	CAPG	0	0	Oncology	CAPG	2	85622059	rs6886	T	C	T	C	0.205467	567	-0.551046	0.073858	3.31e-13	2	85621871	85645555	CAPG (Pietzner 2021)	TRUE	TRUE
GNLY:P22749:OID21132	OID21132	P22749	GNLY	0	0	Neurology	GNLY	2	85935182	rs7603438	A	G	G	A	0.238596	570	0.76513	0.0588173	5.33e-34	2	85912298	85925977	GNLY (Emilsson, Pietzner 2021)	TRUE	TRUE
CD8A:P01732:OID21018	OID21018	P01732	CD8A	0	0	Neurology	CD8A	2	87021001	rs4366909	G	A	A	G	0.144592	453	0.667849	0.0919153	1.68e-12	2	87011729	87035519	CD8A (Pietzner 2021)	TRUE	TRUE
IL1R2:P27930:OID20757	OID20757	P27930	IL1R2	0	0	Inflammation	IL1R2	2	102624226	rs3218848	G	A	A	G	0.405263	570	-0.463547	0.0588262	1.71e-14	2	102608306	102645006	IL1R2 (Pietzner 2021)	TRUE	TRUE
IL1R1:P14778:OID21116	OID21116	P14778	IL1R1	0	0	Neurology	IL1R1	2	102740231	rs12712131	G	C	C	G	0.273731	453	-0.296944	0.0709233	3.41e-05	2	102681004	102796334	IL1R1 (Pietzner 2021)	TRUE	TRUE
IL1RL2:Q9HB29:OID20487	OID20487	Q9HB29	IL1RL2	0	0	Inflammation	IL1RL2	2	102819049	rs1922302	T	G	T	G	0.370575	452	0.442705	0.0656901	4.97e-11	2	102803433	102856462	IL1RL2 (Pietzner 2021)	TRUE	TRUE
IL1RL1:Q01638:OID20250	OID20250	Q01638	IL1RL1	0	0	Cardiometabolic	IL1RL1	2	102977537	rs6710885	A	G	G	A	0.396896	451	-0.450744	0.0623264	2.11e-12	2	102927962	102968497	IL1RL1 (Pietzner 2021)	TRUE	TRUE
IL18R1:Q13478:OID20652	OID20652	Q13478	IL18R1	0	0	Inflammation	IL18R1	2	102981644	rs6727306	A	C	A	C	0.267699	452	0.799332	0.0624577	3.94e-32	2	102927989	103015218	IL18R1 (Pietzner 2021)	TRUE	TRUE
MERTK:Q12866:OID20657	OID20657	Q12866	MERTK	0	0	Inflammation	MERTK	2	112772465	rs6709662	T	C	T	C	0.313466	453	0.339205	0.0658222	3.86e-07	2	112656056	112787138	----	NA	FALSE
DPP10:Q8N608:OID20527	OID20527	Q8N608	DPP10	0	0	Inflammation	DPP10	2	115932634	rs10195710	G	A	A	G	0.481236	453	-0.303853	0.0664885	6.33e-06	2	115199876	116603328	----	FALSE	TRUE
INHBB:P09529:OID30625	OID30625	P09529	INHBB	0	0	Inflammation_II	INHBB	2	121317337	rs58884021	T	G	G	T	0.350352	568	-0.312579	0.0597115	2.34e-07	2	121103719	121109384	INHBB (Pietzner 2021)	TRUE	TRUE
HNMT:P50135:OID20975	OID20975	P50135	HNMT	0	0	Neurology	HNMT	2	138759649	rs11558538	C	T	T	C	0.108168	453	-0.815239	0.0894462	2.74e-18	2	138721590	138773930	----	NA	FALSE
KYNU:Q16719:OID20669	OID20669	Q16719	KYNU	0	0	Inflammation	KYNU	2	143771655	rs13025176	C	G	G	C	0.0853873	568	0.444838	0.101241	1.33e-05	2	143635067	143799890	KYNU (Pitzner 2021)	TRUE	TRUE
NMI:Q13287:OID31378	OID31378	Q13287	NMI	0	0.0301	Oncology_II	NMI	2	152158424	rs10210155	A	G	G	A	0.497354	567	-0.526354	0.0534537	3.35e-21	2	152126979	152146571	NMI (Pietzner 2021, p=3.40e-5)	TRUE	TRUE
LY75:O60449:OID20580	OID20580	O60449	LY75	0	0	Inflammation	LY75	2	160738509	rs66496937	A	G	A	G	0.463496	452	-0.963588	0.0479529	2.6e-64	2	160628362	160761260	LY75 (Pietzner 2021)	TRUE	TRUE
ITGB6:P18564:OID20493	OID20493	P18564	ITGB6	0	0	Inflammation	ITGB6	2	161028302	rs1471121	C	T	T	C	0.268893	569	-0.280566	0.0621214	7.67e-06	2	160956177	161128399	----	FALSE	TRUE
FAP:Q12884:OID20330	OID20330	Q12884	FAP	0	0	Cardiometabolic	FAP	2	163175656	rs11897697	A	C	C	A	0.0187638	453	1.25483	0.221554	2.66e-08	2	163027194	163101661	FAP (Pietzner 2021)	TRUE	TRUE
GALNT3:Q14435:OID20471	OID20471	Q14435	GALNT3	0	0.01	Inflammation	GALNT3	2	166701386	rs12999477	C	T	T	C	0.242077	568	-0.471697	0.0687579	1.83e-11	2	166604101	166651192	GALNT3 (Pietzner 2021, p=5.18e-6)	TRUE	TRUE
FRZB:Q92765:OID20968	OID20968	Q92765	FRZB	0	0	Neurology	FRZB	2	183698599	rs16823797	T	C	C	T	0.0675439	570	-0.920724	0.104887	2e-17	2	183698002	183731890	FRZB (Pietzner 2021)	TRUE	TRUE
ITGAV:P06756:OID21416	OID21416	P06756	ITGAV	0	0	Oncology	ITGAV	2	187656361	rs4517939	T	A	T	A	0.389135	451	0.278907	0.0609038	6.07e-06	2	187454792	187545628	----	NA	FALSE
TFPI:P10646:OID20388	OID20388	P10646	TFPI	0	0	Cardiometabolic	TFPI	2	188348670	rs3213739	T	G	T	G	0.433393	563	0.319436	0.0531256	3.31e-09	2	188328957	188430487	----	FALSE	TRUE
NRP2:O60462:OID21081	OID21081	O60462	NRP2	0	0	Neurology	NRP2	2	206041011	rs10203201	T	C	C	T	0.217439	453	0.301325	0.0718382	3.3e-05	2	206546714	206662857	NRP2 (Pietzner 2021)	TRUE	TRUE
ADAM23:O75077:OID20651	OID20651	O75077	ADAM23	0	0	Inflammation	ADAM23	2	207325855	rs1968272	T	C	T	C	0.185144	451	-0.677703	0.0786686	1.25e-16	2	207308263	207485851	ADAM23 (Pietzner 2021)	TRUE	TRUE
CRYGD:P07320:OID31144	OID31144	P07320	CRYGD	0	0	Neurology_II	CRYGD	2	208983538	rs6435414	T	A	A	T	0.477193	570	0.608612	0.0531536	2e-27	2	208986331	208989225	CRYGD (Pietzner 2021)	TRUE	TRUE
FN1:P02751:OID30787	OID30787	P02751	FN1	0	0	Inflammation_II	FN1	2	216300482	rs1250259	T	A	T	A	0.181019	569	-0.356596	0.0665641	1.24e-07	2	216225163	216300895	FN1 (Emilsson, Pietzner 2021 p = 4.66E-07)	TRUE	TRUE
SERPINE2:P07093:OID30359	OID30359	P07093	SERPINE2	0	0.0134	Cardiometabolic_II	SERPINE2	2	224890840	rs10194024	C	A	C	A	0.415743	451	0.296316	0.0650245	6.72e-06	2	224839829	224904036	----	FALSE	TRUE
B3GNT7:Q8NFL0:OID30281	OID30281	Q8NFL0	B3GNT7	0	0	Cardiometabolic_II	B3GNT7	2	232279687	rs12993290	G	A	A	G	0.247788	452	-0.552072	0.0670538	2.06e-15	2	232260254	232265875	----	NA	FALSE
LRRFIP1:Q32MZ4:OID31344	OID31344	Q32MZ4	LRRFIP1	0	0.0669	Oncology_II	LRRFIP1	2	238630553	rs1038986	T	C	C	T	0.174688	561	-0.328838	0.0753459	1.52e-05	2	238536219	238722325	----	NA	FALSE
SCLY:Q96I15:OID21425	OID21425	Q96I15	SCLY	0	0	Oncology	SCLY	2	239007260	rs368304491	G	A	G	A	0.454044	272	-0.467829	0.0815553	2.65e-08	2	238969530	239008054	----	NA	FALSE
GPC1:P35052:OID21438	OID21438	P35052	GPC1	0	0	Oncology	GPC1	2	241441625	rs6755083	C	A	A	C	0.0836299	562	0.511402	0.0987319	3.12e-07	2	241375088	241407493	GPC1 (Pietzner 2021)	TRUE	TRUE
AGXT:P21549:OID20139	OID20139	P21549	AGXT	0	0	Cardiometabolic	AGXT	2	241756477	rs7582742	C	T	T	C	0.192222	450	-0.349506	0.0822085	2.59e-05	2	241807896	241819919	----	NA	FALSE
CHL1:O00533:OID20366	OID20366	O00533	CHL1	0	0	Cardiometabolic	CHL1	3	118118	rs12633924	C	G	G	C	0.184035	451	-0.448525	0.0842437	1.62e-07	3	238279	451090	CHL1 (Pietzner 2021)	TRUE	TRUE
CNTN4:Q8IWV2:OID21117	OID21117	Q8IWV2	CNTN4	0	0	Neurology	CNTN4	3	2248474	rs73099948	G	A	A	G	0.0110375	453	1.28337	0.30708	3.52e-05	3	2140497	3099645	CNTN4 (PMID: 29875488)	TRUE	TRUE
LRRN1:Q6UXK5:OID20438	OID20438	Q6UXK5	LRRN1	0	0	Inflammation	LRRN1	3	3823602	rs711539	T	C	C	T	0.288603	272	0.690901	0.0860477	3.29e-14	3	3841121	3889387	----	FALSE	TRUE
CRELD1:Q96HD1:OID30619	OID30619	Q96HD1	CRELD1	0	0	Inflammation_II	CRELD1	3	10045703	rs6786636	T	C	C	T	0.18662	568	0.569494	0.0667506	1.36e-16	3	9975506	9987097	CRELD1 (Pietzner 2021)	TRUE	TRUE
TIMP4:Q99727:OID21147	OID21147	Q99727	TIMP4	0	0	Neurology	TIMP4	3	12039463	rs2618403	C	T	C	T	0.203509	570	-0.397584	0.0647406	1.55e-09	3	12194551	12200851	TIMP4 (Pietzner 2021)	TRUE	TRUE
FBLN2:P98095:OID30378	OID30378	P98095	FBLN2	0	0	Cardiometabolic_II	FBLN2	3	13874639	rs34620223	C	T	T	C	0.0144124	451	-1.05754	0.25675	4.54e-05	3	13573824	13679922	----	NA	FALSE
BTD:P43251:OID30754	OID30754	P43251	BTD	0	0	Inflammation_II	BTD	3	15686693	rs13078881	G	C	C	G	0.0419426	453	-0.854338	0.151358	2.96e-08	3	15642848	15687329	BTD (Pietzner 2021)	TRUE	TRUE
TOP2B:Q02880:OID30559	OID30559	Q02880	TOP2B	0	0	Inflammation_II	TOP2B	3	26516100	rs2134321	T	C	C	T	0.325132	569	-0.250007	0.0615639	5.58e-05	3	25639475	25706398	----	NA	FALSE
SUSD5:O60279:OID30650	OID30650	O60279	SUSD5	1	0	Inflammation_II	SUSD5	3	33225834	rs9872952	C	T	C	T	0.135714	560	0.595968	0.0745097	7.46e-15	3	33191537	33260707	----	NA	FALSE
SUSD5:O60279:OID30650	OID30650	O60279	SUSD5	0	0	Inflammation_II	SUSD5	3	33531616	rs12053956	G	T	T	G	0.142355	569	0.411852	0.0767265	1.17e-07	3	33191537	33260707	----	NA	FALSE
GASK1A:Q9UFP1:OID30109	OID30109	Q9UFP1	GASK1A	1	0.1739	Cardiometabolic_II	GASK1A	3	42188521	rs78755683	C	T	T	C	0.0165929	452	1.07552	0.257504	3.56e-05	3	43020759	43101703	----	NA	FALSE
GASK1A:Q9UFP1:OID30109	OID30109	Q9UFP1	GASK1A	0	0.1739	Cardiometabolic_II	GASK1A	3	43126405	rs493412	C	T	C	T	0.367311	569	-0.307564	0.0584484	2.03e-07	3	43020759	43101703	----	NA	FALSE
CDCP1:Q9H5V8:OID20940	OID20940	Q9H5V8	CDCP1	0	0	Neurology	CDCP1	3	45197189	rs7615239	G	C	C	G	0.206402	453	0.283422	0.0683598	4.05e-05	3	45123770	45187914	CDCP1 (Pietzner 2021)	TRUE	TRUE
TDGF1:P13385:OID20816	OID20816	P13385	TDGF1	0	0.4916	Neurology	TDGF1	3	46642005	rs4682823	T	G	T	G	0.272487	567	1.01524	0.05126	1.63e-66	3	46616045	46668033	TDGF1 (Sun, 2018, Pietzner 2021)	TRUE	TRUE
LZTFL1:Q9NQ48:OID30637	OID30637	Q9NQ48	LZTFL1	0	0.0184	Inflammation_II	LZTFL1	3	46761603	rs57987061	G	A	A	G	0.152557	567	0.322554	0.0816435	8.79e-05	3	45864808	45957534	----	NA	FALSE
MST1:P26927:OID30713	OID30713	P26927	MST1	0	0.0067	Inflammation_II	MST1	3	49678651	rs4283605	A	G	G	A	0.29174	569	-0.939073	0.051153	2.8e-59	3	49721380	49726934	MST1 (Sun, Emilsson, Pietzner 2021)	TRUE	TRUE
ITIH3:Q06033:OID20352	OID20352	Q06033	ITIH3	0	0	Cardiometabolic	ITIH3	3	52808341	rs1014969	G	A	A	G	0.448763	566	0.315106	0.0555064	2.21e-08	3	52828784	52843025	ITIH3 (Pietzner 2021)	TRUE	TRUE
ITIH1:P19827:OID30722	OID30722	P19827	ITIH1	0	0	Inflammation_II	ITIH1	3	52820981	rs678	A	T	T	A	0.395614	570	-0.356726	0.0573655	9.81e-10	3	52811603	52826078	ITIH1 (Emilsson, Pietzner 2021)	TRUE	TRUE
IL17RB:Q9NRM6:OID20585	OID20585	Q9NRM6	IL17RB	0	0	Inflammation	IL17RB	3	53883910	rs4687751	C	T	C	T	0.357018	570	0.707707	0.05131	1.78e-37	3	53880607	53899827	----	FALSE	TRUE
FHIT:P49789:OID20872	OID20872	P49789	FHIT	0	0.0485	Neurology	FHIT	3	59957116	rs6446102	A	G	A	G	0.406667	450	-0.266574	0.0673568	8.82e-05	3	59735036	61237133	----	FALSE	TRUE
LRIG1:Q96JA1:OID21429	OID21429	Q96JA1	LRIG1	1	0	Oncology	LRIG1	3	66426912	rs7627907	A	G	G	A	0.332746	568	-0.823052	0.0504357	3.02e-49	3	66429221	66551687	LRIG1 (Pietzner 2021)	TRUE	TRUE
LRIG1:Q96JA1:OID21429	OID21429	Q96JA1	LRIG1	0	0	Oncology	LRIG1	3	66475868	rs783511	T	C	C	T	0.514349	453	-0.295696	0.0639184	4.89e-06	3	66429221	66551687	LRIG1 (Pietzner 2021)	TRUE	TRUE
CNTN3:Q9P232:OID21092	OID21092	Q9P232	CNTN3	0	0	Neurology	CNTN3	3	74595819	rs7427367	G	A	G	A	0.0630531	452	0.672487	0.129968	3.47e-07	3	74311719	74570291	----	NA	FALSE
CD200R1:Q8TD46:OID20595	OID20595	Q8TD46	CD200R1	1	0	Inflammation	CD200R1	3	112631154	rs6438114	A	C	A	C	0.421378	566	-0.342339	0.0596586	1.57e-08	3	112640056	112693969	CD200R1 (Sun, Emilsson)	TRUE	TRUE
CD200R1:Q8TD46:OID20595	OID20595	Q8TD46	CD200R1	0	0	Inflammation	CD200R1	3	112642122	rs16860233	C	T	T	C	0.0315789	570	1.71419	0.155266	8.85e-26	3	112640056	112693969	CD200R1 (PMID:31320639, Pietzner 2021)	TRUE	TRUE
CD80:P33681:OID30291	OID30291	P33681	CD80	0	0	Cardiometabolic_II	CD80	3	119283468	rs60920700	T	C	C	T	0.0853659	451	0.530414	0.110104	2e-06	3	119243140	119278449	----	FALSE	TRUE
NUDT16:Q96DE0:OID31484	OID31484	Q96DE0	NUDT16	0	0	Oncology_II	NUDT16	3	131079828	rs141738207	C	G	G	C	0.0254833	569	-0.736665	0.186808	9.05e-05	3	131100515	131107674	----	NA	FALSE
TF:P02787:OID30783	OID30783	P02787	TF	0	0	Inflammation_II	TF	3	133519981	rs9853615	A	G	G	A	0.360927	453	-0.28471	0.0668703	2.52e-05	3	133464800	133497850	TF (Pietzner 2021, p=2.26e-6)	TRUE	TRUE
CLSTN2:Q9H4D0:OID20664	OID20664	Q9H4D0	CLSTN2	0	0	Inflammation	CLSTN2	3	139614254	rs13065203	G	A	A	G	0.189046	566	-0.400053	0.0728205	6e-08	3	139654027	140296239	CLSTN2 (Pietzner 2021)	TRUE	TRUE
LXN:Q9BS40:OID21003	OID21003	Q9BS40	LXN	0	0	Neurology	LXN	3	158188403	rs6799272	A	T	T	A	0.410369	569	-0.252887	0.0588225	2.02e-05	3	158363611	158390482	----	NA	FALSE
BCHE:P06276:OID30717	OID30717	P06276	BCHE	0	0	Inflammation_II	BCHE	3	165493454	rs2668206	A	C	A	C	0.306416	452	-0.512073	0.0649746	2.54e-14	3	165490692	165555260	----	FALSE	TRUE	ACHE (Pietzner 2021)
TNFSF10:P50591:OID20611	OID20611	P50591	TNFSF10	0	0	Inflammation	TNFSF10	3	172253678	rs6764884	G	T	T	G	0.0707965	452	-0.520335	0.12783	5.56e-05	3	172223298	172241297	----	FALSE	TRUE
AHSG:P02765:OID30706	OID30706	P02765	AHSG	0	0	Inflammation_II	AHSG	3	186328951	rs35094235	T	G	T	G	0.29823	565	-0.559721	0.0586022	4.05e-20	3	186330712	186339107	AHSG (Sun 2018, Pietzner 2021)	TRUE	TRUE
KNG1:P01042:OID30695	OID30695	P01042	KNG1	0	0	Inflammation_II	KNG1	3	186381578	rs9824398	T	C	T	C	0.413907	453	0.295441	0.0677453	1.61e-05	3	186435065	186461743	KNG1 (Pietzner 2021, p=1.22e-7)	TRUE	TRUE
HRG:P04196:OID30770	OID30770	P04196	HRG	0	0	Inflammation_II	HRG	3	186383066	rs3890864	G	A	A	G	0.134658	453	0.575016	0.0872554	1.25e-10	3	186378005	186396029	HRG (Pietzner 2021)	TRUE	TRUE
ADIPOQ:Q15848:OID30748	OID30748	Q15848	ADIPOQ	1	0	Inflammation_II	ADIPOQ	3	186546540	rs266772	C	T	T	C	0.0476718	451	-0.721951	0.143295	6.86e-07	3	186560463	186576252	ADIPOQ (Pietzner 2021)	TRUE	TRUE
ADIPOQ:Q15848:OID30748	OID30748	Q15848	ADIPOQ	0	0	Inflammation_II	ADIPOQ	3	186558818	rs57056768	G	A	A	G	0.0960265	453	0.441651	0.109579	6.55e-05	3	186560463	186576252	ADIPOQ (Pietzner 2021)	TRUE	TRUE
IL1RAP:Q9NPH3:OID21126	OID21126	Q9NPH3	IL1RAP	0	0	Neurology	IL1RAP	3	190344128	rs11927365	G	A	G	A	0.145695	453	1.49662	0.0644478	1.13e-78	3	190231840	190375843	IL1RAP (PMID:33328453, Pitzner 2021)	TRUE	TRUE
TFRC:P02786:OID20369	OID20369	P02786	TFRC	0	0	Cardiometabolic	TFRC	3	195792905	rs9852883	A	C	A	C	0.406667	450	0.383499	0.065895	1.13e-08	3	195754054	195809060	TFRC (Pietzner 2021)	TRUE	TRUE
MELTF:P08582:OID30347	OID30347	P08582	MELTF	1	0	Cardiometabolic_II	MELTF	3	196143030	rs61345811	C	T	T	C	0.245011	451	-0.316044	0.0791605	7.66e-05	3	196715492	196756687	----	NA	FALSE
MELTF:P08582:OID30347	OID30347	P08582	MELTF	0	0	Cardiometabolic_II	MELTF	3	196726039	rs4916453	G	A	A	G	0.434879	453	-0.343985	0.0640813	1.29e-07	3	196715492	196756687	----	NA	FALSE
SPON2:Q9BUD6:OID20221	OID20221	Q9BUD6	SPON2	0	0	Cardiometabolic	SPON2	4	1152336	rs80343107	C	T	T	C	0.0679012	567	0.435915	0.105188	3.94e-05	4	1160720	1202750	SPON2 (Pietzner 2021)	TRUE	TRUE
HGFAC:Q04756:OID30718	OID30718	Q04756	HGFAC	0	0	Inflammation_II	HGFAC	4	3298800	rs2051559	T	C	C	T	0.146749	569	-0.501127	0.0767404	1.48e-10	4	3443614	3451211	----	FALSE	TRUE
CYTL1:Q9NRR1:OID30374	OID30374	Q9NRR1	CYTL1	0	0	Cardiometabolic_II	CYTL1	4	5035587	rs6446315	G	A	G	A	0.206402	453	0.592292	0.0806462	9.97e-13	4	5016313	5021199	CYTL1 (Pietzner 2021)	TRUE	TRUE
MAN2B2:Q9Y2E5:OID30306	OID30306	Q9Y2E5	MAN2B2	0	0	Cardiometabolic_II	MAN2B2	4	6593117	rs6847759	T	C	C	T	0.334437	453	0.35516	0.065952	1.18e-07	4	6576902	6625089	MAN2B2 (Pietzner 2021)	TRUE	TRUE
SORCS2:Q96PQ0:OID21262	OID21262	Q96PQ0	SORCS2	0	0	Oncology	SORCS2	4	7219933	rs4234798	T	G	T	G	0.359649	570	0.379409	0.0569049	6.24e-11	4	7194265	7744554	----	FALSE	TRUE
PSAPL1:Q6NUJ1:OID31473	OID31473	Q6NUJ1	PSAPL1	0	0	Oncology_II	PSAPL1	4	7435194	rs12498567	G	A	A	G	0.190157	447	0.697472	0.0787463	2.06e-17	4	7432022	7436700	PSAPL1 (Pietzner 2021)	TRUE	TRUE
AFAP1:Q8N556:OID30569	OID30569	Q8N556	AFAP1	0	0.7241	Inflammation_II	AFAP1	4	7780582	rs41264705	C	T	T	C	0.313051	567	0.955773	0.0504879	4.21e-62	4	7760441	7941653	----	NA	FALSE
BST1:Q10588:OID21051	OID21051	Q10588	BST1	0	0	Neurology	BST1	4	15647074	rs7683000	A	G	G	A	0.144592	453	-1.24059	0.0757218	1.58e-47	4	15704573	15739936	BST1 (Pietzner 2021)	TRUE	TRUE
CD38:P28907:OID21316	OID21316	P28907	CD38	0	0	Oncology	CD38	4	15791867	rs71613232	A	G	G	A	0.221111	450	-0.419789	0.0773832	9.58e-08	4	15779898	15854853	----	FALSE	TRUE
FGFBP2:Q9BYJ0:OID30395	OID30395	Q9BYJ0	FGFBP2	0	0	Cardiometabolic_II	FGFBP2	4	15958951	rs1860235	A	C	A	C	0.12412	568	0.630904	0.0867681	1.21e-12	4	15961866	15970932	----	NA	FALSE
QDPR:P09417:OID20174	OID20174	P09417	QDPR	0	0	Cardiometabolic	QDPR	4	17488132	rs10604	A	G	G	A	0.320106	567	-0.24496	0.0578044	2.64e-05	4	17461884	17513857	QDPR (Pietzner 2021)	TRUE	TRUE
TLR1:Q15399:OID30532	OID30532	Q15399	TLR1	0	0.005	Inflammation_II	TLR1	4	38773057	rs11735251	T	A	A	T	0.252632	570	0.483771	0.0661302	8.92e-13	4	38792298	38858438	TLR1 (Pietzner 2021)	TRUE	TRUE
KLB:Q86Z14:OID20888	OID20888	Q86Z14	KLB	0	0.2341	Neurology	KLB	4	39450229	rs4975017	C	A	A	C	0.330702	570	-0.560628	0.0586337	3.61e-20	4	39408473	39453156	KLB (Pietzner 2021)	TRUE	TRUE
KDR:P35968:OID21497	OID21497	P35968	KDR	0	0	Oncology	KDR	4	55972946	rs34231037	A	G	G	A	0.0298013	453	-1.09531	0.192445	2.29e-08	4	55944644	55991756	----	FALSE	TRUE
IGFBP7:Q16270:OID20236	OID20236	Q16270	IGFBP7	0	0	Cardiometabolic	IGFBP7	4	57951253	rs10866442	C	G	C	G	0.228471	569	0.33778	0.0607081	4.09e-08	4	57896939	57976551	IGFBP7 (Pietzner 2021)	TRUE	TRUE
GC:P02774:OID30780	OID30780	P02774	GC	1	0	Inflammation_II	GC	4	72324124	rs12513167	A	G	G	A	0.0497336	563	-0.549654	0.139576	9.26e-05	4	72607410	72669758	----	FALSE	TRUE
GC:P02774:OID30780	OID30780	P02774	GC	0	0	Inflammation_II	GC	4	72615362	rs11723621	A	G	G	A	0.250877	570	1.25907	0.047122	4.45e-102	4	72607410	72669758	GC (PMID: 27532455, Pietzner 2021)	TRUE	TRUE
AFP:P02771:OID20978	OID20978	P02771	AFP	0	0	Neurology	AFP	4	74288714	rs12510553	A	G	G	A	0.207506	453	-0.333919	0.0757745	1.32e-05	4	74296855	74321891	AFP (Pietzner 2021, p=2.45e-7)	TRUE	TRUE
CXCL6:P80162:OID20613	OID20613	P80162	CXCL6	0	0	Inflammation	CXCL6	4	74621070	rs11931924	T	C	C	T	0.415344	567	0.349387	0.0565663	1.26e-09	4	74702214	74714781	CXCL6 (Pietzner 2021)	TRUE	TRUE
CXCL1:P09341:OID20762	OID20762	P09341	CXCL1	0	0	Inflammation	CXCL1	4	74745550	rs10021230	T	A	A	T	0.236203	453	0.591344	0.0718665	2.13e-15	4	74735110	74736959	----	FALSE	TRUE
CXCL5:P42830:OID20207	OID20207	P42830	CXCL5	0	0	Cardiometabolic	CXCL5	4	74856663	rs187080	T	C	T	C	0.103357	566	0.461134	0.0909537	5.42e-07	4	74861359	74864496	CXCL5 (Pietzner 2021)	TRUE	TRUE
NAAA:Q02083:OID20931	OID20931	Q02083	NAAA	0	0	Neurology	NAAA	4	76856355	rs28647886	T	C	C	T	0.233333	570	-0.528402	0.0644913	1.73e-15	4	76831809	76862204	NAAA (Pietzner 2021)	TRUE	TRUE
ART3:Q13508:OID20346	OID20346	Q13508	ART3	0	0	Cardiometabolic	ART3	4	77001838	rs7656734	A	G	G	A	0.131206	564	0.385444	0.0846138	6.43e-06	4	76932337	77033955	ART3 (Pietzner 2021)	TRUE	TRUE
SCARB2:Q14108:OID20943	OID20943	Q14108	SCARB2	0	0	Neurology	SCARB2	4	77011413	rs7675618	G	A	A	G	0.130282	568	0.344356	0.0723037	2.44e-06	4	77079890	77135046	----	FALSE	TRUE
SPARCL1:Q14515:OID20361	OID20361	Q14515	SPARCL1	0	0	Cardiometabolic	SPARCL1	4	88443470	rs17012774	T	C	C	T	0.236796	568	0.654203	0.062182	9.67e-24	4	88394487	88452213	SPARCL1 (Pietzner 2021)	TRUE	TRUE
HPGDS:O60760:OID21266	OID21266	O60760	HPGDS	0	0.005	Oncology	HPGDS	4	95394323	rs141191936	G	A	A	G	0.0342163	453	-0.993504	0.177828	4.04e-08	4	95219686	95264027	HPGDS (Pietzner 2021)	TRUE	TRUE
CFI:P05156:OID30772	OID30772	P05156	CFI	0	0	Inflammation_II	CFI	4	110656730	rs7439493	G	A	A	G	0.375439	570	0.228328	0.0551506	4.01e-05	4	110661852	110723335	CFI (Sun, Suhre, Pietzner 2021)	TRUE	TRUE
FGF2:P09038:OID20503	OID20503	P09038	FGF2	0	0.4114	Inflammation	FGF2	4	123652029	rs309355	C	T	T	C	0.279867	452	-0.588719	0.069504	3.64e-16	4	123747863	123819391	FGF2 (Pietzner 2021)	TRUE	TRUE
CLGN:O14967:OID30957	OID30957	O14967	CLGN	0	0.2057	Neurology_II	CLGN	4	141322236	rs7681627	C	T	T	C	0.084989	453	0.859233	0.107064	9.12e-15	4	141309609	141349122	----	FALSE	TRUE
TLR3:O15455:OID20612	OID20612	O15455	TLR3	0	0	Inflammation	TLR3	4	186994856	rs6552950	G	A	G	A	0.261062	565	-0.482832	0.0644864	2.77e-13	4	186990306	187009223	TLR3 (Pietzner 2021)	TRUE	TRUE
KLKB1:P03952:OID30760	OID30760	P03952	KLKB1	0	0	Inflammation_II	KLKB1	4	187167103	rs4253289	A	C	C	A	0.0921053	570	-0.603063	0.0934519	2.37e-10	4	187130133	187179625	----	FALSE	TRUE
F11:P03951:OID30773	OID30773	P03951	F11	0	0	Inflammation_II	F11	4	187207381	rs2289252	C	T	T	C	0.417219	453	0.432325	0.0639021	4.21e-11	4	187187099	187210835	F11 (Suhre 2017, Pietzner 2021)	TRUE	TRUE
PDCD6:O75340:OID20163	OID20163	O75340	PDCD6	0	0.005	Cardiometabolic	PDCD6	5	225267	rs6885693	C	A	A	C	0.0982301	565	-1.54484	0.0773654	2.77e-67	5	271736	353971	PDCD6 (Pietzner, p = 2.25e-4)	FALSE	TRUE
CDH6:P55285:OID20157	OID20157	P55285	CDH6	1	0	Cardiometabolic	CDH6	5	30842054	rs12517438	T	G	T	G	0.446667	450	-0.484537	0.0638433	1.93e-13	5	31193857	31329253	----	FALSE	TRUE
CDH6:P55285:OID20157	OID20157	P55285	CDH6	0	0	Cardiometabolic	CDH6	5	31287406	rs17398305	G	T	G	T	0.425721	451	-0.291015	0.0657043	1.19e-05	5	31193857	31329253	----	FALSE	TRUE
IL7R:P16871:OID21136	OID21136	P16871	IL7R	0	0	Neurology	IL7R	5	35874575	rs6897932	C	T	T	C	0.264035	570	-0.666876	0.0579413	1.15e-27	5	35852797	35879705	IL7R (Pietzner 2021)	TRUE	TRUE
GDNF:P39905:OID20861	OID20861	P39905	GDNF	0	0.005	Neurology	GDNF	5	37837032	rs11749171	C	T	T	C	0.128035	453	-0.532662	0.0974235	7.63e-08	5	37812779	37839788	----	FALSE	TRUE
EGFLAM:Q63HQ2:OID31496	OID31496	Q63HQ2	EGFLAM	0	0	Oncology_II	EGFLAM	5	38349573	rs2561113	T	C	C	T	0.187831	567	-0.553283	0.0725614	1.06e-13	5	38258511	38465123	EGFLAM (Pietzner 2021)	TRUE	TRUE
OSMR:Q99650:OID20356	OID20356	Q99650	OSMR	0	0	Cardiometabolic	OSMR	5	38856662	rs967696	A	G	G	A	0.233333	450	-0.562072	0.0655965	1.78e-16	5	38845960	38945698	OSMR (Pietzner 2021, p=1.66e-6)	TRUE	TRUE
C7:P10643:OID30766	OID30766	P10643	C7	1	0	Inflammation_II	C7	5	40972211	rs74480769	A	G	G	A	0.0210177	452	-1.5745	0.203802	7.51e-14	5	40909354	40983041	C7 (Emilsson, Pietzner 2021)	TRUE	TRUE
C7:P10643:OID30766	OID30766	P10643	C7	0	0	Inflammation_II	C7	5	41267562	rs399661	T	C	C	T	0.292222	450	0.482055	0.0681452	5.95e-12	5	40909354	40983041	C7 (Pietzner 2021)	TRUE	TRUE
GHR:P10912:OID30574	OID30574	P10912	GHR	0	0	Inflammation_II	GHR	5	42656944	rs6864999	C	A	C	A	0.239859	567	-0.355504	0.0659403	1.03e-07	5	42423879	42721979	GHR (Pietzner 2021)	TRUE	TRUE
ITGA2:P17301:OID30570	OID30570	P17301	ITGA2	0	0	Inflammation_II	ITGA2	5	52248776	rs6894884	T	C	T	C	0.272487	567	0.526306	0.0639097	1.28e-15	5	52285156	52390609	ITGA2 (Pietzner 2021)	TRUE	TRUE
MOCS2:O96007:OID30638	OID30638	O96007	MOCS2	0	0	Inflammation_II	MOCS2	5	52401308	rs114966394	G	A	A	G	0.0369069	569	-1.09126	0.139511	2.6e-14	5	52391509	52405893	----	NA	FALSE
SNX18:Q96RF0:OID31476	OID31476	Q96RF0	SNX18	0	0.4967	Oncology_II	SNX18	5	53606295	rs35941	T	C	T	C	0.160044	453	-0.394323	0.086441	6.57e-06	5	53813589	53842415	----	NA	FALSE
IL31RA:Q8NI17:OID30475	OID30475	Q8NI17	IL31RA	0	0.0334	Inflammation_II	IL31RA	5	55205595	rs161651	C	T	T	C	0.345475	453	-0.480953	0.06526	8.41e-13	5	55147207	55218678	----	FALSE	TRUE
IL6ST:P40189:OID20147	OID20147	P40189	IL6ST	0	0	Cardiometabolic	IL6ST	5	55289153	rs3827618	C	A	A	C	0.140957	564	0.453842	0.0818621	4.58e-08	5	55230923	55290821	----	FALSE	TRUE
HTR1A:P08908:OID30824	OID30824	P08908	HTR1A	0	0.6739	Neurology_II	HTR1A	5	62346311	rs67601077	C	T	T	C	0.151214	453	-0.393231	0.0933867	3.08e-05	5	63256183	63258334	----	NA	FALSE
CRHBP:P24387:OID20747	OID20747	P24387	CRHBP	0	0	Inflammation	CRHBP	5	76194302	rs2359426	C	T	C	T	0.336303	449	0.578252	0.0609226	1.45e-19	5	76248538	76276983	CRHBP (Pietzner 2021)	TRUE	TRUE
TBCA:O75347:OID30616	OID30616	O75347	TBCA	0	0	Inflammation_II	TBCA	5	76980679	rs2546155	T	C	C	T	0.304577	568	0.311933	0.0611359	4.6e-07	5	76986991	77164604	TBCA (Pietzner 2021, p=0.0361)	FALSE	TRUE
VCAN:P13611:OID21026	OID21026	P13611	VCAN	0	0	Neurology	VCAN	5	82833369	rs309559	A	G	A	G	0.49912	568	0.711223	0.0478324	2.22e-42	5	82767284	82878122	----	FALSE	TRUE
GLRX:P35754:OID20195	OID20195	P35754	GLRX	0	0	Cardiometabolic	GLRX	5	95165112	rs7736003	C	G	G	C	0.0899471	567	0.807206	0.0973943	8.62e-16	5	95087023	95158709	GLRX (Pietzner 2021)	TRUE	TRUE
PAM:P19021:OID20291	OID20291	P19021	PAM	1	0	Cardiometabolic	PAM	5	102170617	rs73189054	G	T	T	G	0.0149648	568	-0.933605	0.228012	4.85e-05	5	102089685	102366809	PAM (Pietzner 2021)	TRUE	TRUE
PAM:P19021:OID20291	OID20291	P19021	PAM	0	0	Cardiometabolic	PAM	5	102586407	rs75432112	G	A	A	G	0.0354767	451	-1.08532	0.167988	2.76e-10	5	102089685	102366809	PAM (Pietzner 2021)	TRUE	TRUE
MEGF10:Q96KG7:OID20746	OID20746	Q96KG7	MEGF10	0	0	Inflammation	MEGF10	5	126793367	rs78940206	T	G	G	T	0.0202822	567	1.23409	0.203531	2.46e-09	5	126626523	126801429	----	FALSE	TRUE
FBN2:P35556:OID30974	OID30974	P35556	FBN2	0	0.6003	Neurology_II	FBN2	5	128003269	rs75068251	G	A	A	G	0.0716814	565	0.539737	0.114471	3.06e-06	5	127593601	127994878	----	NA	FALSE
TXNDC15:Q96J42:OID21495	OID21495	Q96J42	TXNDC15	0	0	Oncology	TXNDC15	5	134257519	rs9285933	G	A	A	G	0.128947	570	1.09592	0.0743792	8.94e-42	5	134209493	134237215	TXNDC15 (PMID: 30072576, Pietzner 2021)	TRUE	TRUE
LECT2:O14960:OID30320	OID30320	O14960	LECT2	0	0.0017	Cardiometabolic_II	LECT2	5	135292117	rs248167	A	G	A	G	0.344371	453	-0.789404	0.0539574	7.7e-40	5	135257968	135290723	LECT2 (Pietzner 2021)	TRUE	TRUE
TGFBI:Q15582:OID20417	OID20417	Q15582	TGFBI	0	0	Cardiometabolic	TGFBI	5	135397018	rs2302038	T	C	C	T	0.479789	569	0.499628	0.0535901	2.59e-19	5	135364584	135399507	TGFBI (Pietzner 2021)	TRUE	TRUE
SPOCK1:Q08629:OID20924	OID20924	Q08629	SPOCK1	0	0	Neurology	SPOCK1	5	136070252	rs1544340	A	T	T	A	0.345133	452	0.28796	0.0671185	2.19e-05	5	136310987	136934068	----	FALSE	TRUE
CD14:P08571:OID20378	OID20378	P08571	CD14	0	0	Cardiometabolic	CD14	5	140012916	rs2569190	A	G	A	G	0.442882	569	0.284483	0.0550051	3.23e-07	5	140011313	140013286	CD14 (Pietzner 2021)	TRUE	TRUE
PCDHB15:Q9Y5E8:OID31377	OID31377	Q9Y5E8	PCDHB15	0	0	Oncology_II	PCDHB15	5	140560641	rs7730978	A	G	G	A	0.261589	453	-0.486246	0.0717086	3.82e-11	5	140625164	140627816	----	NA	FALSE
PCDH12:Q9NPG4:OID31045	OID31045	Q9NPG4	PCDH12	0	0	Neurology_II	PCDH12	5	141298977	rs3855086	T	C	T	C	0.382456	570	-0.282796	0.0609468	4.34e-06	5	141323150	141349304	----	NA	FALSE
SPINK1:P00995:OID21097	OID21097	P00995	SPINK1	0	0	Neurology	SPINK1	5	147208043	rs6580502	T	C	T	C	0.371965	453	0.278181	0.0658918	2.94e-05	5	147204131	147211349	SPINK1 (PMID: 27532455, Pietzner 2021)	TRUE	TRUE
SPINK5:Q9NQ38:OID21148	OID21148	Q9NQ38	SPINK5	0	0	Neurology	SPINK5	5	147508651	rs2112766	T	C	T	C	0.380266	451	-0.420036	0.067257	9.95e-10	5	147405246	147516852	SPINK5 (Pietzner 2021)	TRUE	TRUE
SPINK6:Q6UWN8:OID21450	OID21450	Q6UWN8	SPINK6	0	0	Oncology	SPINK6	5	147558316	rs1974627	T	G	T	G	0.433185	449	0.383997	0.0633991	2.98e-09	5	147582357	147594700	SPINK6 (Pietzner 2021)	TRUE	TRUE
PDGFRB:P09619:OID20268	OID20268	P09619	PDGFRB	0	0	Cardiometabolic	PDGFRB	5	149515074	rs740750	G	A	G	A	0.487859	453	-1.20351	0.0339296	1.2e-131	5	149493400	149535435	PDGFRB (Emilsson, Sun, Pietzner..)	TRUE	TRUE
GM2A:P17900:OID30413	OID30413	P17900	GM2A	0	0	Cardiometabolic_II	GM2A	5	150600772	rs153467	G	T	G	T	0.339602	452	0.522981	0.0559002	4.17e-19	5	150591711	150650001	GM2A (Pietzner 2021)	TRUE	TRUE
GALNT10:Q86SR1:OID21371	OID21371	Q86SR1	GALNT10	0	0	Oncology	GALNT10	5	153580836	rs1106324	A	G	A	G	0.473392	451	-0.313324	0.0666295	3.44e-06	5	153570290	153800544	GALNT10 (Pietzner 2021, p=1.70E-4)	FALSE	TRUE
MFAP3:P55082:OID20057	OID20057	P55082	MFAP3	0	0.4649	Cardiometabolic	MFAP3	5	154443591	rs286606	T	C	C	T	0.49287	561	0.27252	0.059909	6.64e-06	5	153418466	153600038	----	NA	FALSE
LARP1:Q6PKG0:OID31372	OID31372	Q6PKG0	LARP1	0	0.2642	Oncology_II	LARP1	5	155193047	rs62382292	G	T	T	G	0.0311111	450	-0.831262	0.192237	1.89e-05	5	154092462	154197167	----	NA	FALSE
HAVCR1:Q96D42:OID21422	OID21422	Q96D42	HAVCR1	0	0	Oncology	HAVCR1	5	156478644	rs7702877	C	T	T	C	0.346325	449	0.411141	0.0600385	2.53e-11	5	156456424	156486130	HAVCR1 (Pietzner 2021)	TRUE	TRUE
IL12A_IL12B:P29459_P29460:OID21327	OID21327	P29459_P29460	IL12B	1	0	Oncology	IL12A_IL12B	5	158792819	rs10076557	C	G	C	G	0.274834	453	-0.559079	0.0658797	3.22e-16	5	158741791	158757895	IL12B (Pietzner 2021)	NA	TRUE
IL12B:P29460:OID20666	OID20666	P29460	IL12B	0	0	Inflammation	IL12B	5	158803086	rs6897260	A	G	A	G	0.275938	453	-0.535298	0.0644782	1.24e-15	5	158741791	158757895	IL12B (Pietzner 2021)	TRUE	TRUE
FGFR4:P22455:OID30646	OID30646	P22455	FGFR4	0	0	Inflammation_II	FGFR4	5	176511432	rs451643	G	T	T	G	0.3	570	0.870345	0.0523513	9.3e-51	5	176513887	176525145	FGFR4 (Pietzner, p = 0.0257)	FALSE	TRUE
F12:P00748:OID30739	OID30739	P00748	F12	0	0	Inflammation_II	F12	5	176836532	rs1801020	A	G	A	G	0.248246	570	-1.15159	0.0496342	5.38e-84	5	176829141	176836577	F12 (PMID: 23381943)	NA	TRUE
SERPINB6:P35237:OID21023	OID21023	P35237	SERPINB6	0	0	Neurology	SERPINB6	6	2970280	rs74555524	C	T	T	C	0.0861456	563	0.402363	0.0989833	5.5e-05	6	2948393	2972090	----	NA	FALSE
BMP6:P22004:OID20111	OID20111	P22004	BMP6	1	0.0201	Cardiometabolic	BMP6	6	7016632	rs1750241	C	T	T	C	0.196667	450	-0.35393	0.083862	2.96e-05	6	7727030	7881655	----	FALSE	TRUE
BMP6:P22004:OID20111	OID20111	P22004	BMP6	0	0.0201	Cardiometabolic	BMP6	6	7744876	rs55837820	A	T	T	A	0.0827815	453	0.496476	0.116219	2.37e-05	6	7727030	7881655	BMP6 (Pietzner 2021, p=8.19e-4)	FALSE	TRUE
GMPR:P36959:OID20641	OID20641	P36959	GMPR	0	0	Inflammation	GMPR	6	16289648	rs79989301	T	C	C	T	0.145695	453	0.494514	0.0924741	1.43e-07	6	16238811	16295780	GMPR (Pietzner 2021)	TRUE	TRUE
TPMT:P51580:OID21270	OID21270	P51580	TPMT	0	0.0435	Oncology	TPMT	6	18103028	rs73726531	C	G	G	C	0.0452539	453	-0.902404	0.141999	5.17e-10	6	18128542	18155305	----	FALSE	TRUE
ALDH5A1:P51649:OID31047	OID31047	P51649	ALDH5A1	0	0.5803	Neurology_II	ALDH5A1	6	24445131	rs793715	T	C	T	C	0.05	570	-0.548351	0.128552	2.34e-05	6	24495080	24537435	----	FALSE	TRUE
KIAA0319:Q5VV43:OID31094	OID31094	Q5VV43	KIAA0319	0	0	Neurology_II	KIAA0319	6	24632642	rs761100	A	C	A	C	0.45585	453	-0.253163	0.0616613	4.8e-05	6	24544332	24646383	----	NA	FALSE
BTN2A1:Q7KYR7:OID20713	OID20713	Q7KYR7	BTN2A1	0	0	Inflammation	BTN2A1	6	25840450	rs11751616	A	G	G	A	0.0618102	453	-0.518532	0.131166	8.97e-05	6	26458150	26476849	----	FALSE	TRUE	BTN3A3 (Pietzner 2021)
BTN3A2:P78410:OID20540	OID20540	P78410	BTN3A2	0	0.0017	Inflammation	BTN3A2	6	26365679	rs58825580	T	G	G	T	0.109347	567	-0.938654	0.0964569	8.9e-21	6	26365387	26378546	BTN3A2 (Pietzner 2021)	TRUE	TRUE
MOG:Q16653:OID21384	OID21384	Q16653	MOG	0	0	Oncology	MOG	6	29684542	rs113682850	C	T	T	C	0.0342163	453	-0.721817	0.171127	2.99e-05	6	29624758	29640149	----	FALSE	TRUE
HLA-E:P13747:OID20532	OID20532	P13747	HLA-E	0	0	Inflammation	HLA-E	6	29829251	rs1611713	A	C	C	A	0.268421	570	0.35713	0.0738462	1.71e-06	6	30457244	30461982	----	NA	FALSE
HLA-A:P04439:OID31048	OID31048	P04439	HLA-A	0	0	Neurology_II	HLA-A	6	29943866	rs2245950	G	A	A	G	0.335965	570	0.779964	0.0613682	1.06e-32	6	29909037	29913661	----	NA	FALSE
DDR1:Q08345:OID21009	OID21009	Q08345	DDR1	1	0	Neurology	DDR1	6	30114845	rs4959012	T	C	C	T	0.155203	567	-0.381848	0.0833969	5.77e-06	6	30844198	30867933	----	FALSE	TRUE
CDSN:Q15517:OID20667	OID20667	Q15517	CDSN	1	0	Inflammation	CDSN	6	30861398	rs59846247	G	C	C	G	0.0774648	568	0.463436	0.115137	6.48e-05	6	31082867	31088223	----	FALSE	TRUE
DDR1:Q08345:OID21009	OID21009	Q08345	DDR1	0	0	Neurology	DDR1	6	30928757	rs9461641	C	T	T	C	0.276549	452	0.439044	0.0668665	1.45e-10	6	30844198	30867933	----	FALSE	TRUE
CDSN:Q15517:OID20667	OID20667	Q15517	CDSN	1	0	Inflammation	CDSN	6	31057614	rs2508014	A	C	A	C	0.414035	570	-0.690052	0.0541812	8.13e-33	6	31082867	31088223	----	FALSE	TRUE
TNF:P01375:OID20473	OID20848	P01375	TNF	0	0	Neurology	TNF	6	31234501	rs28397310	C	A	A	C	0.119205	453	-0.412114	0.103514	8.01e-05	6	31543344	31546113	----	FALSE	TRUE
MICB_MICA:Q29980_Q29983:OID20593	OID20593	Q29980_Q29983	MICA	1	0.0535	Inflammation	MICB_MICA	6	31258393	rs2844594	G	A	A	G	0.180702	570	0.566586	0.0767247	5.56e-13	6	31371356	31383092	MICB (Pietzner 2021); MICA (Pietzner 2021)	NA	TRUE
CDSN:Q15517:OID20667	OID20667	Q15517	CDSN	0	0	Inflammation	CDSN	6	31323321	rs1050723	G	A	A	G	0.120843	451	0.413016	0.1029	7.02e-05	6	31082867	31088223	----	FALSE	TRUE
MICB_MICA:Q29980_Q29983:OID20593	OID20593	Q29980_Q29983	MICA	1	0.0535	Inflammation	MICB_MICA	6	31351313	rs9266749	C	T	T	C	0.107018	570	-0.548836	0.0902434	2.2e-09	6	31371356	31383092	MICA (Pietzner 2021)	NA	TRUE
MICB_MICA:Q29980_Q29983:OID20593	OID20593	Q29980_Q29983	MICA	0	0.0535	Inflammation	MICB_MICA	6	31398144	rs68041688	A	G	G	A	0.268014	569	-0.86737	0.0585175	3.57e-42	6	31371356	31383092	MICA (Pietzner 2021); MICB (Pietzner 2021)	NA	TRUE
LTA:P01374:OID20586	OID20586	P01374	LTA	0	0	Inflammation	LTA	6	31540757	rs2229092	A	C	C	A	0.0496689	453	-1.42445	0.139165	3.22e-22	6	31539831	31542101	LTA (Pietzner 2021, p=0.0439)	FALSE	TRUE
CFB:P00751:OID30755	OID30755	P00751	CFB	1	0	Inflammation_II	CFB	6	31598675	rs41308311	G	A	A	G	0.0228873	568	0.903599	0.183501	1.12e-06	6	31895475	31919861	CFB (Pietzner 2021)	TRUE	TRUE
DXO:O77932:OID31080	OID31080	O77932	DXO	0	0	Neurology_II	DXO	6	31887259	rs115009784	G	A	A	G	0.0465729	569	-1.00554	0.130209	5.29e-14	6	31937587	31940069	----	NA	FALSE
TNXB:P22105:OID21107	OID21107	P22105	TNXB	0	0	Neurology	TNXB	6	31920873	rs4151664	C	T	T	C	0.0324561	570	0.846063	0.165123	4.12e-07	6	32008931	32083111	TNXB (Sun, Emilsson, Pietzner 2021)	TRUE	TRUE
CFB:P00751:OID30755	OID30755	P00751	CFB	0	0	Inflammation_II	CFB	6	32192560	rs2267644	G	A	A	G	0.0503534	566	-0.692727	0.119449	1.12e-08	6	31895475	31919861	CFB (Pietzner 2021)	TRUE	TRUE
HLA-DRA:P01903:OID20520	OID20520	P01903	HLA-DRA	1	0.4983	Inflammation	HLA-DRA	6	32637527	rs9274722	T	A	A	T	0.295556	450	0.549938	0.0675154	3.93e-15	6	32407619	32412823	----	NA	FALSE
HLA-DRA:P01903:OID20520	OID20520	P01903	HLA-DRA	0	0.4983	Inflammation	HLA-DRA	6	32737507	rs9368741	G	A	A	G	0.295806	453	-0.292532	0.0744922	9.97e-05	6	32407619	32412823	----	NA	FALSE
WDR46:O15213:OID31389	OID31389	O15213	WDR46	0	0.4582	Oncology_II	WDR46	6	32797876	rs241436	A	G	G	A	0.42936	453	0.269674	0.0669523	6.62e-05	6	33246885	33257304	----	NA	FALSE
MLN:P12872:OID20541	OID20541	P12872	MLN	0	0	Inflammation	MLN	6	33778964	rs9394169	A	G	A	G	0.455263	570	0.439653	0.0521141	2.79e-16	6	33762450	33771788	MLN (Pietzner 2021)	TRUE	TRUE
CLPS:P04118:OID21156	OID21156	P04118	CLPS	1	0	Neurology	CLPS	6	35741963	rs2817064	G	A	G	A	0.335979	567	-0.656609	0.05701	1.1e-27	6	35762759	35765088	CLPS (Pietzner 2021)	TRUE	TRUE
CLPS:P04118:OID21156	OID21156	P04118	CLPS	0	0	Neurology	CLPS	6	35925798	rs10456081	C	T	T	C	0.198675	453	0.436995	0.074085	7.28e-09	6	35762759	35765088	CLPS (Pietzner 2021)	TRUE	TRUE
FKBP5:Q13451:OID20937	OID20937	Q13451	FKBP5	0	0	Neurology	FKBP5	6	36018978	rs12661173	C	T	T	C	0.0949227	453	-0.459665	0.113835	6.35e-05	6	35541362	35696360	----	NA	FALSE
CDKN1A:P38936:OID21319	OID21319	P38936	CDKN1A	0	0.0719	Oncology	CDKN1A	6	36329418	rs4713964	A	C	C	A	0.221854	453	-0.360155	0.079003	6.66e-06	6	36644305	36655116	----	FALSE	TRUE
PI16:Q6UXB8:OID30676	OID30676	Q6UXB8	PI16	0	0.0017	Inflammation_II	PI16	6	36720312	rs116348213	C	T	T	C	0.0202109	569	0.830071	0.194184	2.25e-05	6	36922209	36932613	----	NA	FALSE
MDGA1:Q8NFP4:OID20951	OID20951	Q8NFP4	MDGA1	0	0	Neurology	MDGA1	6	37671922	rs6937280	T	G	T	G	0.427305	564	0.951078	0.0401426	2.86e-86	6	37600284	37667082	MDGA1 (PMID: 31320639, Pietzner 2021)	TRUE	TRUE
GLO1:Q04760:OID20107	OID20107	Q04760	GLO1	0	0	Cardiometabolic	GLO1	6	38650628	rs4746	T	G	G	T	0.441242	451	-0.349914	0.060664	1.51e-08	6	38643701	38670917	GLO1 (Pietzner 2021, p=0.0085)	FALSE	TRUE
TREML2:Q5T2D2:OID21120	OID21120	Q5T2D2	TREML2	0	0	Neurology	TREML2	6	41165271	rs56302558	G	A	A	G	0.166667	453	-0.360712	0.0839844	2.15e-05	6	41158015	41168932	TREML2 (Pietzner 2021)	TRUE	TRUE
DNPH1:O43598:OID20744	OID20744	O43598	DNPH1	0	0	Inflammation	DNPH1	6	43205363	rs75591122	C	T	T	C	0.0794702	453	-0.744464	0.112701	1.13e-10	6	43193367	43197222	DNPH1 (Pietzner 2021)	TRUE	TRUE
VEGFA:P15692:OID20650	OID20650	P15692	VEGFA	0	0	Inflammation	VEGFA	6	43924763	rs4413611	G	A	A	G	0.457684	449	-0.573676	0.0591389	2.72e-20	6	43737921	43754224	VEGFA (Pietzner 2021)	TRUE	TRUE
ENPP5:Q9UJA9:OID20736	OID20736	Q9UJA9	ENPP5	0	0	Inflammation	ENPP5	6	46097569	rs7754915	G	A	G	A	0.346561	567	0.751097	0.0545214	2.25e-37	6	46126924	46138708	ENPP5 (Pietzner 2021)	TRUE	TRUE
CD2AP:Q9Y5K6:OID20177	OID20177	Q9Y5K6	CD2AP	0	0	Cardiometabolic	CD2AP	6	47461913	rs6931478	C	A	A	C	0.271127	568	0.578461	0.0626923	5.68e-19	6	47445525	47594999	----	NA	FALSE
CRISP2:P16562:OID21456	OID21456	P16562	CRISP2	0	0	Oncology	CRISP2	6	49720798	rs477473	A	G	G	A	0.300353	566	0.393384	0.0618446	4.19e-10	6	49660073	49681274	CRISP2 (Pietzner 2021)	TRUE	TRUE
CRISP3:P54108:OID30715	OID30715	P54108	CRISP3	0	0	Inflammation_II	CRISP3	6	49791907	rs13204884	G	A	A	G	0.375278	449	0.605201	0.0591129	3.3e-22	6	49695097	49712150	CRISP3 (Pietzner 2021, p=0.0451)	FALSE	TRUE
GFRAL:Q6UXV0:OID31091	OID31091	Q6UXV0	GFRAL	1	0	Neurology_II	GFRAL	6	55502747	rs11752812	G	A	A	G	0.099297	569	0.422058	0.0917944	5.28e-06	6	55192267	55267291	GFRAL (Pietzner 2021)	TRUE	TRUE
GFRAL:Q6UXV0:OID31091	OID31091	Q6UXV0	GFRAL	0	0	Neurology_II	GFRAL	6	55653619	rs17733982	C	T	T	C	0.0673289	453	-0.502019	0.125285	7.21e-05	6	55192267	55267291	GFRAL (Pietzner 2021, p=0.0023)	FALSE	TRUE
ADGRB3:O60242:OID20974	OID20974	O60242	ADGRB3	0	0	Neurology	ADGRB3	6	69673773	rs945528	T	C	T	C	0.36819	569	0.858297	0.0479783	6.02e-57	6	69345259	70099403	----	FALSE	TRUE
CD109:Q6YHK3:OID21108	OID21108	Q6YHK3	CD109	1	0	Neurology	CD109	6	74370966	rs9352017	T	G	G	T	0.12362	453	0.398883	0.101336	9.61e-05	6	74405508	74538040	CD109 (Emilsson, Sun, Suhre, Pietzner 2021 ..)	TRUE	TRUE
CD109:Q6YHK3:OID21108	OID21108	Q6YHK3	CD109	0	0	Neurology	CD109	6	74463894	rs6909201	A	G	G	A	0.484014	563	0.777079	0.0490059	5.78e-47	6	74405508	74538040	CD109 (Emilsson, Pietzner 2021)	TRUE	TRUE
NT5E:P21589:OID21498	OID21498	P21589	NT5E	1	0	Oncology	NT5E	6	86088659	rs2593335	C	T	T	C	0.516556	453	-0.257553	0.0643437	7.34e-05	6	86159809	86205500	NT5E (Pietzner 2021)	TRUE	TRUE
NT5E:P21589:OID21498	OID21498	P21589	NT5E	0	0	Oncology	NT5E	6	86199233	rs2229523	A	G	A	G	0.350615	569	0.559282	0.059591	1.56e-19	6	86159809	86205500	NT5E (Pietzner 2021)	TRUE	TRUE
GRIK2:Q13002:OID30977	OID30977	Q13002	GRIK2	0	0.0017	Neurology_II	GRIK2	6	101048197	rs171257	T	A	A	T	0.0518453	569	0.723914	0.135283	1.28e-07	6	101846664	102517958	----	NA	FALSE
WASF1:Q92558:OID20091	OID20091	Q92558	WASF1	0	0.6622	Cardiometabolic	WASF1	6	110718199	rs1997928	G	A	A	G	0.297118	451	-0.289659	0.0720842	6.89e-05	6	110421022	110501207	----	NA	FALSE
LAMA4:Q16363:OID20769	OID20769	Q16363	LAMA4	0	0	Inflammation	LAMA4	6	112626176	rs947717	A	G	A	G	0.322616	451	0.31009	0.0698747	1.15e-05	6	112429963	112576141	----	FALSE	TRUE
HDDC2:Q7Z4H3:OID31447	OID31447	Q7Z4H3	HDDC2	0	0.0017	Oncology_II	HDDC2	6	125574696	rs2275623	A	G	G	A	0.422737	453	-0.368272	0.0654055	3.19e-08	6	125541108	125623282	----	NA	FALSE
STX7:O15400:OID30560	OID30560	O15400	STX7	0	0.0017	Inflammation_II	STX7	6	132799096	rs6569801	T	C	T	C	0.418889	450	0.403193	0.0609092	1.05e-10	6	132767006	132834337	STX7 (Pietzner 2021)	TRUE	TRUE
VNN1:O95497:OID30711	OID30711	O95497	VNN1	0	0	Inflammation_II	VNN1	6	133017747	rs9375912	G	A	A	G	0.357301	452	-0.355854	0.0642552	5.25e-08	6	133002729	133035188	----	NA	TRUE	VNN2 (Pietzner 2021)
VNN2:O95498:OID21310	OID21310	O95498	VNN2	0	0	Oncology	VNN2	6	133074133	rs9493423	G	A	A	G	0.303769	451	-0.475634	0.0667206	4.16e-12	6	133065009	133084598	VNN2 (Pietzner 2021)	TRUE	TRUE
LRP11:Q86VZ4:OID20185	OID20185	Q86VZ4	LRP11	0	0	Cardiometabolic	LRP11	6	149951214	rs9322200	G	A	A	G	0.372807	570	0.524907	0.0499201	1e-23	6	150139934	150186199	LRP11 (Pietzner 2021)	TRUE	TRUE
FNDC1:Q4ZHG4:OID31127	OID31127	Q4ZHG4	FNDC1	0	0	Neurology_II	FNDC1	6	159948149	rs78416661	T	C	C	T	0.294444	450	-0.364812	0.0723072	6.63e-07	6	159590429	159693141	----	NA	FALSE
IGF2R:P11717:OID21146	OID21146	P11717	IGF2R	1	0	Neurology	IGF2R	6	160409894	rs75474551	G	T	T	G	0.112281	570	0.625054	0.0838641	3.47e-13	6	160390131	160534539	IGF2R (Pietzner 2021)	TRUE	TRUE
LPA:P08519:OID30747	OID30747	P08519	LPA	1	0	Inflammation_II	LPA	6	160468180	rs2282137	G	A	A	G	0.0184211	570	0.870937	0.217056	6.82e-05	6	160952515	161087407	LPA (PMID: 27532455)	NA	TRUE
IGF2R:P11717:OID21146	OID21146	P11717	IGF2R	0	0	Neurology	IGF2R	6	160574535	rs650284	C	A	C	A	0.395614	570	-0.322631	0.0551866	8.54e-09	6	160390131	160534539	IGF2R (Pietzner 2021)	TRUE	TRUE
LPA:P08519:OID30747	OID30747	P08519	LPA	0	0	Inflammation_II	LPA	6	160997118	rs74617384	A	T	T	A	0.072807	570	0.658459	0.112682	8.67e-09	6	160952515	161087407	----	NA	FALSE
PLG:P00747:OID30785	OID30785	P00747	PLG	0	0	Inflammation_II	PLG	6	161088918	rs783149	C	A	A	C	0.171958	567	-0.385931	0.0786876	1.23e-06	6	161123270	161174347	PLG (Pietzner 2021)	TRUE	TRUE
RNASET2:O00584:OID20321	OID20321	O00584	RNASET2	1	0	Cardiometabolic	RNASET2	6	167327853	rs7740833	T	C	C	T	0.0620567	564	-0.447675	0.111146	6.41e-05	6	167342992	167370679	RNASET2 (Pietzner 2021)	TRUE	TRUE
RNASET2:O00584:OID20321	OID20321	O00584	RNASET2	0	0	Cardiometabolic	RNASET2	6	167374258	rs62436424	A	G	G	A	0.207381	569	0.454573	0.0651124	8.3e-12	6	167342992	167370679	RNASET2 (Pietzner 2021)	TRUE	TRUE
SMOC2:Q9H3U7:OID20730	OID20730	Q9H3U7	SMOC2	0	0	Inflammation	SMOC2	6	168821727	rs56350469	A	G	G	A	0.272124	452	-0.343954	0.0682855	6.9e-07	6	168841831	169073984	SMOC2 (Pietzner 2021)	TRUE	TRUE
THBS2:P35442:OID21104	OID21104	P35442	THBS2	1	0	Neurology	THBS2	6	169471078	rs9346612	C	A	A	C	0.156733	453	-0.390229	0.0910976	2.26e-05	6	169615875	169654139	THBS2 (Pietzner 2021)	TRUE	TRUE
THBS2:P35442:OID21104	OID21104	P35442	THBS2	0	0	Neurology	THBS2	6	169617889	rs73043837	G	A	A	G	0.122222	450	0.710666	0.102749	1.63e-11	6	169615875	169654139	THBS2 (Emilsson, Pietzner 2021)	TRUE	TRUE
DLL1:O00548:OID21525	OID21525	O00548	DLL1	0	0	Oncology	DLL1	6	170464015	rs3012374	A	G	A	G	0.0995575	452	0.474048	0.104179	6.93e-06	6	170591294	170599561	DLL1 (Pietzner 2021, p=9.04e-4)	FALSE	TRUE
COL28A1:Q2UY09:OID30969	OID30969	Q2UY09	COL28A1	0	0.0803	Neurology_II	COL28A1	7	7586960	rs4724998	G	A	G	A	0.18	450	0.679957	0.0830953	3e-15	7	7395834	7575484	----	FALSE	TRUE
GPNMB:Q14956:OID20173	OID20173	Q14956	GPNMB	0	0	Cardiometabolic	GPNMB	7	23526069	rs67056093	G	A	A	G	0.235088	570	0.329225	0.0680003	1.67e-06	7	23275586	23314727	GPNMB (Pietzner 2021, p=1.28e-7)	TRUE	TRUE
NPY:P01303:OID21388	OID21388	P01303	NPY	0	0	Oncology	NPY	7	24052559	rs80305490	A	G	G	A	0.0396825	567	-0.658167	0.141001	3.82e-06	7	24323782	24331484	----	NA	FALSE
CPVL:Q9H3G5:OID21435	OID21435	Q9H3G5	CPVL	1	0	Oncology	CPVL	7	29055116	rs317694	T	C	C	T	0.405077	453	-0.254538	0.0633048	6.81e-05	7	29034847	29235067	----	FALSE	TRUE
CPVL:Q9H3G5:OID21435	OID21435	Q9H3G5	CPVL	0	0	Oncology	CPVL	7	29184282	rs245870	T	C	C	T	0.387324	568	0.577287	0.0556654	3.63e-23	7	29034847	29235067	----	FALSE	TRUE
FKBP14:Q9NWM8:OID31065	OID31065	Q9NWM8	FKBP14	0	0.0033	Neurology_II	FKBP14	7	29601312	rs1362353	T	A	T	A	0.113687	453	0.457393	0.104681	1.55e-05	7	30050203	30066300	----	FALSE	TRUE
SEPTIN7:Q16181:OID31288	OID31288	Q16181	SEPTIN7	0	0.689	Oncology_II	SEPTIN7	7	36177089	rs2700897	T	G	G	T	0.28208	452	-0.295659	0.0723594	5.21e-05	7	35840542	35944917	----	NA	FALSE
IGFBP3:P17936:OID20398	OID20398	P17936	IGFBP3	0	0	Cardiometabolic	IGFBP3	7	45960645	rs2854746	G	C	C	G	0.342199	564	0.454884	0.0611712	3.95e-13	7	45951949	45961473	IGFBP3 (Pietzner 2021)	TRUE	TRUE
VWC2:Q2TAL6:OID20936	OID20936	Q2TAL6	VWC2	0	0	Neurology	VWC2	7	49818127	rs482968	G	A	A	G	0.444812	453	-0.473106	0.0565057	7.42e-16	7	49813257	49961546	VWC2 (Pietzner 2021)	TRUE	TRUE
DDC:P20711:OID20215	OID20215	P20711	DDC	0	0	Cardiometabolic	DDC	7	50693392	rs17152032	A	G	G	A	0.0167254	568	-1.2591	0.218371	1.34e-08	7	50526134	50633154	DDC (Pietzner 2021)	TRUE	TRUE
EGFR:P00533:OID20319	OID20319	P00533	EGFR	0	0	Cardiometabolic	EGFR	7	55229543	rs3752651	T	C	C	T	0.175439	570	-0.323502	0.0785272	4.37e-05	7	55086714	55324313	----	FALSE	TRUE
CCL24:O00175:OID20772	OID20772	O00175	CCL24	0	0	Inflammation	CCL24	7	75495524	rs757589	T	C	T	C	0.276316	570	0.721919	0.0588884	8.87e-31	7	75440983	75452674	----	FALSE	TRUE
HSPB1:P04792:OID20230	OID20230	P04792	HSPB1	0	0	Cardiometabolic	HSPB1	7	75930759	rs2868371	C	G	G	C	0.266147	449	-0.683916	0.0675844	8.84e-22	7	75931861	75933612	HSPB1 (Emilsson, Pietzner 2021)	TRUE	TRUE
ZP3:P21754:OID30265	OID30265	P21754	ZP3	0	0	Cardiometabolic_II	ZP3	7	76017997	rs10281089	C	T	T	C	0.43819	453	0.911831	0.0550401	2.42e-48	7	76026835	76071388	----	NA	FALSE
ADAM22:Q9P0K1:OID21001	OID21001	Q9P0K1	ADAM22	0	0	Neurology	ADAM22	7	87391761	rs7779623	A	G	A	G	0.441228	570	0.51792	0.0516613	7.19e-22	7	87563458	87832204	ADAM22 (Pietzner 2021)	TRUE	TRUE
PON1:P27169:OID30704	OID30704	P27169	PON1	1	0	Inflammation_II	PON1	7	94384410	rs6465433	C	T	T	C	0.388027	451	-0.287066	0.0679695	2.92e-05	7	94926988	95025673	----	NA	FALSE
PON1:P27169:OID30704	OID30704	P27169	PON1	1	0	Inflammation_II	PON1	7	94937893	rs3917538	G	A	A	G	0.216667	570	0.530225	0.0673984	1.88e-14	7	94926988	95025673	----	NA	FALSE
PON1:P27169:OID30704	OID30704	P27169	PON1	0	0	Inflammation_II	PON1	7	94955528	rs757158	C	T	T	C	0.453427	569	0.648019	0.0511305	1.53e-32	7	94926988	95025673	----	NA	FALSE
PON3:Q15166:OID20777	OID20777	Q15166	PON3	0	0	Inflammation	PON3	7	94983354	rs10953142	C	T	C	T	0.399336	452	0.348373	0.0570317	2.2e-09	7	94989256	95025680	----	NA	FALSE
PON2:Q15165:OID20088	OID20088	Q15165	PON2	0	0.3227	Cardiometabolic	PON2	7	95037661	rs6961624	T	C	C	T	0.254833	569	-0.679326	0.0633642	1.61e-24	7	95034175	95064510	----	NA	FALSE
NPTX2:P47972:OID30390	OID30390	P47972	NPTX2	0	0	Cardiometabolic_II	NPTX2	7	98282745	rs11760352	T	G	T	G	0.275938	453	-0.34686	0.0693746	8.28e-07	7	98246609	98259180	NPTX2 (Pietzner 2021)	TRUE	TRUE
PILRB:Q9UKJ0:OID20197	OID20197	Q9UKJ0	PILRB	1	0	Cardiometabolic	PILRB	7	99469211	rs78884002	T	C	C	T	0.292494	453	-0.346318	0.0690145	7.57e-07	7	99933737	99965356	----	NA	FALSE
PILRB:Q9UKJ0:OID20197	OID20197	Q9UKJ0	PILRB	0	0	Cardiometabolic	PILRB	7	99971834	rs1859788	A	G	A	G	0.304204	452	-0.874072	0.0496106	4.84e-53	7	99933737	99965356	----	NA	TRUE	PILRA (Pietzner 2021)
PILRA:Q9UKJ1:OID21129	OID21129	Q9UKJ1	PILRA	0	0	Neurology	PILRA	7	100366203	rs10232130	C	G	G	C	0.326711	453	0.289071	0.0665679	1.75e-05	7	99965153	99997719	PILRA (Pietzner 2021)	TRUE	TRUE
ACHE:P22303:OID30585	OID30585	P22303	ACHE	0	0	Inflammation_II	ACHE	7	100505792	rs7803865	A	G	G	A	0.461404	570	0.285691	0.0585707	1.4e-06	7	100487615	100494594	ACHE (Emilsson 2018)	TRUE	TRUE
FIS1:Q9Y3D6:OID20722	OID20722	Q9Y3D6	FIS1	0	0	Inflammation	FIS1	7	100870125	rs76238898	T	C	C	T	0.0631929	451	-0.726091	0.132311	6.87e-08	7	100882739	100895597	FIS1 (Pietzner 2021)	TRUE	TRUE
LAMB1:P07942:OID30280	OID30280	P07942	LAMB1	0	0	Cardiometabolic_II	LAMB1	7	107743244	rs408867	C	T	T	C	0.422566	452	-0.484197	0.0629755	9.69e-14	7	107564244	107643700	----	NA	FALSE
NRCAM:Q92823:OID20229	OID20229	Q92823	NRCAM	0	0	Cardiometabolic	NRCAM	7	107961454	rs66526866	G	A	A	G	0.273852	566	0.250523	0.063364	8.69e-05	7	107788068	108097161	NRCAM (Pietzner 2021, p=4.13e-5)	TRUE	TRUE
PTPRZ1:P23471:OID30343	OID30343	P23471	PTPRZ1	0	0	Cardiometabolic_II	PTPRZ1	7	121512949	rs740964	C	T	T	C	0.472406	453	-0.229939	0.0583216	9.36e-05	7	121513143	121702090	----	NA	FALSE
GPR37:O15354:OID20095	OID20095	O15354	GPR37	0	0.0067	Cardiometabolic	GPR37	7	124127173	rs62474126	A	G	G	A	0.220562	569	-0.74135	0.0636464	3.15e-28	7	124386051	124405681	----	NA	FALSE
CPA2:P48052:OID21060	OID21060	P48052	CPA2	0	0	Neurology	CPA2	7	129899592	rs111596183	G	A	A	G	0.242531	569	0.335525	0.0679921	1.06e-06	7	129906667	129929638	----	FALSE	TRUE	CPA4 (Pietzner 2021)
CPA4:Q9UI42:OID30606	OID30606	Q9UI42	CPA4	0	0	Inflammation_II	CPA4	7	129941265	rs3807345	G	A	A	G	0.415929	452	-0.38955	0.0651854	4.7e-09	7	129932974	129964020	CPA4 (Pietzner 2021)	TRUE	TRUE
AKR1B1:P15121:OID21244	OID21244	P15121	AKR1B1	0	0.0033	Oncology	AKR1B1	7	133379599	rs117842280	C	G	G	C	0.037694	451	-0.722495	0.175348	4.52e-05	7	134127102	134144036	----	FALSE	TRUE
TRIM24:O15164:OID31271	OID31271	O15164	TRIM24	0	0.3579	Oncology_II	TRIM24	7	138400858	rs999228	A	C	C	A	0.473684	570	0.239666	0.0573388	3.38e-05	7	138145079	138274738	----	NA	FALSE
TPK1:Q9H3S4:OID30338	OID30338	Q9H3S4	TPK1	0	0	Cardiometabolic_II	TPK1	7	144567926	rs58353754	C	G	G	C	0.33157	567	-0.353647	0.0616058	1.55e-08	7	144149034	144533488	----	FALSE	TRUE
CNTNAP2:Q9UHC6:OID20556	OID20556	Q9UHC6	CNTNAP2	0	0	Inflammation	CNTNAP2	7	145368679	rs6944748	G	C	G	C	0.280624	449	0.551477	0.0713167	7.23e-14	7	145813453	148118090	CNTNAP2 (Pietzner 2021)	TRUE	TRUE
GIMAP7:Q8NHV1:OID30639	OID30639	Q8NHV1	GIMAP7	0	0	Inflammation_II	GIMAP7	7	150248201	rs7455366	G	T	T	G	0.235915	568	-0.528419	0.0656619	5.09e-15	7	150211918	150218161	----	NA	FALSE
DPP6:P42658:OID21354	OID21354	P42658	DPP6	0	0	Oncology	DPP6	7	154686456	rs11981290	G	A	A	G	0.245599	568	0.340571	0.0670873	5.24e-07	7	153584182	154685995	----	NA	FALSE
ESYT2:A0FGR8:OID31134	OID31134	A0FGR8	ESYT2	0	0.0017	Neurology_II	ESYT2	7	158528158	rs3816461	C	G	C	G	0.0458554	567	0.598453	0.138476	1.83e-05	7	158523686	158622944	----	NA	FALSE
DEFA1_DEFA1B:P59665:OID20344	OID20344	P59665	DEFA1B	0	0	Cardiometabolic	DEFA1_DEFA1B	8	6909654	rs9644778	A	C	C	A	0.350993	453	0.360691	0.0637106	2.7e-08	8	6835171	6837602	----	FALSE	TRUE
CTSB:P07858:OID20276	OID20276	P07858	CTSB	0	0	Cardiometabolic	CTSB	8	11705448	rs1692819	G	A	A	G	0.261141	561	0.417703	0.0635523	1.15e-10	8	11700033	11726957	CTSB (Sun, Pietzner 2021)	TRUE	TRUE
MSR1:P21757:OID21063	OID21063	P21757	MSR1	0	0	Neurology	MSR1	8	16053426	rs351581	C	G	G	C	0.0709534	451	-0.474574	0.117477	6.31e-05	8	15965387	16424999	MSR1 (Pietzner 2021)	TRUE	TRUE
ASAH1:Q13510:OID30415	OID30415	Q13510	ASAH1	1	0.005	Cardiometabolic_II	ASAH1	8	17378898	rs1858714	G	T	G	T	0.214602	452	-0.321032	0.0803983	7.64e-05	8	17913934	17942494	----	FALSE	TRUE
FGL1:Q08830:OID30702	OID30702	Q08830	FGL1	0	0	Inflammation_II	FGL1	8	17747433	rs11778309	T	C	T	C	0.303532	453	-0.709615	0.0618456	7.22e-27	8	17721889	17767874	FGL1 (Pietzner 2021)	TRUE	TRUE
ASAH1:Q13510:OID30415	OID30415	Q13510	ASAH1	0	0.005	Cardiometabolic_II	ASAH1	8	17921921	rs2073574	T	C	T	C	0.325704	568	-0.500176	0.05751	3.8e-17	8	17913934	17942494	----	FALSE	TRUE
TNFRSF10B:O14763:OID20981	OID20981	O14763	TNFRSF10B	0	0	Neurology	TNFRSF10B	8	22889058	rs7003706	A	G	A	G	0.0848057	566	-0.586173	0.0893352	1.22e-10	8	22877646	22926692	----	FALSE	TRUE
TNFRSF10C:O14798:OID20265	OID20265	O14798	TNFRSF10C	0	0	Cardiometabolic	TNFRSF10C	8	22944695	rs7830593	G	A	A	G	0.219647	453	0.321924	0.0792399	5.74e-05	8	22941868	22974950	----	NA	FALSE
BNIP3L:O60238:OID30525	OID30525	O60238	BNIP3L	0	0.2174	Inflammation_II	BNIP3L	8	26526449	rs13281659	C	T	C	T	0.439024	451	-0.263005	0.0637277	4.39e-05	8	26240414	26363152	----	FALSE	TRUE
GGH:Q92820:OID20416	OID20416	Q92820	GGH	0	0	Cardiometabolic	GGH	8	63935335	rs12548729	G	A	A	G	0.0850877	570	0.559073	0.0980528	1.92e-08	8	63927638	63951730	GGH (Pietzner 2021)	TRUE	TRUE
CA13:Q8N1Q1:OID20225	OID20225	Q8N1Q1	CA13	0	0	Cardiometabolic	CA13	8	86189699	rs11261469	T	C	T	C	0.353509	570	-0.344229	0.0599107	1.5e-08	8	86132816	86196302	CA13 (Pietzner 2021)	TRUE	TRUE
CNGB3:Q9NQW8:OID30805	OID30805	Q9NQW8	CNGB3	0	0.2809	Neurology_II	CNGB3	8	87779962	rs10100818	T	A	A	T	0.202632	570	-0.299556	0.0725238	4.17e-05	8	87566205	87755903	----	NA	FALSE
CPQ:Q9Y646:OID30406	OID30406	Q9Y646	CPQ	1	0	Cardiometabolic_II	CPQ	8	97726160	rs142439242	A	G	G	A	0.0165929	452	-1.62313	0.240848	4.97e-11	8	97657455	98161882	CPQ (Pietzner 2021)	TRUE	TRUE
CPQ:Q9Y646:OID30406	OID30406	Q9Y646	CPQ	0	0	Cardiometabolic_II	CPQ	8	97975585	rs10087996	A	T	T	A	0.0309051	453	0.750825	0.17786	2.95e-05	8	97657455	98161882	CPQ (Pietzner 2021)	TRUE	TRUE
MATN2:O00339:OID20767	OID20767	O00339	MATN2	0	0	Inflammation	MATN2	8	98991221	rs1869609	A	G	A	G	0.386243	567	-0.373847	0.0556884	4.69e-11	8	98881068	99048944	----	NA	FALSE
SPAG1:Q07617:OID30979	OID30979	Q07617	SPAG1	1	0	Neurology_II	SPAG1	8	101214189	rs2453667	A	G	A	G	0.39273	564	-0.56428	0.0573738	3.78e-21	8	101170134	101271506	----	NA	FALSE
SPAG1:Q07617:OID30979	OID30979	Q07617	SPAG1	0	0	Neurology_II	SPAG1	8	101375117	rs6980889	G	T	T	G	0.318421	570	-0.277609	0.060167	4.9e-06	8	101170134	101271506	----	NA	FALSE
CTHRC1:Q96CG8:OID30393	OID30393	Q96CG8	CTHRC1	0	0	Cardiometabolic_II	CTHRC1	8	104398036	rs11780843	C	A	C	A	0.488914	451	-0.269604	0.0533201	6.27e-07	8	104383743	104395225	----	FALSE	TRUE
TNFRSF11B:O00300:OID20735	OID20735	O00300	TNFRSF11B	1	0	Inflammation	TNFRSF11B	8	119886101	rs3134095	T	C	T	C	0.0709534	451	0.423236	0.106973	8.86e-05	8	119935796	119964439	TNFRSF11B (Pietzner 2021, p=0.0137)	FALSE	TRUE
TNFRSF11B:O00300:OID20735	OID20735	O00300	TNFRSF11B	0	0	Inflammation	TNFRSF11B	8	120187709	rs2468175	A	G	A	G	0.36918	451	-0.295391	0.0574231	4.05e-07	8	119935796	119964439	TNFRSF11B (Pietzner 2021)	TRUE	TRUE
CCN4:O95388:OID21444	OID21444	O95388	CCN4	0	0	Oncology	CCN4	8	134092210	rs2702974	T	C	C	T	0.496485	569	0.387316	0.0539834	2.31e-12	8	134203282	134242587	----	FALSE	TRUE
ST3GAL1:Q11201:OID21322	OID21322	Q11201	ST3GAL1	0	0	Oncology	ST3GAL1	8	134500908	rs11776026	G	A	A	G	0.375276	453	-0.290094	0.0664097	1.56e-05	8	134467091	134584183	----	FALSE	TRUE	ST3GAL4 (Pietzner 2021)
PSCA:O43653:OID31493	OID31493	O43653	PSCA	0	0.2709	Oncology_II	PSCA	8	143766059	rs2585183	C	G	G	C	0.44464	569	0.824582	0.047933	1.47e-53	8	143751726	143764142	----	NA	FALSE
SLURP1:P55000:OID30404	OID30404	P55000	SLURP1	0	0.0201	Cardiometabolic_II	SLURP1	8	143801938	rs2572907	G	A	A	G	0.463252	449	-0.467702	0.0586936	1.39e-14	8	143822362	143823829	----	NA	FALSE
LY6D:Q14210:OID20708	OID20708	Q14210	LY6D	0	0	Inflammation	LY6D	8	143872904	rs2949872	T	C	C	T	0.401549	452	-0.421649	0.063687	1.04e-10	8	143866296	143868008	----	NA	FALSE
GPIHBP1:Q8IV16:OID31469	OID31469	Q8IV16	GPIHBP1	0	0.0017	Oncology_II	GPIHBP1	8	144302179	rs11136272	C	T	T	C	0.43736	447	0.370723	0.0666702	4.68e-08	8	144295068	144299044	----	NA	FALSE
NAPRT:Q6XQN6:OID31114	OID31114	Q6XQN6	NAPRT	0	0.087	Neurology_II	NAPRT	8	144676862	rs9657360	C	T	C	T	0.232892	453	-0.435114	0.0779495	4.15e-08	8	144656955	144660819	----	NA	FALSE
EPPK1:P58107:OID30250	OID30250	P58107	EPPK1	0	0	Cardiometabolic_II	EPPK1	8	144910239	rs4076358	G	A	G	A	0.363316	567	0.314921	0.0579278	8.14e-08	8	144939497	144952632	----	NA	FALSE
CD274:Q9NZQ7:OID20966	OID20966	Q9NZQ7	CD274	0	0	Neurology	CD274	9	5453172	rs822339	A	G	A	G	0.227993	568	-0.370629	0.0661883	3.37e-08	9	5450503	5470566	----	FALSE	TRUE
PDCD1LG2:Q9BQ51:OID21273	OID21273	Q9BQ51	PDCD1LG2	0	0	Oncology	PDCD1LG2	9	5510644	rs16923189	A	G	G	A	0.281579	570	0.434316	0.0641409	3.23e-11	9	5510545	5571282	PDCD1LG2 (Sun, Emilsson, Suhre, Pietzner)	TRUE	TRUE
TYRP1:P17643:OID30517	OID30517	P17643	TYRP1	0	0.1054	Inflammation_II	TYRP1	9	12587983	rs4367651	A	G	A	G	0.175885	452	0.370826	0.0837267	1.19e-05	9	12685439	12710290	----	NA	FALSE
TEK:Q02763:OID21496	OID21496	Q02763	TEK	0	0	Oncology	TEK	9	27183463	rs682632	A	C	A	C	0.0482456	570	0.947163	0.136385	1.05e-11	9	27109139	27230173	TEK (SCALLOP, Sun, 2018, Suhre et al Nat Comms 2017)	TRUE	TRUE
SPINK4:O60575:OID20509	OID20509	O60575	SPINK4	0	0.0134	Inflammation	SPINK4	9	33234650	rs515252	A	T	T	A	0.164811	449	0.895602	0.0745872	6.31e-29	9	33218363	33248565	SPINK4 (Pietzner 2021)	TRUE	TRUE
NUDT2:P50583:OID21308	OID21308	P50583	NUDT2	0	0.5033	Oncology	NUDT2	9	34349232	rs7855864	C	A	C	A	0.309313	451	-0.353101	0.0753867	3.75e-06	9	34329504	34343709	----	FALSE	TRUE
CCL27:Q9Y4X3:OID20121	OID20121	Q9Y4X3	CCL27	0	0	Cardiometabolic	CCL27	9	34655436	rs2812357	T	C	T	C	0.388596	570	0.254552	0.0496727	4.11e-07	9	34661877	34664045	CCL27 (Pietzner 2021, p=0.0010)	FALSE	TRUE
CA9:Q16790:OID21417	OID21417	Q16790	CA9	0	0	Oncology	CA9	9	35837515	rs10814281	G	A	A	G	0.382923	568	0.235219	0.0592859	8.21e-05	9	35673853	35681156	----	FALSE	TRUE
IGFBPL1:Q8WX77:OID20155	OID20155	Q8WX77	IGFBPL1	1	0	Cardiometabolic	IGFBPL1	9	38381639	rs10814685	A	G	G	A	0.279825	570	-0.34758	0.0573852	2.54e-09	9	38408991	38424444	IGFBPL1 (Pietzner 2021)	TRUE	TRUE
IGFBPL1:Q8WX77:OID20155	OID20155	Q8WX77	IGFBPL1	0	0	Cardiometabolic	IGFBPL1	9	38427171	rs927421	C	T	C	T	0.333922	566	-0.458297	0.0537671	1.45e-16	9	38408991	38424444	----	FALSE	TRUE
FXN:Q16595:OID21442	OID21442	Q16595	FXN	0	0	Oncology	FXN	9	71705472	rs7875924	G	A	G	A	0.408688	564	0.23001	0.0579248	8.1e-05	9	71650175	71715094	----	FALSE	TRUE
CEMIP2:Q9UHN6:OID30499	OID30499	Q9UHN6	CEMIP2	0	0.0251	Inflammation_II	CEMIP2	9	74923750	rs1322483	A	G	G	A	0.289823	452	-0.345676	0.0715172	1.85e-06	9	74298282	74431606	----	FALSE	TRUE
GCNT1:Q02742:OID21379	OID21379	Q02742	GCNT1	0	0	Oncology	GCNT1	9	79109205	rs28831475	A	G	G	A	0.179078	564	0.297758	0.0738114	6.25e-05	9	79034752	79122332	----	FALSE	TRUE
ASPN:Q9BXN1:OID30315	OID30315	Q9BXN1	ASPN	0	0.0435	Cardiometabolic_II	ASPN	9	95055429	rs10820966	A	T	T	A	0.324834	451	-0.328796	0.0666506	1.15e-06	9	95218487	95244788	ASPN (Pietzner 2021)	TRUE	TRUE
OGN:P20774:OID21123	OID21123	P20774	OGN	0	0	Neurology	OGN	9	95195858	rs10115290	G	A	A	G	0.321303	568	0.617079	0.0508274	2.87e-30	9	95146249	95166978	OGN (Pietzner 2021)	TRUE	TRUE
PTGR1:Q14914:OID30297	OID30297	Q14914	PTGR1	0	0	Cardiometabolic_II	PTGR1	9	114254865	rs12235990	T	C	C	T	0.0319149	564	-0.963788	0.160863	3.74e-09	9	114312002	114362135	PTGR1 (Pietzner 2021)	TRUE	TRUE
HSDL2:Q6YN16:OID30256	OID30256	Q6YN16	HSDL2	0	0	Cardiometabolic_II	HSDL2	9	115182612	rs4979113	T	C	C	T	0.326316	570	0.649916	0.0587922	7.77e-26	9	115142217	115234690	----	NA	FALSE
TNFSF8:P32971:OID30384	OID30384	P32971	TNFSF8	0	0	Cardiometabolic_II	TNFSF8	9	117693631	rs2075533	G	A	A	G	0.469965	566	-0.433467	0.0555889	3.12e-14	9	117656003	117692697	TNFSF8 (Pietzner 2021)	TRUE	TRUE
MEGF9:Q9H1U4:OID20285	OID20285	Q9H1U4	MEGF9	0	0	Cardiometabolic	MEGF9	9	123788563	rs6478494	T	C	T	C	0.203704	567	-0.275533	0.0682633	6.19e-05	9	123363091	123476748	----	NA	FALSE
ENG:P17813:OID20287	OID20287	P17813	ENG	0	0	Cardiometabolic	ENG	9	130612665	rs12156525	A	C	C	A	0.0884956	452	-0.584862	0.113404	3.78e-07	9	130577291	130617035	ENG (Pietzner 2021)	TRUE	TRUE
HMCN2:Q8NDA2:OID30592	OID30592	Q8NDA2	HMCN2	0	0	Inflammation_II	HMCN2	9	133069741	rs143378550	C	A	A	C	0.0320088	453	0.924756	0.176872	2.64e-07	9	133046882	133309510	----	NA	FALSE
ABO:P16442:OID30675	OID30675	P16442	ABO	1	0.3679	Inflammation_II	ABO	9	136149229	rs505922	T	C	C	T	0.375439	570	1.19639	0.0341406	2.16e-143	9	136125788	136150617	ABO (PMID: 30072576)	TRUE	TRUE
ABO:P16442:OID30675	OID30675	P16442	ABO	0	0.3679	Inflammation_II	ABO	9	136180012	rs516928	G	A	A	G	0.231618	272	0.854865	0.0917808	5.11e-18	9	136125788	136150617	ABO (Emilsson, 2018, Pietzner 2021)	TRUE	TRUE
ADAMTS13:Q76LX8:OID20249	OID20249	Q76LX8	ADAMTS13	0	0	Cardiometabolic	ADAMTS13	9	136314677	rs2301613	C	G	G	C	0.442094	449	0.413909	0.0623516	9.36e-11	9	136279478	136324508	ADAMTS13 (Pietzner 2021)	TRUE	TRUE
DBH:P09172:OID30703	OID30703	P09172	DBH	0	0	Inflammation_II	DBH	9	136504458	rs2519156	T	C	C	T	0.471239	452	0.511391	0.0611385	7.93e-16	9	136501482	136524466	----	NA	FALSE
OBP2B:Q9NPH6:OID20980	OID20980	Q9NPH6	OBP2B	0	0	Neurology	OBP2B	9	136666483	rs2510262	C	T	T	C	0.15	570	0.31422	0.0776163	5.88e-05	9	136080664	136084630	----	FALSE	TRUE
FCN2:Q15485:OID20382	OID20382	Q15485	FCN2	0	0	Cardiometabolic	FCN2	9	137776054	rs7041446	G	A	A	G	0.488889	450	-0.489331	0.0640579	1.38e-13	9	137772654	137779924	FCN2 (Pietzner 2021)	TRUE	TRUE
FCN1:O00602:OID30690	OID30690	O00602	FCN1	0	0.0017	Inflammation_II	FCN1	9	137848020	rs12554353	C	T	T	C	0.334806	566	0.321783	0.0612183	2.1e-07	9	137801431	137809809	FCN1 (Pietzner 2021)	TRUE	TRUE
ENTR1:Q96C92:OID30231	OID30231	Q96C92	ENTR1	0	0	Cardiometabolic_II	ENTR1	9	139273790	rs3812568	C	A	A	C	0.161092	568	-0.390437	0.0780465	7.59e-07	9	139296377	139305061	----	NA	FALSE
LCN15:Q6UWW0:OID31032	OID31032	Q6UWW0	LCN15	0	0.0017	Neurology_II	LCN15	9	139658576	rs4880140	G	C	G	C	0.226269	453	-0.437324	0.0761962	1.76e-08	9	139654086	139660707	----	NA	FALSE
PTGDS:P41222:OID20408	OID20408	P41222	PTGDS	0	0	Cardiometabolic	PTGDS	9	139857958	rs11145949	A	G	A	G	0.483126	563	-0.248412	0.0543333	5.96e-06	9	139871956	139879887	PTGDS (Pietzner 2021)	TRUE	TRUE
IL15RA:Q13261:OID20498	OID20498	Q13261	IL15RA	0	0.2525	Inflammation	IL15RA	10	6017676	rs1977263	A	G	A	G	0.0289474	570	-0.741167	0.169261	1.42e-05	10	5990855	6020150	IL15RA (Pietzner 2021)	TRUE	TRUE
IL2RA:P01589:OID20267	OID20267	P01589	IL2RA	0	0	Cardiometabolic	IL2RA	10	6107265	rs3118475	T	C	C	T	0.214789	568	-0.40596	0.0671658	2.75e-09	10	6052652	6104288	IL2RA (Pietzner 2021, p=0.0016)	FALSE	TRUE
CDNF:Q49AH0:OID21318	OID21318	Q49AH0	CDNF	0	0	Oncology	CDNF	10	14904654	rs11814337	A	G	G	A	0.109155	568	0.423972	0.0924029	5.52e-06	10	14861249	14880574	CDNF (Pietzner 2021)	TRUE	TRUE
NRP1:O14786:OID20390	OID20390	O14786	NRP1	0	0	Cardiometabolic	NRP1	10	33477430	rs2506148	G	C	C	G	0.357143	567	-0.421028	0.0582903	1.68e-12	10	33466420	33625190	NRP1 (Pietzner 2021)	TRUE	TRUE
MSMB:P08118:OID20275	OID20275	P08118	MSMB	0	0.0017	Cardiometabolic	MSMB	10	51516299	rs2843556	G	T	G	T	0.434629	566	0.38742	0.057532	4.12e-11	10	51549498	51562517	MSMB (Pietzner 2021)	TRUE	TRUE
ASAH2:Q9NR71:OID20996	OID20996	Q9NR71	ASAH2	0	0	Neurology	ASAH2	10	52017680	rs2813299	G	A	G	A	0.197339	451	-0.627719	0.0744903	5.04e-16	10	51942538	52008370	ASAH2 (Pietzner 2021)	TRUE	TRUE
MBL2:P11226:OID30759	OID30759	P11226	MBL2	0	0.0017	Inflammation_II	MBL2	10	54506266	rs72792746	T	C	C	T	0.130088	565	-0.828181	0.0829661	1.07e-21	10	54525140	54531460	MBL2 (Pietzner 2021)	TRUE	TRUE
PBLD:P30039:OID20839	OID20839	P30039	PBLD	0	0.4682	Neurology	PBLD	10	70056335	rs7912806	A	C	A	C	0.236842	570	0.599674	0.061916	1.29e-20	10	70042417	70092806	----	NA	FALSE
CDH23:Q9H251:OID31074	OID31074	Q9H251	CDH23	0	0.3946	Neurology_II	CDH23	10	73469442	rs7072160	A	G	G	A	0.19386	570	-0.351879	0.0712906	1.05e-06	10	73156691	73575702	----	NA	FALSE
PSAP:P07602:OID30419	OID30419	P07602	PSAP	0	0	Cardiometabolic_II	PSAP	10	73496231	rs181226894	G	A	A	G	0.0110375	453	1.14039	0.284705	7.25e-05	10	73576055	73611126	PSAP (PMID: 30072576, Pietzner 2021)	TRUE	TRUE
VSIR:Q9H7M9:OID20131	OID20131	Q9H7M9	VSIR	0	0	Cardiometabolic	VSIR	10	73530235	rs12415873	C	T	T	C	0.143805	452	0.400409	0.0902233	1.15e-05	10	73507316	73533255	VSIR (Pietzner 2021)	TRUE	TRUE
SFTPA2:Q8IWL1:OID21218	OID21218	Q8IWL1	SFTPA2	0	0.2074	Oncology	SFTPA2	10	81702722	rs1998374	T	C	C	T	0.094523	566	0.620424	0.0963209	2.56e-10	10	81315608	81320153	----	NA	TRUE	SFTPD (Pietzner 2021)
SFTPD:P35247:OID20214	OID20214	P35247	SFTPD	0	0	Cardiometabolic	SFTPD	10	81706324	rs721917	A	G	G	A	0.413158	570	-0.71213	0.0517062	2.2e-37	10	81697496	81742370	SFTPD (Pietzner 2021)	TRUE	TRUE
SNCG:O76070:OID20971	OID20971	O76070	SNCG	1	0	Neurology	SNCG	10	88725984	rs1240390	A	G	A	G	0.224868	567	-0.789903	0.0549047	3.83e-40	10	88718375	88723017	----	NA	FALSE
SNCG:O76070:OID20971	OID20971	O76070	SNCG	0	0	Neurology	SNCG	10	88972835	rs150077088	A	T	T	A	0.216912	272	-0.545136	0.0951075	2.72e-08	10	88718375	88723017	----	NA	FALSE
LIPF:P07098:OID30266	OID30266	P07098	LIPF	0	0	Cardiometabolic_II	LIPF	10	90536449	rs303480	A	G	G	A	0.223592	568	-0.337371	0.068815	1.24e-06	10	90424198	90438571	----	NA	TRUE	LIPN (Pietzner 2021)
FAS:P25445:OID20316	OID20316	P25445	FAS	0	0	Cardiometabolic	FAS	10	90851819	rs11202972	A	G	G	A	0.109842	569	0.373556	0.0869407	2.04e-05	10	90750414	90775542	FAS (Pietzner 2021, p=0.0034)	FALSE	TRUE
FGFBP3:Q8TAT2:OID31108	OID31108	Q8TAT2	FGFBP3	0	0	Neurology_II	FGFBP3	10	93673004	rs7095552	G	A	A	G	0.232456	570	-0.464484	0.0642294	1.57e-12	10	93666346	93669240	FGFBP3 (Pietzner 2021)	TRUE	TRUE
TCTN3:Q6NUS6:OID30326	OID30326	Q6NUS6	TCTN3	0	0	Cardiometabolic_II	TCTN3	10	97505278	rs1891535	C	T	T	C	0.378587	453	0.652075	0.0550896	2.77e-28	10	97423158	97453900	----	NA	FALSE
CRTAC1:Q9NQ79:OID20279	OID20279	Q9NQ79	CRTAC1	0	0	Cardiometabolic	CRTAC1	10	99640811	rs10883011	C	T	T	C	0.223986	567	0.327199	0.0639646	4.31e-07	10	99624757	99790585	CRTAC1 (Pietzner 2021)	TRUE	TRUE
GFRA1:P56159:OID21457	OID21457	P56159	GFRA1	0	0	Oncology	GFRA1	10	118001771	rs11197603	T	C	C	T	0.130531	452	-0.349757	0.0852919	4.9e-05	10	117816444	118032979	GFRA1 (Pietzner 2021)	TRUE	TRUE
LHPP:Q9H008:OID20749	OID20749	Q9H008	LHPP	0	0	Inflammation	LHPP	10	126164319	rs12784000	A	G	G	A	0.421286	451	0.367314	0.0612297	4.14e-09	10	126150403	126306457	----	NA	FALSE
UROS:P10746:OID30964	OID30964	P10746	UROS	0	0.4649	Neurology_II	UROS	10	128133901	rs145491567	A	G	G	A	0.0287611	452	0.778533	0.182193	2.36e-05	10	127477146	127511817	----	FALSE	TRUE
MGMT:P16455:OID20588	OID20588	P16455	MGMT	0	0	Inflammation	MGMT	10	131303513	rs1762416	A	G	A	G	0.338313	569	-0.400287	0.0595842	4.54e-11	10	131265448	131566271	----	NA	FALSE
PRAP1:Q96NZ9:OID30391	OID30391	Q96NZ9	PRAP1	0	0	Cardiometabolic_II	PRAP1	10	135198184	rs73389490	A	G	G	A	0.0155211	451	-0.989421	0.235667	3.25e-05	10	135160650	135166187	----	NA	FALSE
SMPD1:P17405:OID21028	OID21028	P17405	SMPD1	0	0	Neurology	SMPD1	11	6409985	rs2723660	A	G	G	A	0.342527	562	-0.246554	0.0599488	4.5e-05	11	6411655	6416228	SMPD1 (Pietzner 2021)	TRUE	TRUE
DKK3:Q9UBP4:OID20264	OID20264	Q9UBP4	DKK3	1	0	Cardiometabolic	DKK3	11	11976628	rs7933089	G	A	G	A	0.394876	566	-0.233834	0.0553619	2.81e-05	11	11984653	12031316	DKK3 (Pietzner 2021, p=1.17e-4)	FALSE	TRUE
DKK3:Q9UBP4:OID20264	OID20264	Q9UBP4	DKK3	0	0	Cardiometabolic	DKK3	11	12042364	rs113243780	G	A	A	G	0.0811287	567	-0.455258	0.0953015	2.28e-06	11	11984653	12031316	DKK3 (Pietzner 2021)	TRUE	TRUE
CALCB:P10092:OID31100	OID31100	P10092	CALCB	0	0	Neurology_II	CALCB	11	13958982	rs142023253	G	A	A	G	0.117257	452	0.392298	0.0976232	6.88e-05	11	14926543	15103888	----	FALSE	TRUE
SPON1:Q9HCB6:OID20759	OID20759	Q9HCB6	SPON1	0	0	Inflammation	SPON1	11	14021639	rs2618516	T	C	T	C	0.345475	453	0.384413	0.0593797	2.53e-10	11	13984270	14289679	SPON1 (Pietzner 2021)	TRUE	TRUE
NUCB2:P80303:OID21448	OID21448	P80303	NUCB2	0	0	Oncology	NUCB2	11	17125168	rs11024158	G	A	A	G	0.449227	453	0.535788	0.0580279	1.08e-18	11	17229700	17371521	----	NA	FALSE
NCR3LG1:Q68D85:OID31490	OID31490	Q68D85	NCR3LG1	0	0	Oncology_II	NCR3LG1	11	17384498	rs12146443	T	C	T	C	0.400662	453	-0.418358	0.0675964	1.38e-09	11	17373273	17398888	----	FALSE	TRUE
SAA4:P35542:OID30726	OID30726	P35542	SAA4	0	0.0268	Inflammation_II	SAA4	11	18228858	rs10832904	G	A	A	G	0.332222	450	-0.31974	0.070488	7.4e-06	11	18252896	18258440	SAA4 (Pietzner 2021)	TRUE	TRUE
NELL1:Q92832:OID21494	OID21494	Q92832	NELL1	0	0	Oncology	NELL1	11	20301060	rs72929181	T	C	C	T	0.0243363	452	0.951204	0.211347	8.67e-06	11	20691117	21597227	----	FALSE	TRUE
FSHB:P01225:OID30233	OID30233	P01225	FSHB	0	0.087	Cardiometabolic_II	FSHB	11	30215261	rs11031002	T	A	A	T	0.139965	568	-0.299608	0.0703998	2.44e-05	11	30252563	30256808	FSHB (Pietzner 2021)	TRUE	TRUE
CD59:P13987:OID20339	OID20339	P13987	CD59	0	0	Cardiometabolic	CD59	11	33757770	rs2273121	G	A	A	G	0.220621	451	-0.264735	0.0664587	7.94e-05	11	33719807	33757991	CD59 (Sun 2018, Pietzner 2021)	TRUE	TRUE
PAMR1:Q6UXH9:OID21153	OID21153	Q6UXH9	PAMR1	1	0	Neurology	PAMR1	11	35453717	rs1048193	C	G	G	C	0.144124	451	-0.339495	0.0829917	5.11e-05	11	35453370	35551848	----	NA	FALSE
PAMR1:Q6UXH9:OID21153	OID21153	Q6UXH9	PAMR1	0	0	Neurology	PAMR1	11	35574891	rs36063975	C	T	T	C	0.178383	569	-0.390689	0.0686183	2.01e-08	11	35453370	35551848	----	NA	FALSE
F2:P00734:OID30723	OID30723	P00734	F2	0	0.0017	Inflammation_II	F2	11	47443594	rs7925299	G	C	G	C	0.315265	452	-0.286268	0.0684752	3.51e-05	11	46740730	46761056	F2 (Pietzner 2021, p=0.0082)	FALSE	TRUE
UBE2L6:O14933:OID30321	OID30321	O14933	UBE2L6	0	0	Cardiometabolic_II	UBE2L6	11	56814052	rs595329	A	G	A	G	0.38	450	-0.260405	0.0655675	8.34e-05	11	57319129	57335757	----	NA	FALSE
CD6:P30203:OID20649	OID20649	P30203	CD6	0	0	Inflammation	CD6	11	60776209	rs11230563	C	T	T	C	0.349123	570	-0.703586	0.0533746	9.27e-35	11	60739115	60787849	----	NA	FALSE
ASRGL1:Q7L266:OID30283	OID30283	Q7L266	ASRGL1	0	0	Cardiometabolic_II	ASRGL1	11	62094894	rs4963295	C	T	T	C	0.275709	564	-0.332919	0.0636623	2.41e-07	11	62104920	62160882	ASRGL1 (Pietzner 2021)	TRUE	TRUE
AHNAK:Q09666:OID30260	OID30260	Q09666	AHNAK	0	0	Cardiometabolic_II	AHNAK	11	62805370	rs12365174	G	A	A	G	0.159645	451	0.358987	0.0881464	5.51e-05	11	62201016	62323707	----	NA	FALSE
VEGFB:P49765:OID30554	OID30554	P49765	VEGFB	0	0	Inflammation_II	VEGFB	11	63821817	rs7103551	A	G	G	A	0.0777778	450	-0.527737	0.120169	1.41e-05	11	64002010	64006259	----	FALSE	TRUE
GPHA2:Q96T91:OID31437	OID31437	Q96T91	GPHA2	0	0.0201	Oncology_II	GPHA2	11	64772545	rs7103328	T	C	C	T	0.0324561	570	0.714157	0.164892	1.76e-05	11	64701943	64703360	----	FALSE	TRUE
SNX15:Q9NRS6:OID30644	OID30644	Q9NRS6	SNX15	0	0.0017	Inflammation_II	SNX15	11	64797563	rs112978052	G	T	T	G	0.0573951	453	-0.734501	0.134117	7.27e-08	11	64794880	64808044	----	NA	FALSE
LTBP3:Q9NS15:OID21191	OID21191	Q9NS15	LTBP3	0	0	Oncology	LTBP3	11	65324276	rs11227223	C	T	T	C	0.0532151	451	0.815615	0.145819	3.91e-08	11	65306276	65326401	----	NA	FALSE
B4GAT1:O43505:OID21127	OID21127	O43505	B4GAT1	0	0	Neurology	B4GAT1	11	66080770	rs7924580	C	T	T	C	0.229581	453	-0.282729	0.0719959	9.97e-05	11	66112843	66115163	----	NA	FALSE
GSTP1:P09211:OID20876	OID20876	P09211	GSTP1	0	0.5786	Neurology	GSTP1	11	67246757	rs11227805	C	T	T	C	0.133554	453	-0.443552	0.0942976	3.42e-06	11	67351066	67354131	GSTP1 (Pietzner 2021, p=1.49e-4)	FALSE	TRUE
IGHMBP2:P38935:OID30123	OID30123	P38935	IGHMBP2	0	0.3478	Cardiometabolic_II	IGHMBP2	11	68397316	rs2513286	A	G	G	A	0.15708	452	-0.366803	0.0921415	8.02e-05	11	68671310	68708070	----	NA	FALSE
FOLR3:P41439:OID21485	OID21485	P41439	FOLR3	0	0	Oncology	FOLR3	11	71863733	rs77508077	C	A	A	C	0.0946548	449	1.27838	0.094249	2.92e-35	11	71825915	71850936	FOLR3 (Pietzner 2021)	TRUE	TRUE
RELT:Q969Z4:OID21142	OID21142	Q969Z4	RELT	0	0	Neurology	RELT	11	73106237	rs11544311	A	C	C	A	0.129139	453	0.546511	0.0864183	6.22e-10	11	73087309	73108519	RELT (Pietzner 2021, p=2.25e-7)	TRUE	TRUE
AAMDC:Q9H7C9:OID30236	OID30236	Q9H7C9	AAMDC	0	0.0184	Cardiometabolic_II	AAMDC	11	77599576	rs9667816	T	C	C	T	0.115894	453	-0.897861	0.0941206	9.6e-20	11	77532155	77629478	----	NA	FALSE
CTSC:P53634:OID20679	OID20679	P53634	CTSC	0	0	Inflammation	CTSC	11	88082392	rs72966871	G	A	A	G	0.0838852	453	0.886905	0.103609	1.86e-16	11	88026760	88070955	CTSC (Emilsson 2018)	TRUE	TRUE
CNTN5:O94779:OID21006	OID21006	O94779	CNTN5	0	0	Neurology	CNTN5	11	99066241	rs961168	C	T	C	T	0.0799649	569	0.797504	0.0945114	2.76e-16	11	98891683	100229616	CNTN5 (Pietzner 2021)	TRUE	TRUE
MMP7:P09237:OID20087	OID20087	P09237	MMP7	0	0	Cardiometabolic	MMP7	11	102430005	rs68181448	G	A	A	G	0.206402	453	-0.328478	0.0760623	1.94e-05	11	102391239	102401484	MMP7 (Pietzner 2021)	TRUE	TRUE
MMP10:P09238:OID20687	OID20687	P09238	MMP10	0	0	Inflammation	MMP10	11	102470256	rs10895322	A	G	G	A	0.0772627	453	-0.511062	0.125357	5.41e-05	11	102641234	102651359	MMP10 (Pietzner 2021, p=1.78E-07)	TRUE	TRUE
MMP1:P03956:OID20672	OID20672	P03956	MMP1	0	0	Inflammation	MMP1	11	102675489	rs519806	A	G	G	A	0.401754	570	-0.26866	0.0602164	9.83e-06	11	102660651	102668891	MMP1 (Pietzner 2021)	TRUE	TRUE
MMP3:P08254:OID21083	OID21083	P08254	MMP3	0	0	Neurology	MMP3	11	102713465	rs602128	A	G	A	G	0.418987	395	-0.492722	0.0768958	4.31e-10	11	102706532	102714534	MMP3 (Sun 2018)	TRUE	TRUE
MMP12:P39900:OID21439	OID21439	P39900	MMP12	0	0	Oncology	MMP12	11	102773998	rs72983568	T	G	G	T	0.167038	449	-0.451471	0.0775409	1.12e-08	11	102733467	102745765	MMP12 (Pietzner 2021)	TRUE	TRUE
MMP8:P22894:OID21019	OID21019	P22894	MMP8	0	0	Neurology	MMP8	11	103375225	rs28825784	A	C	C	A	0.0916115	453	-0.49448	0.106377	4.42e-06	11	102582526	102597781	MMP8 (Pietzner 2021, p=8.70E-06)	TRUE	TRUE
LAYN:Q6UX15:OID20970	OID20970	Q6UX15	LAYN	0	0	Neurology	LAYN	11	111424716	rs518294	A	T	A	T	0.387719	570	-0.213978	0.0535523	7.31e-05	11	111411005	111432264	LAYN (Pitzner 2021)	TRUE	TRUE
IL18:Q14116:OID20694	OID20694	Q14116	IL18	0	0	Inflammation	IL18	11	112385822	rs12574647	G	A	A	G	0.0880282	568	-0.417104	0.103735	6.59e-05	11	112013974	112034840	----	FALSE	TRUE
TMPRSS5:Q9H3S3:OID20947	OID20947	Q9H3S3	TMPRSS5	0	0	Neurology	TMPRSS5	11	113561054	rs7110736	A	G	A	G	0.360281	569	-0.764217	0.0496473	7.63e-45	11	113558272	113577095	TMPRSS5 (Pietzner 2021, p = 3.25E-04)	FALSE	TRUE
PCSK7:Q16549:OID31410	OID31410	Q16549	PCSK7	0	0.0134	Oncology_II	PCSK7	11	117081763	rs171052	C	G	G	C	0.227915	566	-0.304432	0.0690115	1.23e-05	11	117075053	117103241	PCSK7 (Pietzner 2021)	TRUE	TRUE
SCN4B:Q8IWT1:OID30277	OID30277	Q8IWT1	SCN4B	0	0	Cardiometabolic_II	SCN4B	11	118017434	rs1793157	C	A	C	A	0.421239	565	0.395543	0.0585375	3.56e-11	11	118004092	118023603	----	FALSE	TRUE
TREH:O43280:OID30388	OID30388	O43280	TREH	0	0.0017	Cardiometabolic_II	TREH	11	118572021	rs657539	C	T	T	C	0.334437	453	0.827197	0.0551234	1.82e-41	11	118528026	118550399	----	NA	FALSE
THY1:P04216:OID21050	OID21050	P04216	THY1	0	0	Neurology	THY1	11	119337504	rs10750144	A	G	A	G	0.321111	450	0.359535	0.0637115	2.99e-08	11	119288090	119295695	----	NA	FALSE
ARHGEF12:Q9NZN5:OID20554	OID20554	Q9NZN5	ARHGEF12	0	0.0184	Inflammation	ARHGEF12	11	120100520	rs3225	C	G	C	G	0.175885	452	0.363089	0.0853983	2.59e-05	11	120207787	120360645	----	NA	FALSE
CLMP:Q9H6B4:OID21419	OID21419	Q9H6B4	CLMP	0	0	Oncology	CLMP	11	123066335	rs4282989	C	T	C	T	0.322124	565	-0.320745	0.0510888	6.91e-10	11	122943035	123065989	CLMP (Pietzner 2021)	TRUE	TRUE
ADAMTS8:Q9UP79:OID21502	OID21502	Q9UP79	ADAMTS8	0	0	Oncology	ADAMTS8	11	130269802	rs61526391	G	T	G	T	0.424444	450	-0.394417	0.0632122	1.03e-09	11	130274820	130298888	----	NA	FALSE
FGF23:Q9GZV9:OID21411	OID21411	Q9GZV9	FGF23	0	0	Oncology	FGF23	12	4487391	rs17700494	G	T	T	G	0.0324561	570	0.636577	0.16049	8.24e-05	12	4477393	4488894	----	FALSE	TRUE
CRACR2A:Q9BSW2:OID21249	OID21249	Q9BSW2	CRACR2A	0	0.0903	Oncology	CRACR2A	12	4802572	rs145469717	C	T	T	C	0.0289982	569	-0.754758	0.174708	1.85e-05	12	3715799	3873985	----	NA	FALSE
C1R:P00736:OID30753	OID30753	P00736	C1R	0	0	Inflammation_II	C1R	12	7170336	rs12146727	G	A	A	G	0.14745	451	-0.593033	0.0856055	1.52e-11	12	7187513	7245203	C1R (Suhre 2017, Pietzner 2021)	TRUE	TRUE
CLSTN3:Q9BQT9:OID31092	OID31092	Q9BQT9	CLSTN3	0	0	Neurology_II	CLSTN3	12	7262024	rs3782925	C	T	T	C	0.351441	451	-0.416704	0.0683966	2.42e-09	12	7282294	7311541	----	FALSE	TRUE
C1RL:Q9NZP8:OID30721	OID30721	Q9NZP8	C1RL	0	0	Inflammation_II	C1RL	12	7298205	rs17198514	A	C	C	A	0.089404	453	-0.468284	0.107406	1.62e-05	12	7242183	7261869	C1RL (Pietzner 2021)	TRUE	TRUE
RBP5:P82980:OID21369	OID21369	P82980	RBP5	0	0	Oncology	RBP5	12	7306781	rs3782922	C	A	A	C	0.0890653	567	-0.394103	0.0958726	4.54e-05	12	7276280	7281538	RBP5 (Pietzner 2021)	TRUE	TRUE
CLEC4C:Q8WTT0:OID20547	OID20547	Q8WTT0	CLEC4C	0	0	Inflammation	CLEC4C	12	7912675	rs12310416	A	G	G	A	0.39404	453	0.740389	0.0558575	5.07e-34	12	7882011	7904201	CLEC4C (Pietzner 2021)	TRUE	TRUE
CLEC6A:Q6EIG7:OID21228	OID21228	Q6EIG7	CLEC6A	0	0.0033	Oncology	CLEC6A	12	8642717	rs10734713	C	T	C	T	0.132689	569	-0.472658	0.086505	7.02e-08	12	8608522	8630926	----	FALSE	TRUE
CLEC4D:Q8WXI8:OID20609	OID20609	Q8WXI8	CLEC4D	0	0	Inflammation	CLEC4D	12	8683721	rs12302046	A	C	C	A	0.264912	570	0.493799	0.061062	3.8e-15	12	8662071	8674962	----	FALSE	TRUE
PZP:P20742:OID30730	OID30730	P20742	PZP	0	0.0251	Inflammation_II	PZP	12	9362931	rs1017301	C	A	C	A	0.316667	570	-0.480446	0.0601484	7.84e-15	12	9301436	9360966	PZP (Pietzner 2021)	TRUE	TRUE
CLEC12A:Q5QGZ9:OID30552	OID30552	Q5QGZ9	CLEC12A	0	0.1054	Inflammation_II	CLEC12A	12	10109648	rs7302029	T	C	C	T	0.261989	563	0.56447	0.0609345	4.33e-19	12	10103915	10148293	CLEC12A (Pietzner 2021)	TRUE	TRUE
CLEC1B:Q9P126:OID21061	OID21061	Q9P126	CLEC1B	0	0	Neurology	CLEC1B	12	10146707	rs544605	T	C	C	T	0.271053	570	0.281727	0.0656369	2.08e-05	12	10138241	10166023	CLEC1B (Emilsson, Pitzner 2021)	TRUE	TRUE
CLEC1A:Q8NC01:OID20099	OID20099	Q8NC01	CLEC1A	0	0	Cardiometabolic	CLEC1A	12	10231393	rs11053573	C	T	T	C	0.239514	453	0.437422	0.072438	3.29e-09	12	10222153	10264226	----	NA	FALSE
CLEC7A:Q9BXN2:OID20636	OID20636	Q9BXN2	CLEC7A	0	0.0117	Inflammation	CLEC7A	12	10271087	rs16910526	A	C	C	A	0.084989	453	-0.926334	0.102997	6.97e-18	12	10269376	10282857	----	FALSE	TRUE
KLRD1:Q13241:OID20632	OID20632	Q13241	KLRD1	0	0	Inflammation	KLRD1	12	10393535	rs10845081	C	T	C	T	0.318985	453	0.366867	0.0663535	5.51e-08	12	10378657	10469850	----	NA	FALSE
KLRK1:P26718:OID31082	OID31082	P26718	KLRK1	0	0	Neurology_II	KLRK1	12	10526538	rs2086099	G	A	G	A	0.297566	452	0.528022	0.0703543	3.4e-13	12	10524952	10544473	----	FALSE	TRUE
BCAT1:P54687:OID30312	OID30312	P54687	BCAT1	0	0.0017	Cardiometabolic_II	BCAT1	12	24967033	rs2353482	G	A	G	A	0.257951	566	-0.309991	0.0636154	1.44e-06	12	24964295	25102393	----	NA	FALSE
MANSC4:A6NHS7:OID30141	OID30141	A6NHS7	MANSC4	0	0.7492	Cardiometabolic_II	MANSC4	12	27921101	rs61915419	G	A	A	G	0.231579	570	0.689521	0.0609344	6.99e-27	12	27915671	27924209	MANSC4 (Pietzner 2021)	TRUE	TRUE
CNTN1:Q12860:OID20307	OID20307	Q12860	CNTN1	1	0	Cardiometabolic	CNTN1	12	41032864	rs11177560	T	C	C	T	0.404656	451	0.299724	0.0690599	1.77e-05	12	41086244	41466220	CNTN1 (Pietzner 2021)	TRUE	TRUE
CNTN1:Q12860:OID20307	OID20307	Q12860	CNTN1	0	0	Cardiometabolic	CNTN1	12	41184819	rs11178389	T	A	A	T	0.339956	453	0.3317	0.0659362	7.11e-07	12	41086244	41466220	CNTN1 (Pietzner 2021)	TRUE	TRUE
ENDOU:P21128:OID31498	OID31498	P21128	ENDOU	0	0	Oncology_II	ENDOU	12	48115997	rs7976748	G	C	C	G	0.268889	450	0.309177	0.0721164	2.22e-05	12	48103517	48119350	----	FALSE	TRUE
COL2A1:P02458:OID30286	OID30286	P02458	COL2A1	0	0	Cardiometabolic_II	COL2A1	12	48422489	rs2408954	G	A	A	G	0.258348	569	-0.553105	0.0630048	2e-17	12	48366748	48398269	----	FALSE	TRUE
BIN2:Q9UBW5:OID21067	OID21067	Q9UBW5	BIN2	0	0.0301	Neurology	BIN2	12	51446570	rs35713963	A	T	A	T	0.601545	453	0.356363	0.0856802	3.83e-05	12	51674822	51718452	----	NA	FALSE
ACVRL1:P37023:OID20999	OID20999	P37023	ACVRL1	0	0	Neurology	ACVRL1	12	52318624	rs78197611	C	T	T	C	0.096831	568	0.478659	0.0901385	1.58e-07	12	52300692	52317145	----	FALSE	TRUE
KRT8:P05787:OID30865	OID30865	P05787	KRT8	0	0.7458	Neurology_II	KRT8	12	52349943	rs61914044	G	T	T	G	0.0287611	452	0.724771	0.181468	7.61e-05	12	53290977	53343738	----	NA	FALSE
KRT18:P05783:OID21296	OID21296	P05783	KRT18	0	0	Oncology	KRT18	12	53101668	rs673127	A	G	A	G	0.14805	564	-0.386645	0.0833916	4.42e-06	12	53342655	53346685	----	NA	FALSE
PCBP2:Q15366:OID31003	OID31003	Q15366	PCBP2	0	0.0033	Neurology_II	PCBP2	12	54287161	rs2577864	C	T	T	C	0.39311	566	-0.250618	0.0621069	6.22e-05	12	53835525	53874946	----	NA	FALSE
INHBC:P55103:OID21093	OID21093	P55103	INHBC	0	0	Neurology	INHBC	12	57826982	rs73119306	A	G	G	A	0.262749	451	-0.492156	0.064047	1e-13	12	57828543	57844611	INHBC (Pietzner 2021)	TRUE	TRUE
DTX3:Q8N9I9:OID21349	OID21349	Q8N9I9	DTX3	0	0	Oncology	DTX3	12	57976118	rs11172256	A	G	G	A	0.256637	452	-0.273302	0.0694798	9.71e-05	12	57998405	58003587	----	NA	FALSE
WIF1:Q9Y5W5:OID21464	OID21464	Q9Y5W5	WIF1	0	0	Oncology	WIF1	12	65321920	rs569525	T	A	A	T	0.492945	567	-0.269571	0.0571101	2.98e-06	12	65444406	65515346	WIF1 (Pietzner 2021)	TRUE	TRUE
CPM:P14384:OID21054	OID21054	P14384	CPM	0	0	Neurology	CPM	12	69752758	rs73151644	G	A	A	G	0.0110865	451	-1.16253	0.273569	2.61e-05	12	69235977	69365350	----	FALSE	TRUE
PTPRB:P23467:OID30324	OID30324	P23467	PTPRB	0	0	Cardiometabolic_II	PTPRB	12	70974636	rs2584011	C	A	A	C	0.273897	272	0.553345	0.0887715	1.81e-09	12	70910630	71031220	----	NA	FALSE
GLIPR1:P48060:OID31517	OID31517	P48060	GLIPR1	0	0	Oncology_II	GLIPR1	12	75874913	rs2242435	G	A	A	G	0.40757	568	-0.237729	0.0590321	6.43e-05	12	75874460	75897633	GLIPR1 (Pietzner 2021, p=7.96e-6)	TRUE	TRUE
STAB2:Q8WWQ8:OID30401	OID30401	Q8WWQ8	STAB2	0	0	Cardiometabolic_II	STAB2	12	104066832	rs73396019	C	T	T	C	0.0555556	567	0.764833	0.116912	1.38e-10	12	103981051	104160505	----	FALSE	TRUE
VSIG10:Q8N0Z9:OID31400	OID31400	Q8N0Z9	VSIG10	0	0.0217	Oncology_II	VSIG10	12	118502467	rs8239	A	G	G	A	0.15011	453	0.551692	0.0909676	2.83e-09	12	118501398	118573831	----	FALSE	TRUE
ADGRD1:Q6QNK2:OID30588	OID30588	Q6QNK2	ADGRD1	0	0	Inflammation_II	ADGRD1	12	131503286	rs1727342	G	A	G	A	0.244718	568	0.342256	0.0628421	7.72e-08	12	131438452	131626014	----	NA	FALSE
IL17D:Q8TAD2:OID20481	OID20481	Q8TAD2	IL17D	0	0	Inflammation	IL17D	13	21304084	rs9509356	G	A	G	A	0.49115	565	0.336605	0.0492682	2.2e-11	13	21276266	21297237	IL17D (Pitzner 2021, p=0.0399)	FALSE	TRUE
TNFRSF19:Q9NS68:OID21446	OID21446	Q9NS68	TNFRSF19	0	0	Oncology	TNFRSF19	13	24182550	rs7338660	A	G	G	A	0.319469	565	0.327535	0.0588242	4.01e-08	13	24144509	24250232	TNFRSF19 (Pietzner 2021)	TRUE	TRUE
C1QTNF9:P0C862:OID30620	OID30620	P0C862	C1QTNF9	0	0	Inflammation_II	C1QTNF9	13	24939123	rs9580956	G	C	C	G	0.17284	567	-0.758239	0.0706994	1.58e-24	13	24881304	24896673	C1QTNF9 (Pietzner 2021)	TRUE	TRUE
POSTN:Q15063:OID30410	OID30410	Q15063	POSTN	1	0	Cardiometabolic_II	POSTN	13	37574708	rs9603126	G	A	G	A	0.3471	569	0.306918	0.0653426	3.32e-06	13	38136720	38172981	POSTN (Pietzner 2021, p=2.26e-6)	TRUE	TRUE
POSTN:Q15063:OID30410	OID30410	Q15063	POSTN	0	0	Cardiometabolic_II	POSTN	13	38169715	rs11619443	C	G	G	C	0.281802	566	0.278005	0.062773	1.14e-05	13	38136720	38172981	POSTN (Pietzner 2021)	TRUE	TRUE
TSC22D1:Q15714:OID31016	OID31016	Q15714	TSC22D1	0	0.4431	Neurology_II	TSC22D1	13	44961158	rs9533839	C	T	T	C	0.444812	453	0.25486	0.0642095	8.41e-05	13	45007655	45151283	----	NA	FALSE
CPB2:Q96IY4:OID30734	OID30734	Q96IY4	CPB2	0	0	Inflammation_II	CPB2	13	46638131	rs1977395	C	T	C	T	0.253097	565	-0.584511	0.0605465	1.72e-20	13	46627321	46679211	CPB2 (Pietzner 2021)	TRUE	TRUE
LCP1:P13796:OID30367	OID30367	P13796	LCP1	0	0	Cardiometabolic_II	LCP1	13	46704260	rs7331279	C	T	T	C	0.0354767	451	1.50387	0.161769	6.71e-19	13	46700055	46786006	----	FALSE	TRUE
PCDH9:Q9HC56:OID31516	OID31516	Q9HC56	PCDH9	0	0	Oncology_II	PCDH9	13	67129735	rs2210927	C	T	C	T	0.139073	453	-0.358507	0.0892569	6.93e-05	13	66876967	67804468	PCDH9 (Pietzner 2021, p=7.13e-4)	FALSE	TRUE
GPC5:P78333:OID20944	OID20944	P78333	GPC5	1	0	Neurology	GPC5	13	92051677	rs9523325	T	G	T	G	0.215789	570	0.389832	0.0690766	2.65e-08	13	92050929	93519490	GPC5 (Pietzner 2021)	TRUE	TRUE
GPC5:P78333:OID20944	OID20944	P78333	GPC5	0	0	Neurology	GPC5	13	92442408	rs189376	A	T	T	A	0.22935	569	-0.735936	0.0610468	6.47e-30	13	92050929	93519490	GPC5 (Pietzner 2021)	TRUE	TRUE
DOCK9:Q9BZ29:OID30836	OID30836	Q9BZ29	DOCK9	0	0.7475	Neurology_II	DOCK9	13	100356141	rs76223471	A	G	G	A	0.0521064	451	-0.613165	0.145249	2.95e-05	13	99445741	99738879	----	FALSE	TRUE
GGACT:Q9BVM4:OID30290	OID30290	Q9BVM4	GGACT	0	0.0084	Cardiometabolic_II	GGACT	13	101201352	rs9585455	A	G	A	G	0.453642	453	0.484232	0.0589791	2.42e-15	13	101183810	101241782	----	NA	FALSE
ITGBL1:O95965:OID30408	OID30408	O95965	ITGBL1	0	0	Cardiometabolic_II	ITGBL1	13	102236446	rs9513922	G	C	C	G	0.227837	564	0.440369	0.0655255	4.5e-11	13	102104966	102375456	----	NA	FALSE
COL4A1:P02462:OID20208	OID20208	P02462	COL4A1	0	0	Cardiometabolic	COL4A1	13	111117134	rs142740515	G	A	A	G	0.0255556	450	-0.902936	0.199777	7.96e-06	13	110801318	110959496	----	NA	FALSE
LAMP1:P11279:OID30416	OID30416	P11279	LAMP1	0	0	Cardiometabolic_II	LAMP1	13	113150229	rs1300007	T	C	T	C	0.36031	451	0.275917	0.0680252	5.9e-05	13	113951556	113977987	----	FALSE	TRUE
F7:P08709:OID20372	OID20372	P08709	F7	0	0	Cardiometabolic	F7	13	113756540	rs555212	A	G	A	G	0.249123	570	0.370005	0.06248	5.55e-09	13	113760105	113774995	F7 (Pietzner 2021)	TRUE	TRUE
F10:P00742:OID30684	OID30684	P00742	F10	0	0	Inflammation_II	F10	13	113813321	rs3024713	G	A	A	G	0.146799	453	-0.369846	0.0925446	7.53e-05	13	113777128	113803843	F10 (Sun, Pietzner 2021)	TRUE	TRUE
GAS6:Q14393:OID20318	OID20318	Q14393	GAS6	0	0	Cardiometabolic	GAS6	13	114551993	rs6602909	T	C	C	T	0.308204	451	-0.314855	0.0687112	5.99e-06	13	114523522	114567046	GAS6 (Pietzner 2021)	TRUE	TRUE
RNASE10:Q5GAN6:OID30238	OID30238	Q5GAN6	RNASE10	0	0	Cardiometabolic_II	RNASE10	14	20971784	rs4981223	A	G	A	G	0.458057	453	0.832929	0.0585746	4.41e-38	14	20973696	20979328	----	FALSE	TRUE
EDDM3B:P56851:OID31365	OID31365	P56851	EDDM3B	0	0.5	Oncology_II	EDDM3B	14	21244696	rs1885318	A	C	C	A	0.195614	570	-0.407909	0.0703782	1.13e-08	14	21236586	21239107	----	FALSE	TRUE
RNASE6:Q93091:OID30689	OID30689	Q93091	RNASE6	0	0	Inflammation_II	RNASE6	14	21248796	rs11627265	C	G	G	C	0.42146	452	-0.304371	0.0595644	4.8e-07	14	21249210	21250626	RNASE6 (Pietzner 2021)	TRUE	TRUE
RNASE3:P12724:OID20203	OID20203	P12724	RNASE3	0	0.0033	Cardiometabolic	RNASE3	14	21361384	rs11849372	T	C	C	T	0.056239	569	0.579595	0.124555	4.08e-06	14	21359558	21360507	----	FALSE	TRUE
THTPA:Q9BU02:OID31375	OID31375	Q9BU02	THTPA	0	0	Oncology_II	THTPA	14	24007810	rs4982768	T	C	C	T	0.153422	453	-0.528945	0.0842424	8.13e-10	14	24025216	24029480	----	FALSE	TRUE
PSME1:Q06323:OID20969	OID20969	Q06323	PSME1	0	0	Neurology	PSME1	14	25415993	rs9671254	T	A	T	A	0.245575	452	-0.301233	0.072119	3.56e-05	14	24605367	24608176	----	FALSE	TRUE
GZMH:P20718:OID20096	OID20096	P20718	GZMH	0	0	Cardiometabolic	GZMH	14	25890401	rs2748206	A	C	A	C	0.207506	453	0.343105	0.0782657	1.46e-05	14	25075686	25078905	----	FALSE	TRUE
COCH:O43405:OID30305	OID30305	O43405	COCH	1	0	Cardiometabolic_II	COCH	14	31339073	rs35561078	A	G	G	A	0.121053	570	0.562255	0.0843876	6.43e-11	14	31343720	31364271	COCH (Emilsson, Pietzner 2021)	TRUE	TRUE
COCH:O43405:OID30305	OID30305	O43405	COCH	0	0	Cardiometabolic_II	COCH	14	31958566	rs10872853	G	A	A	G	0.152318	453	-0.341839	0.0869474	9.79e-05	14	31343720	31364271	----	FALSE	TRUE
NID2:Q14112:OID21085	OID21085	Q14112	NID2	0	0	Neurology	NID2	14	52469647	rs1253684	G	A	A	G	0.485088	570	-0.451283	0.058129	3.94e-14	14	52471521	52535712	NID2 (Pietzner 2021)	TRUE	TRUE
LGALS3:P17931:OID20284	OID20284	P17931	LGALS3	1	0	Cardiometabolic	LGALS3	14	54849706	rs8018998	A	C	C	A	0.490066	453	-0.255213	0.0614832	3.97e-05	14	55590828	55612126	----	FALSE	TRUE
LGALS3:P17931:OID20284	OID20284	P17931	LGALS3	0	0	Cardiometabolic	LGALS3	14	55610940	rs8013027	C	G	G	C	0.416226	567	-0.527419	0.0494789	2.84e-24	14	55590828	55612126	LGALS3 (Pietzner 2021)	TRUE	TRUE
FUT8:Q9BYC5:OID20992	OID20992	Q9BYC5	FUT8	1	0	Neurology	FUT8	14	65797784	rs9635249	A	G	A	G	0.225446	448	0.689401	0.0750003	1.55e-18	14	65877310	66210839	FUT8 (Pietzner 2021)	TRUE	TRUE
FUT8:Q9BYC5:OID20992	OID20992	Q9BYC5	FUT8	0	0	Neurology	FUT8	14	66927478	rs12587244	C	T	T	C	0.345614	570	-0.246244	0.0615837	7.23e-05	14	65877310	66210839	----	FALSE	TRUE
SMOC1:Q9H4F8:OID21461	OID21461	Q9H4F8	SMOC1	0	0	Oncology	SMOC1	14	70460554	rs227417	T	C	T	C	0.436731	569	0.217208	0.0489259	1.09e-05	14	70320848	70499083	SMOC1 (Pietzner 2021)	TRUE	TRUE
ENTPD5:O75356:OID20104	OID20104	O75356	ENTPD5	0	0	Cardiometabolic	ENTPD5	14	74666641	rs887595	A	G	A	G	0.10596	453	-0.534002	0.108333	1.17e-06	14	74424713	74486102	ENTPD5 (Pietzner 2021)	TRUE	TRUE
ACYP1:P07311:OID30642	OID30642	P07311	ACYP1	0	0	Inflammation_II	ACYP1	14	75514489	rs28756986	C	G	G	C	0.0154525	453	-1.85133	0.25215	1.01e-12	14	75519924	75536186	----	NA	FALSE
FLRT2:O43155:OID20946	OID20946	O43155	FLRT2	0	0	Neurology	FLRT2	14	86125649	rs12432931	A	G	G	A	0.161687	569	-0.605018	0.0755242	6.64e-15	14	85996488	86095034	FLRT2 (Pietzner 2021)	TRUE	TRUE
ATXN3:P54252:OID31149	OID31149	P54252	ATXN3	0	0	Neurology_II	ATXN3	14	92455823	rs72705395	T	G	G	T	0.333333	453	-0.346987	0.0653588	1.75e-07	14	92524896	92572965	ATXN3 (Pietzner 2021)	TRUE	TRUE
LGMN:Q99538:OID20773	OID20773	Q99538	LGMN	0	0	Inflammation	LGMN	14	93184534	rs61994069	G	A	A	G	0.0432373	451	-0.642327	0.161886	8.46e-05	14	93170152	93215047	LGMN (Pitzner 2021)	TRUE	TRUE
SERPINA11:Q86U17:OID20281	OID20281	Q86U17	SERPINA11	1	0	Cardiometabolic	SERPINA11	14	94333934	rs11844317	T	C	C	T	0.218543	453	-0.299545	0.0760355	9.48e-05	14	94908801	94919127	----	FALSE	TRUE
SERPINA6:P08185:OID30743	OID30743	P08185	SERPINA6	0	0	Inflammation_II	SERPINA6	14	94769476	rs11621961	C	T	T	C	0.351754	570	-0.300441	0.0582785	3.52e-07	14	94770585	94789731	----	FALSE	TRUE
SERPINA9:Q86WD7:OID21284	OID21284	Q86WD7	SERPINA9	0	0	Oncology	SERPINA9	14	94918123	rs2402447	A	T	A	T	0.157522	565	0.358665	0.0794565	7.77e-06	14	94929054	94946026	SERPINA9 (Pietzner 2021)	TRUE	TRUE
SERPINA11:Q86U17:OID20281	OID20281	Q86U17	SERPINA11	0	0	Cardiometabolic	SERPINA11	14	94929708	rs2208430	C	T	C	T	0.422737	453	0.629545	0.0567564	2.11e-25	14	94908801	94919127	----	FALSE	TRUE
SERPINA12:Q8IW75:OID20219	OID20219	Q8IW75	SERPINA12	0	0	Cardiometabolic	SERPINA12	14	94987551	rs61978271	T	A	A	T	0.239468	451	-0.733507	0.0680242	3.17e-24	14	94953611	94984181	SERPINA12 (Pietzner 2021)	TRUE	TRUE
SERPINA4:P29622:OID30774	OID30774	P29622	SERPINA4	0	0	Inflammation_II	SERPINA4	14	95040431	rs8019677	C	T	T	C	0.20318	566	0.406157	0.0663633	1.76e-09	14	95027428	95036250	----	FALSE	TRUE
SERPINA3:P01011:OID30786	OID30786	P01011	SERPINA3	1	0	Inflammation_II	SERPINA3	14	95107359	rs72696806	C	T	T	C	0.191111	450	-0.543915	0.0731159	5.34e-13	14	95078714	95090392	----	FALSE	TRUE
SERPINA3:P01011:OID30786	OID30786	P01011	SERPINA3	0	0	Inflammation_II	SERPINA3	14	95992431	rs17756537	C	T	T	C	0.233996	453	-0.271877	0.0687742	8.97e-05	14	95078714	95090392	----	FALSE	TRUE
DLK1:P80370:OID20295	OID20295	P80370	DLK1	0	0	Cardiometabolic	DLK1	14	101175967	rs10873520	G	A	A	G	0.191796	451	-0.418758	0.077263	9.82e-08	14	101192042	101201539	DLK1 (Pietzner 2021)	TRUE	TRUE
AMN:Q9BXJ7:OID20492	OID20492	Q9BXJ7	AMN	0	0.4013	Inflammation	AMN	14	103411835	rs911627	C	T	T	C	0.322622	389	0.408929	0.0697907	1.01e-08	14	103388993	103399933	----	FALSE	TRUE
AHNAK2:Q8IVF2:OID30244	OID30244	Q8IVF2	AHNAK2	0	0	Cardiometabolic_II	AHNAK2	14	105468480	rs60405135	C	G	G	C	0.125664	565	-0.342486	0.0834057	4.63e-05	14	105403581	105444694	----	NA	FALSE
ZFYVE19:Q96K21:OID31452	OID31452	Q96K21	ZFYVE19	0	0	Oncology_II	ZFYVE19	15	41103862	rs2412567	T	C	C	T	0.380492	569	-0.323212	0.0571659	2.5e-08	15	41099284	41106767	----	NA	FALSE
TYRO3:Q06418:OID20161	OID20161	Q06418	TYRO3	0	0	Cardiometabolic	TYRO3	15	41818917	rs1473781	G	A	A	G	0.365342	453	0.419483	0.0654114	3.66e-10	15	41849873	41871536	TYRO3 (Pietzner 2021)	TRUE	TRUE
CKMT1A_CKMT1B:P12532:OID20721	OID20721	P12532	CKMT1B	0	0	Inflammation	CKMT1A_CKMT1B	15	44052248	rs117519814	G	A	A	G	0.0320088	453	-0.820463	0.190621	2.06e-05	15	43885252	43897099	----	FALSE	TRUE	CKMT1A (Pietzner, p=8.53E-08)
USP8:P40818:OID20110	OID20110	P40818	USP8	0	0	Cardiometabolic	USP8	15	51387248	rs28637301	G	A	A	G	0.333925	563	-0.280116	0.0620798	7.84e-06	15	50716577	50793280	----	FALSE	TRUE
SCG3:Q8WXD2:OID20728	OID20728	Q8WXD2	SCG3	0	0	Inflammation	SCG3	15	51979674	rs1840707	G	A	G	A	0.235501	569	-0.719361	0.0620629	5.4e-28	15	51973550	52013223	SCG3 (Pietzner 2021)	TRUE	TRUE
CA12:O43570:OID21344	OID21344	O43570	CA12	0	0	Oncology	CA12	15	63693106	rs11071742	C	T	T	C	0.271201	566	-0.292327	0.065815	1.08e-05	15	63613577	63674360	----	FALSE	TRUE
DAPK2:Q9UIK4:OID30505	OID30505	Q9UIK4	DAPK2	0	0.1455	Inflammation_II	DAPK2	15	65108504	rs17802279	A	T	A	T	0.491228	570	0.243046	0.0585957	3.88e-05	15	64199235	64364232	----	FALSE	TRUE
CILP:O75339:OID30399	OID30399	O75339	CILP	0	0	Cardiometabolic_II	CILP	15	65496287	rs11856834	C	T	C	T	0.381898	453	0.36274	0.0617248	8.22e-09	15	65488337	65503826	----	FALSE	TRUE	CILP2 (Pietzner, p=3.01E-05)
IGDCC4:Q8TDY8:OID30402	OID30402	Q8TDY8	IGDCC4	0	0	Cardiometabolic_II	IGDCC4	15	66352479	rs1036367	C	A	C	A	0.0731707	451	0.597999	0.118404	6.46e-07	15	65673802	65715410	IGDCC4 (Pietzner 2021)	TRUE	TRUE
ISLR2:Q6UXK2:OID20889	OID20889	Q6UXK2	ISLR2	0	0.0284	Neurology	ISLR2	15	73592793	rs2680340	G	A	A	G	0.426991	452	0.299994	0.0639146	3.58e-06	15	74392652	74430881	----	FALSE	TRUE
CD276:Q5ZPR3:OID20680	OID20680	Q5ZPR3	CD276	0	0	Inflammation	CD276	15	73979239	rs74026250	A	T	T	A	0.0695364	453	-1.20516	0.114447	2.69e-23	15	73976307	74006859	----	NA	FALSE
PPCDC:Q96CD2:OID21027	OID21027	Q96CD2	PPCDC	0	0	Neurology	PPCDC	15	75304754	rs78434425	C	T	T	C	0.0519366	568	0.792054	0.125719	6.03e-10	15	75315896	75409803	----	FALSE	TRUE
CTSH:P09668:OID20113	OID20113	P09668	CTSH	0	0.0284	Cardiometabolic	CTSH	15	79234470	rs34843303	T	C	C	T	0.128035	453	0.769401	0.0899409	1.94e-16	15	79213400	79241916	CTSH (Pietzner 2021)	TRUE	TRUE
IL16:Q14005:OID20633	OID20633	Q14005	IL16	0	0	Inflammation	IL16	15	81591639	rs4778636	G	A	A	G	0.075388	451	-0.574878	0.121206	2.85e-06	15	81451916	81605104	IL16 (Suhre 2017, PMID: 23894628, PMID: 27989323, PMID: 29234017, Pietzner 2021)	TRUE	TRUE
NTRK3:Q16288:OID21057	OID21057	Q16288	NTRK3	0	0	Neurology	NTRK3	15	88498466	rs11631508	A	G	G	A	0.292105	570	-0.296327	0.0603765	1.21e-06	15	88418230	88799999	NTRK3 (Pietzner 2021)	TRUE	TRUE
MFGE8:Q08431:OID21134	OID21134	Q08431	MFGE8	0	0	Neurology	MFGE8	15	89477902	rs55953398	T	C	C	T	0.289823	452	0.28185	0.0717574	9.94e-05	15	89441916	89456642	MGFE8 (Emilsson 2018, Pietzner 2021)	TRUE	TRUE
ANPEP:P15144:OID20350	OID20350	P15144	ANPEP	0	0	Cardiometabolic	ANPEP	15	90331631	rs28787610	A	G	G	A	0.3471	569	-0.320884	0.0585831	6.53e-08	15	90328120	90358633	ANPEP (Pietzner 2021, p=3.87e-4)	FALSE	TRUE
RGMA:Q96B86:OID21065	OID21065	Q96B86	RGMA	0	0	Neurology	RGMA	15	93610435	rs7174496	T	C	T	C	0.453263	567	0.235074	0.0586053	6.87e-05	15	93586636	93632433	RGMA (Pietzner 2021)	TRUE	TRUE
IGF1R:P08069:OID21274	OID21274	P08069	IGF1R	0	0	Oncology	IGF1R	15	98629996	rs58769948	G	A	A	G	0.0931264	451	0.461404	0.111012	3.88e-05	15	99192200	99507759	----	FALSE	TRUE
HBZ:P02008:OID30307	OID30307	P02008	HBZ	0	0.0602	Cardiometabolic_II	HBZ	16	201389	rs6600143	C	A	C	A	0.290287	453	0.865412	0.0604488	1.71e-38	16	202686	204502	HBZ (Sun, Emilsson, Pietzner 2021)	TRUE	TRUE
HBQ1:P09105:OID21433	OID21433	P09105	HBQ1	0	0	Oncology	HBQ1	16	252479	rs11642609	T	C	C	T	0.47193	570	0.301327	0.0564064	1.34e-07	16	230452	231180	HBQ1 (Pietzner 2021, p=0.0159)	FALSE	TRUE	HBZ (Pietzner 2021)
MSLN:Q13421:OID21380	OID21380	Q13421	MSLN	0	0	Oncology	MSLN	16	810039	rs3764247	A	C	C	A	0.227373	453	0.398574	0.0744301	1.38e-07	16	810762	818865	MSLN (Pietzner 2021, p=0.0046)	FALSE	TRUE
TPSAB1:Q15661:OID20642	OID20642	Q15661	TPSAB1	0	0	Inflammation	TPSAB1	16	1262855	rs4984769	T	C	T	C	0.210817	453	-0.686985	0.0717462	7.21e-20	16	1290697	1292555	TPSAB1 (Pietzner 2021)	TRUE	TRUE
TPSD1:Q9BZJ3:OID30982	OID30982	Q9BZJ3	TPSD1	0	0.0886	Neurology_II	TPSD1	16	1492860	rs113953823	C	T	T	C	0.0243902	451	0.844651	0.212098	7.98e-05	16	1306060	1308532	----	NA	TRUE	TPSB1 (Pietzner 2021)
PKD1:P98161:OID30328	OID30328	P98161	PKD1	0	0	Cardiometabolic_II	PKD1	16	2146288	rs74002781	C	T	T	C	0.0582011	567	0.507943	0.112659	7.95e-06	16	2138711	2185899	----	NA	FALSE
VASN:Q6EMK4:OID20345	OID20345	Q6EMK4	VASN	0	0	Cardiometabolic	VASN	16	4611116	rs7201687	A	G	A	G	0.174444	450	0.424678	0.0843204	6.93e-07	16	4421849	4433529	----	FALSE	TRUE
CPPED1:Q9BRF8:OID21053	OID21053	Q9BRF8	CPPED1	0	0	Neurology	CPPED1	16	12887164	rs9928245	C	T	T	C	0.0984513	452	0.760965	0.10413	1.28e-12	16	12756919	12897874	----	NA	FALSE
UMOD:P07911:OID20237	OID20237	P07911	UMOD	0	0	Cardiometabolic	UMOD	16	20364588	rs4293393	A	G	G	A	0.1766	453	-0.830248	0.0789061	2.89e-23	16	20344374	20367623	UMOD (Pietzner 2021, p=0.0155)	FALSE	TRUE
IL4R:P24394:OID20576	OID20576	P24394	IL4R	0	0	Inflammation	IL4R	16	27322095	rs2057768	C	T	T	C	0.282456	570	-0.310246	0.0600737	3.36e-07	16	27324989	27376099	----	FALSE	TRUE
APOBR:Q0VD83:OID30246	OID30246	Q0VD83	APOBR	1	0	Cardiometabolic_II	APOBR	16	28506872	rs149271	A	G	G	A	0.430155	451	-0.821084	0.0600186	8.97e-36	16	28505970	28510291	----	NA	FALSE
APOBR:Q0VD83:OID30246	OID30246	Q0VD83	APOBR	0	0	Cardiometabolic_II	APOBR	16	28622957	rs3020795	C	G	C	G	0.448529	272	-0.615509	0.0820682	9.82e-13	16	28505970	28510291	----	NA	FALSE
PRSS53:Q2L4Q9:OID31093	OID31093	Q2L4Q9	PRSS53	0	0.0017	Neurology_II	PRSS53	16	31092075	rs7196726	G	A	A	G	0.378307	567	0.56993	0.0562492	2.92e-22	16	31094746	31100949	----	NA	FALSE
PYDC1:Q8WXC3:OID30202	OID30202	Q8WXC3	PYDC1	0	0.0117	Cardiometabolic_II	PYDC1	16	31260012	rs8051304	C	A	A	C	0.59894	566	0.369574	0.0606498	2.06e-09	16	31227283	31228680	----	FALSE	TRUE
CES1:P23141:OID20244	OID20244	P23141	CES1	0	0	Cardiometabolic	CES1	16	54900348	rs76283661	C	T	T	C	0.0920177	451	0.469833	0.111494	3.04e-05	16	55836763	55867249	----	FALSE	TRUE
CIAPIN1:Q6FI81:OID21501	OID21501	Q6FI81	CIAPIN1	0	0	Oncology	CIAPIN1	16	57870547	rs116998164	T	G	G	T	0.0288248	451	-0.784553	0.19549	7.03e-05	16	57462081	57481440	----	NA	FALSE
CDH1:P12830:OID20353	OID20353	P12830	CDH1	0	0	Cardiometabolic	CDH1	16	68434100	rs142994099	A	C	C	A	0.0158172	569	-0.893747	0.226911	9.22e-05	16	68771128	68869451	----	FALSE	TRUE
IL34:Q6ZMJ4:OID20809	OID20809	Q6ZMJ4	IL34	0	0.6187	Neurology	IL34	16	70662323	rs8061329	G	T	T	G	0.288079	453	-0.305697	0.0724748	2.99e-05	16	70613798	70694585	----	FALSE	TRUE
CTRB1:P17538:OID21150	OID21150	P17538	CTRB1	0	0	Neurology	CTRB1	16	75255217	rs8051363	A	G	A	G	0.225166	453	-0.56085	0.0725783	7.38e-14	16	75252898	75258822	CTRB1 (Sun, Emilsson, Pitzner 2021)	TRUE	TRUE
HSBP1:O75506:OID30232	OID30232	O75506	HSBP1	1	0.0134	Cardiometabolic_II	HSBP1	16	83799679	rs2008055	T	C	C	T	0.267108	453	-0.378459	0.0734234	3.84e-07	16	83841448	83853342	----	NA	FALSE
HSBP1:O75506:OID30232	OID30232	O75506	HSBP1	0	0.0134	Cardiometabolic_II	HSBP1	16	83903268	rs2550459	G	A	G	A	0.0475664	452	0.682988	0.162905	3.33e-05	16	83841448	83853342	----	NA	FALSE
CA5A:P35218:OID20075	OID20075	P35218	CA5A	0	0.0067	Cardiometabolic	CA5A	16	87908401	rs9673909	C	T	T	C	0.204194	453	0.545593	0.0794648	2.24e-11	16	87921625	87970135	----	FALSE	TRUE
CDH15:P55291:OID21005	OID21005	P55291	CDH15	1	0	Neurology	CDH15	16	89202041	rs12934720	C	T	T	C	0.136865	453	0.448809	0.0953332	3.35e-06	16	89238175	89261900	----	FALSE	TRUE
CDH15:P55291:OID21005	OID21005	P55291	CDH15	0	0	Neurology	CDH15	16	89237952	rs190099280	G	C	C	G	0.0166297	451	1.45134	0.245488	6.76e-09	16	89238175	89261900	----	FALSE	TRUE
DPEP1:P16444:OID20897	OID20897	P16444	DPEP1	0	0	Neurology	DPEP1	16	89740873	rs423135	G	A	G	A	0.486637	449	-0.731616	0.0567898	1.9e-32	16	89679716	89704839	DPEP1 (Emilsson, Pietzner 2021)	TRUE	TRUE
SERPINF1:P36955:OID30757	OID30757	P36955	SERPINF1	0	0	Inflammation_II	SERPINF1	17	813068	rs2940810	G	A	G	A	0.48234	453	-0.275737	0.0585505	3.33e-06	17	1665253	1680868	----	FALSE	TRUE
SCARF1:Q14162:OID20297	OID20297	Q14162	SCARF1	0	0	Cardiometabolic	SCARF1	17	1541017	rs1814986	T	C	T	C	0.353616	567	0.425211	0.0575004	5.22e-13	17	1537152	1549041	SCARF1 (Pietzner 2021)	TRUE	TRUE
VMO1:Q7Z5L0:OID21381	OID21381	Q7Z5L0	VMO1	0	0.0167	Oncology	VMO1	17	4690038	rs8078118	C	A	A	C	0.408389	453	0.503132	0.0631469	1.37e-14	17	4688580	4689728	----	NA	FALSE
ASGR1:P07306:OID20990	OID20990	P07306	ASGR1	0	0	Neurology	ASGR1	17	6388959	rs80026974	G	A	A	G	0.0695364	453	0.565572	0.124727	7.44e-06	17	7076750	7082883	----	FALSE	TRUE
CLEC10A:Q8IUN9:OID20928	OID20928	Q8IUN9	CLEC10A	0	0	Neurology	CLEC10A	17	6977694	rs415704	C	T	T	C	0.291228	570	0.420534	0.0611329	1.61e-11	17	6977856	6983626	----	FALSE	TRUE
ASGR2:P07307:OID30679	OID30679	P07307	ASGR2	0	0	Inflammation_II	ASGR2	17	7288920	rs113149981	G	A	A	G	0.0176056	568	-0.873077	0.22022	8.31e-05	17	7004641	7019019	----	FALSE	TRUE
TNFSF13:O75888:OID20733	OID20733	O75888	TNFSF13	0	0	Inflammation	TNFSF13	17	7448109	rs34951138	G	C	C	G	0.256184	566	-0.328121	0.0629388	2.62e-07	17	7461609	7464925	----	NA	TRUE	TNFSF13B (Pietzner 2021)
TNFSF12:O43508:OID20624	OID20624	O43508	TNFSF12	0	0	Inflammation	TNFSF12	17	7460758	rs28362665	G	A	A	G	0.0964912	570	-0.474405	0.0981214	1.72e-06	17	7452208	7464925	TNFSF12 (Pietzner 2021)	TRUE	TRUE
SHMT1:P34896:OID20714	OID20714	P34896	SHMT1	0	0	Inflammation	SHMT1	17	18220770	rs1563632	G	A	G	A	0.30212	566	-0.656331	0.056488	4.28e-28	17	18231187	18266856	SHMT1 (Pietzner 2021); SHMT1 Liver (PMID: 32778093)	TRUE	TRUE
LGALS9:O00182:OID20781	OID20781	O00182	LGALS9	0	0	Inflammation	LGALS9	17	25987786	rs34642808	C	T	T	C	0.230634	568	-0.517644	0.0567618	1.35e-18	17	25956824	25976586	LGALS9 (Pietzner 2021)	TRUE	TRUE
BLMH:Q13867:OID20336	OID20336	Q13867	BLMH	0	0	Cardiometabolic	BLMH	17	28652947	rs76947460	A	G	G	A	0.422807	570	0.619967	0.0531462	2.64e-28	17	28575218	28619074	----	FALSE	TRUE
CCL8:P80075:OID21466	OID21466	P80075	CCL8	0	0	Oncology	CCL8	17	32649737	rs11575057	T	C	C	T	0.172949	451	-0.749646	0.077742	4.26e-20	17	32646055	32648421	CCL8 (Pietzner 2021)	TRUE	TRUE
CCL2:P13500:OID21004	OID21004	P13500	CCL2	0	0	Neurology	CCL2	17	33287651	rs1482103	A	G	A	G	0.424945	453	-0.23063	0.0584831	9.33e-05	17	32582304	32584222	----	FALSE	TRUE
CCL5:P13501:OID20412	OID20412	P13501	CCL5	0	0	Cardiometabolic	CCL5	17	34243343	rs11868244	T	C	C	T	0.130511	567	-0.481078	0.0862935	3.86e-08	17	34198495	34207797	CCL5 (Pietzner 2021)	TRUE	TRUE
CCL23:P55773:OID20693	OID20693	P55773	CCL23	0	0	Inflammation	CCL23	17	34327923	rs854624	G	T	G	T	0.0883002	453	-0.654692	0.105704	1.34e-09	17	34340096	34345005	CCL23 (Pietzner 2021)	TRUE	TRUE
CCL15:Q16663:OID20328	OID20328	Q16663	CCL15	1	0	Cardiometabolic	CCL15	17	34329535	rs854626	C	A	C	A	0.089404	453	1.55179	0.0882546	6.6e-53	17	34323476	34329084	CCL15 (Sun 2018, Pietzner 2021)	TRUE	TRUE
CCL15:Q16663:OID20328	OID20328	Q16663	CCL15	0	0	Cardiometabolic	CCL15	17	34365238	rs854643	G	A	G	A	0.0404412	272	1.30678	0.216054	5e-09	17	34323476	34329084	CCL15 (PMID: 29875488)	TRUE	TRUE
CCL18:P55774:OID20395	OID20395	P55774	CCL18	0	0	Cardiometabolic	CCL18	17	34377725	rs58818008	A	T	T	A	0.110619	113	1.143	0.168447	7.29e-10	17	34391640	34399392	CCL18 (PMID: 30072576, PMID: 36168886, PMID: 34814699, Pietzner 2021)	TRUE	TRUE
CCL4:P13236:OID20695	OID20695	P13236	CCL4	1	0	Inflammation	CCL4	17	34426245	rs1634508	C	A	A	C	0.252205	567	-0.296643	0.0643049	4.93e-06	17	34430983	34433014	----	NA	TRUE	CCL4L (Pietzner 2021)
CCL4:P13236:OID20695	OID20695	P13236	CCL4	0	0	Inflammation	CCL4	17	34848436	rs1542611	G	T	T	G	0.0840708	452	-0.475893	0.110051	1.89e-05	17	34430983	34433014	----	NA	TRUE	CCL4L (Pietzner 2021)
PLXDC1:Q8IUK5:OID21258	OID21258	Q8IUK5	PLXDC1	0	0.0017	Oncology	PLXDC1	17	37245007	rs12150584	A	T	T	A	0.257743	452	0.32669	0.0769367	2.65e-05	17	37219556	37310647	----	FALSE	TRUE
AOC3:Q16853:OID20389	OID20389	Q16853	AOC3	0	0	Cardiometabolic	AOC3	17	40721042	rs650558	C	T	T	C	0.226667	450	-0.542451	0.0697952	5.49e-14	17	41003201	41010147	----	NA	FALSE
LRRC37A2:A6NM11:OID31440	OID31440	A6NM11	LRRC37A2	0	0	Oncology_II	LRRC37A2	17	43994252	rs77926909	T	C	C	T	0.176316	570	1.0258	0.0610052	1.11e-51	17	44588877	44633016	----	FALSE	TRUE	trans-pQTL sRAGE (Pietzner 2021)
WFIKKN2:Q8TEU8:OID20785	OID20785	Q8TEU8	WFIKKN2	0	0	Inflammation	WFIKKN2	17	48909434	rs4591185	T	A	T	A	0.29646	452	0.571768	0.0652179	3.96e-17	17	48912011	48919709	WFIKKN2 (Pitzner 2021)	TRUE	TRUE
MPO:P05164:OID21100	OID21100	P05164	MPO	0	0	Neurology	MPO	17	56457097	rs757484	C	G	C	G	0.179262	569	0.313338	0.0773746	5.85e-05	17	56347217	56358296	MPO (Pietzner 2021)	TRUE	TRUE
CA4:P22748:OID20241	OID20241	P22748	CA4	0	0	Cardiometabolic	CA4	17	58327383	rs237968	T	A	A	T	0.0387168	452	-0.728656	0.167575	1.7e-05	17	58227297	58248260	----	FALSE	TRUE
ACE:P12821:OID30696	OID30696	P12821	ACE	0	0.0033	Inflammation_II	ACE	17	61566031	rs4343	G	A	A	G	0.510619	565	-0.711514	0.0528101	5.25e-36	17	61554422	61599205	ACE (PMID:23894628, Pietzner 2021)	TRUE	TRUE
MILR1:Q7Z6M3:OID20482	OID20482	Q7Z6M3	MILR1	1	0	Inflammation	MILR1	17	62018773	rs2070720	T	C	C	T	0.360526	570	-0.23896	0.0594553	6.64e-05	17	62461569	62464760	----	FALSE	TRUE
MILR1:Q7Z6M3:OID20482	OID20482	Q7Z6M3	MILR1	0	0	Inflammation	MILR1	17	62469454	rs8072051	G	C	C	G	0.0905097	569	0.819705	0.097549	3.6e-16	17	62461569	62464760	----	FALSE	TRUE
CEP112:Q8N8E3:OID30115	OID30115	Q8N8E3	CEP112	0	0.5167	Cardiometabolic_II	CEP112	17	63833653	rs114298253	C	G	G	C	0.248889	450	-0.312164	0.0747005	3.53e-05	17	63631656	64188202	----	NA	FALSE
APOH:P02749:OID21072	OID21072	P02749	APOH	0	0	Neurology	APOH	17	64210580	rs1801689	A	C	C	A	0.0198675	453	-1.31272	0.234846	3.98e-08	17	64208151	64252643	----	FALSE	TRUE
FAM20A:Q96MK3:OID30348	OID30348	Q96MK3	FAM20A	0	0	Cardiometabolic_II	FAM20A	17	66601382	rs62086824	C	T	T	C	0.0666075	563	-0.405944	0.103205	9.44e-05	17	66531254	66597530	FAM20A (Pietzner 2021)	TRUE	TRUE
SDK2:Q58EX2:OID30662	OID30662	Q58EX2	SDK2	0	0	Inflammation_II	SDK2	17	71587577	rs11655934	G	A	A	G	0.141544	272	-0.669253	0.11701	2.9e-08	17	71330523	71640228	----	NA	FALSE
CD300C:Q08708:OID21010	OID21010	Q08708	CD300C	0	0	Neurology	CD300C	17	72537878	rs2293188	G	A	A	G	0.0874558	566	0.579077	0.098888	8.11e-09	17	72537247	72542282	CD300C (Pietzner 2021, p=2.86e-4)	FALSE	TRUE
CD300E:Q496F6:OID21418	OID21418	Q496F6	CD300E	0	0	Oncology	CD300E	17	72595488	rs524216	C	T	C	T	0.290929	452	0.443256	0.0642691	1.84e-11	17	72606026	72619897	----	FALSE	TRUE
CD300LF:Q8TDQ1:OID21469	OID21469	Q8TDQ1	CD300LF	0	0	Oncology	CD300LF	17	72699833	rs10512597	T	C	T	C	0.216667	570	-1.09349	0.0560717	4.73e-65	17	72690452	72709117	----	FALSE	TRUE
NT5C:Q8TCD5:OID30294	OID30294	Q8TCD5	NT5C	0	0	Cardiometabolic_II	NT5C	17	73127348	rs11541956	G	A	A	G	0.0309051	453	-1.96402	0.170227	4.09e-27	17	73126320	73127890	NT5C (Emilsson, Sun, Pietzner 2021)	TRUE	TRUE
ENPP7:Q6UWV6:OID20689	OID20689	Q6UWV6	ENPP7	0	0	Inflammation	ENPP7	17	77697097	rs8065292	A	G	G	A	0.284444	450	0.935202	0.0615363	3.01e-42	17	77704681	77716021	ENPP7 (Sun 2018)	TRUE	TRUE
SGSH:P51688:OID30341	OID30341	P51688	SGSH	1	0	Cardiometabolic_II	SGSH	17	78171944	rs2066964	G	C	G	C	0.466912	272	-0.524705	0.0832471	1.22e-09	17	78180515	78194722	----	NA	FALSE
SGSH:P51688:OID30341	OID30341	P51688	SGSH	0	0	Cardiometabolic_II	SGSH	17	78182418	rs7211656	G	A	G	A	0.406854	569	-0.587523	0.0535036	1.53e-25	17	78180515	78194722	----	NA	FALSE
NPTX1:Q15818:OID21074	OID21074	Q15818	NPTX1	0	0	Neurology	NPTX1	17	78594507	rs61215193	G	A	A	G	0.079646	452	0.920307	0.111657	1.93e-15	17	78440948	78451643	NPTX1 (Pietzner 2021)	TRUE	TRUE
CD7:P09564:OID30543	OID30543	P09564	CD7	0	0	Inflammation_II	CD7	17	80291652	rs116473040	A	G	G	A	0.0497788	452	-0.828968	0.143971	1.59e-08	17	80272744	80275478	CD7 (Emilsson, Pietzner 2021)	TRUE	TRUE
CLUL1:Q15846:OID20198	OID20198	Q15846	CLUL1	0	0	Cardiometabolic	CLUL1	18	582818	rs508441	G	A	A	G	0.302895	449	-0.395116	0.0693232	2.2e-08	18	596988	650334	----	NA	FALSE
IMPACT:Q9P2X3:OID31112	OID31112	Q9P2X3	IMPACT	0	0	Neurology_II	IMPACT	18	22232144	rs117165412	A	G	G	A	0.0167549	567	-0.981334	0.225425	1.6e-05	18	22006580	22033499	----	NA	FALSE
DSC2:Q02487:OID21079	OID21079	Q02487	DSC2	0	0	Neurology	DSC2	18	28671212	rs1790683	T	G	T	G	0.267108	453	0.272157	0.0676586	6.77e-05	18	28645940	28682378	DSC2 (Pietzner 2021)	TRUE	TRUE
MEP1B:Q16820:OID20168	OID20168	Q16820	MEP1B	0	0.0184	Cardiometabolic	MEP1B	18	29797958	rs680321	T	C	C	T	0.472406	453	-0.276717	0.0644252	2.15e-05	18	29765032	29800367	----	NA	FALSE
TNFRSF11A:Q9Y6Q6:OID20646	OID20646	Q9Y6Q6	TNFRSF11A	1	0	Inflammation	TNFRSF11A	18	59987339	rs9956227	T	C	T	C	0.0950704	568	0.453181	0.0875291	3.14e-07	18	59992520	60058516	----	NA	FALSE
TNFRSF11A:Q9Y6Q6:OID20646	OID20646	Q9Y6Q6	TNFRSF11A	0	0	Inflammation	TNFRSF11A	18	60066888	rs2957137	A	T	A	T	0.386042	566	0.427276	0.0494401	5.85e-17	18	59992520	60058516	----	NA	FALSE
CD226:Q15762:OID30556	OID30556	Q15762	CD226	0	0	Inflammation_II	CD226	18	67531642	rs763361	T	C	T	C	0.485088	570	-0.368419	0.055137	5.7e-11	18	67498394	67629039	CD226 (Pietzner 2021, p=3.02e-6)	TRUE	TRUE
CNDP1:Q96KN2:OID20347	OID20347	Q96KN2	CNDP1	0	0	Cardiometabolic	CNDP1	18	72202263	rs17816861	G	T	T	G	0.151214	453	0.366267	0.0906489	6.29e-05	18	72201675	72254448	CNDP1 (Pietzner 2021)	TRUE	TRUE
ADAMTSL5:Q6ZMM2:OID30355	OID30355	Q6ZMM2	ADAMTSL5	0	0	Cardiometabolic_II	ADAMTSL5	19	1497121	rs2244801	G	T	T	G	0.312639	451	0.270748	0.0652035	3.95e-05	19	1505017	1513603	----	NA	FALSE
THOP1:P52888:OID20194	OID20194	P52888	THOP1	0	0	Cardiometabolic	THOP1	19	2775668	rs759067	C	T	T	C	0.24	450	0.370113	0.0748916	1.1e-06	19	2785458	2813599	----	NA	FALSE
LRG1:P02750:OID30751	OID30751	P02750	LRG1	0	0	Inflammation_II	LRG1	19	4289027	rs144727106	G	A	A	G	0.178492	451	-0.347511	0.0858468	6.1e-05	19	4536421	4540486	----	NA	FALSE
PLIN3:O60664:OID20143	OID20143	O60664	PLIN3	0	0	Cardiometabolic	PLIN3	19	4591634	rs4530284	A	G	G	A	0.359823	453	0.266377	0.0613724	1.76e-05	19	4838353	4867780	----	FALSE	TRUE
PTPRS:Q13332:OID20306	OID20306	Q13332	PTPRS	0	0	Cardiometabolic	PTPRS	19	5295567	rs10415188	A	G	A	G	0.264901	453	0.300387	0.071244	3.01e-05	19	5158506	5340814	----	FALSE	TRUE
LONP1:P36776:OID30219	OID30219	P36776	LONP1	0	0.107	Cardiometabolic_II	LONP1	19	5669970	rs8102642	C	G	G	C	0.354386	570	-0.250078	0.0610172	4.77e-05	19	5691845	5720583	----	FALSE	TRUE
FUT3_FUT5:P21217_Q11128:OID21013	OID21013	P21217_Q11128	FUT3	0	0	Neurology	FUT3_FUT5	19	5834212	rs17271883	C	T	T	C	0.35	570	-0.401693	0.0562359	2.85e-12	19	5842899	5851485	FUT3 (Pietzner 2021)	NA	TRUE
CD70:P32970:OID20599	OID20599	P32970	CD70	0	0	Inflammation	CD70	19	6591680	rs344592	C	G	C	G	0.393805	452	0.423004	0.0665489	5.14e-10	19	6583194	6604114	----	FALSE	TRUE
TNFSF14:O43557:OID20953	OID20953	O43557	TNFSF14	0	0	Neurology	TNFSF14	19	6672594	rs173171	C	G	C	G	0.0595027	563	-0.609205	0.119101	4.33e-07	19	6663148	6670599	TNFSF14 (Pietzner 2021)	TRUE	TRUE
RETN:Q9HD89:OID20327	OID20327	Q9HD89	RETN	0	0	Cardiometabolic	RETN	19	7735297	rs3745368	G	A	A	G	0.0397351	453	-0.900097	0.166695	1.09e-07	19	7733930	7735334	RETN (Sun 2018, Pietzner 2021)	TRUE	TRUE
FCER2:P06734:OID21133	OID21133	P06734	FCER2	0	0	Neurology	FCER2	19	7754676	rs113483829	C	T	T	C	0.259956	452	-0.288195	0.0715221	6.58e-05	19	7753644	7767032	FCER2 (Pietzner 2021)	TRUE	TRUE
MCEMP1:Q8IX19:OID30501	OID30501	Q8IX19	MCEMP1	0	0.0753	Inflammation_II	MCEMP1	19	7758880	rs35157374	C	G	G	C	0.206858	452	-0.317176	0.0782264	5.93e-05	19	7741514	7744712	----	FALSE	TRUE
CCL25:O15444:OID20674	OID20674	O15444	CCL25	0	0	Inflammation	CCL25	19	8120666	rs55755237	C	T	T	C	0.150735	272	0.638503	0.11364	4.9e-08	19	8117651	8127534	CCL25 (Pietzner 2021)	TRUE	TRUE
ICAM5:Q9UMF0:OID20145	OID20145	Q9UMF0	ICAM5	0	0	Cardiometabolic	ICAM5	19	10425986	rs368835	A	G	A	G	0.223333	450	-0.556196	0.0697334	1.31e-14	19	10400657	10407454	ICAM5 (Pietzner 2021)	TRUE	TRUE
ICAM1:P05362:OID20411	OID20411	P05362	ICAM1	0	0	Cardiometabolic	ICAM1	19	10570580	rs60167376	G	C	C	G	0.190685	569	-0.306462	0.0683939	9.02e-06	19	10381511	10397291	ICAM1 (Pietzner 2021)	TRUE	TRUE
ACP5:P13686:OID20314	OID20314	P13686	ACP5	0	0	Cardiometabolic	ACP5	19	11740283	rs75151604	T	C	C	T	0.079646	452	-0.476736	0.118053	6.34e-05	19	11685475	11689823	ACP5 (Pietzner 2021)	TRUE	TRUE
MRI1:Q9BV20:OID30891	OID30891	Q9BV20	MRI1	0	0.0033	Neurology_II	MRI1	19	13883099	rs1469071	A	G	G	A	0.413121	564	-0.378515	0.0569169	7.01e-11	19	13875346	13885096	----	NA	FALSE
ADGRE2:Q9UHX3:OID20755	OID20755	Q9UHX3	ADGRE2	0	0	Inflammation	ADGRE2	19	15083485	rs3746294	T	C	C	T	0.314856	451	0.275081	0.0659233	3.62e-05	19	14843205	14889353	----	FALSE	TRUE
PGLYRP2:Q96PD5:OID30742	OID30742	Q96PD5	PGLYRP2	0	0	Inflammation_II	PGLYRP2	19	15582863	rs34440547	C	T	T	C	0.172185	453	-1.00579	0.0674491	4.67e-41	19	15579456	15609767	----	FALSE	TRUE
IFI30:P13284:OID31505	OID31505	P13284	IFI30	0	0	Oncology_II	IFI30	19	18238193	rs12610206	A	G	G	A	0.138448	567	-0.320755	0.0813185	9.02e-05	19	18283972	18288927	----	NA	FALSE
GDF15:Q99988:OID20251	OID20251	Q99988	GDF15	0	0	Cardiometabolic	GDF15	19	18495510	rs62122430	A	T	T	A	0.128035	453	0.488133	0.0754494	2.6e-10	19	18485541	18499986	GDF15 (Pietzner 2021)	TRUE	TRUE
PDCD5:O14737:OID21021	OID21021	O14737	PDCD5	0	0	Neurology	PDCD5	19	33033231	rs7250741	T	G	G	T	0.265789	570	0.339932	0.0647976	2.21e-07	19	33071974	33078358	PDCD5 (Pietzner 2021)	TRUE	TRUE
PEPD:P12955:OID30688	OID30688	P12955	PEPD	0	0	Inflammation_II	PEPD	19	33886341	rs13343443	T	C	C	T	0.15894	453	-0.505961	0.0860691	8.14e-09	19	33877856	34012700	----	NA	FALSE
GPI:P06744:OID30680	OID30680	P06744	GPI	0	0	Inflammation_II	GPI	19	34034621	rs201644860	C	T	T	C	0.0321508	451	-0.747198	0.179739	3.87e-05	19	34850385	34893061	----	FALSE	TRUE
SBSN:Q6UWP8:OID30398	OID30398	Q6UWP8	SBSN	0	0.1171	Cardiometabolic_II	SBSN	19	36024742	rs17705657	G	T	T	G	0.231027	448	0.538292	0.0735385	1.19e-12	19	36014269	36019253	----	FALSE	TRUE
SPINT2:O43291:OID20720	OID20720	O43291	SPINT2	0	0	Inflammation	SPINT2	19	38796286	rs77027192	A	G	G	A	0.0908289	567	0.420579	0.102073	4.36e-05	19	38734675	38783254	SPINT2 (Pietzner 2021)	TRUE	TRUE
MIA:Q16674:OID21531	OID21531	Q16674	MIA	1	0	Oncology	MIA	19	41279395	rs2607419	A	G	G	A	0.0947368	570	1.33314	0.0844857	1.09e-46	19	41277553	41283395	MIA (PMID:35078996, PMID: 29875488, Pietzner 2021)	TRUE	TRUE
MIA:Q16674:OID21531	OID21531	Q16674	MIA	0	0	Oncology	MIA	19	41302949	rs2644899	G	T	G	T	0.274336	452	0.292183	0.0722323	6.17e-05	19	41277553	41283395	MIA (Pietzner 2021)	TRUE	TRUE
TGFB1:P01137:OID20621	OID20621	P01137	TGFB1	0	0	Inflammation	TGFB1	19	41864509	rs1982072	T	A	T	A	0.297891	569	-0.273166	0.0596328	5.71e-06	19	41807492	41859816	----	FALSE	TRUE
CEACAM21:Q3KPI0:OID20548	OID20548	Q3KPI0	CEACAM21	0	0	Inflammation	CEACAM21	19	42031348	rs8111181	T	C	C	T	0.05	570	1.60505	0.119675	8.97e-36	19	42055886	42093197	----	FALSE	TRUE
CD177:Q8N6Q3:OID21119	OID21119	Q8N6Q3	CD177	0	0.0468	Neurology	CD177	19	43796020	rs73937404	T	C	C	T	0.0408389	453	1.23297	0.155641	1.9e-14	19	43857811	43867480	CD177 (PMID: 29875488, Pietzner 2021)	TRUE	TRUE
LYPD3:O95274:OID21530	OID21530	O95274	LYPD3	0	0	Oncology	LYPD3	19	43995275	rs2599442	G	A	A	G	0.140598	569	0.4006	0.0862024	4.2e-06	19	43964939	43969812	LYPD3 (Pietzner 2021)	TRUE	TRUE
PVR:P15151:OID21011	OID21011	P15151	PVR	0	0	Neurology	PVR	19	45154340	rs10410915	G	A	G	A	0.316176	272	-0.572247	0.0777031	2.29e-12	19	45147098	45166850	----	FALSE	TRUE
CEACAM16:Q2WEN9:OID31495	OID31495	Q2WEN9	CEACAM16	0	0	Oncology_II	CEACAM16	19	45195238	rs75077269	A	C	C	A	0.0422222	450	-0.694595	0.165661	3.33e-05	19	45202421	45213986	----	NA	FALSE
NECTIN2:Q92692:OID20222	OID20222	Q92692	NECTIN2	0	0	Cardiometabolic	NECTIN2	19	45361224	rs440277	G	A	A	G	0.336842	570	-0.268487	0.0558554	1.97e-06	19	45349432	45392485	NECTIN2 (Pietzner 2021, p=5.75e-7)	TRUE	TRUE
APOE:P02649:OID30727	OID30727	P02649	APOE	0	0	Inflammation_II	APOE	19	45411941	rs429358	T	C	C	T	0.146341	451	-1.00137	0.0757152	7.06e-34	19	45409011	45412650	APOE (PMID: 23487758, PMID: 23894628, PMID: 28240269, Pietzner 2021)	TRUE	TRUE
HSD17B14:Q9BPX1:OID31098	OID31098	Q9BPX1	HSD17B14	1	0.005	Neurology_II	HSD17B14	19	49294842	rs71370202	G	A	A	G	0.0468198	566	-1.19972	0.12977	4.96e-19	19	49316274	49339935	HSD17B14 (Pietzner 2021)	TRUE	TRUE
HSD17B14:Q9BPX1:OID31098	OID31098	Q9BPX1	HSD17B14	0	0.005	Neurology_II	HSD17B14	19	49368843	rs506425	T	C	C	T	0.250552	453	-0.318141	0.073662	1.94e-05	19	49316274	49339935	HSD17B14 (Pietzner 2021)	TRUE	TRUE
DKKL1:Q9UK85:OID21313	OID21313	Q9UK85	DKKL1	0	0.005	Oncology	DKKL1	19	49891633	rs9304685	C	G	G	C	0.459649	570	-0.942141	0.0426377	2.63e-78	19	49865040	49878373	DKKL1 (Pietzner 2021, p=2.47e-6)	TRUE	TRUE
TBC1D17:Q9HA65:OID20844	OID20844	Q9HA65	TBC1D17	0	0.1355	Neurology	TBC1D17	19	50377757	rs4802634	C	T	T	C	0.417989	567	0.315878	0.0583949	9.4e-08	19	50380682	50392005	TBC1D17 (Pietzner 2021)	NA	TRUE
CLEC11A:Q9Y240:OID21112	OID21112	Q9Y240	CLEC11A	0	0	Neurology	CLEC11A	19	51211666	rs117942370	G	T	T	G	0.0256637	565	0.770836	0.177783	1.72e-05	19	51226586	51228974	----	FALSE	TRUE
KLK15:Q9H2R5:OID31427	OID31427	Q9H2R5	KLK15	1	0.0067	Oncology_II	KLK15	19	51322312	rs5519	T	C	C	T	0.29386	570	-0.355874	0.0614608	1.17e-08	19	51328545	51340469	----	FALSE	TRUE
KLK1:P06870:OID21499	OID21499	P06870	KLK1	0	0	Oncology	KLK1	19	51323473	rs5516	C	G	C	G	0.314035	570	-0.272394	0.0625706	1.59e-05	19	51322404	51327043	----	NA	FALSE
KLK15:Q9H2R5:OID31427	OID31427	Q9H2R5	KLK15	0	0.0067	Oncology_II	KLK15	19	51340722	rs77047554	G	A	A	G	0.0815789	570	1.02631	0.0906284	6.46e-27	19	51328545	51340469	KLK15 (Pietzner 2021, p = 8.67e-5)	FALSE	TRUE
KLK4:Q9Y5K2:OID21391	OID21391	Q9Y5K2	KLK4	0	0	Oncology	KLK4	19	51375716	rs3760731	C	T	T	C	0.0379189	567	0.688411	0.143396	2.03e-06	19	51409608	51413994	----	FALSE	TRUE
SIGLEC7:Q9Y286:OID20190	OID20190	Q9Y286	SIGLEC7	0	0	Cardiometabolic	SIGLEC7	19	51473947	rs1654535	T	C	T	C	0.318421	570	0.252598	0.0567939	1.05e-05	19	51645556	51656783	----	FALSE	TRUE
KLK6:Q92876:OID21526	OID21526	Q92876	KLK6	0	0	Oncology	KLK6	19	51474543	rs1701951	A	G	A	G	0.349123	570	0.257597	0.058794	1.41e-05	19	51461887	51472929	----	FALSE	TRUE	KLK7; KLK10 (Pitzner 2021)
KLK10:O43240:OID21523	OID21523	O43240	KLK10	0	0	Oncology	KLK10	19	51523203	rs2569454	T	C	T	C	0.434211	570	-0.467988	0.056285	6.99e-16	19	51515995	51523431	KLK10 (Emilsson, Pitzner 2021)	TRUE	TRUE
KLK12:Q9UKR0:OID21201	OID21201	Q9UKR0	KLK12	0	0.2759	Oncology	KLK12	19	51535130	rs3745540	A	G	A	G	0.430702	570	0.832676	0.0489665	1.31e-52	19	51532348	51538486	KLK12 (Sun, PMID: 29234017, Pitzner 2021)	TRUE	TRUE
KLK13:Q9UKR3:OID21291	OID21291	Q9UKR3	KLK13	0	0	Oncology	KLK13	19	51538561	rs3760739	G	T	T	G	0.354386	570	-0.411255	0.0580796	4.3e-12	19	51559463	51568371	KLK13 (Emilsson, Pitzner 2021)	TRUE	TRUE
KLK14:Q9P0G3:OID21407	OID21407	Q9P0G3	KLK14	0	0	Oncology	KLK14	19	51584916	rs2569491	G	A	A	G	0.285088	570	0.441761	0.0632317	8.02e-12	19	51580752	51587502	KLK14 (Sun, Emilsson, Pitzner 2021)	TRUE	TRUE
SIGLEC9:Q9Y336:OID21390	OID21390	Q9Y336	SIGLEC9	0	0	Oncology	SIGLEC9	19	51628529	rs2075803	A	G	A	G	0.464035	570	0.542707	0.0525733	5.45e-23	19	51628165	51639908	SIGLEC9 (Suhre, Sun, PMID: 22595970, PMID: 28129359, Pietzner 2021)	TRUE	TRUE
CD33:P20138:OID21472	OID21472	P20138	CD33	0	0.0401	Oncology	CD33	19	51728641	rs2455069	A	G	G	A	0.415789	570	0.944378	0.0439586	3.7e-75	19	51728320	51747115	CD33 (PMID: 30072576, Sun 2018, Suhre et al, Nat Comms 2017)	TRUE	TRUE
SIGLEC10:Q96LC7:OID20537	OID20537	Q96LC7	SIGLEC10	0	0	Inflammation	SIGLEC10	19	51917735	rs1974821	G	A	A	G	0.144592	453	-0.463518	0.0869907	1.58e-07	19	51913275	51921057	----	NA	TRUE	SIGLEC12 (Pietzner 2021)
SIGLEC8:Q9NYZ4:OID30261	OID30261	Q9NYZ4	SIGLEC8	0	0	Cardiometabolic_II	SIGLEC8	19	51930706	rs1820112	A	C	A	C	0.134658	453	0.462626	0.0944848	1.37e-06	19	51954101	51961710	----	FALSE	TRUE
SIGLEC6:O43699:OID21394	OID21394	O43699	SIGLEC6	0	0	Oncology	SIGLEC6	19	52035182	rs12609771	A	C	C	A	0.165556	450	0.430897	0.0866306	9.42e-07	19	52022779	52035110	SIGLEC6 (Pietzner 2021)	TRUE	TRUE
SIGLEC5:O15389:OID21082	OID21082	O15389	SIGLEC5	0	0.0401	Neurology	SIGLEC5	19	52165997	rs73052877	C	T	T	C	0.104381	388	-0.64999	0.105332	1.75e-09	19	52114781	52150151	SIGLEC5 (Pietzner 2021)	TRUE	TRUE
VSTM1:Q6UX27:OID20851	OID20851	Q6UX27	VSTM1	0	0.3562	Neurology	VSTM1	19	54545531	rs2433724	T	C	C	T	0.419426	453	-0.467007	0.0651129	3.11e-12	19	54544079	54567207	VSTM1 (Pietzner 2021, p=0.0121)	FALSE	TRUE
OSCAR:Q8IYS5:OID20776	OID20776	Q8IYS5	OSCAR	0	0	Inflammation	OSCAR	19	54579363	rs4806706	C	A	C	A	0.280353	453	-0.496004	0.0695705	4.11e-12	19	54597933	54606000	----	FALSE	TRUE
LILRB5:O75023:OID20324	OID20324	O75023	LILRB5	1	0	Cardiometabolic	LILRB5	19	54748760	rs635711	G	T	T	G	0.452206	272	0.672309	0.0775582	4.57e-16	19	54754263	54761164	LILRB5 (Pietzner 2021, p=1.11E-7)	TRUE	TRUE
LILRA6:Q6PI73:OID30346	OID30346	Q6PI73	LILRA6	0	0	Cardiometabolic_II	LILRA6	19	54752836	rs35573925	C	T	T	C	0.0972222	180	1.11157	0.146106	1.78e-12	19	54720737	54746649	LILRA6 (PMID: 29875488, Pitzner 2021)	TRUE	TRUE
LILRB5:O75023:OID20324	OID20324	O75023	LILRB5	1	0	Cardiometabolic	LILRB5	19	54754103	rs11668189	C	A	A	C	0.352097	453	-0.775642	0.0583974	3.91e-34	19	54754263	54761164	LILRB5 (Pietzner 2021)	TRUE	TRUE
LILRB2:Q8N423:OID20301	OID20301	Q8N423	LILRB2	1	0	Cardiometabolic	LILRB2	19	54781010	rs3855678	T	C	C	T	0.310662	272	-0.583129	0.0881439	2.06e-10	19	54777675	54785039	LILRB2 (Pietzner 2021)	TRUE	TRUE
LILRB5:O75023:OID20324	OID20324	O75023	LILRB5	0	0	Cardiometabolic	LILRB5	19	54800667	rs6509861	C	T	C	T	0.448529	272	-0.475717	0.0847	4.95e-08	19	54754263	54761164	LILRB5 (Pietzner 2021)	TRUE	TRUE
LILRB2:Q8N423:OID20301	OID20301	Q8N423	LILRB2	0	0	Cardiometabolic	LILRB2	19	54814602	rs1761456	C	A	A	C	0.313466	453	-0.384366	0.0685403	3.61e-08	19	54777675	54785039	LILRB2 (Pietzner 2021)	TRUE	TRUE
LILRB1:Q8NHL6:OID20323	OID20323	Q8NHL6	LILRB1	1	0	Cardiometabolic	LILRB1	19	54821448	rs1645786	A	G	G	A	0.482394	568	-0.238422	0.0567528	3.09e-05	19	55085346	55148979	----	FALSE	TRUE	LILRB2 (Pietzner 2021)
LAIR1:Q6GTX8:OID20737	OID20737	Q6GTX8	LAIR1	0	0	Inflammation	LAIR1	19	54857911	rs10418607	C	A	C	A	0.427152	453	-0.35633	0.0556128	3.78e-10	19	54865362	54882165	----	FALSE	TRUE
LILRA2:Q8N149:OID21152	OID21152	Q8N149	LILRA2	0	0	Neurology	LILRA2	19	55075026	rs10409108	A	C	C	A	0.112478	569	-0.734968	0.082464	7e-18	19	55084387	55099027	LILRA2 (Pitzner 2021)	TRUE	TRUE
LILRB1:Q8NHL6:OID20323	OID20323	Q8NHL6	LILRB1	0	0	Cardiometabolic	LILRB1	19	55136903	rs111839477	C	T	T	C	0.0875831	451	0.656758	0.112139	9.23e-09	19	55085346	55148979	LILRB1 (Pietzner 2021)	TRUE	TRUE
KIR2DL3:P43628:OID21196	OID21196	P43628	KIR2DL3	0	0.005	Oncology	KIR2DL3	19	55211029	rs17698958	A	C	C	A	0.0666667	570	-0.44922	0.113881	9.01e-05	19	55249980	55295776	KIR2DL3 (Pietzner 2021, p=0.0010)	FALSE	TRUE
KIR2DS4:P43632:OID31432	OID31432	P43632	KIR2DS4	0	0.2676	Oncology_II	KIR2DS4	19	55382490	rs61137200	T	C	C	T	0.116667	450	0.910272	0.102485	1.67e-17	19	55344131	55360024	----	FALSE	TRUE	KIR2DL5A; KIR2DL3; KIR2DS2 (Pitzner 2021)
FCAR:P24071:OID20564	OID20564	P24071	FCAR	0	0	Inflammation	FCAR	19	55397217	rs1865097	A	G	A	G	0.3234	453	0.555073	0.0670746	1.51e-15	19	55385704	55401838	----	FALSE	TRUE
GP6:Q9HCN6:OID21091	OID21091	Q9HCN6	GP6	0	0	Neurology	GP6	19	55525008	rs1654411	A	C	A	C	0.162852	568	-0.348702	0.0758661	5.32e-06	19	55525073	55549632	GP6 (Pietzner 2021)	TRUE	TRUE
PTPRH:Q9HD43:OID31433	OID31433	Q9HD43	PTPRH	0	0.0017	Oncology_II	PTPRH	19	55699646	rs3803904	C	T	T	C	0.143177	447	0.783732	0.0917263	2.17e-16	19	55692616	55720874	----	FALSE	TRUE
SIRPB1:O00241:OID20739	OID20739	O00241	SIRPB1	0	0	Inflammation	SIRPB1	20	1496473	rs976192	C	A	C	A	0.289823	452	-0.57635	0.0670053	1.37e-16	20	1544167	1600707	SIRPB1 (Pietzner 2021)	TRUE	TRUE
SIRPA:P78324:OID20304	OID20304	P78324	SIRPA	0	0	Cardiometabolic	SIRPA	20	1894335	rs6075340	G	A	A	G	0.369757	453	-1.0387	0.04414	4.37e-80	20	1875154	1920543	SIRPA (Emilsson, Sun, Pietzner 2021)	TRUE	TRUE
CPXM1:Q96SM3:OID21479	OID21479	Q96SM3	CPXM1	0	0	Oncology	CPXM1	20	2780151	rs215543	G	A	G	A	0.258772	570	-0.293522	0.065366	8.63e-06	20	2774715	2781283	CPXM1 (Pietzner 2021)	TRUE	TRUE
SIGLEC1:Q9BZZ2:OID20690	OID20690	Q9BZZ2	SIGLEC1	0	0	Inflammation	SIGLEC1	20	2893511	rs572763	G	A	A	G	0.0828924	567	0.425141	0.102493	3.88e-05	20	3667617	3687775	----	FALSE	TRUE
ITPA:Q9BY32:OID30082	OID30082	Q9BY32	ITPA	0	0.5033	Cardiometabolic_II	ITPA	20	3182893	rs6051640	C	T	T	C	0.0722222	450	-1.12807	0.115788	1.92e-20	20	3189514	3204516	ITPA (Pietzner 2021)	TRUE	TRUE
ATRN:O75882-2:OID30735	OID30735	O75882-2	ATRN	0	0	Inflammation_II	ATRN	20	3484548	rs151544	G	C	C	G	0.0599647	567	-0.976432	0.109816	8.34e-18	20	3451687	3631769	ATRN (Pietzner 2021)	NA	TRUE
CHGB:P05060:OID21038	OID21038	P05060	CHGB	0	0	Neurology	CHGB	20	5901863	rs4813784	G	C	C	G	0.368363	452	-0.634443	0.0549491	3.86e-27	20	5892076	5906007	CHGB (Pietzner 2021)	TRUE	TRUE
CST1:P01037:OID30581	OID30581	P01037	CST1	0	0.01	Inflammation_II	CST1	20	23744035	rs74424357	G	A	A	G	0.0597345	452	-0.584044	0.138592	3.04e-05	20	23728190	23731905	CST1 (Pietzner 2021)	TRUE	TRUE
CST5:P28325:OID20995	OID20995	P28325	CST5	0	0	Neurology	CST5	20	23853181	rs4642010	C	A	A	C	0.178445	566	0.679577	0.0672462	3.69e-22	20	23856572	23860387	CST5 (Pietzner 2021)	TRUE	TRUE
CST7:O76096:OID20704	OID20704	O76096	CST7	0	0	Inflammation	CST7	20	24899905	rs2387361	C	T	C	T	0.207506	453	-0.703059	0.0755456	6.11e-19	20	24929866	24940564	CST7 (Pietzner 2021)	TRUE	TRUE
ENTPD6:O75354:OID20100	OID20100	O75354	ENTPD6	0	0	Cardiometabolic	ENTPD6	20	25195509	rs6050446	A	G	A	G	0.0306122	294	-2.08588	0.201048	1.33e-21	20	25176329	25207365	ENTPD6 (Pietzner 2021)	TRUE	TRUE
BPIFB2:Q8N4F0:OID30311	OID30311	Q8N4F0	BPIFB2	0	0.0017	Cardiometabolic_II	BPIFB2	20	31583578	rs73119670	C	T	T	C	0.0411111	450	-0.723809	0.15969	7.52e-06	20	31595406	31611515	----	NA	TRUE	BPIFB1 (Pietzner 2021)
PROCR:Q9UNN8:OID30149	OID30149	Q9UNN8	PROCR	0	0.6338	Cardiometabolic_II	PROCR	20	33664583	rs8116257	C	G	G	C	0.117229	563	0.813892	0.0858517	7.37e-20	20	33759876	33765165	----	FALSE	TRUE	PROC (Pitzner 2021)
TGM2:P21980:OID20141	OID20141	P21980	TGM2	0	0	Cardiometabolic	TGM2	20	36803692	rs8116328	A	T	A	T	0.391832	453	-0.28844	0.0636292	7.48e-06	20	36756863	36794980	TGM2 (Pietzner 2021)	TRUE	TRUE
ADA:P00813:OID20645	OID20645	P00813	ADA	1	0	Inflammation	ADA	20	43255847	rs113093932	G	C	C	G	0.0545685	394	1.17195	0.14176	2.25e-15	20	43248163	43280874	----	NA	FALSE
ADA:P00813:OID20645	OID20645	P00813	ADA	0	0	Inflammation	ADA	20	43273390	rs6031690	A	G	A	G	0.431338	568	0.228334	0.0577804	8.75e-05	20	43248163	43280874	----	NA	FALSE
CCN5:O76076:OID21068	OID21068	O76076	CCN5	0	0	Neurology	CCN5	20	43325660	rs2038893	G	A	A	G	0.430464	453	-0.283774	0.0610986	4.5e-06	20	43343485	43357150	----	FALSE	TRUE
SPINT3:P49223:OID31509	OID31509	P49223	SPINT3	0	0.1221	Oncology_II	SPINT3	20	44144478	rs8124864	G	A	A	G	0.484875	562	-0.44835	0.0548691	2.09e-15	20	44141101	44144264	SPINT3 (Pietzner 2021)	TRUE	TRUE
PLTP:P55058:OID20238	OID20238	P55058	PLTP	0	0	Cardiometabolic	PLTP	20	44534651	rs6065904	G	A	A	G	0.246491	570	-0.528851	0.0615541	8.51e-17	20	44527399	44540794	PLTP (Pietzner 2021)	TRUE	TRUE
CD40:P25942:OID20724	OID20724	P25942	CD40	0	0	Inflammation	CD40	20	44730245	rs6032660	G	A	G	A	0.256071	453	-0.651991	0.0671051	2.32e-20	20	44746911	44758502	----	NA	FALSE
PTPN1:P18031:OID20908	OID20908	P18031	PTPN1	0	0	Neurology	PTPN1	20	49495389	rs6096152	G	A	A	G	0.357778	450	-0.280039	0.0686578	5.37e-05	20	49126891	49201299	----	FALSE	TRUE
CBLN4:Q9NTU7:OID21386	OID21386	Q9NTU7	CBLN4	0	0	Oncology	CBLN4	20	54422639	rs11906651	C	T	T	C	0.179646	565	-0.352821	0.0789455	9.52e-06	20	54572496	54580528	CBLN4 (Pietzner 2021)	TRUE	TRUE
OGFR:Q9NZT2:OID21360	OID21360	Q9NZT2	OGFR	0	0	Oncology	OGFR	20	61454583	rs114463443	A	T	T	A	0.0366667	450	-0.700882	0.167431	3.43e-05	20	61436187	61445352	----	NA	FALSE
NCAM2:O15394:OID21095	OID21095	O15394	NCAM2	0	0	Neurology	NCAM2	21	22835946	rs2826851	A	G	G	A	0.264085	568	0.60459	0.0589665	1.02e-22	21	22370633	22915650	NCAM2 (Emilsson, Pietzner 2021)	TRUE	TRUE
IL10RB:Q08334:OID20696	OID20696	Q08334	IL10RB	0	0	Inflammation	IL10RB	21	34652457	rs2843701	C	T	T	C	0.461131	566	0.386	0.0510366	1.63e-13	21	34638663	34669539	IL10RB (Pietzner 2021)	TRUE	TRUE
IFNAR1:P17181:OID31491	OID31491	P17181	IFNAR1	0	0	Oncology_II	IFNAR1	21	34682069	rs1467849	G	T	G	T	0.307624	564	-0.338067	0.0641651	1.97e-07	21	34696734	34732168	----	FALSE	TRUE
IFNGR2:P38484:OID20941	OID20941	P38484	IFNGR2	0	0	Neurology	IFNGR2	21	34836411	rs4817573	A	G	A	G	0.111111	450	1.14157	0.0926775	3.61e-30	21	34775202	34851655	IFNGR2 (Pietzner 2021, p = 0.0482)	FALSE	TRUE
FAM3B:P58499:OID21372	OID21372	P58499	FAM3B	0	0	Oncology	FAM3B	21	42721107	rs17000823	A	C	C	A	0.0320088	453	-0.763161	0.181251	3.09e-05	21	42676139	42729358	FAM3B (Pietzner 2021)	TRUE	TRUE
CSTB:P04080:OID20294	OID20294	P04080	CSTB	0	0	Cardiometabolic	CSTB	21	45232950	rs6518324	A	G	G	A	0.412544	566	-0.501144	0.0525214	4.36e-20	21	45192393	45196326	----	NA	FALSE
ICOSLG:O75144:OID21351	OID21351	O75144	ICOSLG	0	0	Oncology	ICOSLG	21	45752176	rs3761392	A	C	A	C	0.175497	453	0.370483	0.0871562	2.6e-05	21	45642874	45660849	ICOSLG (Pietzner 2021, p=0.0446)	FALSE	TRUE
COL18A1:P39060:OID20332	OID20332	P39060	COL18A1	1	0	Cardiometabolic	COL18A1	21	46897214	rs9976834	C	T	T	C	0.182522	452	-0.305378	0.073147	3.59e-05	21	46825052	46933634	COL18A1 (Pietzner 2021)	TRUE	TRUE
COL18A1:P39060:OID20332	OID20332	P39060	COL18A1	0	0	Cardiometabolic	COL18A1	21	46931109	rs12483377	G	A	A	G	0.0798246	570	0.379939	0.0914758	3.79e-05	21	46825052	46933634	COL18A1 (Pietzner 2021)	TRUE	TRUE
IL17RA:Q96F46:OID21089	OID21089	Q96F46	IL17RA	0	0	Neurology	IL17RA	22	17585808	rs721930	G	C	C	G	0.214953	214	0.703749	0.108591	6.67e-10	22	17565844	17596583	IL17RA (Pitzner 2021)	TRUE	TRUE
COMT:P21964:OID20086	OID20086	P21964	COMT	0	0	Cardiometabolic	COMT	22	19948863	rs165656	G	C	G	C	0.457597	566	0.549046	0.0556029	2.67e-21	22	19929130	19957498	COMT (Pietzner 2021)	TRUE	TRUE
RTN4R:Q9BZR6:OID21424	OID21424	Q9BZR6	RTN4R	0	0	Oncology	RTN4R	22	20172406	rs632194	C	T	C	T	0.188196	449	0.470331	0.0788224	4.98e-09	22	20228938	20270769	RTN4R (Pietzner 2021)	TRUE	TRUE
SNAP29:O95721:OID21506	OID21506	O95721	SNAP29	0	0	Oncology	SNAP29	22	22017472	rs442422	T	A	T	A	0.0266667	450	0.826508	0.203882	5.96e-05	22	21213271	21245506	----	FALSE	TRUE
GSTT2B:P0CG30:OID31097	OID31097	P0CG30	GSTT2B	1	0	Neurology_II	GSTT2B	22	24249021	rs76771075	G	A	A	G	0.0202822	567	1.23409	0.206867	4.33e-09	22	24299601	24303373	GSTT2B (Pietzner 2021)	TRUE	TRUE
GSTT2B:P0CG30:OID31097	OID31097	P0CG30	GSTT2B	0	0	Neurology_II	GSTT2B	22	24260106	rs4461358	T	C	C	T	0.245011	451	0.695814	0.0730399	1.08e-19	22	24299601	24303373	GSTT2B (Pietzner 2021)	TRUE	TRUE
SUSD2:Q9UGT4:OID21098	OID21098	Q9UGT4	SUSD2	0	0	Neurology	SUSD2	22	24474704	rs5760201	G	A	G	A	0.0387168	452	0.995819	0.155839	4.21e-10	22	24577227	24585078	----	NA	FALSE
TCN2:P20062:OID20341	OID20341	P20062	TCN2	0	0	Cardiometabolic	TCN2	22	31002638	rs13058138	G	A	A	G	0.2051	451	0.62457	0.0735407	3.1e-16	22	31002825	31023265	TCN2 (Pietzner 2021)	TRUE	TRUE
PIK3IP1:Q96FE7:OID21094	OID21094	Q96FE7	PIK3IP1	0	0	Neurology	PIK3IP1	22	31630896	rs5997921	G	T	T	G	0.13245	453	-0.483626	0.0838576	1.51e-08	22	31677579	31688520	----	NA	FALSE
TIMP3:P35625:OID20684	OID20684	P35625	TIMP3	0	0	Inflammation	TIMP3	22	33167851	rs2899194	T	C	T	C	0.286504	452	0.678071	0.0651018	7.19e-23	22	33197687	33259030	TIMP3 (Pietzner 2021)	TRUE	TRUE
CSF2RB:P32927:OID30553	OID30553	P32927	CSF2RB	0	0	Inflammation_II	CSF2RB	22	37328751	rs2075936	A	G	G	A	0.492982	570	-0.854415	0.0463033	8.99e-60	22	37309670	37336491	CSF2RB (Sun, Emilsson)	TRUE	TRUE
LGALS1:P09382:OID20154	OID20154	P09382	LGALS1	0	0	Cardiometabolic	LGALS1	22	38066135	rs8135778	A	G	A	G	0.416107	447	0.329381	0.0560642	8.37e-09	22	38071615	38075813	----	FALSE	TRUE	LGALS2 (Pietzner 2021)
NPTXR:O95502:OID20191	OID20191	O95502	NPTXR	0	0	Cardiometabolic	NPTXR	22	39242523	rs111922533	A	T	T	A	0.016835	297	2.06113	0.289973	9.3e-12	22	39214457	39239987	NPTXR (PMID: 33303764, Pietzner 2021)	TRUE	TRUE
TNFRSF13C:Q96RJ3:OID20480	OID20480	Q96RJ3	TNFRSF13C	0	0.0117	Inflammation	TNFRSF13C	22	42341363	rs73165153	G	A	A	G	0.0799649	569	-0.638601	0.0973357	1.22e-10	22	42321045	42322822	----	FALSE	TRUE
ATXN10:Q9UBB4:OID20865	OID20865	Q9UBB4	ATXN10	1	0.3779	Neurology	ATXN10	22	45618167	rs5766559	G	A	A	G	0.352097	453	0.298161	0.0724437	4.6e-05	22	46067678	46241187	----	NA	FALSE
ATXN10:Q9UBB4:OID20865	OID20865	Q9UBB4	ATXN10	0	0.3779	Neurology	ATXN10	22	46177446	rs58917892	T	A	A	T	0.329268	451	0.331954	0.0794064	3.51e-05	22	46067678	46241187	----	NA	FALSE
CRELD2:Q6UXH1:OID20751	OID20751	Q6UXH1	CRELD2	0	0	Inflammation	CRELD2	22	50278438	rs910798	A	G	A	G	0.0878735	569	0.476181	0.0978829	1.49e-06	22	50311815	50321188	----	NA	FALSE
PLXNB2:O15031:OID20317	OID20317	O15031	PLXNB2	0	0	Cardiometabolic	PLXNB2	22	50844551	rs140471796	C	T	T	C	0.0763274	452	-0.643846	0.113599	2.61e-08	22	50713408	50746056	PLXNB2 (Pietzner 2021)	TRUE	TRUE
TYMP:P19971:OID20234	OID20234	P19971	TYMP	0	0	Cardiometabolic	TYMP	22	51017082	rs131758	T	A	T	A	0.401766	453	-0.312924	0.0650343	2.05e-06	22	50964181	50968485	----	FALSE	TRUE
ARSA:P15289:OID21138	OID21138	P15289	ARSA	0	0	Neurology	ARSA	22	51038241	rs9628223	A	G	G	A	0.0199557	451	1.45251	0.215617	5.07e-11	22	51061182	51066607	ARSA (PMID: 36168886, Pietzner 2021)	TRUE	TRUE

## Sheet: ST2
protein	risk factor	OpenGWAS identifier	beta	se	pval
CD160	Age at menarche	id:ukb-b-3768 (ukb-b-3768)	-0.0125	0.0064	0.0492
DNPH1	Age at menarche	id:ukb-b-3768 (ukb-b-3768)	0.0102	0.0049	0.0365
LAYN	Age at menarche	id:ukb-b-3768 (ukb-b-3768)	0.0235	0.0099	0.0175
LRRC37A2	Age at menarche	id:ukb-b-3768 (ukb-b-3768)	0.0112	0.0024	3.57e-06
TLR1	Age at menarche	id:ukb-b-3768 (ukb-b-3768)	-0.006	0.0055	0.279
CD160	Age at menarche	ieu-a-1095 (ieu-a-1095)	-0.0395	0.0181	0.029
LAYN	Age at menarche	ieu-a-1095 (ieu-a-1095)	0.0397	0.0276	0.15
LRRC37A2	Age at menarche	ieu-a-1095 (ieu-a-1095)	0.0117	0.0069	0.092
TLR1	Age at menarche	ieu-a-1095 (ieu-a-1095)	-0.0248	0.0147	0.091
CD160	Waist/Hip ratio	ieu-a-73 (ieu-a-73)	0.0015	0.0128	0.905
LAYN	Waist/Hip ratio	ieu-a-73 (ieu-a-73)	-0.0608	0.0201	0.0025
LRRC37A2	Waist/Hip ratio	ieu-a-73 (ieu-a-73)	0.0117	0.0051	0.021
TLR1	Waist/Hip ratio	ieu-a-73 (ieu-a-73)	-0.0068	0.0103	0.509
CD160	SHGB	ieu-b-4870 (ieu-b-4870)	0.0024	0.0091	0.788
DNPH1	SHGB	ieu-b-4870 (ieu-b-4870)	0.0033	0.007	0.638
LAYN	SHGB	ieu-b-4870 (ieu-b-4870)	-0.0102	0.0142	0.47
LRRC37A2	SHGB	ieu-b-4870 (ieu-b-4870)	0.0078	0.0034	0.0228
TLR1	SHGB	ieu-b-4870 (ieu-b-4870)	-0.0012	0.0079	0.88
CD160	Age at menopause	ieu-a-1004 (ieu-a-1004)	0	0.0608	1
LAYN	Age at menopause	ieu-a-1004 (ieu-a-1004)	0.0935	0.0935	0.317
LRRC37A2	Age at menopause	ieu-a-1004 (ieu-a-1004)	-0.1072	0.0292	0.000246
TLR1	Age at menopause	ieu-a-1004 (ieu-a-1004)	0.0207	0.0413	0.617
CD160	Age at menopause	ukb-b-17422 (ukb-b-17422)	0.0009	0.0114	0.936
DNPH1	Age at menopause	ukb-b-17422 (ukb-b-17422)	-0.0087	0.0087	0.318
LAYN	Age at menopause	ukb-b-17422 (ukb-b-17422)	0.0162	0.0176	0.357
LRRC37A2	Age at menopause	ukb-b-17422 (ukb-b-17422)	-0.0157	0.0043	0.000258
TLR1	Age at menopause	ukb-b-17422 (ukb-b-17422)	0.002	0.0099	0.836
CD160	IGF-I level	ukb-d-30770_irnt	0.0117	0.0072	0.104
DNPH1	IGF-I level	ukb-d-30770_irnt	-0.0132	0.0055	0.0152
LAYN	IGF-I level	ukb-d-30770_irnt	0.0145	0.0111	0.192
LRRC37A2	IGF-I level	ukb-d-30770_irnt	0.0166	0.0027	8.04e-10
TLR1	IGF-I level	ukb-d-30770_irnt	0.0065	0.0063	0.305
CD160	Breast density				0.3311
DNPH1	Breast density				0.9142
LAYN	Breast density				0.5265
LRRC37A2	Breast density				0.4435
TLR1	Breast density				0.8999

## Sheet: ST3
panel	N matching genes	Genes < 70% missing	% genes <70% missing	Mean (mg_L)	Median (mg/L)	SD (mg/L)	min (mg/L)	max (mg/L)	Max gene	Min gene
Inflammation_II	139	136	97.8	14.306	0.057	30.986	1.1e-05	200	C3	IL36G, ADAMTS4
Cardiometabolic	175	170	97.1	0.396	0.0065	1.362	1e-05	10	CD14	REN
Oncology	123	119	96.8	0.394	0.00033	4.237	1e-05	47	AMBP	NCS1
Inflammation	103	98	95.2	0.0397	0.00068	0.269	8.7e-06	2.7	C1QA	DFFA
Neurology	134	127	94.8	0.391	0.00145	3.554	8.5e-06	41	APOH	CLPP
Cardiometabolic_II	126	106	84.1	0.0329	0.00087	0.114	1.2e-05	0.98	PROCR	HSBP1
Oncology_II	55	41	74.6	0.00176	0.00016	0.00854	7.9e-06	0.063	HSPA2	SDHB
Neurology_II	52	31	59.6	0.0563	0.000185	0.258	5.2e-06	1.7	KRT8	SPRR3

## Sheet: ST4
exposure	GeneName	method	nsnp	beta	se	pval	assay	CHROM	OlinkID	UniProt	Panel
LRRC37A2_OID31440_CIS_IVs	LRRC37A2	Wald ratio	1	-0.0459154	0.00740885	5.7415e-10	LRRC37A2	17	OID31440	A6NM11	Oncology_II
DNPH1_OID20744_CIS_IVs	DNPH1	Wald ratio	1	0.0757592	0.0149101	3.75293e-07	DNPH1	6	OID20744	O43598	Inflammation
CD160_OID20647_CIS_IVs	CD160	Wald ratio	1	-0.094557	0.0197627	1.71315e-06	CD160	1	OID20647	O95971	Inflammation
TXK_OID31262_CIS_IVs	TXK	Wald ratio	1	0.0737891	0.0158302	3.14233e-06	TXK	4	OID31262	P42681	Oncology_II
TLR1_OID30532_CIS_IVs	TLR1	Wald ratio	1	0.0709013	0.0157099	6.38694e-06	TLR1	4	OID30532	Q15399	Inflammation_II
LAYN_OID20970_CIS_IVs	LAYN	Wald ratio	1	0.128051	0.0294423	1.36631e-05	LAYN	11	OID20970	Q6UX15	Neurology
MST1_OID30713_CIS_IVs	MST1	Wald ratio	1	0.0287518	0.00724118	7.16954e-05	MST1	3	OID30713	P26927	Inflammation_II
CRX_OID20070_CIS_IVs	CRX	Wald ratio	1	-0.0678155	0.0177486	0.000132968	CRX	19	OID20070	O43186	Cardiometabolic
EIF2AK3_OID30060_CIS_IVs	EIF2AK3	Wald ratio	1	-0.0935701	0.0245851	0.000141249	EIF2AK3	2	OID30060	Q9NZJ5	Cardiometabolic_II
TNC_OID20359_CIS_IVs	TNC	Wald ratio	1	-0.0570104	0.0150986	0.000159455	TNC	9	OID20359	P24821	Cardiometabolic
EFNA1_OID21125_CIS_IVs	EFNA1	Wald ratio	1	-0.0649914	0.0172938	0.000171233	EFNA1	1	OID21125	P20827	Neurology
PLG_OID30785_CIS_IVs	PLG	Wald ratio	1	0.0805844	0.0215064	0.000178971	PLG	6	OID30785	P00747	Inflammation_II
HMCN2_OID30592_CIS_IVs	HMCN2	Wald ratio	1	0.0800211	0.0219517	0.000267059	HMCN2	9	OID30592	Q8NDA2	Inflammation_II
RAB10_OID30357_CIS_IVs	RAB10	Wald ratio	1	-0.0433335	0.0121934	0.000379641	RAB10	2	OID30357	P61026	Cardiometabolic_II
BTN3A2_OID20540_CIS_IVs	BTN3A2	Wald ratio	1	0.0379266	0.0107601	0.000423879	BTN3A2	6	OID20540	P78410	Inflammation
PDCD6_OID20163_CIS_IVs	PDCD6	Wald ratio	1	-0.0209083	0.00608477	0.00059	PDCD6	5	OID20163	O75340	Cardiometabolic
MEGF9_OID20285_CIS_IVs	MEGF9	Wald ratio	1	-0.0896444	0.0264941	0.000715521	MEGF9	9	OID20285	Q9H1U4	Cardiometabolic
AOC3_OID20389_CIS_IVs	AOC3	Wald ratio	1	-0.0455341	0.0134574	0.000715521	AOC3	17	OID20389	Q16853	Cardiometabolic
ITGB1_OID20376_CIS_IVs	ITGB1	Wald ratio	1	-0.0219685	0.0066291	0.000919868	ITGB1	10	OID20376	P05556	Cardiometabolic
UROD_OID30603_CIS_IVs	UROD	Wald ratio	1	0.0730927	0.0222054	0.000995956	UROD	1	OID30603	P06132	Inflammation_II
SHMT1_OID20714_CIS_IVs	SHMT1	IVW	2	0.0300417	0.00913242	0.0010034	SHMT1	17	OID20714	P34896	Inflammation
GIGYF2_OID31062_CIS_IVs	GIGYF2	Wald ratio	1	-0.0328802	0.0101678	0.00122169	GIGYF2	2	OID31062	Q6Y7W6	Neurology_II
GPHA2_OID31437_CIS_IVs	GPHA2	Wald ratio	1	0.0677722	0.0210038	0.00125241	GPHA2	11	OID31437	Q96T91	Oncology_II
BLNK_OID30541_CIS_IVs	BLNK	Wald ratio	1	0.0907356	0.0286327	0.00152991	BLNK	10	OID30541	Q8WV28	Inflammation_II
B4GAT1_OID21127_CIS_IVs	B4GAT1	Wald ratio	1	-0.085948	0.0272346	0.00160034	B4GAT1	11	OID21127	O43505	Neurology
AKR1B1_OID21244_CIS_IVs	AKR1B1	Wald ratio	1	-0.0790317	0.0251905	0.00170475	AKR1B1	7	OID21244	P15121	Oncology
LXN_OID21003_CIS_IVs	LXN	Wald ratio	1	0.0779004	0.0249123	0.00176609	LXN	3	OID21003	Q9BS40	Neurology
ASRGL1_OID30283_CIS_IVs	ASRGL1	Wald ratio	1	0.065181	0.0210261	0.00193521	ASRGL1	11	OID30283	Q7L266	Cardiometabolic_II
SCG3_OID20728_CIS_IVs	SCG3	Wald ratio	1	0.0314168	0.0101479	0.00196223	SCG3	15	OID20728	Q8WXD2	Inflammation
SPINK5_OID21148_CIS_IVs	SPINK5	Wald ratio	1	-0.047853	0.0154749	0.00198607	SPINK5	5	OID21148	Q9NQ38	Neurology
NECTIN2_OID20222_CIS_IVs	NECTIN2	Wald ratio	1	0.0770987	0.0249547	0.00200458	NECTIN2	19	OID20222	Q92692	Cardiometabolic
GPC5_OID20944_CIS_IVs	GPC5	IVW	2	0.0259818	0.00859044	0.00249042	GPC5	13	OID20944	P78333	Neurology
DXO_OID31080_CIS_IVs	DXO	Wald ratio	1	0.0448515	0.0149174	0.00264129	DXO	6	OID31080	O77932	Neurology_II
FAM172A_OID30248_CIS_IVs	FAM172A	Wald ratio	1	-0.0395978	0.0131993	0.0026998	FAM172A	5	OID30248	Q8WUF8	Cardiometabolic_II
MFAP3_OID20057_CIS_IVs	MFAP3	Wald ratio	1	0.067151	0.0227506	0.00316119	MFAP3	5	OID20057	P55082	Cardiometabolic
CLMP_OID21419_CIS_IVs	CLMP	Wald ratio	1	-0.0623548	0.0212006	0.00326968	CLMP	11	OID21419	Q9H6B4	Oncology
IMPACT_OID31112_CIS_IVs	IMPACT	Wald ratio	1	0.101291	0.0345448	0.0033662	IMPACT	18	OID31112	Q9P2X3	Neurology_II
CD2AP_OID20177_CIS_IVs	CD2AP	Wald ratio	1	0.0345745	0.0121011	0.00427473	CD2AP	6	OID20177	Q9Y5K6	Cardiometabolic
CD200R1_OID20595_CIS_IVs	CD200R1	IVW	2	-0.0232962	0.00825574	0.00477526	CD200R1	3	OID20595	Q8TD46	Inflammation
CD109_OID21108_CIS_IVs	CD109	IVW	2	-0.0227591	0.00810967	0.00500963	CD109	6	OID21108	Q6YHK3	Neurology
ADA_OID20645_CIS_IVs	ADA	IVW	2	0.0280007	0.0100176	0.00518779	ADA	20	OID20645	P00813	Inflammation
FUT3_FUT5_OID21013_CIS_IVs	FUT5	Wald ratio	1	0.0458061	0.0164305	0.00530544	FUT3_FUT5	19	OID21013	P21217_Q11128	Neurology
TFAP2A_OID30848_CIS_IVs	TFAP2A	Wald ratio	1	0.042179	0.0151678	0.00542215	TFAP2A	6	OID30848	P05549	Neurology_II
NUDT2_OID21308_CIS_IVs	NUDT2	Wald ratio	1	-0.0597563	0.0218068	0.00613906	NUDT2	9	OID21308	P50583	Oncology
FGFR4_OID30646_CIS_IVs	FGFR4	Wald ratio	1	0.0210261	0.0076981	0.00630767	FGFR4	5	OID30646	P22455	Inflammation_II
USP8_OID20110_CIS_IVs	USP8	Wald ratio	1	-0.0660441	0.0246327	0.00733676	USP8	15	OID20110	P40818	Cardiometabolic
SPAG1_OID30979_CIS_IVs	SPAG1	IVW	2	0.0314449	0.0117304	0.00734849	SPAG1	8	OID30979	Q07617	Neurology_II
AMY2A_OID20333_CIS_IVs	AMY2A	Wald ratio	1	0.0484806	0.0183184	0.00813171	AMY2A	1	OID20333	P04746	Cardiometabolic
AMY2B_OID20340_CIS_IVs	AMY2B	Wald ratio	1	0.0452429	0.017095	0.00813171	AMY2B	1	OID20340	P19961	Cardiometabolic
CCS_OID20973_CIS_IVs	CCS	Wald ratio	1	-0.0526171	0.0200331	0.00862665	CCS	11	OID20973	O14618	Neurology
NRP1_OID20390_CIS_IVs	NRP1	Wald ratio	1	-0.0396648	0.0152009	0.00907078	NRP1	10	OID20390	O14786	Cardiometabolic
LAMA4_OID20769_CIS_IVs	LAMA4	Wald ratio	1	0.0586926	0.0225741	0.00932238	LAMA4	6	OID20769	Q16363	Inflammation
TNPO1_OID31330_CIS_IVs	TNPO1	Wald ratio	1	-0.0111162	0.00429045	0.00957228	TNPO1	5	OID31330	Q92973	Oncology_II
SPINK6_OID21450_CIS_IVs	SPINK6	Wald ratio	1	-0.0424482	0.0164064	0.00967309	SPINK6	5	OID21450	Q6UWN8	Oncology
TFPI_OID20388_CIS_IVs	TFPI	Wald ratio	1	0.0319313	0.0104092	0.00999366	TFPI	2	OID20388	P10646	Cardiometabolic
FIS1_OID20722_CIS_IVs	FIS1	Wald ratio	1	-0.0493051	0.0191436	0.0100084	FIS1	7	OID20722	Q9Y3D6	Inflammation
CDH1_OID20353_CIS_IVs	CDH1	Wald ratio	1	-0.0985738	0.0383778	0.0102136	CDH1	16	OID20353	P12830	Cardiometabolic
HRAS_OID31263_CIS_IVs	HRAS	Wald ratio	1	0.0560162	0.0220064	0.0109136	HRAS	11	OID31263	P01112	Oncology_II
TOR1AIP1_OID30195_CIS_IVs	TOR1AIP1	Wald ratio	1	0.0425287	0.0168605	0.0116561	TOR1AIP1	1	OID30195	Q5JTV8	Cardiometabolic_II
ABO_OID30675_CIS_IVs	ABO	IVW	3	0.0109366	0.00435251	0.0119809	ABO	9	OID30675	P16442	Inflammation_II
TAFA5_OID21321_CIS_IVs	TAFA5	Wald ratio	1	-0.0264038	0.0105864	0.0126271	TAFA5	22	OID21321	Q7Z5A7	Oncology
PPIF_OID30385_CIS_IVs	PPIF	Wald ratio	1	0.0268293	0.0107952	0.0129444	PPIF	10	OID30385	P30405	Cardiometabolic_II
GM2A_OID30413_CIS_IVs	GM2A	Wald ratio	1	0.0326972	0.0131936	0.0132025	GM2A	5	OID30413	P17900	Cardiometabolic_II
NAPRT_OID31114_CIS_IVs	NAPRT	Wald ratio	1	-0.0434369	0.0176965	0.0141063	NAPRT	8	OID31114	Q6XQN6	Neurology_II
APOE_OID30727_CIS_IVs	APOE	IVW	2	0.0285227	0.0117117	0.0148756	APOE	19	OID30727	P02649	Inflammation_II
GPNMB_OID20173_CIS_IVs	GPNMB	Wald ratio	1	0.0552813	0.0227808	0.0152382	GPNMB	7	OID20173	Q14956	Cardiometabolic
BPIFB2_OID30311_CIS_IVs	BPIFB2	Wald ratio	1	-0.0529145	0.0221053	0.0166771	BPIFB2	20	OID30311	Q8N4F0	Cardiometabolic_II
CCN2_OID20709_CIS_IVs	CCN2	Wald ratio	1	-0.0542702	0.0227389	0.0170019	CCN2	6	OID20709	P29279	Inflammation
CCL28_OID20569_CIS_IVs	CCL28	Wald ratio	1	0.0330711	0.0138945	0.0173049	CCL28	5	OID20569	Q9NRJ3	Inflammation
GLRX_OID20195_CIS_IVs	GLRX	Wald ratio	1	0.034192	0.0144944	0.0183255	GLRX	5	OID20195	P35754	Cardiometabolic
CD300C_OID21010_CIS_IVs	CD300C	Wald ratio	1	0.0423087	0.0179596	0.0184844	CD300C	17	OID21010	Q08708	Neurology
TGFBI_OID20417_CIS_IVs	TGFBI	Wald ratio	1	-0.0292217	0.0124092	0.0185307	TGFBI	5	OID20417	Q15582	Cardiometabolic
PRSS53_OID31093_CIS_IVs	PRSS53	Wald ratio	1	-0.0268454	0.0114049	0.0185803	PRSS53	16	OID31093	Q2L4Q9	Neurology_II
TNFSF12_OID20624_CIS_IVs	TNFSF12	Wald ratio	1	0.0503789	0.0215006	0.0191223	TNFSF12	17	OID20624	O43508	Inflammation
EGFLAM_OID31496_CIS_IVs	EGFLAM	IVW	2	-0.0234872	0.0100347	0.0192527	EGFLAM	5	OID31496	Q63HQ2	Oncology_II
NUP50_OID30100_CIS_IVs	NUP50	Wald ratio	1	0.0530858	0.0227881	0.0198302	NUP50	22	OID30100	Q9UKX7	Cardiometabolic_II
TNFRSF19_OID21446_CIS_IVs	TNFRSF19	Wald ratio	1	-0.0476285	0.0204558	0.0198931	TNFRSF19	13	OID21446	Q9NS68	Oncology
AMY1A_AMY1B_AMY1C_OID30707_CIS_IVs	AMY1C	Wald ratio	1	0.0507321	0.0220108	0.0211734	AMY1A_AMY1B_AMY1C	1	OID30707	P0DUB6_P0DTE7_P0DTE8	Inflammation_II
LILRB2_OID20301_CIS_IVs	LILRB2	IVW	2	-0.0228183	0.00993338	0.0216112	LILRB2	19	OID20301	Q8N423	Cardiometabolic
PEPD_OID30688_CIS_IVs	PEPD	Wald ratio	1	0.0393311	0.017195	0.022175	PEPD	19	OID30688	P12955	Inflammation_II
FES_OID21207_CIS_IVs	FES	Wald ratio	1	-0.0448853	0.0197941	0.0233533	FES	15	OID21207	P07332	Oncology
ACP1_OID30524_CIS_IVs	ACP1	Wald ratio	1	-0.0392082	0.0173369	0.0237259	ACP1	2	OID30524	P24666	Inflammation_II
CD101_OID31480_CIS_IVs	CD101	Wald ratio	1	0.0489077	0.021675	0.0240449	CD101	1	OID31480	Q93033	Oncology_II
DTX3_OID21349_CIS_IVs	DTX3	Wald ratio	1	-0.0607387	0.0270763	0.0248811	DTX3	12	OID21349	Q8N9I9	Oncology
MEP1B_OID20168_CIS_IVs	MEP1B	Wald ratio	1	0.0534842	0.0238511	0.024934	MEP1B	18	OID20168	Q16820	Cardiometabolic
CDC27_OID21238_CIS_IVs	CDC27	Wald ratio	1	-0.0224839	0.0100428	0.0251685	CDC27	17	OID21238	P30260	Oncology
ERMAP_OID30539_CIS_IVs	ERMAP	Wald ratio	1	-0.0367808	0.0165032	0.0258339	ERMAP	1	OID30539	Q96PL5	Inflammation_II
GHR_OID30574_CIS_IVs	GHR	Wald ratio	1	0.0438814	0.0196904	0.0258424	GHR	5	OID30574	P10912	Inflammation_II
FGL1_OID30702_CIS_IVs	FGL1	Wald ratio	1	-0.0207155	0.00930082	0.0259291	FGL1	8	OID30702	Q08830	Inflammation_II
POLR2A_OID30440_CIS_IVs	POLR2A	Wald ratio	1	0.0193669	0.00870624	0.0261155	POLR2A	17	OID30440	P24928	Inflammation_II
IL1RL2_OID20487_CIS_IVs	IL1RL2	Wald ratio	1	-0.0320755	0.0144566	0.0265037	IL1RL2	2	OID20487	Q9HB29	Inflammation
TNFRSF10B_OID20981_CIS_IVs	TNFRSF10B	Wald ratio	1	-0.0387258	0.0175716	0.0275325	TNFRSF10B	8	OID20981	O14763	Neurology
GZMH_OID20096_CIS_IVs	GZMH	Wald ratio	1	0.0512963	0.0233165	0.0278069	GZMH	14	OID20096	P20718	Cardiometabolic
MFAP5_OID20239_CIS_IVs	MFAP5	Wald ratio	1	0.0638637	0.029204	0.0287562	MFAP5	12	OID20239	Q13361	Cardiometabolic
LMOD1_OID30212_CIS_IVs	LMOD1	Wald ratio	1	0.0589429	0.0269879	0.0289586	LMOD1	1	OID30212	P29536	Cardiometabolic_II
LMOD1_OID30547_CIS_IVs	LMOD1	Wald ratio	1	0.0589429	0.0269879	0.0289586	LMOD1	1	OID30547	P29536	Inflammation_II
LMOD1_OID31014_CIS_IVs	LMOD1	Wald ratio	1	0.0589429	0.0269879	0.0289586	LMOD1	1	OID31014	P29536	Neurology_II
LMOD1_OID31416_CIS_IVs	LMOD1	Wald ratio	1	0.0589429	0.0269879	0.0289586	LMOD1	1	OID31416	P29536	Oncology_II
FGF2_OID20503_CIS_IVs	FGF2	Wald ratio	1	-0.0270078	0.0123998	0.0293999	FGF2	4	OID20503	P09038	Inflammation
SUSD2_OID21098_CIS_IVs	SUSD2	Wald ratio	1	0.0308289	0.0141592	0.0294578	SUSD2	22	OID21098	Q9UGT4	Neurology
SPON1_OID20759_CIS_IVs	SPON1	Wald ratio	1	-0.0385003	0.0176893	0.0295201	SPON1	11	OID20759	Q9HCB6	Inflammation
TRIM21_OID20533_CIS_IVs	TRIM21	Wald ratio	1	-0.0211384	0.00979585	0.030936	TRIM21	11	OID20533	P19474	Inflammation
RGS10_OID30999_CIS_IVs	RGS10	Wald ratio	1	-0.0387299	0.018074	0.0321246	RGS10	10	OID30999	O43665	Neurology_II
OSCAR_OID20776_CIS_IVs	OSCAR	IVW	2	-0.027006	0.0127486	0.0341458	OSCAR	19	OID20776	Q8IYS5	Inflammation
NPR1_OID30116_CIS_IVs	NPR1	Wald ratio	1	0.0200086	0.00944611	0.0341597	NPR1	1	OID30116	P16066	Cardiometabolic_II
PGLYRP4_OID30101_CIS_IVs	PGLYRP4	Wald ratio	1	0.0225413	0.0106418	0.0341597	PGLYRP4	1	OID30101	Q96LB8	Cardiometabolic_II
FCAR_OID20564_CIS_IVs	FCAR	Wald ratio	1	0.0273838	0.0129713	0.0347628	FCAR	19	OID20564	P24071	Inflammation
ITGB6_OID20493_CIS_IVs	ITGB6	Wald ratio	1	-0.0523941	0.0249496	0.0357288	ITGB6	2	OID20493	P18564	Inflammation
CD300E_OID21418_CIS_IVs	CD300E	Wald ratio	1	-0.0315845	0.0151154	0.036658	CD300E	17	OID21418	Q496F6	Oncology
PBLD_OID20839_CIS_IVs	PBLD	IVW	2	-0.0136143	0.00651975	0.036783	PBLD	10	OID20839	P30039	Neurology
ANKRA2_OID31173_CIS_IVs	ANKRA2	Wald ratio	1	0.0198881	0.00959141	0.038123	ANKRA2	5	OID31173	Q9H9E1	Oncology_II
CD63_OID20988_CIS_IVs	CD63	Wald ratio	1	-0.048923	0.0237155	0.0391208	CD63	12	OID20988	P08962	Neurology
SH3GL3_OID31334_CIS_IVs	SH3GL3	Wald ratio	1	0.0696183	0.033805	0.0394554	SH3GL3	15	OID31334	Q99963	Oncology_II
CA6_OID21096_CIS_IVs	CA6	Wald ratio	1	-0.0381415	0.0185622	0.0398989	CA6	1	OID21096	P23280	Neurology
CEBPA_OID30458_CIS_IVs	CEBPA	Wald ratio	1	0.0247946	0.0121218	0.0408101	CEBPA	19	OID30458	P49715	Inflammation_II
GPIHBP1_OID31469_CIS_IVs	GPIHBP1	Wald ratio	1	-0.0350666	0.0172636	0.0422296	GPIHBP1	8	OID31469	Q8IV16	Oncology_II
HEPACAM2_OID31151_CIS_IVs	HEPACAM2	Wald ratio	1	-0.0384144	0.0189641	0.0428016	HEPACAM2	7	OID31151	A8MVW5	Neurology_II
CLEC12A_OID30552_CIS_IVs	CLEC12A	IVW	2	-0.0226121	0.0112107	0.0436941	CLEC12A	12	OID30552	Q5QGZ9	Inflammation_II
TNFSF13B_OID20272_CIS_IVs	TNFSF13B	Wald ratio	1	-0.0381228	0.0189352	0.0440796	TNFSF13B	13	OID20272	Q9Y275	Cardiometabolic
CCL5_OID20412_CIS_IVs	CCL5	Wald ratio	1	-0.0392868	0.0195395	0.0443637	CCL5	17	OID20412	P13501	Cardiometabolic
TOP2B_OID30559_CIS_IVs	TOP2B	Wald ratio	1	-0.0519985	0.0259993	0.0455003	TOP2B	3	OID30559	Q02880	Inflammation_II
KLK1_OID21499_CIS_IVs	KLK1	Wald ratio	1	-0.0480921	0.0242296	0.0471613	KLK1	19	OID21499	P06870	Oncology
IZUMO1_OID31159_CIS_IVs	IZUMO1	Wald ratio	1	0.0324796	0.0163657	0.0471873	IZUMO1	19	OID31159	Q8IYV9	Oncology_II
SPARC_OID21511_CIS_IVs	SPARC	Wald ratio	1	-0.0287704	0.014535	0.0477731	SPARC	5	OID21511	P09486	Oncology
C1QTNF9_OID30620_CIS_IVs	C1QTNF9	Wald ratio	1	0.0233436	0.0118696	0.0492217	C1QTNF9	13	OID30620	P0C862	Inflammation_II
CNST_OID20127_CIS_IVs	CNST	Wald ratio	1	0.0270971	0.0138486	0.0503867	CNST	1	OID20127	Q6PJW8	Cardiometabolic
LBR_OID21034_CIS_IVs	LBR	Wald ratio	1	-0.0484303	0.0247821	0.0506719	LBR	1	OID21034	Q14739	Neurology
FNDC1_OID31127_CIS_IVs	FNDC1	IVW	2	-0.0295562	0.0151609	0.0512352	FNDC1	6	OID31127	Q4ZHG4	Neurology_II
SERPINA6_OID30743_CIS_IVs	SERPINA6	Wald ratio	1	0.0412727	0.021302	0.0526843	SERPINA6	14	OID30743	P08185	Inflammation_II
CD226_OID30556_CIS_IVs	CD226	Wald ratio	1	0.0325716	0.0168287	0.0529309	CD226	18	OID30556	Q15762	Inflammation_II
PLTP_OID20238_CIS_IVs	PLTP	Wald ratio	1	0.0274179	0.0141817	0.0531951	PLTP	20	OID20238	P55058	Cardiometabolic
F7_OID20372_CIS_IVs	F7	Wald ratio	1	-0.0381076	0.0197295	0.0534204	F7	13	OID20372	P08709	Cardiometabolic
REG3G_OID31408_CIS_IVs	REG3G	Wald ratio	1	0.0392988	0.0203881	0.0539128	REG3G	2	OID31408	Q6UW15	Oncology_II
NFATC3_OID20470_CIS_IVs	NFATC3	Wald ratio	1	-0.0491438	0.0255707	0.0546215	NFATC3	16	OID20470	Q12968	Inflammation
PYDC1_OID30202_CIS_IVs	PYDC1	Wald ratio	1	0.0351756	0.0183996	0.0559064	PYDC1	16	OID30202	Q8WXC3	Cardiometabolic_II
PDP1_OID21176_CIS_IVs	PDP1	Wald ratio	1	0.032693	0.0171472	0.0565705	PDP1	8	OID21176	Q9P0J1	Oncology
IFI30_OID31505_CIS_IVs	IFI30	Wald ratio	1	-0.0533117	0.0280588	0.0574331	IFI30	19	OID31505	P13284	Oncology_II
ATP1B2_OID30118_CIS_IVs	ATP1B2	Wald ratio	1	-0.0309464	0.0163128	0.0578202	ATP1B2	17	OID30118	P14415	Cardiometabolic_II
TREH_OID30388_CIS_IVs	TREH	IVW	2	0.0168556	0.00897281	0.0603098	TREH	11	OID30388	O43280	Cardiometabolic_II
DENR_OID30493_CIS_IVs	DENR	Wald ratio	1	-0.0468501	0.0249418	0.0603294	DENR	12	OID30493	O43583	Inflammation_II
PTPRB_OID30324_CIS_IVs	PTPRB	Wald ratio	1	-0.0278307	0.014819	0.0603745	PTPRB	12	OID30324	P23467	Cardiometabolic_II
PKD1_OID30328_CIS_IVs	PKD1	Wald ratio	1	0.0383901	0.0204747	0.0607927	PKD1	16	OID30328	P98161	Cardiometabolic_II
SCN4B_OID30277_CIS_IVs	SCN4B	Wald ratio	1	-0.0298324	0.0159275	0.0610662	SCN4B	11	OID30277	Q8IWT1	Cardiometabolic_II
S100A11_OID20130_CIS_IVs	S100A11	Wald ratio	1	-0.0198483	0.0106593	0.0625934	S100A11	1	OID20130	P31949	Cardiometabolic
TF_OID30783_CIS_IVs	TF	Wald ratio	1	-0.0424994	0.0228302	0.0626682	TF	3	OID30783	P02787	Inflammation_II
CD164L2_OID30922_CIS_IVs	CD164L2	Wald ratio	1	0.0247122	0.0132969	0.0630994	CD164L2	1	OID30922	Q6UWJ8	Neurology_II
LHPP_OID20749_CIS_IVs	LHPP	IVW	2	-0.0270918	0.0146	0.0635092	LHPP	10	OID20749	Q9H008	Inflammation
SLC9A3R1_OID30630_CIS_IVs	SLC9A3R1	Wald ratio	1	-0.0237985	0.0128265	0.063536	SLC9A3R1	17	OID30630	O14745	Inflammation_II
ADAM15_OID20109_CIS_IVs	ADAM15	Wald ratio	1	-0.0211441	0.0114227	0.0641604	ADAM15	1	OID20109	Q13444	Cardiometabolic
DSG4_OID21325_CIS_IVs	DSG4	Wald ratio	1	-0.0194572	0.0105552	0.0652745	DSG4	18	OID21325	Q86SJ6	Oncology
DAPK2_OID30505_CIS_IVs	DAPK2	Wald ratio	1	0.0482387	0.0261986	0.065582	DAPK2	15	OID30505	Q9UIK4	Inflammation_II
SIGLEC5_OID21082_CIS_IVs	SIGLEC5	Wald ratio	1	-0.0229234	0.0124617	0.0658408	SIGLEC5	19	OID21082	O15389	Neurology
LILRB5_OID20324_CIS_IVs	LILRB5	IVW	3	0.0114171	0.00621755	0.0663168	LILRB5	19	OID20324	O75023	Cardiometabolic
GSTP1_OID20876_CIS_IVs	GSTP1	Wald ratio	1	-0.0326906	0.0178108	0.0664401	GSTP1	11	OID20876	P09211	Neurology
CHRM1_OID30930_CIS_IVs	CHRM1	Wald ratio	1	-0.026997	0.0147343	0.066913	CHRM1	11	OID30930	P11229	Neurology_II
MLN_OID20541_CIS_IVs	MLN	Wald ratio	1	-0.0257021	0.014102	0.0683669	MLN	6	OID20541	P12872	Inflammation
INHBB_OID30625_CIS_IVs	INHBB	Wald ratio	1	-0.0505472	0.027833	0.0693563	INHBB	2	OID30625	P09529	Inflammation_II
HSBP1_OID30232_CIS_IVs	HSBP1	IVW	2	-0.025741	0.0142491	0.0708403	HSBP1	16	OID30232	O75506	Cardiometabolic_II
GSTT2B_OID31097_CIS_IVs	GSTT2B	IVW	3	-0.0147411	0.00817457	0.0713423	GSTT2B	22	OID31097	P0CG30	Neurology_II
IFNGR1_OID20678_CIS_IVs	IFNGR1	IVW	2	-0.0190732	0.0105896	0.0716834	IFNGR1	6	OID20678	P15260	Inflammation
DEFA1_DEFA1B_OID20344_CIS_IVs	DEFA1	Wald ratio	1	0.033824	0.0188527	0.0727944	DEFA1_DEFA1B	8	OID20344	P59665	Cardiometabolic
SLC12A2_OID30077_CIS_IVs	SLC12A2	Wald ratio	1	-0.0414553	0.0231909	0.0738463	SLC12A2	5	OID30077	P55011	Cardiometabolic_II
SNX18_OID31476_CIS_IVs	SNX18	Wald ratio	1	-0.0403223	0.0225703	0.0740156	SNX18	5	OID31476	Q96RF0	Oncology_II
SELL_OID30752_CIS_IVs	SELL	Wald ratio	1	-0.0355224	0.0198925	0.0741455	SELL	1	OID30752	P14151	Inflammation_II
INHBC_OID21093_CIS_IVs	INHBC	Wald ratio	1	-0.0282431	0.0158486	0.0747409	INHBC	12	OID21093	P55103	Neurology
LAIR1_OID20737_CIS_IVs	LAIR1	Wald ratio	1	0.0339573	0.0190834	0.0751723	LAIR1	19	OID20737	Q6GTX8	Inflammation
PTPRH_OID31433_CIS_IVs	PTPRH	Wald ratio	1	0.0215635	0.0121215	0.0752484	PTPRH	19	OID31433	Q9HD43	Oncology_II
EPPK1_OID30250_CIS_IVs	EPPK1	Wald ratio	1	0.0355645	0.020005	0.0754404	EPPK1	8	OID30250	P58107	Cardiometabolic_II
FCGR2B_OID21215_CIS_IVs	FCGR2B	Wald ratio	1	-0.0322835	0.0182472	0.0768554	FCGR2B	1	OID21215	P31994	Oncology
LY6D_OID20708_CIS_IVs	LY6D	Wald ratio	1	-0.028934	0.0163643	0.0770415	LY6D	8	OID20708	Q14210	Inflammation
PRRT3_OID30276_CIS_IVs	PRRT3	Wald ratio	1	-0.0229231	0.0130375	0.0787064	PRRT3	3	OID30276	Q5FWE3	Cardiometabolic_II
VPS37A_OID21355_CIS_IVs	VPS37A	Wald ratio	1	0.0429588	0.0245047	0.0795872	VPS37A	8	OID21355	Q8NEZ2	Oncology
CTSC_OID20679_CIS_IVs	CTSC	Wald ratio	1	-0.0215356	0.0122899	0.0797233	CTSC	11	OID20679	P53634	Inflammation
ADGRE2_OID20755_CIS_IVs	ADGRE2	Wald ratio	1	0.0450776	0.0258106	0.0807278	ADGRE2	19	OID20755	Q9UHX3	Inflammation
CHL1_OID20366_CIS_IVs	CHL1	Wald ratio	1	0.0318823	0.0182821	0.0811761	CHL1	3	OID20366	O00533	Cardiometabolic
TP53INP1_OID20120_CIS_IVs	TP53INP1	Wald ratio	1	-0.0289486	0.0166029	0.0812307	TP53INP1	8	OID20120	Q96A56	Cardiometabolic
GUCA2A_OID21101_CIS_IVs	GUCA2A	Wald ratio	1	-0.0370208	0.0213782	0.0833257	GUCA2A	1	OID21101	Q02747	Neurology
PER3_OID30511_CIS_IVs	PER3	Wald ratio	1	0.0106648	0.00616974	0.0838858	PER3	1	OID30511	P56645	Inflammation_II
MCFD2_OID20171_CIS_IVs	MCFD2	Wald ratio	1	-0.0385697	0.022364	0.0845928	MCFD2	2	OID20171	Q8NI22	Cardiometabolic
SETMAR_OID20948_CIS_IVs	SETMAR	Wald ratio	1	-0.0380687	0.0220754	0.0846195	SETMAR	3	OID20948	Q53H47	Neurology
KLRB1_OID20629_CIS_IVs	KLRB1	Wald ratio	1	0.0536918	0.0311503	0.0847735	KLRB1	12	OID20629	Q12918	Inflammation
GCHFR_OID30631_CIS_IVs	GCHFR	Wald ratio	1	0.0233795	0.0135773	0.0850784	GCHFR	15	OID30631	P30047	Inflammation_II
CR1_OID30697_CIS_IVs	CR1	Wald ratio	1	0.0264018	0.0154639	0.0877631	CR1	1	OID30697	P17927	Inflammation_II
FCN1_OID30690_CIS_IVs	FCN1	Wald ratio	1	-0.0369814	0.0217538	0.0891309	FCN1	9	OID30690	O00602	Inflammation_II
PPCDC_OID21027_CIS_IVs	PPCDC	Wald ratio	1	-0.0270184	0.015908	0.0894299	PPCDC	15	OID21027	Q96CD2	Neurology
ULBP2_OID20919_CIS_IVs	ULBP2	Wald ratio	1	0.0310269	0.0184929	0.0933905	ULBP2	6	OID20919	Q9BZM5	Neurology
KNG1_OID30695_CIS_IVs	KNG1	Wald ratio	1	-0.036217	0.0216625	0.094549	KNG1	3	OID30695	P01042	Inflammation_II
PSAP_OID30419_CIS_IVs	PSAP	Wald ratio	1	-0.0448969	0.0269206	0.0953649	PSAP	10	OID30419	P07602	Cardiometabolic_II
CRELD1_OID30619_CIS_IVs	CRELD1	IVW	2	-0.0177342	0.0107436	0.098804	CRELD1	3	OID30619	Q96HD1	Inflammation_II
CD300LF_OID21469_CIS_IVs	CD300LF	Wald ratio	1	-0.0118885	0.00722457	0.0998524	CD300LF	17	OID21469	Q8TDQ1	Oncology
PRDX6_OID21404_CIS_IVs	PRDX6	Wald ratio	1	0.0379065	0.0230355	0.0998524	PRDX6	1	OID21404	P30041	Oncology
SPRING1_OID31197_CIS_IVs	SPRING1	Wald ratio	1	0.0286818	0.0174698	0.100633	SPRING1	12	OID31197	Q9H741	Oncology_II
GCNT1_OID21379_CIS_IVs	GCNT1	Wald ratio	1	0.0486973	0.02989	0.103268	GCNT1	9	OID21379	Q02742	Oncology
GP6_OID21091_CIS_IVs	GP6	IVW	2	0.0237942	0.0146298	0.103859	GP6	19	OID21091	Q9HCN6	Neurology
MAMDC2_OID30309_CIS_IVs	MAMDC2	Wald ratio	1	-0.0283894	0.0175414	0.105572	MAMDC2	9	OID30309	Q7Z304	Cardiometabolic_II
CEP112_OID30115_CIS_IVs	CEP112	Wald ratio	1	0.0378006	0.0233851	0.106	CEP112	17	OID30115	Q8N8E3	Cardiometabolic_II
SLURP1_OID30404_CIS_IVs	SLURP1	IVW	2	-0.0132476	0.0082252	0.107263	SLURP1	8	OID30404	P55000	Cardiometabolic_II
CXCL1_OID20762_CIS_IVs	CXCL1	Wald ratio	1	0.020631	0.0128521	0.108436	CXCL1	4	OID20762	P09341	Inflammation
RBFOX3_OID30984_CIS_IVs	RBFOX3	Wald ratio	1	0.0471948	0.029426	0.108748	RBFOX3	17	OID30984	A6NFN3	Neurology_II
SUSD1_OID20072_CIS_IVs	SUSD1	Wald ratio	1	0.016699	0.0104162	0.108896	SUSD1	9	OID20072	Q6UWL2	Cardiometabolic
AMIGO1_OID30881_CIS_IVs	AMIGO1	Wald ratio	1	0.0343738	0.0215618	0.110891	AMIGO1	1	OID30881	Q86WK6	Neurology_II
SIGLEC10_OID20537_CIS_IVs	SIGLEC10	Wald ratio	1	-0.0330084	0.0207112	0.110992	SIGLEC10	19	OID20537	Q96LC7	Inflammation
LY9_OID20670_CIS_IVs	LY9	Wald ratio	1	-0.0197344	0.0124881	0.11405	LY9	1	OID20670	Q9HBG7	Inflammation
LILRA3_OID30376_CIS_IVs	LILRA3	IVW	2	-0.0192669	0.0122019	0.114334	LILRA3	19	OID30376	Q8N6C8	Cardiometabolic_II
VAMP8_OID30555_CIS_IVs	VAMP8	Wald ratio	1	-0.036281	0.0229872	0.114494	VAMP8	2	OID30555	Q9BV40	Inflammation_II
CACNA1H_OID30064_CIS_IVs	CACNA1H	Wald ratio	1	-0.0139298	0.00882678	0.114537	CACNA1H	16	OID30064	O95180	Cardiometabolic_II
F11_OID30773_CIS_IVs	F11	Wald ratio	1	-0.0233621	0.0148037	0.114537	F11	4	OID30773	P03951	Inflammation_II
YAP1_OID31113_CIS_IVs	YAP1	Wald ratio	1	-0.0137008	0.0086957	0.115122	YAP1	11	OID31113	P46937	Neurology_II
FKBP5_OID20937_CIS_IVs	FKBP5	Wald ratio	1	-0.0363308	0.0230603	0.115148	FKBP5	6	OID20937	Q13451	Neurology
TBC1D17_OID20844_CIS_IVs	TBC1D17	Wald ratio	1	-0.0307081	0.0196278	0.117696	TBC1D17	19	OID20844	Q9HA65	Neurology
FAS_OID20316_CIS_IVs	FAS	Wald ratio	1	-0.0417608	0.0267697	0.11876	FAS	10	OID20316	P25445	Cardiometabolic
INPP5D_OID30259_CIS_IVs	INPP5D	Wald ratio	1	-0.0222858	0.014292	0.11892	INPP5D	2	OID30259	Q92835	Cardiometabolic_II
ATXN10_OID20865_CIS_IVs	ATXN10	IVW	2	0.0250118	0.0160752	0.119727	ATXN10	22	OID20865	Q9UBB4	Neurology
BCR_OID20558_CIS_IVs	BCR	Wald ratio	1	0.0312046	0.0200601	0.119814	BCR	22	OID20558	P11274	Inflammation
VMO1_OID21381_CIS_IVs	VMO1	Wald ratio	1	-0.0206705	0.0133166	0.120605	VMO1	17	OID21381	Q7Z5L0	Oncology
ACHE_OID30585_CIS_IVs	ACHE	IVW	2	0.0337883	0.0217966	0.121103	ACHE	7	OID30585	P22303	Inflammation_II
GIMAP7_OID30639_CIS_IVs	GIMAP7	Wald ratio	1	0.0213845	0.0138148	0.121635	GIMAP7	7	OID30639	Q8NHV1	Inflammation_II
CD2_OID30097_CIS_IVs	CD2	Wald ratio	1	-0.0351662	0.0227929	0.122865	CD2	1	OID30097	P06729	Cardiometabolic_II
HSDL2_OID30256_CIS_IVs	HSDL2	Wald ratio	1	-0.014925	0.00969356	0.123638	HSDL2	9	OID30256	Q6YN16	Cardiometabolic_II
CBLN4_OID21386_CIS_IVs	CBLN4	Wald ratio	1	-0.0340116	0.0221075	0.123936	CBLN4	20	OID21386	Q9NTU7	Oncology
HBZ_OID30307_CIS_IVs	HBZ	IVW	2	0.0113867	0.00742801	0.125289	HBZ	16	OID30307	P02008	Cardiometabolic_II
WFIKKN2_OID20785_CIS_IVs	WFIKKN2	Wald ratio	1	-0.0187139	0.0122427	0.126371	WFIKKN2	17	OID20785	Q8TEU8	Inflammation
CTHRC1_OID30393_CIS_IVs	CTHRC1	Wald ratio	1	0.0356078	0.0233676	0.127556	CTHRC1	8	OID30393	Q96CG8	Cardiometabolic_II
EFCAB2_OID31313_CIS_IVs	EFCAB2	Wald ratio	1	0.0275732	0.0180949	0.127556	EFCAB2	1	OID31313	Q5VUJ9	Oncology_II
MOG_OID21384_CIS_IVs	MOG	Wald ratio	1	-0.0447482	0.0293703	0.127612	MOG	6	OID21384	Q16653	Oncology
CDH23_OID31074_CIS_IVs	CDH23	IVW	2	-0.0261206	0.0171776	0.128354	CDH23	10	OID31074	Q9H251	Neurology_II
TGOLN2_OID30691_CIS_IVs	TGOLN2	Wald ratio	1	-0.0155098	0.0102298	0.129487	TGOLN2	2	OID30691	O43493	Inflammation_II
LEPR_OID20128_CIS_IVs	LEPR	Wald ratio	1	-0.0352708	0.0232715	0.129614	LEPR	1	OID20128	P48357	Cardiometabolic
CAMSAP1_OID31070_CIS_IVs	CAMSAP1	Wald ratio	1	0.0162011	0.0107613	0.132197	CAMSAP1	9	OID31070	Q5T5Y3	Neurology_II
CES1_OID20244_CIS_IVs	CES1	Wald ratio	1	-0.0770487	0.0512948	0.133078	CES1	16	OID20244	P23141	Cardiometabolic
ICOSLG_OID21351_CIS_IVs	ICOSLG	Wald ratio	1	0.0364389	0.0242926	0.133614	ICOSLG	21	OID21351	O75144	Oncology
NPY_OID21388_CIS_IVs	NPY	Wald ratio	1	0.0428463	0.0285642	0.133614	NPY	7	OID21388	P01303	Oncology
DAPP1_OID20524_CIS_IVs	DAPP1	Wald ratio	1	-0.0196822	0.0131714	0.135092	DAPP1	4	OID20524	Q9UN19	Inflammation
COMMD9_OID31390_CIS_IVs	COMMD9	Wald ratio	1	0.0227707	0.0152417	0.135182	COMMD9	11	OID31390	Q9P000	Oncology_II
KRT18_OID21296_CIS_IVs	KRT18	Wald ratio	1	0.0331053	0.0222426	0.136653	KRT18	12	OID21296	P05783	Oncology
AHNAK_OID30260_CIS_IVs	AHNAK	Wald ratio	1	-0.0331488	0.0222849	0.136883	AHNAK	11	OID30260	Q09666	Cardiometabolic_II
DCLRE1C_OID31240_CIS_IVs	DCLRE1C	Wald ratio	1	0.0241338	0.0162365	0.137175	DCLRE1C	10	OID31240	Q96SD1	Oncology_II
PDZD2_OID30151_CIS_IVs	PDZD2	Wald ratio	1	-0.0145124	0.00977127	0.137489	PDZD2	5	OID30151	O15018	Cardiometabolic_II
NAGK_OID30271_CIS_IVs	NAGK	Wald ratio	1	-0.0366387	0.0247714	0.139122	NAGK	2	OID30271	Q9UJ70	Cardiometabolic_II
AMFR_OID20806_CIS_IVs	AMFR	Wald ratio	1	-0.0231899	0.0156808	0.139174	AMFR	16	OID20806	Q9UKV5	Neurology
KIR3DL1_OID21185_CIS_IVs	KIR3DL1	Wald ratio	1	-0.0292762	0.0198225	0.139696	KIR3DL1	19	OID21185	P43629	Oncology
LILRA6_OID30346_CIS_IVs	LILRA6	Wald ratio	1	-0.0179026	0.012145	0.140462	LILRA6	19	OID30346	Q6PI73	Cardiometabolic_II
TK1_OID31294_CIS_IVs	TK1	Wald ratio	1	0.0234415	0.015916	0.140798	TK1	17	OID31294	P04183	Oncology_II
ENTR1_OID30231_CIS_IVs	ENTR1	Wald ratio	1	-0.031247	0.0212582	0.141594	ENTR1	9	OID30231	Q96C92	Cardiometabolic_II
TNFRSF10A_OID20967_CIS_IVs	TNFRSF10A	Wald ratio	1	-0.0193955	0.0132145	0.142174	TNFRSF10A	8	OID20967	O00220	Neurology
CPB2_OID30734_CIS_IVs	CPB2	Wald ratio	1	-0.0177927	0.0121469	0.142979	CPB2	13	OID30734	Q96IY4	Inflammation_II
CEP20_OID21209_CIS_IVs	CEP20	Wald ratio	1	-0.012824	0.00875788	0.143116	CEP20	16	OID21209	Q96NB1	Oncology
MANEAL_OID31244_CIS_IVs	MANEAL	Wald ratio	1	0.0172724	0.0118102	0.143604	MANEAL	1	OID31244	Q5VSG8	Oncology_II
LCP1_OID30367_CIS_IVs	LCP1	Wald ratio	1	0.0191506	0.013166	0.145795	LCP1	13	OID30367	P13796	Cardiometabolic_II
FGFBP2_OID30395_CIS_IVs	FGFBP2	Wald ratio	1	-0.0198128	0.0136312	0.146088	FGFBP2	4	OID30395	Q9BYJ0	Cardiometabolic_II
TNFRSF11A_OID20646_CIS_IVs	TNFRSF11A	IVW	2	0.0183169	0.0126139	0.146467	TNFRSF11A	18	OID20646	Q9Y6Q6	Inflammation
SEPTIN7_OID31288_CIS_IVs	SEPTIN7	Wald ratio	1	0.0358521	0.0246906	0.146486	SEPTIN7	7	OID31288	Q16181	Oncology_II
RAC3_OID30958_CIS_IVs	RAC3	Wald ratio	1	0.0292048	0.0201336	0.146905	RAC3	17	OID30958	P60763	Neurology_II
LILRB4_OID20429_CIS_IVs	LILRB4	Wald ratio	1	-0.0327298	0.0226047	0.14764	LILRB4	19	OID20429	Q8NHJ6	Inflammation
FRZB_OID20968_CIS_IVs	FRZB	Wald ratio	1	0.0179207	0.0123816	0.147794	FRZB	2	OID20968	Q92765	Neurology
HSPG2_OID20383_CIS_IVs	HSPG2	Wald ratio	1	-0.0438791	0.0304074	0.14901	HSPG2	1	OID20383	P98160	Cardiometabolic
MAG_OID30967_CIS_IVs	MAG	Wald ratio	1	0.00591659	0.00410539	0.149535	MAG	19	OID30967	P20916	Neurology_II
PTN_OID20083_CIS_IVs	PTN	Wald ratio	1	-0.0257892	0.0179167	0.150039	PTN	7	OID20083	P21246	Cardiometabolic
PLXNB2_OID20317_CIS_IVs	PLXNB2	IVW	2	0.0149066	0.0103589	0.150146	PLXNB2	22	OID20317	O15031	Cardiometabolic
VEGFB_OID30554_CIS_IVs	VEGFB	Wald ratio	1	0.0378977	0.0263389	0.150193	VEGFB	11	OID30554	P49765	Inflammation_II
GBA_OID30966_CIS_IVs	GBA	Wald ratio	1	0.0317475	0.0220852	0.150576	GBA	1	OID30966	P04062	Neurology_II
GLO1_OID20107_CIS_IVs	GLO1	Wald ratio	1	0.0262922	0.0182902	0.150576	GLO1	6	OID20107	Q04760	Cardiometabolic
EGFR_OID20319_CIS_IVs	EGFR	Wald ratio	1	0.0346211	0.0241111	0.151032	EGFR	7	OID20319	P00533	Cardiometabolic
SCPEP1_OID30278_CIS_IVs	SCPEP1	Wald ratio	1	0.02871	0.0200475	0.152116	SCPEP1	17	OID30278	Q9HB40	Cardiometabolic_II
TNXB_OID21107_CIS_IVs	TNXB	Wald ratio	1	0.0231661	0.0161926	0.152529	TNXB	6	OID21107	P22105	Neurology
CD48_OID20692_CIS_IVs	CD48	IVW	2	-0.0170472	0.0119415	0.153419	CD48	1	OID20692	P09326	Inflammation
SIGLEC1_OID20690_CIS_IVs	SIGLEC1	Wald ratio	1	0.0345768	0.0242273	0.153527	SIGLEC1	20	OID20690	Q9BZZ2	Inflammation
TRIM58_OID31429_CIS_IVs	TRIM58	Wald ratio	1	-0.0378917	0.026611	0.154472	TRIM58	1	OID31429	Q8NG06	Oncology_II
C5_OID30744_CIS_IVs	C5	Wald ratio	1	0.0190895	0.0134631	0.156217	C5	9	OID30744	P01031	Inflammation_II
MYH4_OID30061_CIS_IVs	MYH4	Wald ratio	1	-0.0330823	0.0233677	0.156854	MYH4	17	OID30061	Q9Y623	Cardiometabolic_II
DOCK9_OID30836_CIS_IVs	DOCK9	Wald ratio	1	0.0318022	0.0225062	0.157643	DOCK9	13	OID30836	Q9BZ29	Neurology_II
HSD17B14_OID31098_CIS_IVs	HSD17B14	IVW	2	-0.0149688	0.0106038	0.158054	HSD17B14	19	OID31098	Q9BPX1	Neurology_II
LYPD8_OID21251_CIS_IVs	LYPD8	Wald ratio	1	-0.0355408	0.0251935	0.158329	LYPD8	1	OID21251	Q6UX82	Oncology
MMP10_OID20687_CIS_IVs	MMP10	Wald ratio	1	-0.0330684	0.0234805	0.159032	MMP10	11	OID20687	P09238	Inflammation
TIMP3_OID20684_CIS_IVs	TIMP3	Wald ratio	1	0.0144528	0.0103234	0.161513	TIMP3	22	OID20684	P35625	Inflammation
CCN3_OID20299_CIS_IVs	CCN3	Wald ratio	1	-0.0296909	0.0212493	0.162335	CCN3	8	OID20299	P48745	Cardiometabolic
AGT_OID30709_CIS_IVs	AGT	Wald ratio	1	-0.0127314	0.00913553	0.163433	AGT	1	OID30709	P01019	Inflammation_II
EIF5A_OID20423_CIS_IVs	EIF5A	Wald ratio	1	-0.0119292	0.00856986	0.163922	EIF5A	17	OID20423	P63241	Inflammation
KLK14_OID21407_CIS_IVs	KLK14	Wald ratio	1	0.0210521	0.0151666	0.165119	KLK14	19	OID21407	Q9P0G3	Oncology
IL7R_OID21136_CIS_IVs	IL7R	Wald ratio	1	-0.0145454	0.0104967	0.165834	IL7R	5	OID21136	P16871	Neurology
DSCAM_OID30993_CIS_IVs	DSCAM	Wald ratio	1	0.0230672	0.0166963	0.167101	DSCAM	21	OID30993	O60469	Neurology_II
RNF43_OID31291_CIS_IVs	RNF43	Wald ratio	1	-0.0253954	0.0184945	0.169711	RNF43	17	OID31291	Q68DV7	Oncology_II
THBS2_OID21104_CIS_IVs	THBS2	IVW	2	0.0300464	0.0218909	0.169891	THBS2	6	OID21104	P35442	Neurology
GALNT3_OID20471_CIS_IVs	GALNT3	Wald ratio	1	-0.020352	0.01484	0.170241	GALNT3	2	OID20471	Q14435	Inflammation
KLRC1_OID30855_CIS_IVs	KLRC1	Wald ratio	1	-0.0359344	0.0263091	0.171985	KLRC1	12	OID30855	P26715	Neurology_II
RET_OID21346_CIS_IVs	RET	Wald ratio	1	-0.016259	0.0119348	0.173097	RET	10	OID21346	P07949	Oncology
CD244_OID20628_CIS_IVs	CD244	Wald ratio	1	0.0340738	0.0250873	0.174397	CD244	1	OID20628	Q9BZW8	Inflammation
SIGLEC6_OID21394_CIS_IVs	SIGLEC6	Wald ratio	1	0.0273847	0.0201904	0.174997	SIGLEC6	19	OID21394	O43699	Oncology
SIRPA_OID20304_CIS_IVs	SIRPA	Wald ratio	1	-0.00953114	0.00702802	0.175047	SIRPA	20	OID20304	P78324	Cardiometabolic
RTN4R_OID21424_CIS_IVs	RTN4R	Wald ratio	1	-0.0236004	0.0174345	0.175845	RTN4R	22	OID21424	Q9BZR6	Oncology
VPS53_OID21281_CIS_IVs	VPS53	Wald ratio	1	0.0114627	0.00847706	0.176311	VPS53	17	OID21281	Q5VIR6	Oncology
CCN5_OID21068_CIS_IVs	CCN5	Wald ratio	1	0.0338297	0.0250199	0.176339	CCN5	20	OID21068	O76076	Neurology
FSHB_OID30233_CIS_IVs	FSHB	Wald ratio	1	-0.0410536	0.030373	0.176488	FSHB	11	OID30233	P01225	Cardiometabolic_II
GAS6_OID20318_CIS_IVs	GAS6	Wald ratio	1	-0.0308078	0.0228677	0.177909	GAS6	13	OID20318	Q14393	Cardiometabolic
MATN3_OID20979_CIS_IVs	MATN3	IVW	2	0.0115704	0.00860361	0.178681	MATN3	2	OID20979	O15232	Neurology
CD33_OID21472_CIS_IVs	CD33	Wald ratio	1	-0.00889474	0.00667106	0.182422	CD33	19	OID21472	P20138	Oncology
IGF2BP3_OID30112_CIS_IVs	IGF2BP3	Wald ratio	1	0.0242656	0.018257	0.18381	IGF2BP3	7	OID30112	O00425	Cardiometabolic_II
PADI4_OID20832_CIS_IVs	PADI4	Wald ratio	1	0.0290538	0.021872	0.18406	PADI4	1	OID20832	Q9UM07	Neurology
CKMT1A_CKMT1B_OID20721_CIS_IVs	CKMT1A	Wald ratio	1	0.0219388	0.016576	0.185659	CKMT1A_CKMT1B	15	OID20721	P12532	Inflammation
SERPINF1_OID30757_CIS_IVs	SERPINF1	Wald ratio	1	0.0326398	0.0246612	0.185659	SERPINF1	17	OID30757	P36955	Inflammation_II
ENTPD5_OID20104_CIS_IVs	ENTPD5	Wald ratio	1	0.0200374	0.0151685	0.186505	ENTPD5	14	OID20104	O75356	Cardiometabolic
MILR1_OID20482_CIS_IVs	MILR1	IVW	2	0.0154732	0.011734	0.187281	MILR1	17	OID20482	Q7Z6M3	Inflammation
PDE5A_OID30584_CIS_IVs	PDE5A	Wald ratio	1	-0.0357561	0.0271927	0.188538	PDE5A	4	OID30584	O76074	Inflammation_II
CFB_OID30755_CIS_IVs	CFB	IVW	2	0.0219097	0.0166804	0.189015	CFB	6	OID30755	P00751	Inflammation_II
AFP_OID20978_CIS_IVs	AFP	Wald ratio	1	-0.029049	0.0221611	0.189922	AFP	4	OID20978	P02771	Neurology
EIF4B_OID21000_CIS_IVs	EIF4B	Wald ratio	1	0.0219081	0.0168132	0.192564	EIF4B	12	OID21000	P23588	Neurology
IL15RA_OID20498_CIS_IVs	IL15RA	IVW	3	0.0269237	0.0206899	0.193158	IL15RA	10	OID20498	Q13261	Inflammation
REG1A_OID20415_CIS_IVs	REG1A	Wald ratio	1	-0.0318151	0.0244908	0.193921	REG1A	2	OID20415	P05451	Cardiometabolic
REG1B_OID20266_CIS_IVs	REG1B	Wald ratio	1	-0.0272505	0.020977	0.193921	REG1B	2	OID20266	P48304	Cardiometabolic
IL18_OID20694_CIS_IVs	IL18	Wald ratio	1	0.0282903	0.0218171	0.194733	IL18	11	OID20694	Q14116	Inflammation
ASGR2_OID30679_CIS_IVs	ASGR2	Wald ratio	1	0.0359648	0.0278326	0.196294	ASGR2	17	OID30679	P07307	Inflammation_II
NID2_OID21085_CIS_IVs	NID2	Wald ratio	1	-0.0177272	0.0137386	0.196939	NID2	14	OID21085	Q14112	Neurology
TRIM24_OID31271_CIS_IVs	TRIM24	Wald ratio	1	0.033797	0.0262866	0.198543	TRIM24	7	OID31271	O15164	Oncology_II
VWF_OID20256_CIS_IVs	VWF	Wald ratio	1	-0.108278	0.0844234	0.199646	VWF	12	OID20256	P04275	Cardiometabolic
MOCS2_OID30638_CIS_IVs	MOCS2	Wald ratio	1	0.0196104	0.0153034	0.20004	MOCS2	5	OID30638	O96007	Inflammation_II
HDDC2_OID31447_CIS_IVs	HDDC2	Wald ratio	1	-0.0222662	0.0173785	0.200106	HDDC2	6	OID31447	Q7Z4H3	Oncology_II
NTproBNP_OID20125_CIS_IVs	NTproBNP	Wald ratio	1	0.0294952	0.0230207	0.200106	NTproBNP	1	OID20125	NTproBNP	Cardiometabolic
PRAP1_OID30391_CIS_IVs	PRAP1	IVW	2	0.0140448	0.0109799	0.200849	PRAP1	10	OID30391	Q96NZ9	Cardiometabolic_II
FCRL6_OID20529_CIS_IVs	FCRL6	Wald ratio	1	0.015676	0.0122615	0.20108	FCRL6	1	OID20529	Q6DN72	Inflammation
CLEC7A_OID20636_CIS_IVs	CLEC7A	Wald ratio	1	0.0180281	0.0141418	0.202377	CLEC7A	12	OID20636	Q9BXN2	Inflammation
HLA-DRA_OID20520_CIS_IVs	HLA-DRA	IVW	2	-0.019071	0.0150299	0.204486	HLA-DRA	6	OID20520	P01903	Inflammation
CEND1_OID30821_CIS_IVs	CEND1	Wald ratio	1	-0.0116153	0.00915561	0.204564	CEND1	11	OID30821	Q8N111	Neurology_II
CD274_OID20966_CIS_IVs	CD274	Wald ratio	1	0.024283	0.0191566	0.204939	CD274	9	OID20966	Q9NZQ7	Neurology
MENT_OID30595_CIS_IVs	MENT	Wald ratio	1	-0.0252545	0.0199377	0.205275	MENT	1	OID30595	Q9BUN1	Inflammation_II
THRAP3_OID30053_CIS_IVs	THRAP3	Wald ratio	1	0.0132434	0.0104553	0.205275	THRAP3	1	OID30053	Q9Y2W1	Cardiometabolic_II
CX3CL1_OID20976_CIS_IVs	CX3CL1	Wald ratio	1	0.0276907	0.0218791	0.205647	CX3CL1	16	OID20976	P78423	Neurology
ITIH1_OID30722_CIS_IVs	ITIH1	Wald ratio	1	0.0227065	0.0179409	0.205647	ITIH1	3	OID30722	P19827	Inflammation_II
KLRD1_OID20632_CIS_IVs	KLRD1	Wald ratio	1	-0.0248046	0.0196256	0.20627	KLRD1	12	OID20632	Q13241	Inflammation
YOD1_OID30181_CIS_IVs	YOD1	Wald ratio	1	0.0195434	0.0154976	0.207287	YOD1	1	OID30181	Q5VVQ6	Cardiometabolic_II
C1R_OID30753_CIS_IVs	C1R	Wald ratio	1	0.0220898	0.017537	0.207808	C1R	12	OID30753	P00736	Inflammation_II
C1S_OID30731_CIS_IVs	C1S	Wald ratio	1	0.017283	0.0137209	0.207808	C1S	12	OID30731	P09871	Inflammation_II
NTRK2_OID20136_CIS_IVs	NTRK2	Wald ratio	1	-0.0194539	0.0154665	0.20846	NTRK2	9	OID20136	Q16620	Cardiometabolic
B3GNT7_OID30281_CIS_IVs	B3GNT7	Wald ratio	1	-0.0177513	0.0141286	0.208967	B3GNT7	2	OID30281	Q8NFL0	Cardiometabolic_II
AAMDC_OID30236_CIS_IVs	AAMDC	Wald ratio	1	0.0142561	0.0113603	0.209514	AAMDC	11	OID30236	Q9H7C9	Cardiometabolic_II
CGREF1_OID20152_CIS_IVs	CGREF1	Wald ratio	1	-0.0127109	0.0101365	0.209854	CGREF1	2	OID20152	Q99674	Cardiometabolic
ERBB2_OID21520_CIS_IVs	ERBB2	Wald ratio	1	0.0135621	0.0108154	0.209854	ERBB2	17	OID21520	P04626	Oncology
KHK_OID30241_CIS_IVs	KHK	Wald ratio	1	0.0255454	0.0203717	0.209854	KHK	2	OID30241	P50053	Cardiometabolic_II
ANPEP_OID20350_CIS_IVs	ANPEP	Wald ratio	1	0.0261777	0.0208798	0.20994	ANPEP	15	OID20350	P15144	Cardiometabolic
MCEMP1_OID30501_CIS_IVs	MCEMP1	Wald ratio	1	-0.0334199	0.026799	0.212376	MCEMP1	19	OID30501	Q8IX19	Inflammation_II
PZP_OID30730_CIS_IVs	PZP	Wald ratio	1	0.0170675	0.0137372	0.21408	PZP	12	OID30730	P20742	Inflammation_II
FAM20A_OID30348_CIS_IVs	FAM20A	Wald ratio	1	-0.0381826	0.0307924	0.214975	FAM20A	17	OID30348	Q96MK3	Cardiometabolic_II
ITIH3_OID20352_CIS_IVs	ITIH3	Wald ratio	1	-0.0247536	0.0199933	0.215681	ITIH3	3	OID20352	Q06033	Cardiometabolic
IL34_OID20809_CIS_IVs	IL34	Wald ratio	1	0.0294409	0.0238799	0.217622	IL34	16	OID20809	Q6ZMJ4	Neurology
VCAN_OID21026_CIS_IVs	VCAN	Wald ratio	1	-0.0106858	0.00871738	0.220272	VCAN	5	OID21026	P13611	Neurology
LGALS3BP_OID30765_CIS_IVs	LGALS3BP	Wald ratio	1	0.0278786	0.0227789	0.220997	LGALS3BP	17	OID30765	Q08380	Inflammation_II
TYMP_OID20234_CIS_IVs	TYMP	Wald ratio	1	0.0262044	0.0214109	0.220997	TYMP	22	OID20234	P19971	Cardiometabolic
DTD1_OID30580_CIS_IVs	DTD1	Wald ratio	1	-0.0176901	0.0144737	0.221624	DTD1	20	OID30580	Q8TEA8	Inflammation_II
CA9_OID21417_CIS_IVs	CA9	Wald ratio	1	0.0327355	0.0267836	0.221624	CA9	9	OID21417	Q16790	Oncology
ASGR1_OID20990_CIS_IVs	ASGR1	Wald ratio	1	-0.026345	0.0215711	0.221968	ASGR1	17	OID20990	P07306	Neurology
HLA-E_OID20532_CIS_IVs	HLA-E	Wald ratio	1	-0.0249209	0.0204407	0.222777	HLA-E	6	OID20532	P13747	Inflammation
CFH_OID30790_CIS_IVs	CFH	Wald ratio	1	0.0260389	0.0213793	0.223243	CFH	1	OID30790	P08603	Inflammation_II
SCGB2A2_OID30104_CIS_IVs	SCGB2A2	Wald ratio	1	0.0328766	0.0271942	0.22668	SCGB2A2	11	OID30104	Q13296	Cardiometabolic_II
CYTH3_OID31208_CIS_IVs	CYTH3	Wald ratio	1	-0.0227634	0.0188584	0.227405	CYTH3	7	OID31208	O43739	Oncology_II
PDGFRB_OID20268_CIS_IVs	PDGFRB	IVW	2	-0.00611773	0.00507769	0.228271	PDGFRB	5	OID20268	P09619	Cardiometabolic
RIPK4_OID30138_CIS_IVs	RIPK4	Wald ratio	1	-0.0200723	0.0167546	0.230909	RIPK4	21	OID30138	P57078	Cardiometabolic_II
GDF15_OID20251_CIS_IVs	GDF15	Wald ratio	1	-0.02233	0.0186425	0.230994	GDF15	19	OID20251	Q99988	Cardiometabolic
VWC2_OID20936_CIS_IVs	VWC2	Wald ratio	1	-0.0166982	0.0139504	0.231318	VWC2	7	OID20936	Q2TAL6	Neurology
NFASC_OID20634_CIS_IVs	NFASC	IVW	2	-0.015869	0.0132817	0.232163	NFASC	1	OID20634	O94856	Inflammation
IL16_OID20633_CIS_IVs	IL16	Wald ratio	1	0.0262664	0.0220916	0.234449	IL16	15	OID20633	Q14005	Inflammation
SPTLC1_OID31086_CIS_IVs	SPTLC1	Wald ratio	1	0.0173263	0.0145941	0.235143	SPTLC1	9	OID31086	O15269	Neurology_II
BTN2A1_OID20713_CIS_IVs	BTN2A1	Wald ratio	1	-0.0331706	0.0281564	0.238764	BTN2A1	6	OID20713	Q7KYR7	Inflammation
MMP3_OID21083_CIS_IVs	MMP3	Wald ratio	1	0.0148157	0.0125832	0.239028	MMP3	11	OID21083	P08254	Neurology
PFKFB2_OID21356_CIS_IVs	PFKFB2	Wald ratio	1	-0.027179	0.0230835	0.239028	PFKFB2	1	OID21356	O60825	Oncology
ITGB7_OID21393_CIS_IVs	ITGB7	Wald ratio	1	-0.0185812	0.015823	0.24027	ITGB7	12	OID21393	P26010	Oncology
CD80_OID30291_CIS_IVs	CD80	Wald ratio	1	-0.0216812	0.0184761	0.240608	CD80	3	OID30291	P33681	Cardiometabolic_II
ADM_OID21467_CIS_IVs	ADM	Wald ratio	1	0.05222	0.0445371	0.240994	ADM	11	OID21467	P35318	Oncology
PAXX_OID30591_CIS_IVs	PAXX	Wald ratio	1	0.0282153	0.0241845	0.243345	PAXX	9	OID30591	Q9BUH6	Inflammation_II
PRTG_OID21443_CIS_IVs	PRTG	Wald ratio	1	-0.0116776	0.0100094	0.243345	PRTG	15	OID21443	Q2VWP7	Oncology
UMOD_OID20237_CIS_IVs	UMOD	Wald ratio	1	0.0118037	0.0101175	0.243345	UMOD	16	OID20237	P07911	Cardiometabolic
ATP1B3_OID30065_CIS_IVs	ATP1B3	Wald ratio	1	0.0288714	0.0247998	0.244351	ATP1B3	3	OID30065	P54709	Cardiometabolic_II
OSMR_OID20356_CIS_IVs	OSMR	Wald ratio	1	-0.014411	0.0124539	0.247214	OSMR	5	OID20356	Q99650	Cardiometabolic
IGFBPL1_OID20155_CIS_IVs	IGFBPL1	IVW	2	0.0136318	0.0117974	0.247889	IGFBPL1	9	OID20155	Q8WX77	Cardiometabolic
CRYGD_OID31144_CIS_IVs	CRYGD	IVW	2	-0.0103206	0.00893197	0.247901	CRYGD	2	OID31144	P07320	Neurology_II
GIPC3_OID31507_CIS_IVs	GIPC3	Wald ratio	1	-0.022682	0.0197019	0.249625	GIPC3	19	OID31507	Q8TF64	Oncology_II
CCL18_OID20395_CIS_IVs	CCL18	Wald ratio	1	0.0107612	0.00936133	0.250336	CCL18	17	OID20395	P55774	Cardiometabolic
ATRAID_OID31451_CIS_IVs	ATRAID	Wald ratio	1	0.0265519	0.0231478	0.251357	ATRAID	2	OID31451	Q6UW56	Oncology_II
TNFSF14_OID20953_CIS_IVs	TNFSF14	Wald ratio	1	-0.0244581	0.0213393	0.251732	TNFSF14	19	OID20953	O43557	Neurology
ARHGEF12_OID20554_CIS_IVs	ARHGEF12	Wald ratio	1	0.030571	0.0267152	0.252487	ARHGEF12	11	OID20554	Q9NZN5	Inflammation
NT5C_OID30294_CIS_IVs	NT5C	Wald ratio	1	-0.0113543	0.00992862	0.252794	NT5C	17	OID30294	Q8TCD5	Cardiometabolic_II
KIAA0319_OID31094_CIS_IVs	KIAA0319	Wald ratio	1	-0.0284402	0.0248852	0.253098	KIAA0319	6	OID31094	Q5VV43	Neurology_II
F13B_OID30781_CIS_IVs	F13B	Wald ratio	1	-0.020724	0.0181602	0.253796	F13B	1	OID30781	P05160	Inflammation_II
DPEP1_OID20897_CIS_IVs	DPEP1	IVW	2	-0.00890525	0.00781081	0.254237	DPEP1	16	OID20897	P16444	Neurology
ANXA11_OID20583_CIS_IVs	ANXA11	Wald ratio	1	-0.0181108	0.0160261	0.258442	ANXA11	10	OID20583	P50995	Inflammation
KIR2DS4_OID31432_CIS_IVs	KIR2DS4	IVW	2	-0.00978272	0.00865944	0.258595	KIR2DS4	19	OID31432	P43632	Oncology_II
SIGLEC8_OID30261_CIS_IVs	SIGLEC8	Wald ratio	1	0.023345	0.0207511	0.260589	SIGLEC8	19	OID30261	Q9NYZ4	Cardiometabolic_II
ESYT2_OID31134_CIS_IVs	ESYT2	Wald ratio	1	-0.0287408	0.0255659	0.260935	ESYT2	7	OID31134	A0FGR8	Neurology_II
LGALS1_OID20154_CIS_IVs	LGALS1	Wald ratio	1	0.0221628	0.019734	0.261405	LGALS1	22	OID20154	P09382	Cardiometabolic
ENPP2_OID20288_CIS_IVs	ENPP2	Wald ratio	1	0.0195171	0.0174353	0.262968	ENPP2	8	OID20288	Q13822	Cardiometabolic
IL17D_OID20481_CIS_IVs	IL17D	Wald ratio	1	-0.0204988	0.0184192	0.26575	IL17D	13	OID20481	Q8TAD2	Inflammation
SPINT3_OID31509_CIS_IVs	SPINT3	Wald ratio	1	0.0153898	0.0138285	0.26575	SPINT3	20	OID31509	P49223	Oncology_II
IL2RA_OID20267_CIS_IVs	IL2RA	Wald ratio	1	-0.0221697	0.0199527	0.266521	IL2RA	10	OID20267	P01589	Cardiometabolic
STK24_OID20837_CIS_IVs	STK24	Wald ratio	1	0.0223354	0.0201018	0.266521	STK24	13	OID20837	Q9Y6E0	Neurology
EFHD1_OID31044_CIS_IVs	EFHD1	Wald ratio	1	0.0206857	0.0187093	0.268885	EFHD1	2	OID31044	Q9BUP0	Neurology_II
SNAP29_OID21506_CIS_IVs	SNAP29	Wald ratio	1	-0.0215364	0.0194795	0.268904	SNAP29	22	OID21506	O95721	Oncology
HGFAC_OID30718_CIS_IVs	HGFAC	Wald ratio	1	-0.0203541	0.0185582	0.27274	HGFAC	4	OID30718	Q04756	Inflammation_II
SPINK4_OID20509_CIS_IVs	SPINK4	Wald ratio	1	0.0115006	0.0104957	0.273191	SPINK4	9	OID20509	O60575	Inflammation
IL1R2_OID20757_CIS_IVs	IL1R2	Wald ratio	1	-0.0148852	0.0135909	0.273412	IL1R2	2	OID20757	P27930	Inflammation
PM20D1_OID20149_CIS_IVs	PM20D1	Wald ratio	1	0.0256783	0.0234454	0.273412	PM20D1	1	OID20149	Q6GTS8	Cardiometabolic
PAFAH2_OID31286_CIS_IVs	PAFAH2	Wald ratio	1	-0.0245995	0.0225495	0.275313	PAFAH2	1	OID31286	Q99487	Oncology_II
S100A16_OID20878_CIS_IVs	S100A16	Wald ratio	1	-0.0168266	0.0154408	0.275826	S100A16	1	OID20878	Q96FQ6	Neurology
NFU1_OID31510_CIS_IVs	NFU1	Wald ratio	1	0.0108504	0.00996465	0.276203	NFU1	2	OID31510	Q9UMS0	Oncology_II
ADAM23_OID20651_CIS_IVs	ADAM23	Wald ratio	1	0.0132802	0.0122473	0.278215	ADAM23	2	OID20651	O75077	Inflammation
CD40_OID20724_CIS_IVs	CD40	Wald ratio	1	0.0119634	0.0110431	0.27866	CD40	20	OID20724	P25942	Inflammation
DLL1_OID21525_CIS_IVs	DLL1	Wald ratio	1	-0.0225716	0.020884	0.279782	DLL1	6	OID21525	O00548	Oncology
PI16_OID30676_CIS_IVs	PI16	Wald ratio	1	0.0372257	0.0344549	0.279955	PI16	6	OID30676	Q6UXB8	Inflammation_II
LILRA2_OID21152_CIS_IVs	LILRA2	Wald ratio	1	-0.013606	0.0126536	0.282254	LILRA2	19	OID21152	Q8N149	Neurology
BRSK2_OID31042_CIS_IVs	BRSK2	Wald ratio	1	0.0210731	0.0198479	0.288359	BRSK2	11	OID31042	Q8IWQ3	Neurology_II
CHIT1_OID20312_CIS_IVs	CHIT1	Wald ratio	1	-0.00903809	0.00851866	0.288701	CHIT1	1	OID20312	Q13231	Cardiometabolic
LAMB1_OID30280_CIS_IVs	LAMB1	Wald ratio	1	-0.0146635	0.0138373	0.28928	LAMB1	7	OID30280	P07942	Cardiometabolic_II
LY75_OID20580_CIS_IVs	LY75	IVW	2	-0.00805166	0.00760113	0.289476	LY75	2	OID20580	O60449	Inflammation
VSIG10_OID31400_CIS_IVs	VSIG10	Wald ratio	1	-0.0172198	0.0163135	0.291171	VSIG10	12	OID31400	Q8N0Z9	Oncology_II
GP1BA_OID20381_CIS_IVs	GP1BA	Wald ratio	1	-0.0203451	0.019315	0.292188	GP1BA	17	OID20381	P07359	Cardiometabolic
DGCR6_OID30859_CIS_IVs	DGCR6	Wald ratio	1	-0.0165632	0.0157553	0.293129	DGCR6	22	OID30859	Q14129	Neurology_II
CSF2RB_OID30553_CIS_IVs	CSF2RB	Wald ratio	1	0.00760754	0.00725643	0.29446	CSF2RB	22	OID30553	P32927	Inflammation_II
TIMP4_OID21147_CIS_IVs	TIMP4	Wald ratio	1	-0.0218822	0.0208761	0.29455	TIMP4	3	OID21147	Q99727	Neurology
SPESP1_OID30298_CIS_IVs	SPESP1	Wald ratio	1	-0.00788057	0.00752237	0.294814	SPESP1	15	OID30298	Q6UW49	Cardiometabolic_II
EXOSC10_OID30083_CIS_IVs	EXOSC10	Wald ratio	1	-0.0321109	0.0307223	0.295932	EXOSC10	1	OID30083	Q01780	Cardiometabolic_II
BCAT1_OID30312_CIS_IVs	BCAT1	Wald ratio	1	-0.0229039	0.0219361	0.296431	BCAT1	12	OID30312	P54687	Cardiometabolic_II
TNFSF10_OID20611_CIS_IVs	TNFSF10	Wald ratio	1	-0.0182575	0.0174887	0.296506	TNFSF10	3	OID20611	P50591	Inflammation
NFKB1_OID30160_CIS_IVs	NFKB1	Wald ratio	1	0.0166761	0.0160264	0.298089	NFKB1	4	OID30160	P19838	Cardiometabolic_II
IL17RA_OID21089_CIS_IVs	IL17RA	Wald ratio	1	-0.0119361	0.0115098	0.299719	IL17RA	22	OID21089	Q96F46	Neurology
ATXN2_OID30850_CIS_IVs	ATXN2	Wald ratio	1	0.0183715	0.0177836	0.301577	ATXN2	12	OID30850	Q99700	Neurology_II
SMOC1_OID21461_CIS_IVs	SMOC1	Wald ratio	1	-0.0294648	0.0285441	0.301951	SMOC1	14	OID21461	Q9H4F8	Oncology
CD27_OID21527_CIS_IVs	CD27	Wald ratio	1	0.0192659	0.0186777	0.302308	CD27	12	OID21527	P26842	Oncology
CAPG_OID21431_CIS_IVs	CAPG	Wald ratio	1	-0.0121587	0.0117957	0.302649	CAPG	2	OID21431	P40121	Oncology
CYB5R2_OID31512_CIS_IVs	CYB5R2	Wald ratio	1	0.0163655	0.015877	0.302649	CYB5R2	11	OID31512	Q6BCY4	Oncology_II
AFAP1_OID30569_CIS_IVs	AFAP1	Wald ratio	1	-0.00721929	0.00701003	0.30308	AFAP1	4	OID30569	Q8N556	Inflammation_II
DHODH_OID30137_CIS_IVs	DHODH	Wald ratio	1	0.00782108	0.00765467	0.306904	DHODH	16	OID30137	Q02127	Cardiometabolic_II
FCRL5_OID21111_CIS_IVs	FCRL5	Wald ratio	1	0.0238285	0.0233566	0.307633	FCRL5	1	OID21111	Q96RD9	Neurology
CCN4_OID21444_CIS_IVs	CCN4	Wald ratio	1	-0.0162658	0.0160076	0.309568	CCN4	8	OID21444	O95388	Oncology
ITPA_OID30082_CIS_IVs	ITPA	Wald ratio	1	-0.0112582	0.0110809	0.309629	ITPA	20	OID30082	Q9BY32	Cardiometabolic_II
OGN_OID21123_CIS_IVs	OGN	Wald ratio	1	-0.0108576	0.0106956	0.310034	OGN	9	OID21123	P20774	Neurology
ASPN_OID30315_CIS_IVs	ASPN	Wald ratio	1	0.0206815	0.0203774	0.310141	ASPN	9	OID30315	Q9BXN1	Cardiometabolic_II
IL12B_OID20666_CIS_IVs	IL12B	Wald ratio	1	0.0127032	0.0125164	0.310141	IL12B	5	OID20666	P29460	Inflammation
RNASE10_OID30238_CIS_IVs	RNASE10	Wald ratio	1	0.00864419	0.00852414	0.310542	RNASE10	14	OID30238	Q5GAN6	Cardiometabolic_II
DSC2_OID21079_CIS_IVs	DSC2	Wald ratio	1	0.0279251	0.0275576	0.310901	DSC2	18	OID21079	Q02487	Neurology
MAD1L1_OID20904_CIS_IVs	MAD1L1	Wald ratio	1	0.0193812	0.0191262	0.310901	MAD1L1	7	OID20904	Q9Y6D9	Neurology
RNASE4_OID30705_CIS_IVs	RNASE4	IVW	2	0.0166946	0.0165258	0.312391	RNASE4	14	OID30705	P34096	Inflammation_II
MEGF10_OID20746_CIS_IVs	MEGF10	Wald ratio	1	0.0192855	0.0192044	0.315273	MEGF10	5	OID20746	Q96KG7	Inflammation
F2_OID30723_CIS_IVs	F2	Wald ratio	1	-0.0230553	0.0230553	0.317311	F2	11	OID30723	P00734	Inflammation_II
IL12A_IL12B_OID21327_CIS_IVs	IL12A	Wald ratio	1	0.011984	0.011984	0.317311	IL12A_IL12B	5	OID21327	P29459_P29460	Oncology
LRP11_OID20185_CIS_IVs	LRP11	Wald ratio	1	0.0123831	0.0123831	0.317311	LRP11	6	OID20185	Q86VZ4	Cardiometabolic
PSME1_OID20969_CIS_IVs	PSME1	Wald ratio	1	0.0255616	0.0255616	0.317311	PSME1	14	OID20969	Q06323	Neurology
IGDCC3_OID30862_CIS_IVs	IGDCC3	Wald ratio	1	-0.0276117	0.0278878	0.322126	IGDCC3	15	OID30862	Q8IVU1	Neurology_II
PNPT1_OID20445_CIS_IVs	PNPT1	Wald ratio	1	-0.0117422	0.0118698	0.322542	PNPT1	2	OID20445	Q8TCS8	Inflammation
RGMA_OID21065_CIS_IVs	RGMA	Wald ratio	1	-0.0259493	0.0263747	0.325179	RGMA	15	OID21065	Q96B86	Neurology
KRT14_OID20800_CIS_IVs	KRT14	Wald ratio	1	-0.015964	0.0162369	0.325512	KRT14	17	OID20800	P02533	Neurology
GP5_OID30611_CIS_IVs	GP5	Wald ratio	1	0.0171328	0.0174974	0.327498	GP5	3	OID30611	P40197	Inflammation_II
S100A13_OID30529_CIS_IVs	S100A13	Wald ratio	1	-0.0128402	0.0131134	0.327498	S100A13	1	OID30529	Q99584	Inflammation_II
CELSR2_OID30593_CIS_IVs	CELSR2	Wald ratio	1	-0.0136916	0.0140719	0.330567	CELSR2	1	OID30593	Q9HCU4	Inflammation_II
CLUL1_OID20198_CIS_IVs	CLUL1	Wald ratio	1	0.0177163	0.0182225	0.33094	CLUL1	18	OID20198	Q15846	Cardiometabolic
VEGFA_OID20650_CIS_IVs	VEGFA	Wald ratio	1	0.0120277	0.0123763	0.331135	VEGFA	6	OID20650	P15692	Inflammation
CLSTN3_OID31092_CIS_IVs	CLSTN3	Wald ratio	1	0.0155986	0.0160786	0.331972	CLSTN3	12	OID31092	Q9BQT9	Neurology_II
HLA-A_OID31048_CIS_IVs	HLA-A	Wald ratio	1	-0.00820551	0.00846193	0.332198	HLA-A	6	OID31048	P04439	Neurology_II
VSIG10L_OID30189_CIS_IVs	VSIG10L	Wald ratio	1	-0.0245852	0.0253535	0.332198	VSIG10L	19	OID30189	Q86VR7	Cardiometabolic_II
NCR3LG1_OID31490_CIS_IVs	NCR3LG1	Wald ratio	1	0.0148198	0.0152979	0.33267	NCR3LG1	11	OID31490	Q68D85	Oncology_II
EDN1_OID30224_CIS_IVs	EDN1	Wald ratio	1	-0.0227439	0.0234896	0.332918	EDN1	6	OID30224	P05305	Cardiometabolic_II
LTA_OID20586_CIS_IVs	LTA	Wald ratio	1	0.00891572	0.00926673	0.335989	LTA	6	OID20586	P01374	Inflammation
IGF2R_OID21146_CIS_IVs	IGF2R	IVW	3	-0.012791	0.0133043	0.336339	IGF2R	6	OID21146	P11717	Neurology
FOLR3_OID21485_CIS_IVs	FOLR3	IVW	3	0.00633634	0.00661322	0.337996	FOLR3	11	OID21485	P41439	Oncology
TIGAR_OID20894_CIS_IVs	TIGAR	IVW	2	0.0124232	0.0129943	0.339046	TIGAR	12	OID20894	Q9NQ88	Neurology
ADIPOQ_OID30748_CIS_IVs	ADIPOQ	IVW	2	-0.0176448	0.0184696	0.339403	ADIPOQ	3	OID30748	Q15848	Inflammation_II
IL1A_OID20488_CIS_IVs	IL1A	Wald ratio	1	0.00804443	0.00843211	0.340072	IL1A	2	OID20488	P01583	Inflammation
SERPINE2_OID30359_CIS_IVs	SERPINE2	Wald ratio	1	0.0205861	0.0215986	0.340527	SERPINE2	2	OID30359	P07093	Cardiometabolic_II
CSTB_OID20294_CIS_IVs	CSTB	Wald ratio	1	-0.0117731	0.0123717	0.341293	CSTB	21	OID20294	P04080	Cardiometabolic
MMP12_OID21439_CIS_IVs	MMP12	Wald ratio	1	0.0172769	0.0181628	0.341493	MMP12	11	OID21439	P39900	Oncology
TNFRSF14_OID20783_CIS_IVs	TNFRSF14	Wald ratio	1	-0.0147218	0.0155528	0.343861	TNFRSF14	1	OID20783	Q92956	Inflammation
CLPS_OID21156_CIS_IVs	CLPS	IVW	2	-0.00816955	0.00865706	0.34533	CLPS	6	OID21156	P04118	Neurology
ISLR2_OID20889_CIS_IVs	ISLR2	Wald ratio	1	0.0200004	0.0213338	0.348501	ISLR2	15	OID20889	Q6UXK2	Neurology
TMSB10_OID21118_CIS_IVs	TMSB10	Wald ratio	1	0.0201214	0.0215023	0.349387	TMSB10	2	OID21118	P63313	Neurology
PSCA_OID31493_CIS_IVs	PSCA	Wald ratio	1	-0.00704893	0.00753506	0.349539	PSCA	8	OID31493	O43653	Oncology_II
BTD_OID30754_CIS_IVs	BTD	Wald ratio	1	-0.0179086	0.0191961	0.350858	BTD	3	OID30754	P43251	Inflammation_II
PCDH9_OID31516_CIS_IVs	PCDH9	Wald ratio	1	-0.0223148	0.0239884	0.352251	PCDH9	13	OID31516	Q9HC56	Oncology_II
CD177_OID21119_CIS_IVs	CD177	IVW	2	0.00917185	0.00987166	0.352833	CD177	19	OID21119	Q8N6Q3	Neurology
C7_OID30766_CIS_IVs	C7	IVW	2	0.00846477	0.00911105	0.352855	C7	5	OID30766	P10643	Inflammation_II
CCL24_OID20772_CIS_IVs	CCL24	IVW	2	0.00802426	0.00863846	0.352941	CCL24	7	OID20772	O00175	Inflammation
COCH_OID30305_CIS_IVs	COCH	IVW	2	-0.0135228	0.0145633	0.353121	COCH	14	OID30305	O43405	Cardiometabolic_II
SAMD9L_OID20536_CIS_IVs	SAMD9L	Wald ratio	1	0.0165926	0.0179057	0.3541	SAMD9L	7	OID20536	Q8IVG5	Inflammation
EGLN1_OID20572_CIS_IVs	EGLN1	Wald ratio	1	-0.0173762	0.018819	0.355834	EGLN1	1	OID20572	Q9GZT9	Inflammation
DCXR_OID21480_CIS_IVs	DCXR	Wald ratio	1	-0.0107863	0.0116851	0.355967	DCXR	17	OID21480	Q7Z4W1	Oncology
CD5L_OID30775_CIS_IVs	CD5L	Wald ratio	1	-0.0221562	0.0240662	0.357241	CD5L	1	OID30775	O43866	Inflammation_II
AGRN_OID20786_CIS_IVs	AGRN	Wald ratio	1	0.0275287	0.0299078	0.357335	AGRN	1	OID20786	O00468	Inflammation
NAAA_OID20931_CIS_IVs	NAAA	Wald ratio	1	-0.0126797	0.0138152	0.358719	NAAA	4	OID20931	Q02083	Neurology
SUSD5_OID30650_CIS_IVs	SUSD5	IVW	2	-0.0110973	0.0120986	0.359018	SUSD5	3	OID30650	O60279	Inflammation_II
MSLN_OID21380_CIS_IVs	MSLN	Wald ratio	1	0.0188171	0.0205733	0.360384	MSLN	16	OID21380	Q13421	Oncology
CD59_OID20339_CIS_IVs	CD59	Wald ratio	1	-0.0279525	0.0305966	0.360937	CD59	11	OID20339	P13987	Cardiometabolic
FUCA1_OID20261_CIS_IVs	FUCA1	Wald ratio	1	-0.0184682	0.0202271	0.36122	FUCA1	1	OID20261	P04066	Cardiometabolic
RBP7_OID31526_CIS_IVs	RBP7	Wald ratio	1	0.00881754	0.00965731	0.36122	RBP7	1	OID31526	Q96R05	Oncology_II
MTHFD2_OID31078_CIS_IVs	MTHFD2	Wald ratio	1	0.0181666	0.0199294	0.362007	MTHFD2	2	OID31078	P13995	Neurology_II
BNIP2_OID30292_CIS_IVs	BNIP2	Wald ratio	1	0.0226517	0.0249168	0.363302	BNIP2	15	OID30292	Q12982	Cardiometabolic_II
COL18A1_OID20332_CIS_IVs	COL18A1	IVW	2	-0.0179115	0.0197308	0.363986	COL18A1	21	OID20332	P39060	Cardiometabolic
PCDH12_OID31045_CIS_IVs	PCDH12	Wald ratio	1	0.0198023	0.0219239	0.366406	PCDH12	5	OID31045	Q9NPG4	Neurology_II
TNFSF8_OID30384_CIS_IVs	TNFSF8	Wald ratio	1	0.0129191	0.0143033	0.366406	TNFSF8	9	OID30384	P32971	Cardiometabolic_II
ADGRD1_OID30588_CIS_IVs	ADGRD1	Wald ratio	1	-0.0189916	0.0210369	0.366644	ADGRD1	12	OID30588	Q6QNK2	Inflammation_II
ACYP1_OID30642_CIS_IVs	ACYP1	IVW	2	0.00832669	0.00924094	0.367553	ACYP1	14	OID30642	P07311	Inflammation_II
CD300LG_OID21130_CIS_IVs	CD300LG	Wald ratio	1	0.0146337	0.0163039	0.36942	CD300LG	17	OID21130	Q6UXG3	Neurology
CD200_OID20603_CIS_IVs	CD200	Wald ratio	1	-0.010787	0.0120261	0.369735	CD200	3	OID20603	P41217	Inflammation
KLK4_OID21391_CIS_IVs	KLK4	Wald ratio	1	0.0214988	0.0239682	0.369735	KLK4	19	OID21391	Q9Y5K2	Oncology
AGXT_OID20139_CIS_IVs	AGXT	Wald ratio	1	-0.019456	0.021745	0.370928	AGXT	2	OID20139	P21549	Cardiometabolic
CPPED1_OID21053_CIS_IVs	CPPED1	Wald ratio	1	-0.0110386	0.0123527	0.371527	CPPED1	16	OID21053	Q9BRF8	Neurology
ARHGEF5_OID30871_CIS_IVs	ARHGEF5	Wald ratio	1	-0.0184527	0.020656	0.371679	ARHGEF5	7	OID30871	Q12774	Neurology_II
LTBP3_OID21191_CIS_IVs	LTBP3	Wald ratio	1	0.0160615	0.0180232	0.372845	LTBP3	11	OID21191	Q9NS15	Oncology
ACP6_OID21432_CIS_IVs	ACP6	IVW	2	-0.006602	0.00742737	0.37407	ACP6	1	OID21432	Q9NPH0	Oncology
NPL_OID30329_CIS_IVs	NPL	Wald ratio	1	0.0177242	0.0199912	0.375295	NPL	1	OID30329	Q9BXD5	Cardiometabolic_II
SNCG_OID20971_CIS_IVs	SNCG	IVW	2	0.00697657	0.00793714	0.379413	SNCG	10	OID20971	O76070	Neurology
REPS1_OID30496_CIS_IVs	REPS1	Wald ratio	1	0.00760381	0.00865474	0.379634	REPS1	6	OID30496	Q96D71	Inflammation_II
LECT2_OID30320_CIS_IVs	LECT2	Wald ratio	1	-0.00722064	0.00823406	0.380528	LECT2	5	OID30320	O14960	Cardiometabolic_II
UGDH_OID30081_CIS_IVs	UGDH	Wald ratio	1	-0.00880923	0.0101002	0.38311	UGDH	4	OID30081	O60701	Cardiometabolic_II
CHGB_OID21038_CIS_IVs	CHGB	Wald ratio	1	-0.0092995	0.0107181	0.385588	CHGB	20	OID21038	P05060	Neurology
RNASET2_OID20321_CIS_IVs	RNASET2	IVW	2	0.01202	0.0138825	0.386582	RNASET2	6	OID20321	O00584	Cardiometabolic
SAA4_OID30726_CIS_IVs	SAA4	Wald ratio	1	0.017827	0.0206418	0.387788	SAA4	11	OID30726	P35542	Inflammation_II
PDCD1LG2_OID21273_CIS_IVs	PDCD1LG2	Wald ratio	1	0.0133543	0.0156568	0.393692	PDCD1LG2	9	OID21273	Q9BQ51	Oncology
AZU1_OID20309_CIS_IVs	AZU1	Wald ratio	1	-0.0093659	0.0109948	0.394296	AZU1	19	OID20309	P20160	Cardiometabolic
CRIM1_OID20701_CIS_IVs	CRIM1	IVW	2	0.0152173	0.0179296	0.396036	CRIM1	2	OID20701	Q9NZV1	Inflammation
SPINT2_OID20720_CIS_IVs	SPINT2	Wald ratio	1	0.0335252	0.0397072	0.398495	SPINT2	19	OID20720	O43291	Inflammation
TMPRSS5_OID20947_CIS_IVs	TMPRSS5	Wald ratio	1	-0.00706606	0.00837458	0.398809	TMPRSS5	11	OID20947	Q9H3S3	Neurology
PALLD_OID30444_CIS_IVs	PALLD	Wald ratio	1	-0.0148018	0.0175615	0.399308	PALLD	4	OID30444	Q8WX93	Inflammation_II
LGALS8_OID21041_CIS_IVs	LGALS8	Wald ratio	1	0.0114454	0.0136161	0.400583	LGALS8	1	OID21041	O00214	Neurology
CSNK1D_OID30492_CIS_IVs	CSNK1D	Wald ratio	1	0.00708195	0.00844013	0.401424	CSNK1D	17	OID30492	P48730	Inflammation_II
MMP15_OID30299_CIS_IVs	MMP15	Wald ratio	1	0.0161295	0.0192359	0.401745	MMP15	16	OID30299	P51511	Cardiometabolic_II
QPCT_OID20320_CIS_IVs	QPCT	Wald ratio	1	-0.0268569	0.0321062	0.402873	QPCT	2	OID20320	Q16769	Cardiometabolic
CMC1_OID30360_CIS_IVs	CMC1	Wald ratio	1	-0.00932375	0.0111519	0.403118	CMC1	3	OID30360	Q7Z7K0	Cardiometabolic_II
LGMN_OID20773_CIS_IVs	LGMN	IVW	2	0.0111355	0.0133227	0.403254	LGMN	14	OID20773	Q99538	Inflammation
NPTXR_OID20191_CIS_IVs	NPTXR	Wald ratio	1	0.00887862	0.0106738	0.405512	NPTXR	22	OID20191	O95502	Cardiometabolic
GID8_OID31041_CIS_IVs	GID8	Wald ratio	1	-0.0177248	0.0213211	0.40579	GID8	20	OID31041	Q9NWU2	Neurology_II
CRHBP_OID20747_CIS_IVs	CRHBP	Wald ratio	1	-0.00933849	0.0112408	0.406104	CRHBP	5	OID20747	P24387	Inflammation
BST1_OID21051_CIS_IVs	BST1	Wald ratio	1	-0.0058843	0.0070934	0.406796	BST1	4	OID21051	Q10588	Neurology
RNASE6_OID30689_CIS_IVs	RNASE6	Wald ratio	1	0.017413	0.021027	0.4076	RNASE6	14	OID30689	Q93091	Inflammation_II
THOP1_OID20194_CIS_IVs	THOP1	IVW	2	-0.00897	0.0108818	0.409761	THOP1	19	OID20194	P52888	Cardiometabolic
TFRC_OID20369_CIS_IVs	TFRC	Wald ratio	1	-0.0132986	0.0161669	0.410747	TFRC	3	OID20369	P02786	Cardiometabolic
CELA3A_OID20298_CIS_IVs	CELA3A	Wald ratio	1	-0.0220317	0.0270066	0.414621	CELA3A	1	OID20298	P09093	Cardiometabolic
SERPINB6_OID21023_CIS_IVs	SERPINB6	Wald ratio	1	0.0231135	0.0283326	0.414621	SERPINB6	6	OID21023	P35237	Neurology
CA13_OID20225_CIS_IVs	CA13	Wald ratio	1	-0.0153967	0.0188828	0.414852	CA13	8	OID20225	Q8N1Q1	Cardiometabolic
ITGAV_OID21416_CIS_IVs	ITGAV	Wald ratio	1	-0.0190028	0.0233053	0.414852	ITGAV	2	OID21416	P06756	Oncology
NT5E_OID21498_CIS_IVs	NT5E	IVW	2	-0.00867895	0.0106599	0.415547	NT5E	6	OID21498	P21589	Oncology
ARSA_OID21138_CIS_IVs	ARSA	Wald ratio	1	0.00929426	0.0114285	0.416073	ARSA	22	OID21138	P15289	Neurology
CTRB1_OID21150_CIS_IVs	CTRB1	Wald ratio	1	-0.010698	0.0131943	0.417474	CTRB1	16	OID21150	P17538	Neurology
CNTNAP2_OID20556_CIS_IVs	CNTNAP2	IVW	2	-0.00863505	0.0106613	0.417972	CNTNAP2	7	OID20556	Q9UHC6	Inflammation
EDNRB_OID30421_CIS_IVs	EDNRB	Wald ratio	1	0.0197794	0.0245264	0.419982	EDNRB	13	OID30421	P24530	Inflammation_II
WIF1_OID21464_CIS_IVs	WIF1	Wald ratio	1	0.018548	0.0229995	0.419982	WIF1	12	OID21464	Q9Y5W5	Oncology
FGFBP3_OID31108_CIS_IVs	FGFBP3	Wald ratio	1	0.0122717	0.0152858	0.422081	FGFBP3	10	OID31108	Q8TAT2	Neurology_II
LCN15_OID31032_CIS_IVs	LCN15	Wald ratio	1	0.0148631	0.0185217	0.422282	LCN15	9	OID31032	Q6UWW0	Neurology_II
IFNGR2_OID20941_CIS_IVs	IFNGR2	Wald ratio	1	0.00718309	0.00902266	0.425964	IFNGR2	21	OID20941	P38484	Neurology
KDR_OID21497_CIS_IVs	KDR	Wald ratio	1	0.0150642	0.0189901	0.427621	KDR	4	OID21497	P35968	Oncology
ATRN_OID30735_CIS_IVs	ATRN	Wald ratio	1	0.0102414	0.0130065	0.431047	ATRN	20	OID30735	O75882-2	Inflammation_II
EIF4G3_OID31022_CIS_IVs	EIF4G3	Wald ratio	1	0.0138017	0.0175397	0.431349	EIF4G3	1	OID31022	O43432	Neurology_II
CLEC4D_OID20609_CIS_IVs	CLEC4D	Wald ratio	1	-0.0111381	0.0141758	0.432035	CLEC4D	12	OID20609	Q8WXI8	Inflammation
ITGA2_OID30570_CIS_IVs	ITGA2	Wald ratio	1	0.0102602	0.0131102	0.433857	ITGA2	5	OID30570	P17301	Inflammation_II
CLEC4G_OID20590_CIS_IVs	CLEC4G	Wald ratio	1	-0.0164355	0.0210159	0.434184	CLEC4G	19	OID20590	Q6UXB4	Inflammation
C7orf50_OID31095_CIS_IVs	C7orf50	Wald ratio	1	-0.014877	0.0190696	0.435307	C7orf50	7	OID31095	Q9BRJ6	Neurology_II
FAM171B_OID31338_CIS_IVs	FAM171B	Wald ratio	1	0.0171587	0.0220246	0.435939	FAM171B	2	OID31338	Q6P995	Oncology_II
EDAR_OID20525_CIS_IVs	EDAR	Wald ratio	1	-0.0118881	0.0153492	0.438629	EDAR	2	OID20525	Q9UNE0	Inflammation
SDK2_OID30662_CIS_IVs	SDK2	Wald ratio	1	0.0118042	0.0152409	0.438629	SDK2	17	OID30662	Q58EX2	Inflammation_II
CLEC1A_OID20099_CIS_IVs	CLEC1A	Wald ratio	1	-0.0139453	0.0180604	0.440024	CLEC1A	12	OID20099	Q8NC01	Cardiometabolic
CLEC1B_OID21061_CIS_IVs	CLEC1B	Wald ratio	1	0.0191675	0.0248467	0.440453	CLEC1B	12	OID21061	Q9P126	Neurology
ENPP7_OID20689_CIS_IVs	ENPP7	Wald ratio	1	0.00641573	0.00834044	0.441756	ENPP7	17	OID20689	Q6UWV6	Inflammation
TCP11_OID31267_CIS_IVs	TCP11	Wald ratio	1	0.017738	0.0231439	0.443424	TCP11	6	OID31267	Q8WWU5	Oncology_II
SPON2_OID20221_CIS_IVs	SPON2	Wald ratio	1	0.0213344	0.0279871	0.445884	SPON2	4	OID20221	Q9BUD6	Cardiometabolic
ICAM5_OID20145_CIS_IVs	ICAM5	Wald ratio	1	-0.0115067	0.0151026	0.446117	ICAM5	19	OID20145	Q9UMF0	Cardiometabolic
IL6R_OID20385_CIS_IVs	IL6R	Wald ratio	1	-0.00460976	0.0060503	0.446117	IL6R	1	OID20385	P08887	Cardiometabolic
PLCB2_OID31155_CIS_IVs	PLCB2	Wald ratio	1	0.0236031	0.0311526	0.448654	PLCB2	15	OID31155	Q00722	Neurology_II
GNLY_OID21132_CIS_IVs	GNLY	Wald ratio	1	0.00731902	0.00967156	0.449196	GNLY	2	OID21132	P22749	Neurology
CTSZ_OID20365_CIS_IVs	CTSZ	Wald ratio	1	-0.0175819	0.0232535	0.449591	CTSZ	20	OID20365	Q9UBR2	Cardiometabolic
TADA3_OID31422_CIS_IVs	TADA3	Wald ratio	1	0.0111518	0.0147643	0.450058	TADA3	3	OID31422	O75528	Oncology_II
TARBP2_OID20870_CIS_IVs	TARBP2	Wald ratio	1	0.0104386	0.0138471	0.450942	TARBP2	12	OID20870	Q15633	Neurology
SMAD3_OID31418_CIS_IVs	SMAD3	Wald ratio	1	-0.010475	0.0139207	0.451765	SMAD3	15	OID31418	P84022	Oncology_II
EPHB6_OID20982_CIS_IVs	EPHB6	IVW	3	-0.0066197	0.00880685	0.452259	EPHB6	7	OID20982	O15197	Neurology
ESPL1_OID31176_CIS_IVs	ESPL1	Wald ratio	1	0.00914214	0.0121895	0.453255	ESPL1	12	OID31176	Q14674	Oncology_II
LAMP1_OID30416_CIS_IVs	LAMP1	Wald ratio	1	-0.0184838	0.0246451	0.453255	LAMP1	13	OID30416	P11279	Cardiometabolic_II
THTPA_OID31375_CIS_IVs	THTPA	Wald ratio	1	-0.0120996	0.0162588	0.456764	THTPA	14	OID31375	Q9BU02	Oncology_II
C9orf40_OID31489_CIS_IVs	C9orf40	Wald ratio	1	0.0149424	0.0201147	0.457568	C9orf40	9	OID31489	Q8IXQ3	Oncology_II
QDPR_OID20174_CIS_IVs	QDPR	Wald ratio	1	-0.0200033	0.0269432	0.45783	QDPR	4	OID20174	P09417	Cardiometabolic
CTSE_OID30628_CIS_IVs	CTSE	Wald ratio	1	-0.0108914	0.0146797	0.458126	CTSE	1	OID30628	P14091	Inflammation_II
ZBP1_OID30526_CIS_IVs	ZBP1	Wald ratio	1	-0.0121315	0.0163511	0.458126	ZBP1	20	OID30526	Q9H171	Inflammation_II
ASAH1_OID30415_CIS_IVs	ASAH1	IVW	2	-0.0272269	0.0368055	0.459451	ASAH1	8	OID30415	Q13510	Cardiometabolic_II
PILRA_OID21129_CIS_IVs	PILRA	IVW	4	0.0142904	0.0193732	0.460733	PILRA	7	OID21129	Q9UKJ1	Neurology
PCSK7_OID31410_CIS_IVs	PCSK7	Wald ratio	1	-0.0174095	0.0236506	0.461663	PCSK7	11	OID31410	Q16549	Oncology_II
GMPR_OID20641_CIS_IVs	GMPR	Wald ratio	1	-0.0139531	0.0190086	0.462923	GMPR	6	OID20641	P36959	Inflammation
PCDHB15_OID31377_CIS_IVs	PCDHB15	Wald ratio	1	0.0113111	0.0154243	0.463355	PCDHB15	5	OID31377	Q9Y5E8	Oncology_II
CSF1R_OID30681_CIS_IVs	CSF1R	Wald ratio	1	0.0129485	0.0177051	0.464569	CSF1R	5	OID30681	P07333	Inflammation_II
FCER2_OID21133_CIS_IVs	FCER2	Wald ratio	1	-0.0197783	0.027065	0.46492	FCER2	19	OID21133	P06734	Neurology
ITGB5_OID21522_CIS_IVs	ITGB5	Wald ratio	1	-0.0149796	0.0204984	0.46492	ITGB5	3	OID21522	P18084	Oncology
SORCS2_OID21262_CIS_IVs	SORCS2	Wald ratio	1	-0.0121241	0.0166048	0.465293	SORCS2	4	OID21262	Q96PQ0	Oncology
APOM_OID20374_CIS_IVs	APOM	Wald ratio	1	-0.0196178	0.0269314	0.466348	APOM	6	OID20374	O95445	Cardiometabolic
ACOX1_OID20124_CIS_IVs	ACOX1	Wald ratio	1	0.0167143	0.0229592	0.466614	ACOX1	17	OID20124	Q15067	Cardiometabolic
SIRPB1_OID20739_CIS_IVs	SIRPB1	Wald ratio	1	-0.00832827	0.0114514	0.467059	SIRPB1	20	OID20739	O00241	Inflammation
CHI3L1_OID20399_CIS_IVs	CHI3L1	Wald ratio	1	0.0179388	0.0248384	0.470158	CHI3L1	1	OID20399	P36222	Cardiometabolic
IL1RL1_OID20250_CIS_IVs	IL1RL1	Wald ratio	1	-0.0102053	0.0141987	0.472295	IL1RL1	2	OID20250	Q01638	Cardiometabolic
LYPD3_OID21530_CIS_IVs	LYPD3	Wald ratio	1	0.0132302	0.0184723	0.473858	LYPD3	19	OID21530	O95274	Oncology
COL4A1_OID20208_CIS_IVs	COL4A1	Wald ratio	1	-0.0161695	0.022593	0.474185	COL4A1	13	OID20208	P02462	Cardiometabolic
KYNU_OID20669_CIS_IVs	KYNU	Wald ratio	1	0.0175345	0.0245033	0.474241	KYNU	2	OID20669	Q16719	Inflammation
IL6ST_OID20147_CIS_IVs	IL6ST	Wald ratio	1	-0.0143222	0.020051	0.475051	IL6ST	5	OID20147	P40189	Cardiometabolic
TNFRSF13C_OID20480_CIS_IVs	TNFRSF13C	Wald ratio	1	-0.0128406	0.0180081	0.475819	TNFRSF13C	22	OID20480	Q96RJ3	Inflammation
VTI1A_OID30640_CIS_IVs	VTI1A	Wald ratio	1	0.0161093	0.0226346	0.476643	VTI1A	10	OID30640	Q96AJ9	Inflammation_II
PPM1F_OID30350_CIS_IVs	PPM1F	Wald ratio	1	-0.0153808	0.0216979	0.478411	PPM1F	22	OID30350	P49593	Cardiometabolic_II
TP53I3_OID30632_CIS_IVs	TP53I3	Wald ratio	1	0.0104613	0.0148202	0.480261	TP53I3	2	OID30632	Q53FA7	Inflammation_II
FKBP14_OID31065_CIS_IVs	FKBP14	Wald ratio	1	-0.0146482	0.0207699	0.480646	FKBP14	7	OID31065	Q9NWM8	Neurology_II
VWA5A_OID31198_CIS_IVs	VWA5A	Wald ratio	1	-0.0143166	0.0203295	0.481292	VWA5A	11	OID31198	O00534	Oncology_II
CCL4_OID20695_CIS_IVs	CCL4	IVW	2	-0.0156852	0.0222905	0.481638	CCL4	17	OID20695	P13236	Inflammation
LRIG1_OID21429_CIS_IVs	LRIG1	IVW	2	-0.0161572	0.0229905	0.482195	LRIG1	3	OID21429	Q96JA1	Oncology
CDCP1_OID20940_CIS_IVs	CDCP1	Wald ratio	1	0.0190529	0.027168	0.483117	CDCP1	3	OID20940	Q9H5V8	Neurology
ZFYVE19_OID31452_CIS_IVs	ZFYVE19	IVW	2	-0.0186783	0.0266375	0.483175	ZFYVE19	15	OID31452	Q96K21	Oncology_II
NUDT16_OID31484_CIS_IVs	NUDT16	Wald ratio	1	0.0191403	0.0274209	0.485165	NUDT16	3	OID31484	Q96DE0	Oncology_II
CRISP2_OID21456_CIS_IVs	CRISP2	Wald ratio	1	0.0122018	0.0175401	0.486647	CRISP2	6	OID21456	P16562	Oncology
GNPDA2_OID30597_CIS_IVs	GNPDA2	Wald ratio	1	-0.0120427	0.0173951	0.488744	GNPDA2	4	OID30597	Q8TDQ7	Inflammation_II
ANXA2_OID30263_CIS_IVs	ANXA2	IVW	2	-0.00944501	0.0137154	0.491049	ANXA2	15	OID30263	P07355	Cardiometabolic_II
UNC79_OID31181_CIS_IVs	UNC79	Wald ratio	1	-0.0150533	0.0219325	0.492494	UNC79	14	OID31181	Q9P2D8	Oncology_II
CPVL_OID21435_CIS_IVs	CPVL	IVW	2	-0.00692469	0.0101027	0.493073	CPVL	7	OID21435	Q9H3G5	Oncology
LGALS9_OID20781_CIS_IVs	LGALS9	Wald ratio	1	-0.00965915	0.0141024	0.493387	LGALS9	17	OID20781	O00182	Inflammation
SPOCK1_OID20924_CIS_IVs	SPOCK1	Wald ratio	1	-0.0173635	0.0253507	0.493387	SPOCK1	5	OID20924	Q08629	Neurology
AXL_OID20363_CIS_IVs	AXL	Wald ratio	1	-0.00902269	0.0131918	0.493999	AXL	19	OID20363	P30530	Cardiometabolic
PTGDS_OID20408_CIS_IVs	PTGDS	Wald ratio	1	-0.01731	0.0253611	0.494898	PTGDS	9	OID20408	P41222	Cardiometabolic
PON2_OID20088_CIS_IVs	PON2	Wald ratio	1	-0.00721303	0.0105987	0.496153	PON2	7	OID20088	Q15165	Cardiometabolic
CCL25_OID20674_CIS_IVs	CCL25	IVW	2	-0.00839327	0.0123953	0.498323	CCL25	19	OID20674	O15444	Inflammation
TREML2_OID21120_CIS_IVs	TREML2	IVW	2	0.0106802	0.0157935	0.49889	TREML2	6	OID21120	Q5T2D2	Neurology
MAP4K5_OID20899_CIS_IVs	MAP4K5	Wald ratio	1	0.00669777	0.00992263	0.499676	MAP4K5	14	OID20899	Q9Y4K4	Neurology
IDUA_OID21468_CIS_IVs	IDUA	Wald ratio	1	0.012483	0.018544	0.500851	IDUA	4	OID21468	P35475	Oncology
TBCA_OID30616_CIS_IVs	TBCA	Wald ratio	1	-0.0144262	0.021479	0.501812	TBCA	5	OID30616	O75347	Inflammation_II
CLEC11A_OID21112_CIS_IVs	CLEC11A	Wald ratio	1	-0.0151783	0.0227026	0.503769	CLEC11A	19	OID21112	Q9Y240	Neurology
PTPN1_OID20908_CIS_IVs	PTPN1	Wald ratio	1	0.0157121	0.0235681	0.504985	PTPN1	20	OID20908	P18031	Neurology
MSRA_OID21513_CIS_IVs	MSRA	Wald ratio	1	-0.014505	0.0218206	0.506217	MSRA	8	OID21513	Q9UJ68	Oncology
TSC22D1_OID31016_CIS_IVs	TSC22D1	Wald ratio	1	0.0160873	0.0243271	0.508426	TSC22D1	13	OID31016	Q15714	Neurology_II
BAG6_OID20114_CIS_IVs	BAG6	Wald ratio	1	-0.010951	0.0165786	0.508901	BAG6	6	OID20114	P46379	Cardiometabolic
DDAH1_OID21299_CIS_IVs	DDAH1	Wald ratio	1	0.0154491	0.0235415	0.511663	DDAH1	1	OID21299	O94760	Oncology
SERPINA9_OID21284_CIS_IVs	SERPINA9	Wald ratio	1	0.0153346	0.0234202	0.512621	SERPINA9	14	OID21284	Q86WD7	Oncology
SSC4D_OID20182_CIS_IVs	SSC4D	Wald ratio	1	-0.00927435	0.0142075	0.5139	SSC4D	7	OID20182	Q8WTU2	Cardiometabolic
BIN2_OID21067_CIS_IVs	BIN2	Wald ratio	1	-0.0314286	0.0482654	0.514941	BIN2	12	OID21067	Q9UBW5	Neurology
SNX15_OID30644_CIS_IVs	SNX15	Wald ratio	1	0.011164	0.0171545	0.51518	SNX15	11	OID30644	Q9NRS6	Inflammation_II
PLEKHO1_OID31088_CIS_IVs	PLEKHO1	Wald ratio	1	-0.00723543	0.0112788	0.521192	PLEKHO1	1	OID31088	Q53GL0	Neurology_II
PTPRF_OID20310_CIS_IVs	PTPRF	Wald ratio	1	-0.0128255	0.0200656	0.522709	PTPRF	1	OID20310	P10586	Cardiometabolic
VSNL1_OID31105_CIS_IVs	VSNL1	Wald ratio	1	-0.011617	0.0182175	0.523681	VSNL1	2	OID31105	P62760	Neurology_II
ATXN3_OID31149_CIS_IVs	ATXN3	IVW	2	-0.0185007	0.02903	0.523931	ATXN3	14	OID31149	P54252	Neurology_II
APCS_OID30778_CIS_IVs	APCS	Wald ratio	1	-0.0197907	0.0310997	0.524539	APCS	1	OID30778	P02743	Inflammation_II
MAVS_OID21204_CIS_IVs	MAVS	Wald ratio	1	-0.0104361	0.016508	0.527267	MAVS	20	OID21204	Q7Z434	Oncology
ADD1_OID30655_CIS_IVs	ADD1	Wald ratio	1	-0.011112	0.0175814	0.527364	ADD1	4	OID30655	P35611	Inflammation_II
CLEC5A_OID20165_CIS_IVs	CLEC5A	Wald ratio	1	-0.00773903	0.0123121	0.52963	CLEC5A	7	OID20165	Q9NY25	Cardiometabolic
ENTPD6_OID20100_CIS_IVs	ENTPD6	Wald ratio	1	-0.00575297	0.00915681	0.529826	ENTPD6	20	OID20100	O75354	Cardiometabolic
PXN_OID20822_CIS_IVs	PXN	Wald ratio	1	-0.0106978	0.0170373	0.530065	PXN	12	OID20822	P49023	Neurology
CRELD2_OID20751_CIS_IVs	CRELD2	Wald ratio	1	0.0134403	0.0214204	0.530364	CRELD2	22	OID20751	Q6UXH1	Inflammation
CNTN3_OID21092_CIS_IVs	CNTN3	Wald ratio	1	-0.0117474	0.0187364	0.53067	CNTN3	3	OID21092	Q9P232	Neurology
SIGLEC7_OID20190_CIS_IVs	SIGLEC7	Wald ratio	1	-0.0166272	0.0265244	0.530747	SIGLEC7	19	OID20190	Q9Y286	Cardiometabolic
ZPR1_OID30801_CIS_IVs	ZPR1	Wald ratio	1	-0.0127401	0.0203352	0.530983	ZPR1	11	OID30801	O75312	Neurology_II
IGFBP3_OID20398_CIS_IVs	IGFBP3	Wald ratio	1	-0.00879345	0.0140695	0.531971	IGFBP3	7	OID20398	P17936	Cardiometabolic
DDC_OID20215_CIS_IVs	DDC	Wald ratio	1	-0.011675	0.018823	0.535091	DDC	7	OID20215	P20711	Cardiometabolic
SERPINA11_OID20281_CIS_IVs	SERPINA11	IVW	3	0.00485711	0.00783492	0.535303	SERPINA11	14	OID20281	Q86U17	Cardiometabolic
CFI_OID30772_CIS_IVs	CFI	Wald ratio	1	-0.0170807	0.0275919	0.535885	CFI	4	OID30772	P05156	Inflammation_II
SCARA5_OID21058_CIS_IVs	SCARA5	Wald ratio	1	0.0167258	0.0270799	0.536808	SCARA5	8	OID21058	Q6ZMJ2	Neurology
SPINK8_OID30153_CIS_IVs	SPINK8	Wald ratio	1	0.0136983	0.0221782	0.536808	SPINK8	3	OID30153	P0C7L1	Cardiometabolic_II
APOH_OID21072_CIS_IVs	APOH	Wald ratio	1	-0.00883661	0.0143214	0.537221	APOH	17	OID21072	P02749	Neurology
DLG4_OID31071_CIS_IVs	DLG4	Wald ratio	1	0.00625833	0.0101524	0.537605	DLG4	17	OID31071	P78352	Neurology_II
FCGR3B_OID20387_CIS_IVs	FCGR3B	Wald ratio	1	0.00683247	0.0110838	0.537605	FCGR3B	1	OID20387	O75015	Cardiometabolic
GC_OID30780_CIS_IVs	GC	IVW	2	-0.00330855	0.00536868	0.537717	GC	4	OID30780	P02774	Inflammation_II
CPA4_OID30606_CIS_IVs	CPA4	Wald ratio	1	0.010525	0.0171993	0.540577	CPA4	7	OID30606	Q9UI42	Inflammation_II
EDF1_OID31010_CIS_IVs	EDF1	Wald ratio	1	-0.00811347	0.0132766	0.541126	EDF1	9	OID31010	O60869	Neurology_II
MFGE8_OID21134_CIS_IVs	MFGE8	Wald ratio	1	0.0159659	0.0262551	0.543116	MFGE8	15	OID21134	Q08431	Neurology
HNMT_OID20975_CIS_IVs	HNMT	Wald ratio	1	0.00760513	0.0125117	0.543292	HNMT	2	OID20975	P50135	Neurology
TPSAB1_OID20642_CIS_IVs	TPSAB1	IVW	2	-0.00594295	0.00978356	0.543558	TPSAB1	16	OID20642	Q15661	Inflammation
APOBR_OID30246_CIS_IVs	APOBR	Wald ratio	1	-0.00487161	0.00803815	0.544475	APOBR	16	OID30246	Q0VD83	Cardiometabolic_II
SERPINH1_OID31322_CIS_IVs	SERPINH1	Wald ratio	1	0.00971565	0.0160421	0.544758	SERPINH1	11	OID31322	P50454	Oncology_II
CDSN_OID20667_CIS_IVs	CDSN	IVW	3	-0.00510069	0.00842519	0.544907	CDSN	6	OID20667	Q15517	Inflammation
ANK2_OID30161_CIS_IVs	ANK2	Wald ratio	1	-0.0100155	0.0165434	0.54491	ANK2	4	OID30161	Q01484	Cardiometabolic_II
SIGLEC9_OID21390_CIS_IVs	SIGLEC9	Wald ratio	1	-0.00700194	0.0116085	0.546393	SIGLEC9	19	OID21390	Q9Y336	Oncology
ACP5_OID20314_CIS_IVs	ACP5	Wald ratio	1	0.0123758	0.0205565	0.547147	ACP5	19	OID20314	P13686	Cardiometabolic
IL10_OID20431_CIS_IVs	IL10	Wald ratio	1	0.00810418	0.0134899	0.548	IL10	1	OID20431	P22301	Inflammation
IL24_OID20440_CIS_IVs	IL24	Wald ratio	1	0.00779989	0.0129834	0.548	IL24	1	OID20440	Q13007	Inflammation
AHNAK2_OID30244_CIS_IVs	AHNAK2	Wald ratio	1	-0.0157671	0.0262784	0.548506	AHNAK2	14	OID30244	Q8IVF2	Cardiometabolic_II
KLK8_OID21517_CIS_IVs	KLK8	Wald ratio	1	0.00526968	0.0087828	0.548506	KLK8	19	OID21517	O60259	Oncology
LIPF_OID30266_CIS_IVs	LIPF	Wald ratio	1	-0.0133384	0.0222307	0.548506	LIPF	10	OID30266	P07098	Cardiometabolic_II
MRC1_OID30694_CIS_IVs	MRC1	Wald ratio	1	-0.00668588	0.0111816	0.549881	MRC1	10	OID30694	P22897	Inflammation_II
MERTK_OID20657_CIS_IVs	MERTK	Wald ratio	1	-0.0117923	0.0197521	0.550497	MERTK	2	OID20657	Q12866	Inflammation
LEO1_OID30991_CIS_IVs	LEO1	Wald ratio	1	-0.0034084	0.00572355	0.551506	LEO1	15	OID30991	Q8WVC0	Neurology_II
KLK15_OID31427_CIS_IVs	KLK15	IVW	2	0.00910682	0.0153912	0.554059	KLK15	19	OID31427	Q9H2R5	Oncology_II
ECM1_OID30736_CIS_IVs	ECM1	Wald ratio	1	0.00518695	0.00883183	0.557001	ECM1	1	OID30736	Q16610	Inflammation_II
TARS1_OID31343_CIS_IVs	TARS1	Wald ratio	1	0.0113225	0.0193283	0.558011	TARS1	5	OID31343	P26639	Oncology_II
LRRFIP1_OID31344_CIS_IVs	LRRFIP1	Wald ratio	1	-0.0136845	0.0234158	0.558941	LRRFIP1	2	OID31344	Q32MZ4	Oncology_II
MELTF_OID30347_CIS_IVs	MELTF	IVW	2	-0.00884711	0.0151452	0.559117	MELTF	3	OID30347	P08582	Cardiometabolic_II
IL18R1_OID20652_CIS_IVs	IL18R1	Wald ratio	1	-0.00537949	0.00925773	0.561186	IL18R1	2	OID20652	Q13478	Inflammation
GLIPR1_OID31517_CIS_IVs	GLIPR1	Wald ratio	1	-0.0151433	0.0260801	0.56148	GLIPR1	12	OID31517	P48060	Oncology_II
CST7_OID20704_CIS_IVs	CST7	IVW	2	0.00502108	0.0086535	0.561755	CST7	20	OID20704	O76096	Inflammation
CPM_OID21054_CIS_IVs	CPM	Wald ratio	1	0.0129889	0.022451	0.562897	CPM	12	OID21054	P14384	Neurology
FRMD4B_OID30155_CIS_IVs	FRMD4B	Wald ratio	1	0.0102336	0.017764	0.564556	FRMD4B	3	OID30155	Q9Y2L6	Cardiometabolic_II
YJU2_OID31404_CIS_IVs	YJU2	Wald ratio	1	-0.0070675	0.0122681	0.564556	YJU2	19	OID31404	Q9BW85	Oncology_II
BCHE_OID30717_CIS_IVs	BCHE	Wald ratio	1	-0.0076161	0.0132794	0.566286	BCHE	3	OID30717	P06276	Inflammation_II
RNF31_OID30473_CIS_IVs	RNF31	Wald ratio	1	0.0110916	0.0193392	0.566286	RNF31	14	OID30473	Q96EP0	Inflammation_II
CD6_OID20649_CIS_IVs	CD6	Wald ratio	1	-0.00525877	0.00923839	0.5692	CD6	11	OID20649	P30203	Inflammation
MATN2_OID20767_CIS_IVs	MATN2	Wald ratio	1	0.0098971	0.0173868	0.5692	MATN2	8	OID20767	O00339	Inflammation
ADA2_OID20394_CIS_IVs	ADA2	Wald ratio	1	-0.00522574	0.00919731	0.569912	ADA2	22	OID20394	Q9NZK5	Cardiometabolic
CNTN2_OID21426_CIS_IVs	CNTN2	IVW	2	-0.00483773	0.00852109	0.570214	CNTN2	1	OID21426	Q02246	Oncology
PLIN3_OID20143_CIS_IVs	PLIN3	Wald ratio	1	0.0157671	0.0277802	0.570329	PLIN3	19	OID20143	O60664	Cardiometabolic
PAM_OID20291_CIS_IVs	PAM	IVW	2	0.00691494	0.0122259	0.571668	PAM	5	OID20291	P19021	Cardiometabolic
CNTN1_OID20307_CIS_IVs	CNTN1	IVW	2	-0.00823836	0.0146388	0.573588	CNTN1	12	OID20307	Q12860	Cardiometabolic
GGH_OID20416_CIS_IVs	GGH	Wald ratio	1	-0.012163	0.021643	0.574127	GGH	8	OID20416	Q92820	Cardiometabolic
AKR7L_OID30488_CIS_IVs	AKR7L	Wald ratio	1	-0.0135968	0.0243174	0.576066	AKR7L	1	OID30488	Q8NHP1	Inflammation_II
CLEC6A_OID21228_CIS_IVs	CLEC6A	Wald ratio	1	0.00930906	0.016714	0.577553	CLEC6A	12	OID21228	Q6EIG7	Oncology
IGHMBP2_OID30123_CIS_IVs	IGHMBP2	Wald ratio	1	0.0136313	0.0245363	0.578515	IGHMBP2	11	OID30123	P38935	Cardiometabolic_II
TNF_OID20074_CIS_IVs	TNF	Wald ratio	1	0.0121326	0.0218386	0.578515	TNF	6	OID20074	P01375	Cardiometabolic
TNF_OID20473_CIS_IVs	TNF	Wald ratio	1	0.0121326	0.0218386	0.578515	TNF	6	OID20473	P01375	Inflammation
TNF_OID20848_CIS_IVs	TNF	Wald ratio	1	0.0121326	0.0218386	0.578515	TNF	6	OID20848	P01375	Neurology
TNF_OID21237_CIS_IVs	TNF	Wald ratio	1	0.0121326	0.0218386	0.578515	TNF	6	OID21237	P01375	Oncology
TNNI3_OID20050_CIS_IVs	TNNI3	Wald ratio	1	-0.00900582	0.0162871	0.580304	TNNI3	19	OID20050	P19429	Cardiometabolic
KIR2DL3_OID21196_CIS_IVs	KIR2DL3	Wald ratio	1	-0.017586	0.031833	0.580642	KIR2DL3	19	OID21196	P43628	Oncology
GPI_OID30680_CIS_IVs	GPI	Wald ratio	1	0.0127142	0.0230193	0.580725	GPI	19	OID30680	P06744	Inflammation_II
ATP5IF1_OID20760_CIS_IVs	ATP5IF1	Wald ratio	1	-0.0126736	0.0229495	0.580785	ATP5IF1	1	OID20760	Q9UII2	Inflammation
MMP8_OID21019_CIS_IVs	MMP8	Wald ratio	1	-0.0123362	0.0224478	0.582628	MMP8	11	OID21019	P22894	Neurology
CDK5RAP3_OID30985_CIS_IVs	CDK5RAP3	Wald ratio	1	0.00844983	0.015383	0.582802	CDK5RAP3	17	OID30985	Q96JB5	Neurology_II
HPGDS_OID21266_CIS_IVs	HPGDS	Wald ratio	1	0.0135883	0.0248615	0.584682	HPGDS	4	OID21266	O60760	Oncology
HIF1A_OID30425_CIS_IVs	HIF1A	Wald ratio	1	-0.0129629	0.0237654	0.585441	HIF1A	14	OID30425	Q16665	Inflammation_II
CES2_OID21366_CIS_IVs	CES2	Wald ratio	1	-0.00646606	0.0118836	0.586361	CES2	16	OID21366	O00748	Oncology
IL31RA_OID30475_CIS_IVs	IL31RA	Wald ratio	1	0.0081089	0.0149703	0.588048	IL31RA	5	OID30475	Q8NI17	Inflammation_II
SMPD1_OID21028_CIS_IVs	SMPD1	Wald ratio	1	-0.0137901	0.0255522	0.589416	SMPD1	11	OID21028	P17405	Neurology
PGLYRP2_OID30742_CIS_IVs	PGLYRP2	Wald ratio	1	-0.00447409	0.00835164	0.592156	PGLYRP2	19	OID30742	Q96PD5	Inflammation_II
CASQ2_OID30063_CIS_IVs	CASQ2	Wald ratio	1	0.00700075	0.0131078	0.593279	CASQ2	1	OID30063	O14958	Cardiometabolic_II
C1QTNF1_OID20367_CIS_IVs	C1QTNF1	Wald ratio	1	-0.0114904	0.0216403	0.595437	C1QTNF1	17	OID20367	Q9BXJ1	Cardiometabolic
INSL5_OID31448_CIS_IVs	INSL5	Wald ratio	1	-0.00654257	0.0123218	0.595437	INSL5	1	OID31448	Q9Y5Q6	Oncology_II
F12_OID30739_CIS_IVs	F12	Wald ratio	1	-0.00329979	0.00625223	0.597654	F12	5	OID30739	P00748	Inflammation_II
MANSC4_OID30141_CIS_IVs	MANSC4	Wald ratio	1	0.0056561	0.0107321	0.598175	MANSC4	12	OID30141	A6NHS7	Cardiometabolic_II
FGF9_OID31193_CIS_IVs	FGF9	Wald ratio	1	0.0089265	0.0170199	0.599948	FGF9	13	OID31193	P31371	Oncology_II
OBP2B_OID20980_CIS_IVs	OBP2B	Wald ratio	1	-0.0136847	0.0260964	0.600007	OBP2B	9	OID20980	Q9NPH6	Neurology
FXN_OID21442_CIS_IVs	FXN	Wald ratio	1	-0.0143472	0.0273901	0.600411	FXN	9	OID21442	Q16595	Oncology
GALNT10_OID21371_CIS_IVs	GALNT10	Wald ratio	1	0.0105322	0.020107	0.600411	GALNT10	5	OID21371	Q86SR1	Oncology
DBH_OID30703_CIS_IVs	DBH	IVW	2	0.00592632	0.0113254	0.60078	DBH	9	OID30703	P09172	Inflammation_II
PIK3IP1_OID21094_CIS_IVs	PIK3IP1	Wald ratio	1	0.00971825	0.0186094	0.601516	PIK3IP1	22	OID21094	Q96FE7	Neurology
CRTAP_OID30902_CIS_IVs	CRTAP	Wald ratio	1	-0.00544976	0.010439	0.601629	CRTAP	3	OID30902	O75718	Neurology_II
CTSB_OID20276_CIS_IVs	CTSB	Wald ratio	1	-0.00933678	0.0179553	0.603064	CTSB	8	OID20276	P07858	Cardiometabolic
ANG_OID20403_CIS_IVs	ANG	Wald ratio	1	0.0072524	0.0139868	0.604097	ANG	14	OID20403	P03950	Cardiometabolic
GALNT2_OID21423_CIS_IVs	GALNT2	Wald ratio	1	0.00890975	0.0172849	0.606229	GALNT2	1	OID21423	Q10471	Oncology
PARK7_OID21160_CIS_IVs	PARK7	IVW	2	-0.00883482	0.0171725	0.606919	PARK7	1	OID21160	Q99497	Neurology
TDGF1_OID20816_CIS_IVs	TDGF1	Wald ratio	1	0.00364446	0.00709192	0.60733	TDGF1	3	OID20816	P13385	Neurology
CRISP3_OID30715_CIS_IVs	CRISP3	IVW	2	0.00481481	0.00947454	0.611324	CRISP3	6	OID30715	P54108	Inflammation_II
SPINK1_OID21097_CIS_IVs	SPINK1	Wald ratio	1	0.0118628	0.0233661	0.611669	SPINK1	5	OID21097	P00995	Neurology
CD14_OID20378_CIS_IVs	CD14	Wald ratio	1	-0.010897	0.0217939	0.617075	CD14	5	OID20378	P08571	Cardiometabolic
CDHR5_OID20193_CIS_IVs	CDHR5	Wald ratio	1	0.00733727	0.0146745	0.617075	CDHR5	11	OID20193	Q9HBB8	Cardiometabolic
RELT_OID21142_CIS_IVs	RELT	Wald ratio	1	0.00933193	0.0186639	0.617075	RELT	11	OID21142	Q969Z4	Neurology
ZNRF4_OID31347_CIS_IVs	ZNRF4	Wald ratio	1	0.0124923	0.0253222	0.621777	ZNRF4	19	OID31347	Q8WWF5	Oncology_II
FKBP7_OID20846_CIS_IVs	FKBP7	Wald ratio	1	-0.0142032	0.0288317	0.622277	FKBP7	2	OID20846	Q9Y680	Neurology
LARP1_OID31372_CIS_IVs	LARP1	Wald ratio	1	-0.0139547	0.0285109	0.624522	LARP1	5	OID31372	Q6PKG0	Oncology_II
F10_OID30684_CIS_IVs	F10	Wald ratio	1	-0.0113561	0.0232529	0.625286	F10	13	OID30684	P00742	Inflammation_II
PMM2_OID30125_CIS_IVs	PMM2	Wald ratio	1	0.00507749	0.0104027	0.625482	PMM2	16	OID30125	O15305	Cardiometabolic_II
NUCB2_OID21448_CIS_IVs	NUCB2	Wald ratio	1	0.00578587	0.011945	0.62812	NUCB2	11	OID21448	P80303	Oncology
FHIT_OID20872_CIS_IVs	FHIT	Wald ratio	1	-0.0112539	0.0236332	0.633939	FHIT	3	OID20872	P49789	Neurology
FUT8_OID20992_CIS_IVs	FUT8	IVW	2	0.00852414	0.0179794	0.635424	FUT8	14	OID20992	Q9BYC5	Neurology
NAP1L4_OID31475_CIS_IVs	NAP1L4	Wald ratio	1	0.00740047	0.015726	0.637935	NAP1L4	11	OID31475	Q99733	Oncology_II
THY1_OID21050_CIS_IVs	THY1	Wald ratio	1	0.00862225	0.018357	0.638572	THY1	11	OID21050	P04216	Neurology
RNASE3_OID20203_CIS_IVs	RNASE3	Wald ratio	1	-0.0101795	0.0217393	0.639603	RNASE3	14	OID20203	P12724	Cardiometabolic
KLK10_OID21523_CIS_IVs	KLK10	IVW	2	-0.00499585	0.0107953	0.643522	KLK10	19	OID21523	O43240	Oncology
PVR_OID21011_CIS_IVs	PVR	Wald ratio	1	-0.00646574	0.01398	0.643723	PVR	19	OID21011	P15151	Neurology
LRRN1_OID20438_CIS_IVs	LRRN1	Wald ratio	1	-0.00434216	0.009408	0.644412	LRRN1	3	OID20438	Q6UXK5	Inflammation
PECR_OID30228_CIS_IVs	PECR	Wald ratio	1	-0.0109813	0.0239961	0.64722	PECR	2	OID30228	Q9BY49	Cardiometabolic_II
FBN2_OID30974_CIS_IVs	FBN2	Wald ratio	1	-0.00944905	0.0207508	0.648852	FBN2	5	OID30974	P35556	Neurology_II
GMPR2_OID30623_CIS_IVs	GMPR2	Wald ratio	1	0.00538933	0.0118565	0.649436	GMPR2	14	OID30623	Q9P2T1	Inflammation_II
NMI_OID31378_CIS_IVs	NMI	Wald ratio	1	0.00531961	0.0117791	0.651548	NMI	2	OID31378	Q13287	Oncology_II
IGLC2_OID30740_CIS_IVs	IGLC2	Wald ratio	1	-0.00194207	0.00430406	0.651831	IGLC2	22	OID30740	P0DOY2	Inflammation_II
ADAMTSL5_OID30355_CIS_IVs	ADAMTSL5	Wald ratio	1	0.0110804	0.0247463	0.654326	ADAMTSL5	19	OID30355	Q6ZMM2	Cardiometabolic_II
NOP56_OID30055_CIS_IVs	NOP56	Wald ratio	1	-0.00931693	0.0208261	0.654609	NOP56	20	OID30055	O00567	Cardiometabolic_II
ENDOU_OID31498_CIS_IVs	ENDOU	Wald ratio	1	0.00970318	0.0219939	0.659085	ENDOU	12	OID31498	P21128	Oncology_II
AK1_OID20122_CIS_IVs	AK1	Wald ratio	1	0.00874818	0.0199264	0.660644	AK1	9	OID20122	P00568	Cardiometabolic
CRYZL1_OID30272_CIS_IVs	CRYZL1	Wald ratio	1	0.00873928	0.020068	0.663211	CRYZL1	21	OID30272	O95825	Cardiometabolic_II
ANGPTL3_OID20407_CIS_IVs	ANGPTL3	IVW	2	-0.00643214	0.0147711	0.663232	ANGPTL3	1	OID20407	Q9Y5C1	Cardiometabolic
SLAMF7_OID20602_CIS_IVs	SLAMF7	Wald ratio	1	0.0106086	0.024432	0.664136	SLAMF7	1	OID20602	Q9NQ25	Inflammation
NPTX2_OID30390_CIS_IVs	NPTX2	Wald ratio	1	0.00893732	0.0207577	0.666792	NPTX2	7	OID30390	P47972	Cardiometabolic_II
TLR3_OID20612_CIS_IVs	TLR3	Wald ratio	1	-0.00642045	0.014912	0.666792	TLR3	4	OID20612	O15455	Inflammation
PILRB_OID20197_CIS_IVs	PILRB	IVW	3	0.0083482	0.019443	0.667655	PILRB	7	OID20197	Q9UKJ0	Cardiometabolic
COL6A3_OID20292_CIS_IVs	COL6A3	Wald ratio	1	-0.00516442	0.0120503	0.668235	COL6A3	2	OID20292	P12111	Cardiometabolic
PROK1_OID20543_CIS_IVs	PROK1	Wald ratio	1	-0.00441717	0.0103067	0.668235	PROK1	1	OID20543	P58294	Inflammation
CPXM1_OID21479_CIS_IVs	CPXM1	Wald ratio	1	0.0105614	0.0248704	0.671086	CPXM1	20	OID21479	Q96SM3	Oncology
CST1_OID30581_CIS_IVs	CST1	Wald ratio	1	-0.00958832	0.022601	0.671389	CST1	20	OID30581	P01037	Inflammation_II
C1QL2_OID30515_CIS_IVs	C1QL2	Wald ratio	1	-0.00875003	0.0207813	0.673717	C1QL2	2	OID30515	Q7Z5L3	Inflammation_II
GPRC5C_OID31340_CIS_IVs	GPRC5C	Wald ratio	1	-0.00981314	0.0233485	0.674274	GPRC5C	17	OID31340	Q9NQ84	Oncology_II
ALDH5A1_OID31047_CIS_IVs	ALDH5A1	Wald ratio	1	0.0113066	0.02699	0.675275	ALDH5A1	6	OID31047	P51649	Neurology_II
EDDM3B_OID31365_CIS_IVs	EDDM3B	Wald ratio	1	-0.00759973	0.0181413	0.675275	EDDM3B	14	OID31365	P56851	Oncology_II
ASS1_OID30170_CIS_IVs	ASS1	Wald ratio	1	-0.00534222	0.012767	0.675626	ASS1	9	OID30170	P00966	Cardiometabolic_II
CD38_OID21316_CIS_IVs	CD38	Wald ratio	1	0.00786109	0.018819	0.676151	CD38	4	OID21316	P28907	Oncology
GPC1_OID21438_CIS_IVs	GPC1	Wald ratio	1	0.00821272	0.0197496	0.677526	GPC1	2	OID21438	P35052	Oncology
DDR1_OID21009_CIS_IVs	DDR1	IVW	2	-0.00970664	0.023369	0.677875	DDR1	6	OID21009	Q08345	Neurology
CUZD1_OID30914_CIS_IVs	CUZD1	Wald ratio	1	-0.00768817	0.018629	0.679828	CUZD1	10	OID30914	Q86UP6	Neurology_II
MSMB_OID20275_CIS_IVs	MSMB	Wald ratio	1	0.00671106	0.0162614	0.679828	MSMB	10	OID20275	P08118	Cardiometabolic
IGSF3_OID21312_CIS_IVs	IGSF3	Wald ratio	1	0.00589697	0.0143212	0.680512	IGSF3	1	OID21312	O75054	Oncology
CPA2_OID21060_CIS_IVs	CPA2	Wald ratio	1	-0.00894121	0.0217569	0.681103	CPA2	7	OID21060	P48052	Neurology
AGBL2_OID30793_CIS_IVs	AGBL2	Wald ratio	1	-0.00793013	0.0193081	0.681282	AGBL2	11	OID30793	Q5U5Z8	Neurology_II
LRP1_OID21293_CIS_IVs	LRP1	Wald ratio	1	-0.00333492	0.00819438	0.684025	LRP1	12	OID21293	Q07954	Oncology
LONP1_OID30219_CIS_IVs	LONP1	Wald ratio	1	-0.0103968	0.025592	0.684559	LONP1	19	OID30219	P36776	Cardiometabolic_II
COMT_OID20086_CIS_IVs	COMT	Wald ratio	1	-0.00456265	0.0113154	0.686782	COMT	22	OID20086	P21964	Cardiometabolic
NAGPA_OID30643_CIS_IVs	NAGPA	Wald ratio	1	-0.00511382	0.012719	0.687639	NAGPA	16	OID30643	Q9UK23	Inflammation_II
KLB_OID20888_CIS_IVs	KLB	Wald ratio	1	-0.00463766	0.0115941	0.689157	KLB	4	OID20888	Q86Z14	Neurology
MICB_MICA_OID20593_CIS_IVs	MICB	IVW	3	-0.00255153	0.00639043	0.689692	MICB_MICA	6	OID20593	Q29980_Q29983	Inflammation
KLK12_OID21201_CIS_IVs	KLK12	IVW	2	0.00283986	0.0071313	0.690464	KLK12	19	OID21201	Q9UKR0	Oncology
IGFBP7_OID20236_CIS_IVs	IGFBP7	Wald ratio	1	-0.00917757	0.023092	0.691046	IGFBP7	4	OID20236	Q16270	Cardiometabolic
GLB1_OID20949_CIS_IVs	GLB1	Wald ratio	1	0.00759896	0.0191381	0.691324	GLB1	3	OID20949	P16278	Neurology
DPP6_OID21354_CIS_IVs	DPP6	IVW	2	-0.00586668	0.014822	0.692246	DPP6	7	OID21354	P42658	Oncology
NCR1_OID20566_CIS_IVs	NCR1	Wald ratio	1	-0.00263052	0.00667253	0.693411	NCR1	19	OID20566	O76036	Inflammation
CXCL5_OID20207_CIS_IVs	CXCL5	Wald ratio	1	-0.00824055	0.0210351	0.695241	CXCL5	4	OID20207	P42830	Cardiometabolic
SPRY2_OID20475_CIS_IVs	SPRY2	Wald ratio	1	-0.00751564	0.0192066	0.695572	SPRY2	13	OID20475	O43597	Inflammation
RRAS_OID30961_CIS_IVs	RRAS	Wald ratio	1	0.00295339	0.00759442	0.697358	RRAS	19	OID30961	P10301	Neurology_II
SCARF1_OID20297_CIS_IVs	SCARF1	IVW	2	0.00418362	0.0107688	0.69765	SCARF1	17	OID20297	Q14162	Cardiometabolic
CILP_OID30399_CIS_IVs	CILP	Wald ratio	1	0.00744335	0.0192976	0.699708	CILP	15	OID30399	O75339	Cardiometabolic_II
AMN_OID20492_CIS_IVs	AMN	Wald ratio	1	-0.00611353	0.0158952	0.700522	AMN	14	OID20492	Q9BXJ7	Inflammation
KLK6_OID21526_CIS_IVs	KLK6	Wald ratio	1	-0.00970508	0.0252332	0.700522	KLK6	19	OID21526	Q92876	Oncology
IL4R_OID20576_CIS_IVs	IL4R	Wald ratio	1	0.00838045	0.0219181	0.7022	IL4R	16	OID20576	P24394	Inflammation
SMPDL3A_OID20676_CIS_IVs	SMPDL3A	Wald ratio	1	-0.00728193	0.0191151	0.703239	SMPDL3A	6	OID20676	Q92484	Inflammation
FLRT2_OID20946_CIS_IVs	FLRT2	Wald ratio	1	-0.00578495	0.0152062	0.703623	FLRT2	14	OID20946	O43155	Neurology
VNN1_OID30711_CIS_IVs	VNN1	Wald ratio	1	-0.00730637	0.01939	0.706314	VNN1	6	OID30711	O95497	Inflammation_II
FGF6_OID30443_CIS_IVs	FGF6	Wald ratio	1	-0.00720796	0.0192212	0.70766	FGF6	12	OID30443	P10767	Inflammation_II
SPRR3_OID31131_CIS_IVs	SPRR3	Wald ratio	1	-0.00728823	0.0194353	0.70766	SPRR3	1	OID31131	Q9UBC9	Neurology_II
TNFRSF11B_OID20735_CIS_IVs	TNFRSF11B	IVW	2	-0.0113679	0.0305794	0.710078	TNFRSF11B	8	OID20735	O00300	Inflammation
CD276_OID20680_CIS_IVs	CD276	Wald ratio	1	-0.00323608	0.00879551	0.71293	CD276	15	OID20680	Q5ZPR3	Inflammation
IGF1R_OID21274_CIS_IVs	IGF1R	Wald ratio	1	0.00845246	0.0229734	0.71293	IGF1R	15	OID21274	P08069	Oncology
FBLN2_OID30378_CIS_IVs	FBLN2	Wald ratio	1	-0.00945591	0.0257201	0.713136	FBLN2	3	OID30378	P98095	Cardiometabolic_II
SUSD4_OID31398_CIS_IVs	SUSD4	Wald ratio	1	-0.0069162	0.0188121	0.713136	SUSD4	1	OID31398	Q5VX71	Oncology_II
MYBPC2_OID30199_CIS_IVs	MYBPC2	Wald ratio	1	-0.00465988	0.0126852	0.71336	MYBPC2	19	OID30199	Q14324	Cardiometabolic_II
MFAP4_OID30598_CIS_IVs	MFAP4	Wald ratio	1	0.00726977	0.0198039	0.713553	MFAP4	17	OID30598	P55083	Inflammation_II
C8B_OID30719_CIS_IVs	C8B	Wald ratio	1	0.00525006	0.0143367	0.714218	C8B	1	OID30719	P07358	Inflammation_II
CFHR5_OID30716_CIS_IVs	CFHR5	Wald ratio	1	-0.00600709	0.0164639	0.715212	CFHR5	1	OID30716	Q9BXR6	Inflammation_II
ARG1_OID21445_CIS_IVs	ARG1	Wald ratio	1	0.00785771	0.0216087	0.71613	ARG1	6	OID21445	P05089	Oncology
CTBS_OID30710_CIS_IVs	CTBS	IVW	2	-0.00494222	0.0137323	0.718924	CTBS	1	OID30710	Q01459	Inflammation_II
TYRO3_OID20161_CIS_IVs	TYRO3	Wald ratio	1	0.00572133	0.015972	0.720187	TYRO3	15	OID20161	Q06418	Cardiometabolic
NRCAM_OID20229_CIS_IVs	NRCAM	Wald ratio	1	-0.00957996	0.0267441	0.720187	NRCAM	7	OID20229	Q92823	Cardiometabolic
AHSG_OID30706_CIS_IVs	AHSG	Wald ratio	1	0.00446651	0.0125062	0.720985	AHSG	3	OID30706	P02765	Inflammation_II
CEMIP2_OID30499_CIS_IVs	CEMIP2	Wald ratio	1	0.00723221	0.0202502	0.720985	CEMIP2	9	OID30499	Q9UHN6	Inflammation_II
CNTN4_OID21117_CIS_IVs	CNTN4	Wald ratio	1	0.00755823	0.0212721	0.722356	CNTN4	3	OID21117	Q8IWV2	Neurology
ACE_OID30696_CIS_IVs	ACE	Wald ratio	1	0.003092	0.00871381	0.72271	ACE	17	OID30696	P12821	Inflammation_II
SRC_OID21521_CIS_IVs	SRC	Wald ratio	1	0.00445198	0.012634	0.724553	SRC	20	OID21521	P12931	Oncology
GDNF_OID20861_CIS_IVs	GDNF	Wald ratio	1	-0.00600756	0.017084	0.725102	GDNF	5	OID20861	P39905	Neurology
PPP3R1_OID20902_CIS_IVs	PPP3R1	Wald ratio	1	-0.00570454	0.016236	0.725325	PPP3R1	2	OID20902	P63098	Neurology
PRTN3_OID20329_CIS_IVs	PRTN3	IVW	2	-0.00469859	0.0134012	0.725882	PRTN3	19	OID20329	P24158	Cardiometabolic
ZCCHC8_OID30117_CIS_IVs	ZCCHC8	Wald ratio	1	0.0037015	0.010611	0.727212	ZCCHC8	12	OID30117	Q6NZY4	Cardiometabolic_II
NT5C1A_OID31102_CIS_IVs	NT5C1A	Wald ratio	1	-0.00564447	0.0161922	0.727396	NT5C1A	1	OID31102	Q9BXI3	Neurology_II
MAN2B2_OID30306_CIS_IVs	MAN2B2	Wald ratio	1	-0.00675752	0.0194279	0.727971	MAN2B2	4	OID30306	Q9Y2E5	Cardiometabolic_II
NPTX1_OID21074_CIS_IVs	NPTX1	Wald ratio	1	0.00456369	0.0131478	0.728511	NPTX1	17	OID21074	Q15818	Neurology
CD36_OID30485_CIS_IVs	CD36	Wald ratio	1	-0.00289722	0.00836975	0.729227	CD36	7	OID30485	P16671	Inflammation_II
CLGN_OID30957_CIS_IVs	CLGN	Wald ratio	1	-0.0047717	0.0138496	0.730442	CLGN	4	OID30957	O14967	Neurology_II
CCL2_OID21004_CIS_IVs	CCL2	Wald ratio	1	0.00953909	0.0277501	0.731034	CCL2	17	OID21004	P13500	Neurology
TEK_OID21496_CIS_IVs	TEK	Wald ratio	1	-0.00580681	0.0168926	0.731034	TEK	9	OID21496	Q02763	Oncology
ESAM_OID20270_CIS_IVs	ESAM	Wald ratio	1	-0.00956987	0.0280094	0.732602	ESAM	11	OID20270	Q96AP7	Cardiometabolic
CIRBP_OID31503_CIS_IVs	CIRBP	Wald ratio	1	-0.00182668	0.00538131	0.734271	CIRBP	19	OID31503	Q14011	Oncology_II
PALM_OID31515_CIS_IVs	PALM	Wald ratio	1	-0.00197272	0.00581154	0.734271	PALM	19	OID31515	O75781	Oncology_II
CRLF1_OID20699_CIS_IVs	CRLF1	Wald ratio	1	-0.00343495	0.0101617	0.735342	CRLF1	19	OID20699	O75462	Inflammation
TNFRSF1A_OID21155_CIS_IVs	TNFRSF1A	Wald ratio	1	0.00598614	0.0177921	0.736533	TNFRSF1A	12	OID21155	P19438	Neurology
NOS2_OID30087_CIS_IVs	NOS2	Wald ratio	1	0.00626711	0.0186808	0.73726	NOS2	17	OID30087	P35228	Cardiometabolic_II
MMP1_OID20672_CIS_IVs	MMP1	Wald ratio	1	0.00781657	0.0234497	0.738883	MMP1	11	OID20672	P03956	Inflammation
SCLY_OID21425_CIS_IVs	SCLY	Wald ratio	1	-0.00513008	0.0153902	0.738883	SCLY	2	OID21425	Q96I15	Oncology
ACVRL1_OID20999_CIS_IVs	ACVRL1	Wald ratio	1	-0.00752101	0.022772	0.741192	ACVRL1	12	OID20999	P37023	Neurology
CXCL6_OID20613_CIS_IVs	CXCL6	Wald ratio	1	0.00601053	0.0183178	0.742817	CXCL6	4	OID20613	P80162	Inflammation
CTSH_OID20113_CIS_IVs	CTSH	Wald ratio	1	0.00454899	0.0139069	0.74359	CTSH	15	OID20113	P09668	Cardiometabolic
ADAM22_OID21001_CIS_IVs	ADAM22	Wald ratio	1	-0.0038616	0.011971	0.747013	ADAM22	7	OID21001	Q9P0K1	Neurology
CYTL1_OID30374_CIS_IVs	CYTL1	Wald ratio	1	-0.00489623	0.0151952	0.747284	CYTL1	4	OID30374	Q9NRR1	Cardiometabolic_II
FEN1_OID21192_CIS_IVs	FEN1	Wald ratio	1	-0.00672465	0.0212247	0.751371	FEN1	11	OID21192	P39748	Oncology
PRUNE2_OID31270_CIS_IVs	PRUNE2	Wald ratio	1	-0.0060652	0.0192381	0.752556	PRUNE2	9	OID31270	Q8WUY3	Oncology_II
LMNB2_OID31109_CIS_IVs	LMNB2	Wald ratio	1	-0.0066133	0.0210423	0.753304	LMNB2	19	OID31109	Q03252	Neurology_II
TNFSF13_OID20733_CIS_IVs	TNFSF13	Wald ratio	1	0.00670484	0.0213336	0.753304	TNFSF13	17	OID20733	O75888	Inflammation
FGF23_OID21411_CIS_IVs	FGF23	Wald ratio	1	-0.00785451	0.0251344	0.754661	FGF23	12	OID21411	Q9GZV9	Oncology
PAMR1_OID21153_CIS_IVs	PAMR1	IVW	3	-0.00406482	0.01304	0.755255	PAMR1	11	OID21153	Q6UXH9	Neurology
PTGR1_OID30297_CIS_IVs	PTGR1	IVW	2	-0.00441768	0.0141875	0.755513	PTGR1	9	OID30297	Q14914	Cardiometabolic_II
CIAPIN1_OID21501_CIS_IVs	CIAPIN1	Wald ratio	1	0.00853989	0.0275316	0.75642	CIAPIN1	16	OID21501	Q6FI81	Oncology
CRTAC1_OID20279_CIS_IVs	CRTAC1	Wald ratio	1	-0.00641811	0.0207825	0.757456	CRTAC1	10	OID20279	Q9NQ79	Cardiometabolic
ST3GAL1_OID21322_CIS_IVs	ST3GAL1	Wald ratio	1	-0.00723903	0.0234407	0.757456	ST3GAL1	8	OID21322	Q11201	Oncology
CST5_OID20995_CIS_IVs	CST5	IVW	2	0.00322004	0.0104775	0.758593	CST5	20	OID20995	P28325	Neurology
CFHR4_OID30758_CIS_IVs	CFHR4	Wald ratio	1	-0.002616	0.00853043	0.759097	CFHR4	1	OID30758	Q92496	Inflammation_II
COL2A1_OID30286_CIS_IVs	COL2A1	Wald ratio	1	-0.00415834	0.0135598	0.759097	COL2A1	12	OID30286	P02458	Cardiometabolic_II
APOF_OID30701_CIS_IVs	APOF	Wald ratio	1	-0.00686225	0.0225082	0.760459	APOF	12	OID30701	Q13790	Inflammation_II
GBP4_OID20845_CIS_IVs	GBP4	Wald ratio	1	0.00491684	0.0162256	0.761867	GBP4	1	OID20845	Q96PP9	Neurology
PRELP_OID20766_CIS_IVs	PRELP	Wald ratio	1	0.00903697	0.0299155	0.762589	PRELP	1	OID20766	P51888	Inflammation
LGALS7_LGALS7B_OID21406_CIS_IVs	LGALS7B	Wald ratio	1	0.00632306	0.0209811	0.763132	LGALS7_LGALS7B	19	OID21406	P47929	Oncology
ASAH2_OID20996_CIS_IVs	ASAH2	Wald ratio	1	-0.00398267	0.0132225	0.763258	ASAH2	10	OID20996	Q9NR71	Neurology
RWDD1_OID21015_CIS_IVs	RWDD1	Wald ratio	1	0.00481287	0.0159856	0.763357	RWDD1	6	OID21015	Q9H446	Neurology
SFTPA2_OID21218_CIS_IVs	SFTPA2	Wald ratio	1	-0.00499658	0.0166015	0.763437	SFTPA2	10	OID21218	Q8IWL1	Oncology
CADPS_OID30915_CIS_IVs	CADPS	Wald ratio	1	-0.00745112	0.0248371	0.764177	CADPS	3	OID30915	Q9ULU8	Neurology_II
SMOC2_OID20730_CIS_IVs	SMOC2	Wald ratio	1	-0.00610547	0.0203516	0.764177	SMOC2	6	OID20730	Q9H3U7	Inflammation
MIA_OID21531_CIS_IVs	MIA	IVW	2	0.00253804	0.00853084	0.766074	MIA	19	OID21531	Q16674	Oncology
XCL1_OID21398_CIS_IVs	XCL1	Wald ratio	1	-0.00252157	0.00855142	0.768092	XCL1	1	OID21398	P47992	Oncology
MBL2_OID30759_CIS_IVs	MBL2	Wald ratio	1	-0.00326016	0.0111087	0.769157	MBL2	10	OID30759	P11226	Inflammation_II
TCN2_OID20341_CIS_IVs	TCN2	Wald ratio	1	0.00368253	0.0126487	0.770945	TCN2	22	OID20341	P20062	Cardiometabolic
CBX2_OID30177_CIS_IVs	CBX2	Wald ratio	1	-0.00603928	0.0208019	0.771569	CBX2	17	OID30177	Q14781	Cardiometabolic_II
SPINK2_OID30627_CIS_IVs	SPINK2	Wald ratio	1	0.00599685	0.0208779	0.773933	SPINK2	4	OID30627	P20155	Inflammation_II
CDA_OID30345_CIS_IVs	CDA	Wald ratio	1	-0.00525707	0.0183997	0.775097	CDA	1	OID30345	P32320	Cardiometabolic_II
CMIP_OID31406_CIS_IVs	CMIP	Wald ratio	1	0.00590642	0.0211388	0.779929	CMIP	16	OID31406	Q8IY22	Oncology_II
ICAM1_OID20411_CIS_IVs	ICAM1	Wald ratio	1	-0.0071787	0.0257781	0.780643	ICAM1	19	OID20411	P05362	Cardiometabolic
CA12_OID21344_CIS_IVs	CA12	Wald ratio	1	0.00649957	0.0236037	0.783038	CA12	15	OID21344	O43570	Oncology
VASN_OID20345_CIS_IVs	VASN	Wald ratio	1	-0.00588681	0.021428	0.783527	VASN	16	OID20345	Q6EMK4	Cardiometabolic
CRNN_OID21427_CIS_IVs	CRNN	Wald ratio	1	-0.00601474	0.0219669	0.784231	CRNN	1	OID21427	Q9UBG3	Oncology
TPMT_OID21270_CIS_IVs	TPMT	Wald ratio	1	0.00498668	0.0183953	0.786326	TPMT	6	OID21270	P51580	Oncology
YES1_OID21348_CIS_IVs	YES1	Wald ratio	1	-0.00540073	0.0199827	0.786952	YES1	18	OID21348	P07947	Oncology
RARRES1_OID21177_CIS_IVs	RARRES1	Wald ratio	1	-0.00458852	0.0170045	0.787282	RARRES1	3	OID21177	P49788	Oncology
CDH15_OID21005_CIS_IVs	CDH15	IVW	2	0.00356763	0.0132367	0.787525	CDH15	16	OID21005	P55291	Neurology
TGFB1_OID20621_CIS_IVs	TGFB1	Wald ratio	1	0.0065894	0.0245272	0.788194	TGFB1	19	OID20621	P01137	Inflammation
ROR1_OID20224_CIS_IVs	ROR1	Wald ratio	1	-0.00417512	0.0156113	0.789129	ROR1	1	OID20224	Q01973	Cardiometabolic
SERPINA4_OID30774_CIS_IVs	SERPINA4	Wald ratio	1	-0.0049242	0.0184658	0.789726	SERPINA4	14	OID30774	P29622	Inflammation_II
TNR_OID20957_CIS_IVs	TNR	Wald ratio	1	0.00560684	0.0211081	0.790528	TNR	1	OID20957	Q92752	Neurology
CEACAM21_OID20548_CIS_IVs	CEACAM21	Wald ratio	1	-0.00236753	0.00897168	0.791866	CEACAM21	19	OID20548	Q3KPI0	Inflammation
DKK3_OID20264_CIS_IVs	DKK3	IVW	2	0.0133165	0.0505637	0.792273	DKK3	11	OID20264	Q9UBP4	Cardiometabolic
OPLAH_OID30201_CIS_IVs	OPLAH	Wald ratio	1	-0.00188057	0.00714615	0.792429	OPLAH	8	OID30201	O14841	Cardiometabolic_II
PTPRZ1_OID30343_CIS_IVs	PTPRZ1	IVW	2	-0.0069625	0.0267438	0.794601	PTPRZ1	7	OID30343	P23471	Cardiometabolic_II
PTPRS_OID20306_CIS_IVs	PTPRS	Wald ratio	1	0.00632517	0.024302	0.794652	PTPRS	19	OID20306	Q13332	Cardiometabolic
SERPINA3_OID30786_CIS_IVs	SERPINA3	IVW	2	0.00689312	0.0266406	0.795832	SERPINA3	14	OID30786	P01011	Inflammation_II
GASK1A_OID30109_CIS_IVs	GASK1A	IVW	2	-0.00391314	0.0151592	0.796302	GASK1A	3	OID30109	Q9UFP1	Cardiometabolic_II
FCRL3_OID20443_CIS_IVs	FCRL3	Wald ratio	1	-0.00177935	0.00689499	0.796357	FCRL3	1	OID20443	Q96P31	Inflammation
PLA2G2A_OID20274_CIS_IVs	PLA2G2A	Wald ratio	1	0.00499763	0.0193658	0.796357	PLA2G2A	1	OID20274	P14555	Cardiometabolic
SFTPD_OID20214_CIS_IVs	SFTPD	Wald ratio	1	0.00224678	0.00870628	0.796357	SFTPD	10	OID20214	P35247	Cardiometabolic
HCG22_OID30088_CIS_IVs	HCG22	Wald ratio	1	-0.00336598	0.0130679	0.796734	HCG22	6	OID30088	E2RYF7	Cardiometabolic_II
SAG_OID30874_CIS_IVs	SAG	Wald ratio	1	-0.00626669	0.0243831	0.797172	SAG	2	OID30874	P10523	Neurology_II
COL28A1_OID30969_CIS_IVs	COL28A1	Wald ratio	1	-0.00279429	0.010883	0.797367	COL28A1	7	OID30969	Q2UY09	Neurology_II
PSAPL1_OID31473_CIS_IVs	PSAPL1	IVW	2	-0.00409199	0.0159571	0.797614	PSAPL1	4	OID31473	Q6NUJ1	Oncology_II
ENG_OID20287_CIS_IVs	ENG	Wald ratio	1	-0.00512942	0.0200047	0.797634	ENG	9	OID20287	P17813	Cardiometabolic
SGSH_OID30341_CIS_IVs	SGSH	Wald ratio	1	0.0027233	0.010723	0.79952	SGSH	17	OID30341	P51688	Cardiometabolic_II
CHP1_OID30869_CIS_IVs	CHP1	Wald ratio	1	0.00474353	0.0187679	0.800464	CHP1	15	OID30869	Q99653	Neurology_II
APLP1_OID20164_CIS_IVs	APLP1	Wald ratio	1	-0.00500538	0.0199077	0.801483	APLP1	19	OID20164	P51693	Cardiometabolic
HRG_OID30770_CIS_IVs	HRG	Wald ratio	1	-0.00382598	0.0153039	0.802587	HRG	3	OID30770	P04196	Inflammation_II
MGMT_OID20588_CIS_IVs	MGMT	Wald ratio	1	0.00399713	0.0162383	0.805563	MGMT	10	OID20588	P16455	Inflammation
CCL15_OID20328_CIS_IVs	CCL15	IVW	2	0.00141062	0.00574229	0.80595	CCL15	17	OID20328	Q16663	Cardiometabolic
CD55_OID20377_CIS_IVs	CD55	Wald ratio	1	0.00475043	0.0195295	0.807817	CD55	1	OID20377	P08174	Cardiometabolic
TCTN3_OID30326_CIS_IVs	TCTN3	Wald ratio	1	-0.00245371	0.0101215	0.808451	TCTN3	10	OID30326	Q6NUS6	Cardiometabolic_II
IL1R1_OID21116_CIS_IVs	IL1R1	Wald ratio	1	-0.00538822	0.0225632	0.811256	IL1R1	2	OID21116	P14778	Neurology
PRG2_OID30381_CIS_IVs	PRG2	Wald ratio	1	-0.00240747	0.0100813	0.811256	PRG2	11	OID30381	P13727	Cardiometabolic_II
PON3_OID20777_CIS_IVs	PON3	Wald ratio	1	-0.00430573	0.0180841	0.811807	PON3	7	OID20777	Q15166	Inflammation
SAT2_OID31306_CIS_IVs	SAT2	Wald ratio	1	-0.00523062	0.0219686	0.811807	SAT2	17	OID31306	Q96F10	Oncology_II
STOML2_OID31183_CIS_IVs	STOML2	Wald ratio	1	-0.00257115	0.0107988	0.811807	STOML2	9	OID31183	Q9UJZ1	Oncology_II
NCF2_OID20567_CIS_IVs	NCF2	Wald ratio	1	-0.0038862	0.0165163	0.81398	NCF2	1	OID20567	P19878	Inflammation
GPR37_OID20095_CIS_IVs	GPR37	Wald ratio	1	-0.00229311	0.0098469	0.815857	GPR37	7	OID20095	O15354	Cardiometabolic
CLEC4A_OID20573_CIS_IVs	CLEC4A	Wald ratio	1	0.00289939	0.0125974	0.817968	CLEC4A	12	OID20573	Q9UMR7	Inflammation
LZTFL1_OID30637_CIS_IVs	LZTFL1	IVW	2	-0.0191555	0.0843855	0.820424	LZTFL1	3	OID30637	Q9NQ48	Inflammation_II
CD7_OID30543_CIS_IVs	CD7	Wald ratio	1	0.00458401	0.0202662	0.821053	CD7	17	OID30543	P09564	Inflammation_II
SEMA4D_OID21020_CIS_IVs	SEMA4D	Wald ratio	1	-0.00428022	0.0189935	0.821705	SEMA4D	9	OID21020	Q92854	Neurology
MSR1_OID21063_CIS_IVs	MSR1	Wald ratio	1	-0.00568931	0.0252858	0.821979	MSR1	8	OID21063	P21757	Neurology
PLXDC1_OID21258_CIS_IVs	PLXDC1	Wald ratio	1	0.00489761	0.0220392	0.824141	PLXDC1	17	OID21258	Q8IUK5	Oncology
PROCR_OID30149_CIS_IVs	PROCR	Wald ratio	1	0.00282593	0.0127781	0.824973	PROCR	20	OID30149	Q9UNN8	Cardiometabolic_II
IFNAR1_OID31491_CIS_IVs	IFNAR1	Wald ratio	1	-0.00443699	0.0201144	0.825413	IFNAR1	21	OID31491	P17181	Oncology_II
HTR1A_OID30824_CIS_IVs	HTR1A	Wald ratio	1	-0.00457746	0.0208529	0.826251	HTR1A	5	OID30824	P08908	Neurology_II
WASF1_OID20091_CIS_IVs	WASF1	Wald ratio	1	-0.00552374	0.0255473	0.828819	WASF1	6	OID20091	Q92558	Cardiometabolic
CA14_OID21401_CIS_IVs	CA14	Wald ratio	1	0.00509125	0.0239477	0.83164	CA14	1	OID21401	Q9ULX7	Oncology
ACADSB_OID30356_CIS_IVs	ACADSB	Wald ratio	1	-0.00416544	0.0197654	0.833087	ACADSB	10	OID30356	P45954	Cardiometabolic_II
CLSTN1_OID20874_CIS_IVs	CLSTN1	Wald ratio	1	0.00466495	0.022525	0.835931	CLSTN1	1	OID20874	O94985	Neurology
CCL27_OID20121_CIS_IVs	CCL27	Wald ratio	1	0.00510701	0.0247494	0.836518	CCL27	9	OID20121	Q9Y4X3	Cardiometabolic
MRI1_OID30891_CIS_IVs	MRI1	IVW	2	-0.0063319	0.0307079	0.836636	MRI1	19	OID30891	Q9BV20	Neurology_II
RBP5_OID21369_CIS_IVs	RBP5	Wald ratio	1	0.00608978	0.0296877	0.837472	RBP5	12	OID21369	P82980	Oncology
SERPINA12_OID20219_CIS_IVs	SERPINA12	Wald ratio	1	-0.0021813	0.0106338	0.837472	SERPINA12	14	OID20219	Q8IW75	Cardiometabolic
ADAMTS13_OID20249_CIS_IVs	ADAMTS13	Wald ratio	1	-0.00334779	0.0164998	0.839214	ADAMTS13	9	OID20249	Q76LX8	Cardiometabolic
PRDX2_OID30668_CIS_IVs	PRDX2	Wald ratio	1	-0.00260543	0.0128643	0.839501	PRDX2	19	OID30668	P32119	Inflammation_II
CTRC_OID20752_CIS_IVs	CTRC	Wald ratio	1	0.00522043	0.0261022	0.841481	CTRC	1	OID20752	Q99895	Inflammation
TGM2_OID20141_CIS_IVs	TGM2	Wald ratio	1	0.004507	0.0232284	0.846153	TGM2	20	OID20141	P21980	Cardiometabolic
DKKL1_OID21313_CIS_IVs	DKKL1	Wald ratio	1	0.00127369	0.00658076	0.84653	DKKL1	19	OID21313	Q9UK85	Oncology
HBQ1_OID21433_CIS_IVs	HBQ1	Wald ratio	1	-0.00398238	0.0205757	0.84653	HBQ1	16	OID21433	P09105	Oncology
LILRB1_OID20323_CIS_IVs	LILRB1	IVW	3	-0.00257184	0.0133254	0.846956	LILRB1	19	OID20323	Q8NHL6	Cardiometabolic
LEP_OID20187_CIS_IVs	LEP	Wald ratio	1	0.00248709	0.01295	0.847701	LEP	7	OID20187	P41159	Cardiometabolic
CA5A_OID20075_CIS_IVs	CA5A	IVW	2	-0.00503386	0.0267892	0.85095	CA5A	16	OID20075	P35218	Cardiometabolic
CALCB_OID31100_CIS_IVs	CALCB	Wald ratio	1	0.00535307	0.0285497	0.851269	CALCB	11	OID31100	P10092	Neurology_II
MYOC_OID21121_CIS_IVs	MYOC	Wald ratio	1	-0.00426347	0.0228881	0.852229	MYOC	1	OID21121	Q99972	Neurology
LEFTY2_OID21454_CIS_IVs	LEFTY2	IVW	2	0.00173678	0.00942923	0.853864	LEFTY2	1	OID21454	O00292	Oncology
POSTN_OID30410_CIS_IVs	POSTN	IVW	2	-0.00290607	0.0158179	0.854233	POSTN	13	OID30410	Q15063	Cardiometabolic_II
EVI5_OID30519_CIS_IVs	EVI5	Wald ratio	1	0.00389402	0.0212674	0.854721	EVI5	1	OID30519	O60447	Inflammation_II
NRP2_OID21081_CIS_IVs	NRP2	Wald ratio	1	0.00497801	0.0272131	0.854855	NRP2	2	OID21081	O60462	Neurology
FDX1_OID30078_CIS_IVs	FDX1	Wald ratio	1	0.00471715	0.0263606	0.857979	FDX1	11	OID30078	P10109	Cardiometabolic_II
CDHR2_OID21282_CIS_IVs	CDHR2	Wald ratio	1	0.00166968	0.00946153	0.859924	CDHR2	5	OID21282	Q9BYE9	Oncology
ANGPTL1_OID20211_CIS_IVs	ANGPTL1	Wald ratio	1	-0.00339528	0.0194457	0.861391	ANGPTL1	1	OID20211	O95841	Cardiometabolic
RABGAP1L_OID20447_CIS_IVs	RABGAP1L	Wald ratio	1	-0.0041011	0.0234881	0.861391	RABGAP1L	1	OID20447	Q5R372	Inflammation
SCARB2_OID20943_CIS_IVs	SCARB2	Wald ratio	1	-0.00464635	0.0270069	0.863404	SCARB2	4	OID20943	Q14108	Neurology
FN1_OID30787_CIS_IVs	FN1	Wald ratio	1	0.00336515	0.0199105	0.865786	FN1	2	OID30787	P02751	Inflammation_II
ENPP5_OID20736_CIS_IVs	ENPP5	Wald ratio	1	-0.00146452	0.00878715	0.867632	ENPP5	6	OID20736	Q9UJA9	Inflammation
NTRK3_OID21057_CIS_IVs	NTRK3	Wald ratio	1	-0.00371212	0.0222727	0.867632	NTRK3	15	OID21057	Q16288	Neurology
DLK1_OID20295_CIS_IVs	DLK1	Wald ratio	1	-0.00310442	0.0188653	0.869293	DLK1	14	OID20295	P80370	Cardiometabolic
IL1RAP_OID21126_CIS_IVs	IL1RAP	Wald ratio	1	0.00106908	0.00654809	0.87031	IL1RAP	3	OID21126	Q9NPH3	Neurology
RETN_OID20327_CIS_IVs	RETN	Wald ratio	1	-0.00344407	0.021331	0.871732	RETN	19	OID20327	Q9HD89	Cardiometabolic
ITGBL1_OID30408_CIS_IVs	ITGBL1	Wald ratio	1	-0.00272499	0.0170312	0.872881	ITGBL1	13	OID30408	O95965	Cardiometabolic_II
IL12RB1_OID20486_CIS_IVs	IL12RB1	Wald ratio	1	-0.00322151	0.0206556	0.876062	IL12RB1	19	OID20486	P42701	Inflammation
FAM3B_OID21372_CIS_IVs	FAM3B	Wald ratio	1	0.00327585	0.0218827	0.881001	FAM3B	21	OID21372	P58499	Oncology
ADAMTS8_OID21502_CIS_IVs	ADAMTS8	Wald ratio	1	0.00253539	0.0172406	0.883086	ADAMTS8	11	OID21502	Q9UP79	Oncology
NFKBIE_OID21212_CIS_IVs	NFKBIE	Wald ratio	1	0.00246829	0.0170881	0.88515	NFKBIE	6	OID21212	O00221	Oncology
LACRT_OID31367_CIS_IVs	LACRT	Wald ratio	1	0.00145143	0.01016	0.886403	LACRT	12	OID31367	Q9GZZ8	Oncology_II
TCL1B_OID20058_CIS_IVs	TCL1B	Wald ratio	1	0.00549582	0.0388372	0.887468	TCL1B	14	OID20058	O95988	Cardiometabolic
PDCD5_OID21021_CIS_IVs	PDCD5	Wald ratio	1	-0.00294176	0.0208865	0.887992	PDCD5	19	OID21021	O14737	Neurology
VSTM1_OID20851_CIS_IVs	VSTM1	IVW	2	-0.00131013	0.00932579	0.888277	VSTM1	19	OID20851	Q6UX27	Neurology
BST2_OID21029_CIS_IVs	BST2	Wald ratio	1	0.00174274	0.0126971	0.890829	BST2	19	OID21029	Q10589	Neurology
RCC1_OID31356_CIS_IVs	RCC1	Wald ratio	1	-0.000831439	0.0062358	0.89393	RCC1	1	OID31356	P18754	Oncology_II
OLFM4_OID30665_CIS_IVs	OLFM4	Wald ratio	1	0.00154842	0.0118067	0.895659	OLFM4	13	OID30665	Q6UX06	Inflammation_II
TXNDC15_OID21495_CIS_IVs	TXNDC15	Wald ratio	1	0.00109497	0.00839477	0.896222	TXNDC15	5	OID21495	Q96J42	Oncology
HDGF_OID21455_CIS_IVs	HDGF	IVW	2	0.000841907	0.00650178	0.896971	HDGF	1	OID21455	P51858	Oncology
NDUFA5_OID30520_CIS_IVs	NDUFA5	Wald ratio	1	0.00112812	0.0087743	0.897697	NDUFA5	7	OID30520	Q16718	Inflammation_II
VIT_OID30334_CIS_IVs	VIT	IVW	2	0.00169577	0.0132411	0.898094	VIT	2	OID30334	Q6UXI7	Cardiometabolic_II
GGACT_OID30290_CIS_IVs	GGACT	Wald ratio	1	0.0016521	0.0132168	0.900524	GGACT	13	OID30290	Q9BVM4	Cardiometabolic_II
S100A4_OID21519_CIS_IVs	S100A4	Wald ratio	1	0.00170645	0.0136516	0.900524	S100A4	1	OID21519	P26447	Oncology
CALCA_OID20983_CIS_IVs	CALCA	Wald ratio	1	-0.0149568	0.119953	0.90077	CALCA	11	OID20983	P01258	Neurology
ART5_OID30828_CIS_IVs	ART5	Wald ratio	1	-0.00257362	0.0206604	0.900866	ART5	11	OID30828	Q96L15	Neurology_II
IGDCC4_OID30402_CIS_IVs	IGDCC4	Wald ratio	1	-0.00267559	0.0220736	0.903523	IGDCC4	15	OID30402	Q8TDY8	Cardiometabolic_II
ART3_OID20346_CIS_IVs	ART3	Wald ratio	1	0.00285385	0.024128	0.905846	ART3	4	OID20346	Q13508	Cardiometabolic
STAB2_OID30401_CIS_IVs	STAB2	Wald ratio	1	-0.00209196	0.0179124	0.907028	STAB2	12	OID30401	Q8WWQ8	Cardiometabolic_II
CNTN5_OID21006_CIS_IVs	CNTN5	Wald ratio	1	-0.00175548	0.0150469	0.907124	CNTN5	11	OID21006	O94779	Neurology
FCN2_OID20382_CIS_IVs	FCN2	Wald ratio	1	-0.00163489	0.0141009	0.907698	FCN2	9	OID20382	Q15485	Cardiometabolic
FCRLB_OID21193_CIS_IVs	FCRLB	IVW	2	0.00189392	0.016569	0.908996	FCRLB	1	OID21193	Q6BAA4	Oncology
CNDP1_OID20347_CIS_IVs	CNDP1	Wald ratio	1	-0.00273025	0.0245722	0.911528	CNDP1	18	OID20347	Q96KN2	Cardiometabolic
EVI2B_OID31227_CIS_IVs	EVI2B	Wald ratio	1	-0.00233277	0.0209949	0.911528	EVI2B	17	OID31227	P34910	Oncology_II
LRTM2_OID31020_CIS_IVs	LRTM2	Wald ratio	1	-0.0024312	0.0218808	0.911528	LRTM2	12	OID31020	Q8N967	Neurology_II
PTPN6_OID20717_CIS_IVs	PTPN6	Wald ratio	1	-0.000626594	0.00563935	0.911528	PTPN6	12	OID20717	P29350	Inflammation
CA4_OID20241_CIS_IVs	CA4	Wald ratio	1	-0.00233306	0.0215465	0.913773	CA4	17	OID20241	P22748	Cardiometabolic
GRIN2B_OID30802_CIS_IVs	GRIN2B	Wald ratio	1	0.00119763	0.0110781	0.91391	GRIN2B	12	OID30802	Q13224	Neurology_II
CLEC10A_OID20928_CIS_IVs	CLEC10A	Wald ratio	1	-0.00166455	0.0154565	0.91424	CLEC10A	17	OID20928	Q8IUN9	Neurology
CD8A_OID21018_CIS_IVs	CD8A	Wald ratio	1	0.00149734	0.0139253	0.914371	CD8A	2	OID21018	P01732	Neurology
MPO_OID21100_CIS_IVs	MPO	Wald ratio	1	-0.00255315	0.024255	0.916167	MPO	17	OID21100	P05164	Neurology
ZP3_OID30265_CIS_IVs	ZP3	Wald ratio	1	0.000767686	0.00745752	0.91801	ZP3	7	OID30265	P21754	Cardiometabolic_II
DNAJC21_OID31104_CIS_IVs	DNAJC21	IVW	2	-0.00289875	0.0281741	0.918053	DNAJC21	5	OID31104	Q5F1R6	Neurology_II
HNRNPUL1_OID31037_CIS_IVs	HNRNPUL1	Wald ratio	1	-0.00115211	0.0112069	0.918119	HNRNPUL1	19	OID31037	Q9BUJ2	Neurology_II
PAIP2B_OID31228_CIS_IVs	PAIP2B	Wald ratio	1	-0.00222813	0.0217242	0.918309	PAIP2B	2	OID31228	Q9ULR5	Oncology_II
OGFR_OID21360_CIS_IVs	OGFR	Wald ratio	1	0.00385229	0.0378095	0.918847	OGFR	20	OID21360	Q9NZT2	Oncology
MMP7_OID20087_CIS_IVs	MMP7	IVW	2	0.00155022	0.0153828	0.919728	MMP7	11	OID20087	P09237	Cardiometabolic
KAZN_OID31481_CIS_IVs	KAZN	Wald ratio	1	0.00139769	0.0141039	0.92106	KAZN	1	OID31481	Q674X7	Oncology_II
EFEMP1_OID20414_CIS_IVs	EFEMP1	Wald ratio	1	0.00283558	0.029166	0.92255	EFEMP1	2	OID20414	Q12805	Cardiometabolic
MDGA1_OID20951_CIS_IVs	MDGA1	Wald ratio	1	0.000630863	0.00651892	0.922906	MDGA1	6	OID20951	Q8NFP4	Neurology
UBE2L6_OID30321_CIS_IVs	UBE2L6	Wald ratio	1	0.0023041	0.0249611	0.926454	UBE2L6	11	OID30321	O14933	Cardiometabolic_II
MORF4L1_OID31257_CIS_IVs	MORF4L1	Wald ratio	1	0.000789022	0.00861349	0.927013	MORF4L1	15	OID31257	Q9UBU8	Oncology_II
SERPINA1_OID30750_CIS_IVs	SERPINA1	Wald ratio	1	-0.00178288	0.0198098	0.928287	SERPINA1	14	OID30750	P01009	Inflammation_II
CEACAM16_OID31495_CIS_IVs	CEACAM16	Wald ratio	1	0.00187159	0.0213074	0.930006	CEACAM16	19	OID31495	Q2WEN9	Oncology_II
CPQ_OID30406_CIS_IVs	CPQ	IVW	2	-0.00127835	0.014577	0.930118	CPQ	8	OID30406	Q9Y646	Cardiometabolic_II
TPSD1_OID30982_CIS_IVs	TPSD1	IVW	2	0.00142394	0.0163084	0.930423	TPSD1	16	OID30982	Q9BZJ3	Neurology_II
CD70_OID20599_CIS_IVs	CD70	Wald ratio	1	-0.00143122	0.016459	0.930706	CD70	19	OID20599	P32970	Inflammation
CFC1_OID21261_CIS_IVs	CFC1	Wald ratio	1	0.00104651	0.0120348	0.930706	CFC1	2	OID21261	P0CG37	Oncology
DYNC1H1_OID31341_CIS_IVs	DYNC1H1	Wald ratio	1	-0.00171475	0.0198148	0.931038	DYNC1H1	14	OID31341	Q14204	Oncology_II
TGFBR2_OID21493_CIS_IVs	TGFBR2	Wald ratio	1	0.00150855	0.0175099	0.931344	TGFBR2	3	OID21493	P37173	Oncology
LRG1_OID30751_CIS_IVs	LRG1	Wald ratio	1	0.00230209	0.0270495	0.932177	LRG1	19	OID30751	P02750	Inflammation_II
VWC2L_OID31002_CIS_IVs	VWC2L	Wald ratio	1	0.00191346	0.0226426	0.932653	VWC2L	2	OID31002	B2RUY7	Neurology_II
CRACR2A_OID21249_CIS_IVs	CRACR2A	Wald ratio	1	-0.00264986	0.0317983	0.933586	CRACR2A	12	OID21249	Q9BSW2	Oncology
PEAR1_OID20257_CIS_IVs	PEAR1	Wald ratio	1	-0.00122605	0.0148659	0.93427	PEAR1	1	OID20257	Q5VY43	Cardiometabolic
DPP10_OID20527_CIS_IVs	DPP10	Wald ratio	1	0.00164553	0.0204046	0.935724	DPP10	2	OID20527	Q8N608	Inflammation
WDR46_OID31389_CIS_IVs	WDR46	Wald ratio	1	0.00185409	0.0229907	0.935724	WDR46	6	OID31389	O15213	Oncology_II
CLSTN2_OID20664_CIS_IVs	CLSTN2	Wald ratio	1	0.0014998	0.0187475	0.936237	CLSTN2	3	OID20664	Q9H4D0	Inflammation
SPARCL1_OID20361_CIS_IVs	SPARCL1	Wald ratio	1	-0.000917147	0.0114643	0.936237	SPARCL1	4	OID20361	Q14515	Cardiometabolic
C1RL_OID30721_CIS_IVs	C1RL	Wald ratio	1	0.00192191	0.0245577	0.937621	C1RL	12	OID30721	Q9NZP8	Inflammation_II
TNFRSF10C_OID20265_CIS_IVs	TNFRSF10C	Wald ratio	1	-0.00186379	0.02454	0.939459	TNFRSF10C	8	OID20265	O14798	Cardiometabolic
FCAMR_OID30332_CIS_IVs	FCAMR	Wald ratio	1	-0.00122539	0.0165427	0.940951	FCAMR	1	OID30332	Q8WWV6	Cardiometabolic_II
CST3_OID20400_CIS_IVs	CST3	Wald ratio	1	0.00202859	0.0279945	0.942233	CST3	20	OID20400	P01034	Cardiometabolic
CCL8_OID21466_CIS_IVs	CCL8	Wald ratio	1	-0.000800378	0.0110719	0.942372	CCL8	17	OID21466	P80075	Oncology
NELL1_OID21494_CIS_IVs	NELL1	Wald ratio	1	-0.00147182	0.0211311	0.944471	NELL1	11	OID21494	Q92832	Oncology
ADGRB3_OID20974_CIS_IVs	ADGRB3	IVW	2	0.000440514	0.00632868	0.944507	ADGRB3	6	OID20974	O60242	Neurology
KLK11_OID21518_CIS_IVs	KLK11	IVW	2	0.000877596	0.0127727	0.945221	KLK11	19	OID21518	Q9UBX7	Oncology
BLMH_OID20336_CIS_IVs	BLMH	Wald ratio	1	-0.000645196	0.0100005	0.948559	BLMH	17	OID20336	Q13867	Cardiometabolic
GFRAL_OID31091_CIS_IVs	GFRAL	IVW	2	0.00221564	0.0346722	0.949048	GFRAL	6	OID31091	Q6UXV0	Neurology_II
BNIP3L_OID30525_CIS_IVs	BNIP3L	Wald ratio	1	0.00152088	0.0239539	0.949375	BNIP3L	8	OID30525	O60238	Inflammation_II
IL10RB_OID20696_CIS_IVs	IL10RB	Wald ratio	1	0.00103627	0.0163212	0.949375	IL10RB	21	OID20696	Q08334	Inflammation
GFRA1_OID21457_CIS_IVs	GFRA1	Wald ratio	1	-0.00171548	0.0271617	0.949641	GFRA1	10	OID21457	P56159	Oncology
C2_OID20410_CIS_IVs	C2	IVW	2	-0.000678806	0.0107812	0.949797	C2	6	OID20410	P06681	Cardiometabolic
KRT8_OID30865_CIS_IVs	KRT8	Wald ratio	1	0.00151772	0.0241456	0.94988	KRT8	12	OID30865	P05787	Neurology_II
C19orf12_OID20804_CIS_IVs	C19orf12	Wald ratio	1	0.00104702	0.0169617	0.950779	C19orf12	19	OID20804	Q9NSK7	Neurology
NTF4_OID21208_CIS_IVs	NTF4	Wald ratio	1	0.000499261	0.00833766	0.952251	NTF4	19	OID21208	P34130	Oncology
IL11_OID20455_CIS_IVs	IL11	Wald ratio	1	0.00181112	0.0304267	0.952535	IL11	19	OID20455	P20809	Inflammation
PGD_OID30344_CIS_IVs	PGD	Wald ratio	1	-0.0005014	0.00877449	0.954431	PGD	1	OID30344	P52209	Cardiometabolic_II
PON1_OID30704_CIS_IVs	PON1	IVW	3	0.000741848	0.0129849	0.95444	PON1	7	OID30704	P27169	Inflammation_II
GRIK2_OID30977_CIS_IVs	GRIK2	IVW	2	-0.000758433	0.0135438	0.955343	GRIK2	6	OID30977	Q13002	Neurology_II
VNN2_OID21310_CIS_IVs	VNN2	Wald ratio	1	0.000840983	0.0151377	0.955696	VNN2	6	OID21310	O95498	Oncology
HSPB1_OID20230_CIS_IVs	HSPB1	IVW	2	-0.000529215	0.00969909	0.956486	HSPB1	7	OID20230	P04792	Cardiometabolic
SBSN_OID30398_CIS_IVs	SBSN	Wald ratio	1	-0.000743091	0.013933	0.957466	SBSN	19	OID30398	Q6UWP8	Cardiometabolic_II
DPT_OID20278_CIS_IVs	DPT	Wald ratio	1	-0.000969013	0.0184113	0.958025	DPT	1	OID20278	Q07507	Cardiometabolic
FCGR2A_OID20391_CIS_IVs	FCGR2A	IVW	2	-0.000373817	0.00720751	0.958636	FCGR2A	1	OID20391	P12318	Cardiometabolic
ICAM3_OID20277_CIS_IVs	ICAM3	Wald ratio	1	-0.000995555	0.0194133	0.959101	ICAM3	19	OID20277	P32942	Cardiometabolic
FCRL1_OID20172_CIS_IVs	FCRL1	Wald ratio	1	-0.000855569	0.0179669	0.96202	FCRL1	1	OID20172	Q96LA6	Cardiometabolic
LELP1_OID30845_CIS_IVs	LELP1	Wald ratio	1	-0.00101702	0.0213575	0.96202	LELP1	1	OID30845	Q5T871	Neurology_II
TPK1_OID30338_CIS_IVs	TPK1	Wald ratio	1	0.000848304	0.0178144	0.96202	TPK1	7	OID30338	Q9H3S4	Cardiometabolic_II
CRYM_OID30815_CIS_IVs	CRYM	Wald ratio	1	-0.0012127	0.0262752	0.963188	CRYM	16	OID30815	Q14894	Neurology_II
STX7_OID30560_CIS_IVs	STX7	Wald ratio	1	0.000744061	0.0161213	0.963188	STX7	6	OID30560	O15400	Inflammation_II
CAMLG_OID30952_CIS_IVs	CAMLG	Wald ratio	1	0.000456116	0.0100346	0.963745	CAMLG	5	OID30952	P49069	Neurology_II
NCAM2_OID21095_CIS_IVs	NCAM2	Wald ratio	1	0.000496204	0.0112473	0.964811	NCAM2	21	OID21095	O15394	Neurology
HS3ST3B1_OID21303_CIS_IVs	HS3ST3B1	Wald ratio	1	-0.000749472	0.0172378	0.96532	HS3ST3B1	17	OID21303	Q9Y662	Oncology
BMP6_OID20111_CIS_IVs	BMP6	IVW	2	0.000680984	0.0161602	0.966387	BMP6	6	OID20111	P22004	Cardiometabolic
LPA_OID30747_CIS_IVs	LPA	IVW	2	0.00146049	0.0358256	0.967482	LPA	6	OID30747	P08519	Inflammation_II
KLRK1_OID31082_CIS_IVs	KLRK1	Wald ratio	1	-0.000568158	0.0140146	0.967662	KLRK1	12	OID31082	P26718	Neurology_II
CDNF_OID21318_CIS_IVs	CDNF	Wald ratio	1	0.000943459	0.0233506	0.967771	CDNF	10	OID21318	Q49AH0	Oncology
CNGB3_OID30805_CIS_IVs	CNGB3	Wald ratio	1	0.00100148	0.0253709	0.968513	CNGB3	8	OID30805	Q9NQW8	Neurology_II
FAP_OID20330_CIS_IVs	FAP	Wald ratio	1	-0.000876613	0.0223935	0.968774	FAP	2	OID20330	Q12884	Cardiometabolic
RGL2_OID31297_CIS_IVs	RGL2	Wald ratio	1	-0.000729592	0.0187505	0.968962	RGL2	6	OID31297	O15211	Oncology_II
VSIR_OID20131_CIS_IVs	VSIR	Wald ratio	1	-0.000749234	0.0232263	0.974266	VSIR	10	OID20131	Q9H7M9	Cardiometabolic
PCBP2_OID31003_CIS_IVs	PCBP2	Wald ratio	1	-0.000798027	0.0251379	0.974675	PCBP2	12	OID31003	Q15366	Neurology_II
IL17RB_OID20585_CIS_IVs	IL17RB	Wald ratio	1	-0.000282603	0.00904329	0.97507	IL17RB	3	OID20585	Q9NRM6	Inflammation
KLK13_OID21291_CIS_IVs	KLK13	Wald ratio	1	0.000486316	0.0158053	0.975454	KLK13	19	OID21291	Q9UKR3	Oncology
HAVCR1_OID21422_CIS_IVs	HAVCR1	Wald ratio	1	0.000486451	0.0167826	0.976876	HAVCR1	5	OID21422	Q96D42	Oncology
IL6_OID20101_CIS_IVs	IL6	Wald ratio	1	-0.000190473	0.00671416	0.977368	IL6	7	OID20101	P05231	Cardiometabolic
IL6_OID20563_CIS_IVs	IL6	Wald ratio	1	-0.000190473	0.00671416	0.977368	IL6	7	OID20563	P05231	Inflammation
IL6_OID20911_CIS_IVs	IL6	Wald ratio	1	-0.000190473	0.00671416	0.977368	IL6	7	OID20911	P05231	Neurology
IL6_OID21276_CIS_IVs	IL6	Wald ratio	1	-0.000190473	0.00671416	0.977368	IL6	7	OID21276	P05231	Oncology
ANGPTL7_OID21412_CIS_IVs	ANGPTL7	Wald ratio	1	-0.000519642	0.018967	0.978143	ANGPTL7	1	OID21412	O43827	Oncology
QSOX1_OID30729_CIS_IVs	QSOX1	Wald ratio	1	-0.000591926	0.0221972	0.978726	QSOX1	1	OID30729	O00391	Inflammation_II
CD4_OID20584_CIS_IVs	CD4	Wald ratio	1	0.000511398	0.0194331	0.979005	CD4	12	OID20584	P01730	Inflammation
UROS_OID30964_CIS_IVs	UROS	Wald ratio	1	-0.000642234	0.0256893	0.980055	UROS	10	OID30964	P10746	Neurology_II
CFHR2_OID30720_CIS_IVs	CFHR2	IVW	2	0.00015492	0.00796103	0.984474	CFHR2	1	OID30720	P36980	Inflammation_II
KLKB1_OID30760_CIS_IVs	KLKB1	Wald ratio	1	0.00033164	0.0170795	0.984508	KLKB1	4	OID30760	P03952	Inflammation_II
C1QA_OID20654_CIS_IVs	C1QA	Wald ratio	1	-0.000316784	0.0174231	0.985494	C1QA	1	OID20654	P02745	Inflammation
DRAXIN_OID20917_CIS_IVs	DRAXIN	Wald ratio	1	0.000398886	0.0259276	0.987725	DRAXIN	1	OID20917	Q8NBI3	Neurology
TNN_OID30412_CIS_IVs	TNN	Wald ratio	1	-0.000111395	0.00724068	0.987725	TNN	1	OID30412	Q9UQP3	Cardiometabolic_II
DEFB103A_DEFB103B_OID30534_CIS_IVs	DEFB103B	Wald ratio	1	0.000362169	0.0264384	0.98907	DEFB103A_DEFB103B	8	OID30534	P81534	Inflammation_II
APOD_OID30746_CIS_IVs	APOD	Wald ratio	1	-0.000366858	0.0275144	0.989362	APOD	3	OID30746	P05090	Inflammation_II
EPHA10_OID20840_CIS_IVs	EPHA10	Wald ratio	1	0.000123406	0.0159193	0.993815	EPHA10	1	OID20840	Q5JZY3	Neurology
CDH6_OID20157_CIS_IVs	CDH6	IVW	2	-1.71305e-05	0.0242851	0.999437	CDH6	5	OID20157	P55285	Cardiometabolic
LGALS3_OID20284_CIS_IVs	LGALS3	IVW	2	1.14312e-07	0.0107193	0.999991	LGALS3	14	OID20284	P17931	Cardiometabolic
CCL23_OID20693_CIS_IVs	CCL23	Wald ratio	1	0	0.0190929	1	CCL23	17	OID20693	P55773	Inflammation
CDKN1A_OID21319_CIS_IVs	CDKN1A	Wald ratio	1	0	0.0216573	1	CDKN1A	6	OID21319	P38936	Oncology
CLEC4C_OID20547_CIS_IVs	CLEC4C	Wald ratio	1	0	0.00918436	1	CLEC4C	12	OID20547	Q8WTT0	Inflammation
FCRL2_OID20639_CIS_IVs	FCRL2	Wald ratio	1	0	0.00987893	1	FCRL2	1	OID20639	Q96LA5	Inflammation
GFRA2_OID21330_CIS_IVs	GFRA2	Wald ratio	1	0	0.0199502	1	GFRA2	8	OID21330	O00451	Oncology
TYRP1_OID30517_CIS_IVs	TYRP1	Wald ratio	1	0	0.0213038	1	TYRP1	9	OID30517	P17643	Inflammation_II

## Sheet: ST5
Assay_gene_symbol	Panel	OlinkID	UniProt	Percent Samples Above LOD in KARMA
A1BG	Inflammation_II	OID30771	P04217	100
AAMDC	Cardiometabolic_II	OID30236	Q9H7C9	98.1605
AARSD1	Oncology	OID21311	Q9BTE6	100
ABCA2	Cardiometabolic_II	OID30146	Q9BZC7	93.9799
ABHD14B	Neurology	OID20921	Q96IU4	100
ABL1	Oncology	OID21280	P00519	100
ABO	Inflammation_II	OID30675	P16442	63.2107
ABRAXAS2	Cardiometabolic_II	OID30130	Q15018	8.52843
ACAA1	Oncology	OID21269	P09110	70.0669
ACADM	Oncology_II	OID31277	P11310	31.9398
ACADSB	Cardiometabolic_II	OID30356	P45954	66.0535
ACAN	Cardiometabolic	OID20159	P16112	100
ACE	Inflammation_II	OID30696	P12821	99.6656
ACE2	Cardiometabolic	OID20105	Q9BYF1	100
ACHE	Inflammation_II	OID30585	P22303	100
ACOT13	Oncology_II	OID31522	Q9NPJ3	98.8294
ACOX1	Cardiometabolic	OID20124	Q15067	11.0368
ACP1	Inflammation_II	OID30524	P24666	78.9298
ACP5	Cardiometabolic	OID20314	P13686	100
ACP6	Oncology	OID21432	Q9NPH0	100
ACRBP	Oncology_II	OID31385	Q8NEB7	83.2776
ACRV1	Inflammation_II	OID30513	P26436	39.2977
ACSL1	Cardiometabolic_II	OID30080	P33121	16.2207
ACTA2	Cardiometabolic	OID20079	P62736	98.9967
ACTN2	Cardiometabolic_II	OID30192	P35609	77.9264
ACTN4	Inflammation	OID20435	O43707	10.5351
ACVRL1	Neurology	OID20999	P37023	100
ACY1	Cardiometabolic	OID20137	Q03154	100
ACY3	Cardiometabolic_II	OID30086	Q96HD9	100
ACYP1	Inflammation_II	OID30642	P07311	100
ADA	Inflammation	OID20645	P00813	100
ADA2	Cardiometabolic	OID20394	Q9NZK5	100
ADAM12	Inflammation_II	OID30491	O43184	94.9833
ADAM15	Cardiometabolic	OID20109	Q13444	100
ADAM22	Neurology	OID21001	Q9P0K1	100
ADAM23	Inflammation	OID20651	O75077	100
ADAM8	Neurology	OID21039	P78325	100
ADAM9	Oncology_II	OID31488	Q13443	100
ADAMTS1	Inflammation_II	OID30528	Q9UHI8	89.2977
ADAMTS13	Cardiometabolic	OID20249	Q76LX8	100
ADAMTS15	Oncology	OID21275	Q8TE58	100
ADAMTS16	Cardiometabolic	OID20089	Q8TE57	99.8328
ADAMTS4	Inflammation_II	OID30471	O75173	58.0268
ADAMTS8	Oncology	OID21502	Q9UP79	100
ADAMTSL2	Cardiometabolic_II	OID30370	Q86TH1	100
ADAMTSL4	Cardiometabolic_II	OID30275	Q6UY14	100
ADAMTSL5	Cardiometabolic_II	OID30355	Q6ZMM2	100
ADCYAP1R1	Oncology	OID21188	P41586	50.3344
ADD1	Inflammation_II	OID30655	P35611	100
ADGRB3	Neurology	OID20974	O60242	100
ADGRD1	Inflammation_II	OID30588	Q6QNK2	100
ADGRE1	Oncology_II	OID31483	Q14246	100
ADGRE2	Inflammation	OID20755	Q9UHX3	100
ADGRE5	Cardiometabolic	OID20260	P48960	100
ADGRF5	Cardiometabolic_II	OID30349	Q8IZF2	100
ADGRG1	Oncology	OID21294	Q9Y653	100
ADGRG2	Cardiometabolic	OID20189	Q8IZP9	100
ADGRV1	Neurology_II	OID30877	Q8WXG9	10.8696
ADH1B	Inflammation_II	OID30612	P00325	99.8328
ADH4	Cardiometabolic	OID20117	P08319	100
ADIPOQ	Inflammation_II	OID30748	Q15848	100
ADM	Oncology	OID21467	P35318	100
ADRA2A	Cardiometabolic_II	OID30067	P08913	26.4214
AFAP1	Inflammation_II	OID30569	Q8N556	27.592
AFM	Inflammation_II	OID30741	P43652	100
AFP	Neurology	OID20978	P02771	100
AGBL2	Neurology_II	OID30793	Q5U5Z8	29.7659
AGER	Inflammation	OID20756	Q15109	100
AGR2	Neurology	OID20896	O95994	69.7324
AGR3	Oncology	OID21243	Q8TD06	26.087
AGRN	Inflammation	OID20786	O00468	100
AGRP	Inflammation	OID20658	O00253	100
AGT	Inflammation_II	OID30709	P01019	100
AGXT	Cardiometabolic	OID20139	P21549	100
AHCY	Cardiometabolic	OID20199	P23526	99.6656
AHNAK	Cardiometabolic_II	OID30260	Q09666	100
AHNAK2	Cardiometabolic_II	OID30244	Q8IVF2	100
AHSA1	Oncology_II	OID31379	O95433	67.3913
AHSG	Inflammation_II	OID30706	P02765	100
AHSP	Neurology	OID21078	Q9NZD4	100
AIDA	Neurology_II	OID30956	Q96BJ3	8.3612
AIF1	Oncology	OID21234	P55008	58.3612
AIF1L	Cardiometabolic_II	OID30204	Q9BQI0	97.4916
AIFM1	Oncology	OID21287	O95831	66.388
AK1	Cardiometabolic	OID20122	P00568	100
AK2	Neurology_II	OID31142	P54819	89.7993
AKAP12	Inflammation_II	OID30571	Q02952	79.4314
AKR1B1	Oncology	OID21244	P15121	99.6656
AKR1B10	Neurology_II	OID30955	O60218	5.68562
AKR1C4	Cardiometabolic	OID20062	P17516	49.8328
AKR7L	Inflammation_II	OID30488	Q8NHP1	69.0635
AKT1S1	Neurology	OID20895	Q96B36	100
AKT2	Neurology_II	OID31052	P31751	100
AKT3	Oncology	OID21197	Q9Y243	35.1171
ALCAM	Cardiometabolic	OID20273	Q13740	100
ALDH1A1	Neurology	OID21128	P00352	100
ALDH2	Oncology_II	OID31380	P05091	37.1237
ALDH3A1	Inflammation	OID20512	P30838	0.668896
ALDH5A1	Neurology_II	OID31047	P51649	41.9732
ALMS1	Oncology_II	OID31275	Q8TCU4	6.18729
ALPI	Inflammation_II	OID30497	P09923	97.3244
ALPP	Oncology	OID21383	P05187	100
AMBN	Inflammation	OID20437	Q9NP70	98.8294
AMBP	Oncology	OID21413	P02760	100
AMDHD2	Cardiometabolic_II	OID30366	Q9Y303	38.4615
AMFR	Neurology	OID20806	Q9UKV5	42.4749
AMIGO1	Neurology_II	OID30881	Q86WK6	32.6087
AMIGO2	Oncology	OID21370	Q86SJ2	100
AMN	Inflammation	OID20492	Q9BXJ7	59.8662
AMOT	Inflammation_II	OID30572	Q4VCS5	100
AMOTL2	Oncology_II	OID31351	Q9Y2J4	86.1204
AMPD3	Neurology_II	OID31139	Q01432	100
AMY1A_AMY1B_AMY1C	Inflammation_II	OID30707	P0DUB6_P0DTE7_P0DTE8	100
AMY2A	Cardiometabolic	OID20333	P04746	100
AMY2B	Cardiometabolic	OID20340	P19961	100
ANG	Cardiometabolic	OID20403	P03950	100
ANGPT1	Inflammation	OID20740	Q15389	100
ANGPT2	Oncology	OID21463	O15123	100
ANGPTL1	Cardiometabolic	OID20211	O95841	100
ANGPTL2	Inflammation	OID20726	Q9UKU9	100
ANGPTL3	Cardiometabolic	OID20407	Q9Y5C1	100
ANGPTL4	Inflammation	OID20703	Q9BY76	100
ANGPTL7	Oncology	OID21412	O43827	100
ANK2	Cardiometabolic_II	OID30161	Q01484	36.4548
ANKMY2	Inflammation_II	OID30518	Q8IV38	77.7592
ANKRA2	Oncology_II	OID31173	Q9H9E1	4.51505
ANKRD54	Oncology	OID21162	Q6NXT1	91.3043
ANP32C	Cardiometabolic_II	OID30203	O43423	11.5385
ANPEP	Cardiometabolic	OID20350	P15144	100
ANXA1	Inflammation_II	OID30617	P04083	99.3311
ANXA10	Neurology	OID20886	Q9UJ72	82.4415
ANXA11	Inflammation	OID20583	P50995	99.1639
ANXA2	Cardiometabolic_II	OID30263	P07355	100
ANXA3	Neurology	OID21036	P12429	100
ANXA4	Cardiometabolic	OID20123	P09525	99.6656
ANXA5	Neurology	OID20810	P08758	17.7258
AOC1	Inflammation	OID20452	P19801	9.0301
AOC3	Cardiometabolic	OID20389	Q16853	100
AP1G2	Oncology_II	OID31348	O75843	99.1639
AP2B1	Neurology_II	OID30949	P63010	18.8963
AP3B1	Oncology_II	OID31478	O00203	100
AP3S2	Neurology_II	OID31117	P59780	47.3244
APBB1IP	Oncology	OID21359	Q7Z5R6	100
APCS	Inflammation_II	OID30778	P02743	100
APEX1	Oncology	OID21434	P27695	100
APLP1	Cardiometabolic	OID20164	P51693	100
APOA1	Inflammation_II	OID30769	P02647	100
APOA2	Inflammation_II	OID30686	P02652	92.4749
APOA4	Inflammation_II	OID30733	P06727	100
APOB	Inflammation_II	OID30673	P04114	72.0736
APOBR	Cardiometabolic_II	OID30246	Q0VD83	100
APOC1	Inflammation_II	OID30749	P02654	100
APOD	Inflammation_II	OID30746	P05090	100
APOE	Inflammation_II	OID30727	P02649	100
APOF	Inflammation_II	OID30701	Q13790	100
APOH	Neurology	OID21072	P02749	100
APOL1	Inflammation_II	OID30708	O14791	100
APOM	Cardiometabolic	OID20374	O95445	100
APP	Neurology	OID21070	P05067	90.301
APPL2	Inflammation_II	OID30590	Q8NEU8	100
APRT	Neurology	OID20927	P07741	100
ARAF	Oncology_II	OID31260	P10398	23.4114
AREG	Oncology	OID21357	P15514	100
ARF6	Oncology_II	OID31523	P62330	98.9967
ARFIP1	Neurology_II	OID31024	P53367	94.8161
ARG1	Oncology	OID21445	P05089	100
ARG2	Oncology_II	OID31339	P78540	9.86622
ARHGAP1	Oncology	OID21202	Q07960	92.4749
ARHGAP25	Oncology	OID21255	P42331	98.495
ARHGAP30	Oncology_II	OID31336	Q7Z6I6	29.4314
ARHGAP45	Inflammation_II	OID30653	Q92619	100
ARHGAP5	Oncology_II	OID31190	Q13017	23.5786
ARHGEF1	Neurology_II	OID31133	Q92888	100
ARHGEF10	Neurology_II	OID30994	O15013	92.4749
ARHGEF12	Inflammation	OID20554	Q9NZN5	98.1605
ARHGEF5	Neurology_II	OID30871	Q12774	26.9231
ARID3A	Neurology_II	OID30861	Q99856	28.7625
ARID4B	Neurology	OID20803	Q4LE39	32.4415
ARL13B	Cardiometabolic_II	OID30166	Q3SXY8	72.7425
ARL2BP	Cardiometabolic_II	OID30121	Q9Y2Y0	99.6656
ARMCX2	Neurology_II	OID30792	Q7L311	34.7826
ARNT	Inflammation	OID20432	P27540	8.52843
ARNTL	Cardiometabolic_II	OID30168	O00327	11.3712
ARSA	Neurology	OID21138	P15289	100
ARSB	Oncology	OID21331	P15848	100
ART3	Cardiometabolic	OID20346	Q13508	100
ART5	Neurology_II	OID30828	Q96L15	6.52174
ARTN	Inflammation	OID20446	Q5T4W7	9.0301
ASAH1	Cardiometabolic_II	OID30415	Q13510	99.4983
ASAH2	Neurology	OID20996	Q9NR71	100
ASGR1	Neurology	OID20990	P07306	100
ASGR2	Inflammation_II	OID30679	P07307	100
ASPN	Cardiometabolic_II	OID30315	Q9BXN1	95.6522
ASPSCR1	Neurology_II	OID31055	Q9BZE9	100
ASRGL1	Cardiometabolic_II	OID30283	Q7L266	100
ASS1	Cardiometabolic_II	OID30170	P00966	97.6589
ATF2	Neurology	OID20798	P15336	17.2241
ATF4	Oncology_II	OID31162	P18848	7.69231
ATG16L1	Oncology_II	OID31466	Q676U5	100
ATG4A	Oncology	OID21246	Q8WYN0	99.6656
ATOX1	Oncology	OID21476	O00244	100
ATP1B1	Cardiometabolic_II	OID30124	P05026	67.2241
ATP1B2	Cardiometabolic_II	OID30118	P14415	6.02007
ATP1B3	Cardiometabolic_II	OID30065	P54709	21.7391
ATP1B4	Oncology_II	OID31230	Q9UN42	18.8963
ATP2B4	Cardiometabolic_II	OID30062	P23634	16.7224
ATP5F1D	Cardiometabolic_II	OID30079	P30049	6.35452
ATP5IF1	Inflammation	OID20760	Q9UII2	100
ATP5PO	Neurology	OID20811	P48047	22.7425
ATP6AP2	Oncology	OID21178	O75787	29.4314
ATP6V1D	Oncology	OID21341	Q9Y5K8	9.699
ATP6V1F	Neurology	OID20843	Q16864	76.7559
ATP6V1G1	Cardiometabolic_II	OID30242	O75348	83.9465
ATP6V1G2	Cardiometabolic_II	OID30167	O95670	20.5686
ATRAID	Oncology_II	OID31451	Q6UW56	100
ATRN	Inflammation_II	OID30735	O75882-2	100
ATXN10	Neurology	OID20865	Q9UBB4	62.2074
ATXN2	Neurology_II	OID30850	Q99700	66.0535
ATXN2L	Neurology_II	OID30980	Q8WWM7	22.0736
ATXN3	Neurology_II	OID31149	P54252	100
AXIN1	Inflammation	OID20582	O15169	99.1639
AXL	Cardiometabolic	OID20363	P30530	100
AZI2	Neurology_II	OID31056	Q9H6S1	62.5418
AZU1	Cardiometabolic	OID20309	P20160	100
B2M	Inflammation_II	OID30725	P61769	100
B3GAT3	Cardiometabolic_II	OID30165	O94766	1.17057
B3GNT7	Cardiometabolic_II	OID30281	Q8NFL0	100
B4GALT1	Inflammation	OID20780	P15291	100
B4GAT1	Neurology	OID21127	O43505	100
BABAM1	Inflammation_II	OID30466	Q9NWV8	3.01003
BACH1	Inflammation	OID20505	O14867	87.6254
BAG3	Neurology	OID20972	O95817	100
BAG4	Inflammation_II	OID30474	O95429	42.1405
BAG6	Cardiometabolic	OID20114	P46379	100
BAIAP2	Oncology	OID21250	Q9UQB8	94.9833
BAMBI	Oncology	OID21267	Q13145	4.01338
BANK1	Inflammation	OID20594	Q8NDB2	100
BAP18	Neurology_II	OID31150	Q8IXM2	100
BATF	Neurology_II	OID30896	Q16520	39.4649
BAX	Neurology	OID20856	Q07812	64.8829
BCAM	Neurology	OID21076	P50895	100
BCAN	Neurology	OID20998	Q96GW7	100
BCAT1	Cardiometabolic_II	OID30312	P54687	99.8328
BCAT2	Neurology_II	OID30844	O15382	10.2007
BCHE	Inflammation_II	OID30717	P06276	100
BCL2	Oncology_II	OID31454	P10415	100
BCL2L1	Neurology_II	OID31152	Q07817	95.4849
BCL2L11	Inflammation	OID20513	O43521-2	100
BCL2L15	Inflammation_II	OID30498	Q5TBC7	92.8094
BCL7A	Oncology_II	OID31218	Q4VC05	11.5385
BCL7B	Oncology_II	OID31421	Q9BQE9	9.53177
BCR	Inflammation	OID20558	P11274	99.8328
BDNF	Cardiometabolic_II	OID30373	P23560	100
BECN1	Cardiometabolic_II	OID30220	Q14457	100
BEX3	Oncology_II	OID31202	Q00994	12.8763
BGLAP	Cardiometabolic_II	OID30389	P02818	100
BGN	Oncology	OID21198	P21810	94.8161
BHLHE40	Neurology_II	OID30873	O14503	14.8829
BHMT2	Cardiometabolic_II	OID30051	Q9H2M3	12.5418
BID	Inflammation	OID20517	P55957	97.6589
BIN2	Neurology	OID21067	Q9UBW5	96.99
BIRC2	Oncology	OID21217	Q13490	14.5485
BLMH	Cardiometabolic	OID20336	Q13867	100
BLNK	Inflammation_II	OID30541	Q8WV28	92.8094
BLOC1S2	Neurology_II	OID30856	Q6QNY1	11.8729
BLOC1S3	Neurology_II	OID31106	Q6QNY0	91.9732
BLVRB	Neurology	OID21141	P30043	100
BMP10	Inflammation_II	OID30575	O95393	100
BMP4	Neurology	OID20994	P12644	100
BMP6	Cardiometabolic	OID20111	P22004	97.9933
BMPER	Inflammation_II	OID30615	Q8N8U9	100
BNIP2	Cardiometabolic_II	OID30292	Q12982	10.0334
BNIP3L	Inflammation_II	OID30525	O60238	78.2609
BOC	Cardiometabolic	OID20116	Q9BWV1	100
BOLA1	Neurology_II	OID30837	Q9Y3E2	38.2943
BOLA2_BOLA2B	Cardiometabolic_II	OID30267	Q9H3K6	100
BPIFA2	Cardiometabolic_II	OID30279	Q96DR5	100
BPIFB1	Cardiometabolic	OID20308	Q8TDL5	100
BPIFB2	Cardiometabolic_II	OID30311	Q8N4F0	99.8328
BRAP	Oncology_II	OID31506	Q7Z569	100
BRD1	Oncology_II	OID31259	O95696	20.0669
BRD2	Neurology_II	OID30826	P25440	18.5619
BRD3	Cardiometabolic_II	OID30093	Q15059	15.2174
BRDT	Cardiometabolic_II	OID30179	Q58F21	24.0803
BRK1	Neurology	OID20883	Q8WUW1	98.495
BRME1	Neurology_II	OID30847	Q0VDD7	20.7358
BRSK2	Neurology_II	OID31042	Q8IWQ3	16.0535
BSG	Inflammation	OID20626	P35613	100
BSND	Oncology_II	OID31184	Q8WZ55	11.7057
BST1	Neurology	OID21051	Q10588	100
BST2	Neurology	OID21029	Q10589	100
BTC	Oncology	OID21199	P35070	86.6221
BTD	Inflammation_II	OID30754	P43251	100
BTLA	Oncology_II	OID31237	Q7Z6A9	7.52508
BTN1A1	Oncology_II	OID31363	Q13410	65.8863
BTN2A1	Inflammation	OID20713	Q7KYR7	100
BTN3A2	Inflammation	OID20540	P78410	99.8328
BTNL10	Oncology_II	OID31196	A8MVZ5	8.69565
C19orf12	Neurology	OID20804	Q9NSK7	89.6321
C1GALT1C1	Cardiometabolic_II	OID30180	Q96EU7	59.0301
C1QA	Inflammation	OID20654	P02745	100
C1QBP	Neurology_II	OID31007	Q07021	14.8829
C1QL2	Inflammation_II	OID30515	Q7Z5L3	100
C1QTNF1	Cardiometabolic	OID20367	Q9BXJ1	100
C1QTNF5	Inflammation_II	OID30618	Q9BXJ0	100
C1QTNF6	Neurology_II	OID31049	Q9BXI9	78.5953
C1QTNF9	Inflammation_II	OID30620	P0C862	100
C1R	Inflammation_II	OID30753	P00736	100
C1RL	Inflammation_II	OID30721	Q9NZP8	100
C1S	Inflammation_II	OID30731	P09871	100
C2	Cardiometabolic	OID20410	P06681	100
C2CD2L	Neurology	OID20864	O14523	82.107
C2orf69	Neurology_II	OID30883	Q8N8R5	79.4314
C3	Inflammation_II	OID30776	P01024	100
C4BPB	Oncology	OID21481	P20851	100
C5	Inflammation_II	OID30744	P01031	97.3244
C7	Inflammation_II	OID30766	P10643	100
C7orf50	Neurology_II	OID31095	Q9BRJ6	94.1472
C8B	Inflammation_II	OID30719	P07358	98.6622
C9	Inflammation_II	OID30698	P02748	100
C9orf40	Oncology_II	OID31489	Q8IXQ3	100
CA1	Cardiometabolic	OID20409	P00915	100
CA11	Oncology	OID21195	O75493	100
CA12	Oncology	OID21344	O43570	100
CA13	Cardiometabolic	OID20225	Q8N1Q1	100
CA14	Oncology	OID21401	Q9ULX7	100
CA2	Neurology	OID21149	P00918	100
CA3	Cardiometabolic	OID20271	P07451	100
CA4	Cardiometabolic	OID20241	P22748	100
CA5A	Cardiometabolic	OID20075	P35218	99.3311
CA6	Neurology	OID21096	P23280	100
CA7	Oncology_II	OID31265	P43166	14.3813
CA8	Inflammation_II	OID30482	P35219	1.00334
CA9	Oncology	OID21417	Q16790	100
CABP2	Neurology_II	OID30916	Q9NPB3	61.0368
CACNA1C	Neurology_II	OID30840	Q13936	19.7324
CACNA1H	Cardiometabolic_II	OID30064	O95180	18.3946
CACNB1	Neurology_II	OID30820	Q02641	6.35452
CACNB3	Neurology_II	OID31039	P54284	92.8094
CACYBP	Inflammation_II	OID30649	Q9HB71	100
CADPS	Neurology_II	OID30915	Q9ULU8	21.7391
CALB1	Oncology	OID21306	P05937	100
CALB2	Neurology	OID20801	P22676	66.0535
CALCA	Neurology	OID20983	P01258	100
CALCB	Neurology_II	OID31100	P10092	100
CALCOCO1	Oncology	OID21387	Q9P1Z2	100
CALCOCO2	Cardiometabolic_II	OID30249	Q13137	100
CALY	Cardiometabolic_II	OID30144	Q9NYX4	12.0401
CAMKK1	Oncology	OID21182	Q8N5S9	43.311
CAMLG	Neurology_II	OID30952	P49069	49.3311
CAMSAP1	Neurology_II	OID31070	Q5T5Y3	99.3311
CANT1	Cardiometabolic	OID20181	Q8WVQ1	100
CAPG	Oncology	OID21431	P40121	100
CAPN3	Oncology_II	OID31384	P20807	99.4983
CAPS	Neurology_II	OID31126	Q13938	100
CARHSP1	Neurology	OID20859	Q9Y2V2	100
CASC3	Neurology_II	OID30921	O15234	20.7358
CASP1	Neurology	OID20854	P29466	38.796
CASP10	Neurology	OID20893	Q92851	47.3244
CASP2	Inflammation	OID20555	P42575	68.2274
CASP3	Cardiometabolic	OID20305	P42574	100
CASP4	Oncology_II	OID31276	P49662	79.2642
CASP7	Neurology_II	OID31135	P55210	100
CASP8	Oncology	OID21414	Q14790	100
CASP9	Inflammation_II	OID30530	P55211	2.00669
CASQ2	Cardiometabolic_II	OID30063	O14958	14.7157
CAT	Inflammation_II	OID30712	P04040	100
CBLIF	Cardiometabolic	OID20179	P27352	100
CBLN1	Neurology_II	OID30851	P23435	15.5518
CBLN4	Oncology	OID21386	Q9NTU7	100
CBS	Cardiometabolic_II	OID30200	P35520	95.4849
CBX2	Cardiometabolic_II	OID30177	Q14781	8.02676
CC2D1A	Neurology	OID20958	Q6P1N0	100
CCAR2	Neurology_II	OID31077	Q8N163	95.9866
CCDC134	Oncology_II	OID31413	Q9H6E4	27.7592
CCDC28A	Neurology_II	OID30973	Q8IWP9	17.3913
CCDC50	Neurology_II	OID31001	Q8IVM0	99.8328
CCDC80	Cardiometabolic	OID20226	Q76M96	100
CCER2	Cardiometabolic_II	OID30221	I3L3R5	100
CCL11	Inflammation	OID20668	P51671	100
CCL13	Inflammation	OID20655	Q99616	100
CCL14	Cardiometabolic	OID20401	Q16627	100
CCL15	Cardiometabolic	OID20328	Q16663	100
CCL16	Cardiometabolic	OID20334	O15467	100
CCL17	Inflammation	OID20745	Q92583	100
CCL18	Cardiometabolic	OID20395	P55774	100
CCL19	Neurology	OID21030	Q99731	100
CCL2	Neurology	OID21004	P13500	100
CCL20	Inflammation	OID20671	P78556	100
CCL21	Inflammation	OID20686	O00585	100
CCL22	Inflammation	OID20765	O00626	100
CCL23	Inflammation	OID20693	P55773	100
CCL24	Inflammation	OID20772	O00175	100
CCL25	Inflammation	OID20674	O15444	100
CCL26	Inflammation	OID20546	Q9Y258	100
CCL27	Cardiometabolic	OID20121	Q9Y4X3	100
CCL28	Inflammation	OID20569	Q9NRJ3	99.6656
CCL3	Inflammation	OID20610	P10147	100
CCL4	Inflammation	OID20695	P13236	100
CCL5	Cardiometabolic	OID20412	P13501	100
CCL7	Inflammation	OID20523	P80098	99.6656
CCL8	Oncology	OID21466	P80075	100
CCN1	Oncology	OID21368	O00622	100
CCN2	Inflammation	OID20709	P29279	100
CCN3	Cardiometabolic	OID20299	P48745	100
CCN4	Oncology	OID21444	O95388	100
CCN5	Neurology	OID21068	O76076	100
CCND2	Oncology_II	OID31316	P30279	51.8395
CCNE1	Inflammation_II	OID30456	P24864	14.0468
CCS	Neurology	OID20973	O14618	100
CCT5	Oncology	OID21200	P48643	77.592
CD101	Oncology_II	OID31480	Q93033	100
CD109	Neurology	OID21108	Q6YHK3	100
CD14	Cardiometabolic	OID20378	P08571	100
CD160	Inflammation	OID20647	O95971	100
CD163	Cardiometabolic	OID20360	Q86VB7	100
CD164	Neurology	OID21080	Q04900	100
CD164L2	Neurology_II	OID30922	Q6UWJ8	39.2977
CD177	Neurology	OID21119	Q8N6Q3	95.3177
CD1C	Oncology	OID21483	P29017	100
CD2	Cardiometabolic_II	OID30097	P06729	14.8829
CD200	Inflammation	OID20603	P41217	100
CD200R1	Inflammation	OID20595	Q8TD46	100
CD207	Oncology	OID21298	Q9UJ71	100
CD209	Cardiometabolic	OID20262	Q9NNX6	100
CD22	Inflammation	OID20637	P20273	100
CD226	Inflammation_II	OID30556	Q15762	100
CD244	Inflammation	OID20628	Q9BZW8	100
CD248	Cardiometabolic_II	OID30394	Q9HCU0	100
CD27	Oncology	OID21527	P26842	100
CD274	Neurology	OID20966	Q9NZQ7	100
CD276	Inflammation	OID20680	Q5ZPR3	100
CD28	Oncology	OID21265	P10747	100
CD2AP	Cardiometabolic	OID20177	Q9Y5K6	100
CD300A	Inflammation_II	OID30576	Q9UGN4	100
CD300C	Neurology	OID21010	Q08708	100
CD300E	Oncology	OID21418	Q496F6	100
CD300LF	Oncology	OID21469	Q8TDQ1	100
CD300LG	Neurology	OID21130	Q6UXG3	100
CD302	Oncology	OID21328	Q8IX05	100
CD33	Oncology	OID21472	P20138	95.9866
CD34	Neurology	OID21025	P28906	100
CD36	Inflammation_II	OID30485	P16671	91.6388
CD38	Oncology	OID21316	P28907	100
CD3D	Neurology_II	OID30827	P04234	8.69565
CD3E	Oncology_II	OID31302	P07766	9.36455
CD3G	Inflammation_II	OID30448	P09693	52.5084
CD4	Inflammation	OID20584	P01730	100
CD40	Inflammation	OID20724	P25942	100
CD40LG	Inflammation	OID20616	P29965	100
CD46	Cardiometabolic	OID20380	P15529	100
CD48	Inflammation	OID20692	P09326	100
CD5	Oncology	OID21449	P06127	100
CD55	Cardiometabolic	OID20377	P08174	100
CD58	Cardiometabolic_II	OID30371	P19256	100
CD58	Inflammation	OID20716	P19256	100
CD59	Cardiometabolic	OID20339	P13987	100
CD5L	Inflammation_II	OID30775	O43866	100
CD6	Inflammation	OID20649	P30203	100
CD63	Neurology	OID20988	P08962	100
CD69	Cardiometabolic	OID20206	Q07108	100
CD7	Inflammation_II	OID30543	P09564	100
CD70	Inflammation	OID20599	P32970	100
CD72	Inflammation_II	OID30641	P21854	100
CD74	Neurology	OID21040	P04233	100
CD79B	Inflammation	OID20635	P40259	100
CD80	Cardiometabolic_II	OID30291	P33681	100
CD82	Oncology_II	OID31256	P27701	25.9197
CD83	Inflammation	OID20565	Q01151	100
CD84	Inflammation	OID20607	Q9UIB8	100
CD86	Oncology_II	OID31500	P42081	100
CD8A	Neurology	OID21018	P01732	100
CD93	Cardiometabolic	OID20397	Q9NPY3	100
CD99	Neurology	OID21110	P14209	100
CD99L2	Neurology	OID21122	Q8TCZ2	100
CDA	Cardiometabolic_II	OID30345	P32320	100
CDAN1	Neurology_II	OID31076	Q8IWY9	7.52508
CDC123	Oncology_II	OID31242	O75794	23.7458
CDC25A	Oncology_II	OID31189	P30304	8.02676
CDC26	Oncology_II	OID31508	Q8NHZ8	100
CDC27	Oncology	OID21238	P30260	63.5452
CDC37	Oncology	OID21470	Q16543	97.8261
CDC42BPB	Oncology_II	OID31485	Q9Y5S2	96.8227
CDCP1	Neurology	OID20940	Q9H5V8	100
CDH1	Cardiometabolic	OID20353	P12830	100
CDH15	Neurology	OID21005	P55291	100
CDH17	Cardiometabolic	OID20134	Q12864	100
CDH2	Cardiometabolic	OID20170	P19022	100
CDH22	Oncology_II	OID31332	Q9UJ99	22.7425
CDH23	Neurology_II	OID31074	Q9H251	60.5351
CDH3	Neurology	OID21008	P22223	100
CDH4	Neurology_II	OID30875	P55283	26.5886
CDH5	Cardiometabolic	OID20243	P33151	100
CDH6	Cardiometabolic	OID20157	P55285	100
CDHR1	Neurology	OID20808	Q96JP9	96.1538
CDHR2	Oncology	OID21282	Q9BYE9	100
CDHR5	Cardiometabolic	OID20193	Q9HBB8	100
CDK1	Oncology_II	OID31164	P06493	32.4415
CDK5RAP3	Neurology_II	OID30985	Q96JB5	23.913
CDKL5	Neurology_II	OID30796	O76039	14.0468
CDKN1A	Oncology	OID21319	P38936	92.8094
CDKN2D	Oncology	OID21295	P55273	100
CDNF	Oncology	OID21318	Q49AH0	100
CDON	Inflammation	OID20754	Q4KMG0	100
CDSN	Inflammation	OID20667	Q15517	100
CEACAM1	Oncology	OID21528	P13688	100
CEACAM16	Oncology_II	OID31495	Q2WEN9	100
CEACAM18	Oncology_II	OID31251	A8MTB9	39.2977
CEACAM19	Oncology_II	OID31443	Q7Z692	100
CEACAM20	Oncology_II	OID31308	Q6UY09	52.1739
CEACAM21	Inflammation	OID20548	Q3KPI0	100
CEACAM3	Oncology	OID21245	P40198	12.0401
CEACAM5	Oncology	OID21171	P06731	81.9398
CEACAM6	Cardiometabolic_II	OID30362	P40199	99.8328
CEACAM8	Cardiometabolic	OID20102	P31997	100
CEBPA	Inflammation_II	OID30458	P49715	11.5385
CEBPB	Cardiometabolic	OID20052	P17676	74.5819
CELA2A	Cardiometabolic_II	OID30411	P08217	100
CELA3A	Cardiometabolic	OID20298	P09093	100
CELSR2	Inflammation_II	OID30593	Q9HCU4	100
CEMIP2	Inflammation_II	OID30499	Q9UHN6	97.4916
CEND1	Neurology_II	OID30821	Q8N111	62.8763
CENPF	Oncology_II	OID31329	P49454	54.0134
CENPJ	Oncology_II	OID31314	Q9HC77	18.7291
CEP112	Cardiometabolic_II	OID30115	Q8N8E3	48.3278
CEP152	Oncology_II	OID31249	O94986	33.7793
CEP164	Inflammation	OID20441	Q9UPV0	9.36455
CEP170	Cardiometabolic_II	OID30240	Q5SW79	100
CEP20	Oncology	OID21209	Q96NB1	89.9666
CEP290	Oncology_II	OID31287	O15078	10.7023
CEP350	Oncology_II	OID31247	Q5VT06	4.01338
CEP43	Cardiometabolic	OID20084	O95684	47.6589
CEP85	Oncology	OID21241	Q6P2H3	52.5084
CERT	Neurology	OID20857	Q9Y5P4	43.9799
CES1	Cardiometabolic	OID20244	P23141	100
CES2	Oncology	OID21366	O00748	100
CES3	Oncology	OID21340	Q6UWW8	97.8261
CETN2	Neurology	OID20836	P41208	43.311
CETN3	Oncology_II	OID31525	O15182	99.8328
CFB	Inflammation_II	OID30755	P00751	100
CFC1	Oncology	OID21261	P0CG37	99.4983
CFD	Inflammation_II	OID30738	P00746	100
CFH	Inflammation_II	OID30790	P08603	100
CFHR2	Inflammation_II	OID30720	P36980	99.6656
CFHR4	Inflammation_II	OID30758	Q92496	99.8328
CFHR5	Inflammation_II	OID30716	Q9BXR6	100
CFI	Inflammation_II	OID30772	P05156	100
CFP	Inflammation_II	OID30784	P27918	100
CGA	Neurology	OID21069	P01215	100
CGB3_CGB5_CGB8	Inflammation_II	OID30671	P0DN86	2.84281
CGN	Neurology_II	OID30894	Q9P2M7	62.709
CGREF1	Cardiometabolic	OID20152	Q99674	100
CHAC2	Oncology	OID21230	Q8WUX2	93.1438
CHAD	Inflammation_II	OID30660	O15335	100
CHCHD10	Neurology_II	OID31116	Q8WYQ3	100
CHCHD6	Oncology_II	OID31426	Q9BRQ6	99.8328
CHEK2	Cardiometabolic	OID20054	O96017	7.85953
CHGA	Cardiometabolic_II	OID30403	P10645	100
CHGB	Neurology	OID21038	P05060	100
CHI3L1	Cardiometabolic	OID20399	P36222	100
CHIT1	Cardiometabolic	OID20312	Q13231	99.1639
CHL1	Cardiometabolic	OID20366	O00533	100
CHM	Neurology_II	OID30972	P24386	40.301
CHMP1A	Neurology	OID20930	Q9HD42	99.3311
CHMP6	Cardiometabolic_II	OID30327	Q96FZ7	100
CHP1	Neurology_II	OID30869	Q99653	19.398
CHRDL1	Inflammation	OID20771	Q9BU40	100
CHRDL2	Cardiometabolic	OID20223	Q6WN34	100
CHRM1	Neurology_II	OID30930	P11229	15.8863
CIAPIN1	Oncology	OID21501	Q6FI81	100
CILP	Cardiometabolic_II	OID30399	O75339	100
CINP	Oncology_II	OID31328	Q9BW66	24.9164
CIRBP	Oncology_II	OID31503	Q14011	99.8328
CIT	Neurology_II	OID30970	O14578	83.612
CKAP4	Inflammation	OID20617	Q07065	100
CKB	Cardiometabolic_II	OID30400	P12277	100
CKMT1A_CKMT1B	Inflammation	OID20721	P12532	100
CLASP1	Oncology_II	OID31192	Q7Z460	29.5987
CLC	Cardiometabolic	OID20126	Q05315	97.6589
CLEC10A	Neurology	OID20928	Q8IUN9	100
CLEC11A	Neurology	OID21112	Q9Y240	100
CLEC12A	Inflammation_II	OID30552	Q5QGZ9	89.4649
CLEC14A	Neurology	OID21090	Q86T13	100
CLEC1A	Cardiometabolic	OID20099	Q8NC01	100
CLEC1B	Neurology	OID21061	Q9P126	100
CLEC2L	Neurology_II	OID30884	P0C7M8	30.9365
CLEC3B	Inflammation_II	OID30756	P05452	100
CLEC4A	Inflammation	OID20573	Q9UMR7	100
CLEC4C	Inflammation	OID20547	Q8WTT0	100
CLEC4D	Inflammation	OID20609	Q8WXI8	100
CLEC4G	Inflammation	OID20590	Q6UXB4	100
CLEC4M	Cardiometabolic_II	OID30405	Q9H2X3	100
CLEC5A	Cardiometabolic	OID20165	Q9NY25	100
CLEC6A	Oncology	OID21228	Q6EIG7	99.6656
CLEC7A	Inflammation	OID20636	Q9BXN2	98.8294
CLGN	Neurology_II	OID30957	O14967	79.4314
CLIC5	Neurology_II	OID30890	Q9NZA1	20.7358
CLINT1	Oncology_II	OID31182	Q14677	11.204
CLIP2	Inflammation	OID20559	Q9UDT6	98.9967
CLMP	Oncology	OID21419	Q9H6B4	100
CLNS1A	Neurology_II	OID30929	P54105	44.8161
CLPP	Neurology	OID20910	Q16740	97.8261
CLPS	Neurology	OID21156	P04118	100
CLSPN	Neurology	OID20831	Q9HAW4	1.83946
CLSTN1	Neurology	OID20874	O94985	77.4247
CLSTN2	Inflammation	OID20664	Q9H4D0	100
CLSTN3	Neurology_II	OID31092	Q9BQT9	100
CLTA	Cardiometabolic	OID20118	P09496	46.6555
CLU	Inflammation_II	OID30732	P10909	100
CLUL1	Cardiometabolic	OID20198	Q15846	100
CMC1	Cardiometabolic_II	OID30360	Q7Z7K0	96.1538
CMIP	Oncology_II	OID31406	Q8IY22	44.9833
CNDP1	Cardiometabolic	OID20347	Q96KN2	100
CNGB3	Neurology_II	OID30805	Q9NQW8	71.9064
CNP	Cardiometabolic_II	OID30285	P09543	100
CNPY2	Cardiometabolic	OID20069	Q9Y2B0	36.9565
CNPY4	Oncology	OID21317	Q8N129	100
CNST	Cardiometabolic	OID20127	Q6PJW8	96.8227
CNTF	Neurology_II	OID30807	P26441	12.709
CNTN1	Cardiometabolic	OID20307	Q12860	100
CNTN2	Oncology	OID21426	Q02246	100
CNTN3	Neurology	OID21092	Q9P232	100
CNTN4	Neurology	OID21117	Q8IWV2	100
CNTN5	Neurology	OID21006	O94779	100
CNTNAP2	Inflammation	OID20556	Q9UHC6	100
CNTNAP4	Neurology_II	OID30911	Q9C0A0	39.4649
COCH	Cardiometabolic_II	OID30305	O43405	100
COL15A1	Cardiometabolic_II	OID30396	P39059	100
COL18A1	Cardiometabolic	OID20332	P39060	100
COL1A1	Cardiometabolic	OID20335	P02452	100
COL24A1	Oncology_II	OID31464	Q17RW2	99.6656
COL28A1	Neurology_II	OID30969	Q2UY09	91.9732
COL2A1	Cardiometabolic_II	OID30286	P02458	100
COL3A1	Cardiometabolic_II	OID30379	P02461	100
COL4A1	Cardiometabolic	OID20208	P02462	100
COL4A4	Oncology_II	OID31333	P53420	11.5385
COL5A1	Inflammation_II	OID30587	P20908	100
COL6A3	Cardiometabolic	OID20292	P12111	100
COL9A1	Inflammation	OID20550	P20849	99.1639
COL9A2	Oncology_II	OID31255	Q14055	20.2341
COLEC12	Inflammation	OID20738	Q5KU26	100
COMMD1	Cardiometabolic_II	OID30222	Q8N668	100
COMMD9	Oncology_II	OID31390	Q9P000	87.291
COMP	Cardiometabolic	OID20405	P49747	100
COMT	Cardiometabolic	OID20086	P21964	100
COPB2	Cardiometabolic_II	OID30173	P35606	22.0736
COPE	Neurology	OID20797	O14579	10.7023
COQ7	Cardiometabolic_II	OID30217	Q99807	99.8328
CORO1A	Cardiometabolic	OID20286	P31146	99.6656
CORO6	Neurology_II	OID30870	Q6QEF8	38.1271
COX5B	Oncology	OID21297	P10606	85.1171
COX6B1	Cardiometabolic_II	OID30317	P14854	14.7157
CPA1	Cardiometabolic	OID20280	P15085	100
CPA2	Neurology	OID21060	P48052	100
CPA4	Inflammation_II	OID30606	Q9UI42	100
CPB1	Cardiometabolic	OID20289	P15086	100
CPB2	Inflammation_II	OID30734	Q96IY4	100
CPE	Oncology	OID21392	P16870	100
CPLX2	Oncology_II	OID31186	Q6PUV4	3.17726
CPM	Neurology	OID21054	P14384	100
CPOX	Inflammation_II	OID30495	P36551	90.1338
CPPED1	Neurology	OID21053	Q9BRF8	100
CPQ	Cardiometabolic_II	OID30406	Q9Y646	100
CPTP	Cardiometabolic_II	OID30106	Q5TA50	32.2742
CPVL	Oncology	OID21435	Q9H3G5	100
CPXM1	Oncology	OID21479	Q96SM3	100
CPXM2	Cardiometabolic_II	OID30322	Q8N436	99.8328
CR1	Inflammation_II	OID30697	P17927	100
CR2	Cardiometabolic	OID20393	P20023	100
CRACR2A	Oncology	OID21249	Q9BSW2	90.9699
CRADD	Neurology	OID20923	P78560	100
CREB3	Oncology_II	OID31188	O43889	15.0502
CREBZF	Oncology_II	OID31206	Q9NS37	4.51505
CREG1	Oncology	OID21515	O75629	100
CRELD1	Inflammation_II	OID30619	Q96HD1	100
CRELD2	Inflammation	OID20751	Q6UXH1	100
CRH	Oncology	OID21257	P06850	97.8261
CRHBP	Inflammation	OID20747	P24387	100
CRHR1	Cardiometabolic	OID20055	P34998	43.4783
CRIM1	Inflammation	OID20701	Q9NZV1	100
CRIP2	Neurology	OID20901	P52943	100
CRISP2	Oncology	OID21456	P16562	100
CRISP3	Inflammation_II	OID30715	P54108	100
CRKL	Inflammation	OID20742	P46109	100
CRLF1	Inflammation	OID20699	O75462	100
CRNN	Oncology	OID21427	Q9UBG3	100
CRTAC1	Cardiometabolic	OID20279	Q9NQ79	100
CRTAM	Neurology	OID20914	O95727	100
CRTAP	Neurology_II	OID30902	O75718	20.5686
CRX	Cardiometabolic	OID20070	O43186	22.5753
CRYBB1	Cardiometabolic_II	OID30319	P53674	100
CRYBB2	Neurology_II	OID31081	P43320	100
CRYGD	Neurology_II	OID31144	P07320	100
CRYM	Neurology_II	OID30815	Q14894	53.6789
CRYZL1	Cardiometabolic_II	OID30272	O95825	100
CSDE1	Cardiometabolic_II	OID30183	O75534	49.8328
CSF1	Inflammation	OID20719	P09603	100
CSF1R	Inflammation_II	OID30681	P07333	100
CSF2	Cardiometabolic_II	OID30072	P04141	74.2475
CSF2RA	Neurology	OID20915	P15509	100
CSF2RB	Inflammation_II	OID30553	P32927	100
CSF3	Inflammation	OID20491	P09919	90.1338
CSF3R	Inflammation_II	OID30527	Q99062	100
CSH1	Inflammation_II	OID30667	P0DML2	4.68227
CSNK1D	Inflammation_II	OID30492	P48730	12.709
CSNK2A1	Neurology_II	OID31053	P68400	39.7993
CSPG4	Cardiometabolic_II	OID30397	Q6UVK1	100
CSPG5	Neurology_II	OID30843	O95196	29.2642
CSRP3	Cardiometabolic_II	OID30176	P50461	84.1137
CST1	Inflammation_II	OID30581	P01037	98.9967
CST3	Cardiometabolic	OID20400	P01034	100
CST5	Neurology	OID20995	P28325	100
CST6	Cardiometabolic	OID20293	Q15828	100
CST7	Inflammation	OID20704	O76096	100
CSTB	Cardiometabolic	OID20294	P04080	100
CTAG1A_CTAG1B	Oncology_II	OID31299	P78358	10.0334
CTBS	Inflammation_II	OID30710	Q01459	100
CTF1	Cardiometabolic	OID20061	Q16619	62.3746
CTHRC1	Cardiometabolic_II	OID30393	Q96CG8	100
CTLA4	Cardiometabolic_II	OID30363	P16410	12.3746
CTNNA1	Neurology_II	OID30800	P35221	14.214
CTRB1	Neurology	OID21150	P17538	100
CTRC	Inflammation	OID20752	Q99895	100
CTRL	Neurology_II	OID31157	P40313	100
CTSB	Cardiometabolic	OID20276	P07858	100
CTSC	Inflammation	OID20679	P53634	100
CTSD	Cardiometabolic	OID20358	P07339	100
CTSE	Inflammation_II	OID30628	P14091	100
CTSF	Oncology	OID21500	Q9UBX1	100
CTSH	Cardiometabolic	OID20113	P09668	97.1572
CTSL	Cardiometabolic	OID20228	P07711	100
CTSO	Inflammation	OID20660	P43234	100
CTSS	Neurology	OID21056	P25774	100
CTSV	Oncology	OID21405	O60911	100
CTSZ	Cardiometabolic	OID20365	Q9UBR2	100
CUZD1	Neurology_II	OID30914	Q86UP6	34.4482
CWC15	Oncology_II	OID31479	Q9P013	99.8328
CX3CL1	Neurology	OID20976	P78423	100
CXADR	Inflammation	OID20561	P78310	100
CXCL1	Inflammation	OID20762	P09341	100
CXCL10	Inflammation	OID20697	P02778	100
CXCL11	Neurology	OID21042	O14625	100
CXCL12	Inflammation	OID20464	P48061	100
CXCL13	Neurology	OID21024	O43927	100
CXCL14	Inflammation	OID20458	O95715	74.9164
CXCL16	Cardiometabolic	OID20282	Q9H2A7	100
CXCL17	Inflammation	OID20622	Q6UXB2	100
CXCL3	Inflammation	OID20788	P19876	100
CXCL5	Cardiometabolic	OID20207	P42830	100
CXCL6	Inflammation	OID20613	P80162	100
CXCL8	Cardiometabolic	OID20153	P10145	100
CXCL8	Inflammation	OID20631	P10145	100
CXCL8	Neurology	OID20997	P10145	100
CXCL8	Oncology	OID21430	P10145	100
CXCL9	Inflammation	OID20675	Q07325	100
CYB5A	Oncology_II	OID31171	P00167	28.5953
CYB5R2	Oncology_II	OID31512	Q6BCY4	100
CYP24A1	Cardiometabolic_II	OID30091	Q07973	17.893
CYTH3	Oncology_II	OID31208	O43739	22.2408
CYTL1	Cardiometabolic_II	OID30374	Q9NRR1	100
DAAM1	Inflammation_II	OID30664	Q9Y4D1	98.6622
DAB2	Oncology	OID21428	P98082	100
DAG1	Inflammation	OID20774	Q14118	100
DAND5	Inflammation_II	OID30420	Q8N907	23.913
DAPK2	Inflammation_II	OID30505	Q9UIK4	85.4515
DAPP1	Inflammation	OID20524	Q9UN19	99.8328
DARS1	Neurology	OID20903	P14868	100
DBH	Inflammation_II	OID30703	P09172	100
DBI	Neurology	OID21143	P07108	100
DBN1	Inflammation_II	OID30549	Q16643	100
DBNL	Inflammation	OID20681	Q9UJU6	100
DCBLD2	Oncology	OID21474	Q96PD2	100
DCC	Neurology_II	OID30953	P43146	21.0702
DCDC2C	Oncology_II	OID31235	A8MYV0	33.612
DCLRE1C	Oncology_II	OID31240	Q96SD1	23.4114
DCN	Cardiometabolic	OID20106	P07585	100
DCTD	Inflammation_II	OID30657	P32321	100
DCTN1	Oncology	OID21399	Q14203	100
DCTN2	Oncology	OID21334	Q13561	99.4983
DCTN6	Neurology	OID20879	O00399	49.8328
DCTPP1	Cardiometabolic	OID20148	Q9H773	100
DCUN1D1	Neurology_II	OID30830	Q96GG9	9.86622
DCUN1D2	Oncology_II	OID31231	Q6PH85	25.2508
DCXR	Oncology	OID21480	Q7Z4W1	100
DDA1	Cardiometabolic_II	OID30126	Q9BW61	23.913
DDAH1	Oncology	OID21299	O94760	100
DDC	Cardiometabolic	OID20215	P20711	100
DDHD2	Neurology_II	OID31043	O94830	100
DDI2	Inflammation_II	OID30602	Q5TDH0	100
DDR1	Neurology	OID21009	Q08345	100
DDT	Cardiometabolic_II	OID30372	P30046	100
DDX1	Oncology_II	OID31518	Q92499	17.5585
DDX25	Neurology_II	OID30892	Q9UHL0	9.0301
DDX39A	Inflammation_II	OID30494	O00148	7.02341
DDX4	Inflammation_II	OID30431	Q9NQI0	6.68896
DDX53	Neurology_II	OID30944	Q86TM3	18.3946
DDX58	Oncology	OID21226	O95786	99.1639
DECR1	Inflammation	OID20579	Q16698	100
DEFA1_DEFA1B	Cardiometabolic	OID20344	P59665	100
DEFB103A_DEFB103B	Inflammation_II	OID30534	P81534	16.8896
DEFB104A_DEFB104B	Neurology_II	OID30849	Q8WTQ1	23.5786
DEFB116	Neurology_II	OID30823	Q30KQ4	13.2107
DEFB118	Neurology_II	OID30858	Q96PH6	12.5418
DEFB4A_DEFB4B	Oncology	OID21373	O15263	99.3311
DENND2B	Cardiometabolic_II	OID30050	P78524	22.9097
DENR	Inflammation_II	OID30493	O43583	76.2542
DFFA	Inflammation	OID20620	O00273	100
DGCR6	Neurology_II	OID30859	Q14129	56.689
DGKA	Inflammation_II	OID30546	P23743	39.9666
DGKZ	Inflammation	OID20466	Q13574	0.668896
DHODH	Cardiometabolic_II	OID30137	Q02127	6.68896
DHPS	Oncology_II	OID31357	P49366	71.0702
DHRS4L2	Neurology_II	OID31072	Q6PKH6	38.796
DIABLO	Cardiometabolic	OID20184	Q9NR28	98.6622
DIPK1C	Neurology_II	OID30932	Q0P6D2	27.9264
DIPK2B	Inflammation_II	OID30582	Q9H7Y0	100
DKK1	Neurology	OID21066	O94907	100
DKK3	Cardiometabolic	OID20264	Q9UBP4	100
DKK4	Neurology	OID20934	Q9UBT3	100
DKKL1	Oncology	OID21313	Q9UK85	99.4983
DLG4	Neurology_II	OID31071	P78352	76.2542
DLGAP5	Neurology_II	OID30976	Q15398	34.6154
DLK1	Cardiometabolic	OID20295	P80370	100
DLL1	Oncology	OID21525	O00548	100
DLL4	Cardiometabolic_II	OID30255	Q9NR61	40.301
DMD	Cardiometabolic_II	OID30223	P11532	99.8328
DMP1	Cardiometabolic_II	OID30213	Q13316	100
DNAJA1	Oncology_II	OID31204	P31689	6.02007
DNAJA2	Inflammation	OID20627	O60884	100
DNAJA4	Neurology_II	OID31130	Q8WW22	100
DNAJB1	Oncology	OID21363	P25685	100
DNAJB14	Oncology_II	OID31434	Q8TBM8	100
DNAJB2	Inflammation_II	OID30661	P25686	100
DNAJB6	Inflammation_II	OID30613	O75190	100
DNAJB8	Cardiometabolic	OID20093	Q8NHS0	27.592
DNAJC21	Neurology_II	OID31104	Q5F1R6	61.0368
DNAJC6	Cardiometabolic_II	OID30247	O75061	100
DNAJC9	Oncology_II	OID31472	Q8WXX5	100
DNER	Inflammation	OID20712	Q8NFT8	100
DNLZ	Neurology_II	OID30822	Q5SXM8	52.8428
DNM1	Oncology_II	OID31458	Q05193	100
DNM3	Neurology_II	OID31000	Q9UQ16	99.6656
DNMBP	Neurology	OID20956	Q6XZF7	100
DNPEP	Neurology_II	OID31118	Q9ULA0	100
DNPH1	Inflammation	OID20744	O43598	100
DOC2B	Neurology_II	OID30927	Q14184	29.097
DOCK9	Neurology_II	OID30836	Q9BZ29	25.2508
DOK1	Neurology_II	OID31111	Q99704	99.4983
DOK2	Cardiometabolic	OID20138	O60496	99.8328
DPEP1	Neurology	OID20897	P16444	100
DPEP2	Oncology	OID21305	Q9H4A9	100
DPP10	Inflammation	OID20527	Q8N608	100
DPP4	Cardiometabolic	OID20406	P27487	100
DPP6	Oncology	OID21354	P42658	100
DPP7	Cardiometabolic	OID20142	Q9UHL4	96.3211
DPT	Cardiometabolic	OID20278	Q07507	100
DPY30	Oncology	OID21410	Q9C005	100
DRAXIN	Neurology	OID20917	Q8NBI3	100
DRG2	Oncology	OID21335	P55039	82.4415
DSC2	Neurology	OID21079	Q02487	100
DSCAM	Neurology_II	OID30993	O60469	100
DSG2	Neurology	OID21113	Q14126	100
DSG3	Oncology	OID21460	P32926	100
DSG4	Oncology	OID21325	Q86SJ6	100
DTD1	Inflammation_II	OID30580	Q8TEA8	100
DTNB	Oncology_II	OID31395	O60941	100
DTX2	Neurology_II	OID30882	Q86UW9	57.3579
DTX3	Oncology	OID21349	Q8N9I9	100
DTYMK	Cardiometabolic_II	OID30308	P23919	100
DUOX2	Cardiometabolic	OID20059	Q9NRD8	20.4013
DUSP13	Oncology_II	OID31394	Q6B8I1	98.3278
DUSP29	Neurology_II	OID30935	Q68J44	67.893
DUSP3	Neurology	OID20827	P51452	48.495
DUT	Oncology_II	OID31457	P33316	100
DXO	Neurology_II	OID31080	O77932	100
DYNC1H1	Oncology_II	OID31341	Q14204	18.3946
DYNLT1	Neurology_II	OID30925	P63172	91.1371
DYNLT3	Oncology_II	OID31415	P51808	53.8462
EBAG9	Neurology	OID20918	O00559	100
EBI3_IL27	Oncology	OID21389	Q14213_Q8NEV9	100
ECE1	Neurology	OID20891	P42892	99.4983
ECHDC3	Cardiometabolic_II	OID30293	Q96DC8	99.3311
ECHS1	Cardiometabolic_II	OID30239	P30084	99.3311
ECI2	Cardiometabolic_II	OID30142	O75521	55.5184
ECM1	Inflammation_II	OID30736	Q16610	100
ECSCR	Neurology_II	OID30831	Q19T08	13.5452
EDA2R	Oncology	OID21451	Q9HAV5	100
EDAR	Inflammation	OID20525	Q9UNE0	100
EDDM3B	Oncology_II	OID31365	P56851	50
EDEM2	Cardiometabolic_II	OID30136	Q9BV94	15.7191
EDF1	Neurology_II	OID31010	O60869	91.6388
EDIL3	Cardiometabolic	OID20081	O43854	100
EDN1	Cardiometabolic_II	OID30224	P05305	100
EDNRB	Inflammation_II	OID30421	P24530	15.8863
EEF1D	Cardiometabolic_II	OID30335	P29692	100
EFCAB14	Oncology_II	OID31460	O75071	100
EFCAB2	Oncology_II	OID31313	Q5VUJ9	28.0936
EFEMP1	Cardiometabolic	OID20414	Q12805	100
EFHD1	Neurology_II	OID31044	Q9BUP0	100
EFNA1	Neurology	OID21125	P20827	100
EFNA4	Neurology	OID20935	P52798	100
EFNB2	Neurology_II	OID30954	P52799	47.3244
EGF	Inflammation	OID20698	P01133	100
EGFL7	Oncology	OID21252	Q9UHF1	100
EGFLAM	Oncology_II	OID31496	Q63HQ2	100
EGFR	Cardiometabolic	OID20319	P00533	100
EGLN1	Inflammation	OID20572	Q9GZT9	100
EHBP1	Cardiometabolic_II	OID30302	Q8NDI1	99.6656
EHD3	Cardiometabolic_II	OID30229	Q9NZN3	100
EIF1AX	Neurology_II	OID31125	P47813	18.3946
EIF2AK2	Oncology_II	OID31442	P19525	99.3311
EIF2AK3	Cardiometabolic_II	OID30060	Q9NZJ5	19.2308
EIF2S2	Cardiometabolic_II	OID30270	P20042	29.4314
EIF4B	Neurology	OID21000	P23588	100
EIF4E	Inflammation_II	OID30557	P06730	97.3244
EIF4EBP1	Cardiometabolic	OID20162	Q13541	100
EIF4G1	Inflammation	OID20625	Q04637	100
EIF4G3	Neurology_II	OID31022	O43432	19.5652
EIF5	Cardiometabolic_II	OID30156	P55010	36.9565
EIF5A	Inflammation	OID20423	P63241	31.2709
ELAC1	Neurology_II	OID31029	Q9H777	99.8328
ELAVL4	Neurology_II	OID30854	P26378	41.9732
ELN	Cardiometabolic_II	OID30301	P15502	100
ELOA	Oncology	OID21337	Q14241	100
ELOB	Cardiometabolic_II	OID30127	Q15370	26.2542
ENAH	Inflammation	OID20497	Q8N8S7	99.4983
ENDOU	Oncology_II	OID31498	P21128	100
ENG	Cardiometabolic	OID20287	P17813	100
ENO1	Neurology	OID21037	P06733	100
ENO2	Neurology	OID21046	P09104	100
ENO3	Cardiometabolic_II	OID30209	P13929	96.99
ENOPH1	Oncology_II	OID31349	Q9UHY7	15.3846
ENOX2	Cardiometabolic_II	OID30152	Q16206	12.2074
ENPEP	Cardiometabolic_II	OID30135	Q07075	18.3946
ENPP2	Cardiometabolic	OID20288	Q13822	100
ENPP5	Inflammation	OID20736	Q9UJA9	100
ENPP6	Cardiometabolic_II	OID30273	Q6UWR7	100
ENPP7	Inflammation	OID20689	Q6UWV6	100
ENSA	Oncology_II	OID31355	O43768	19.7324
ENTPD2	Oncology	OID21260	Q9Y5L3	99.4983
ENTPD5	Cardiometabolic	OID20104	O75356	100
ENTPD6	Cardiometabolic	OID20100	O75354	100
ENTR1	Cardiometabolic_II	OID30231	Q96C92	100
EP300	Inflammation_II	OID30438	Q09472	6.85619
EPB41L5	Neurology_II	OID30886	Q9HCM4	62.8763
EPCAM	Inflammation	OID20743	P16422	100
EPGN	Oncology_II	OID31373	Q6UW88	28.0936
EPHA1	Inflammation	OID20677	P21709	100
EPHA10	Neurology	OID20840	Q5JZY3	26.9231
EPHA2	Oncology	OID21342	P29317	100
EPHA4	Inflammation_II	OID30622	P54764	100
EPHB4	Cardiometabolic	OID20242	P54760	100
EPHB6	Neurology	OID20982	O15197	100
EPHX2	Cardiometabolic	OID20119	P34913	32.6087
EPN1	Oncology_II	OID31252	Q9Y6I3	21.5719
EPO	Inflammation	OID20522	P01588	97.4916
EPPK1	Cardiometabolic_II	OID30250	P58107	100
EPS8L2	Oncology	OID21397	Q9H6S3	100
ERBB2	Oncology	OID21520	P04626	100
ERBB3	Inflammation	OID20705	P21860	100
ERBB4	Oncology	OID21510	Q15303	100
ERBIN	Oncology	OID21323	Q96RT1	99.3311
ERC2	Neurology_II	OID30880	O15083	62.3746
ERCC1	Oncology_II	OID31223	P07992	11.8729
EREG	Neurology	OID20905	O14944	99.8328
ERI1	Oncology_II	OID31317	Q8IV48	37.291
ERMAP	Inflammation_II	OID30539	Q96PL5	100
ERN1	Oncology_II	OID31391	O75460	100
ERP29	Inflammation_II	OID30578	P30040	100
ERP44	Oncology	OID21338	Q9BS26	100
ERVV-1	Cardiometabolic_II	OID30094	B6SEH8	26.087
ESAM	Cardiometabolic	OID20270	Q96AP7	100
ESM1	Inflammation	OID20758	Q9NQ30	100
ESPL1	Oncology_II	OID31176	Q14674	23.913
ESR1	Inflammation_II	OID30434	P03372	6.85619
ESYT2	Neurology_II	OID31134	A0FGR8	99.8328
EVI2B	Oncology_II	OID31227	P34910	18.0602
EVI5	Inflammation_II	OID30519	O60447	84.4482
EVPL	Oncology_II	OID31309	Q92817	38.6288
EXOSC10	Cardiometabolic_II	OID30083	Q01780	20.5686
EXTL1	Cardiometabolic_II	OID30114	Q92935	46.6555
EZR	Neurology	OID21017	P15311	100
F10	Inflammation_II	OID30684	P00742	100
F11	Inflammation_II	OID30773	P03951	100
F11R	Neurology	OID21151	Q9Y624	100
F12	Inflammation_II	OID30739	P00748	100
F13B	Inflammation_II	OID30781	P05160	100
F2	Inflammation_II	OID30723	P00734	99.8328
F2R	Inflammation	OID20691	P25116	100
F3	Oncology	OID21440	P13726	100
F7	Cardiometabolic	OID20372	P08709	100
F9	Cardiometabolic	OID20349	P00740	100
FABP1	Inflammation	OID20778	P07148	100
FABP2	Cardiometabolic	OID20200	P12104	100
FABP3	Cardiometabolic_II	OID30351	P05413	100
FABP4	Cardiometabolic	OID20245	P15090	100
FABP5	Neurology	OID21043	Q01469	100
FABP6	Cardiometabolic	OID20076	P51161	92.9766
FABP9	Inflammation	OID20501	Q0Z7S8	100
FADD	Cardiometabolic	OID20151	Q13158	99.6656
FAM13A	Oncology_II	OID31463	O94988	100
FAM171A2	Neurology_II	OID31005	A8MVW0	88.2943
FAM171B	Oncology_II	OID31338	Q6P995	99.3311
FAM172A	Cardiometabolic_II	OID30248	Q8WUF8	100
FAM20A	Cardiometabolic_II	OID30348	Q96MK3	100
FAM3B	Oncology	OID21372	P58499	100
FAM3C	Cardiometabolic	OID20233	Q92520	100
FAM3D	Oncology_II	OID31514	Q96BQ1	100
FAP	Cardiometabolic	OID20330	Q12884	100
FARSA	Neurology_II	OID30887	Q9Y285	31.6054
FAS	Cardiometabolic	OID20316	P25445	100
FASLG	Inflammation	OID20665	P48023	100
FBLN2	Cardiometabolic_II	OID30378	P98095	100
FBN2	Neurology_II	OID30974	P35556	39.9666
FBP1	Cardiometabolic	OID20227	P09467	96.6555
FCAMR	Cardiometabolic_II	OID30332	Q8WWV6	100
FCAR	Inflammation	OID20564	P24071	100
FCER1A	Neurology_II	OID30992	P12319	99.6656
FCER2	Neurology	OID21133	P06734	100
FCGR2A	Cardiometabolic	OID20391	P12318	100
FCGR2B	Oncology	OID21215	P31994	91.3043
FCGR3B	Cardiometabolic	OID20387	O75015	100
FCN1	Inflammation_II	OID30690	O00602	99.8328
FCN2	Cardiometabolic	OID20382	Q15485	100
FCRL1	Cardiometabolic	OID20172	Q96LA6	100
FCRL2	Inflammation	OID20639	Q96LA5	100
FCRL3	Inflammation	OID20443	Q96P31	77.592
FCRL5	Neurology	OID21111	Q96RD9	100
FCRL6	Inflammation	OID20529	Q6DN72	100
FCRLB	Oncology	OID21193	Q6BAA4	99.3311
FDX1	Cardiometabolic_II	OID30078	P10109	18.7291
FDX2	Cardiometabolic_II	OID30147	Q6P4F2	10.8696
FEN1	Oncology	OID21192	P39748	92.4749
FES	Oncology	OID21207	P07332	0.501672
FETUB	Cardiometabolic	OID20404	Q9UGM5	100
FGA	Inflammation_II	OID30788	P02671	100
FGD3	Neurology_II	OID31040	Q5JSP0	85.9532
FGF12	Inflammation_II	OID30454	P61328	39.1304
FGF16	Inflammation_II	OID30535	O43320	44.3144
FGF19	Inflammation	OID20715	O95750	100
FGF2	Inflammation	OID20503	P09038	58.8629
FGF20	Inflammation_II	OID30459	Q9NP95	8.19398
FGF21	Oncology	OID21402	Q9NSA1	100
FGF23	Oncology	OID21411	Q9GZV9	100
FGF3	Inflammation_II	OID30544	P11487	1.67224
FGF5	Inflammation	OID20490	P12034	100
FGF6	Inflammation_II	OID30443	P10767	5.18395
FGF7	Oncology_II	OID31241	P21781	20.4013
FGF9	Oncology_II	OID31193	P31371	6.35452
FGFBP1	Oncology	OID21507	Q14512	100
FGFBP2	Cardiometabolic_II	OID30395	Q9BYJ0	100
FGFBP3	Neurology_II	OID31108	Q8TAT2	100
FGFR2	Oncology	OID21478	P21802	100
FGFR4	Inflammation_II	OID30646	P22455	100
FGL1	Inflammation_II	OID30702	Q08830	100
FGR	Neurology	OID20828	P09769	86.4548
FH	Neurology_II	OID30839	P07954	23.913
FHIP2A	Cardiometabolic_II	OID30187	Q5W0V3	16.2207
FHIT	Neurology	OID20872	P49789	95.1505
FIS1	Inflammation	OID20722	Q9Y3D6	100
FKBP14	Neurology_II	OID31065	Q9NWM8	99.6656
FKBP1B	Inflammation	OID20618	P68106	20.2341
FKBP4	Neurology	OID20960	Q02790	100
FKBP5	Neurology	OID20937	Q13451	100
FKBP7	Neurology	OID20846	Q9Y680	7.02341
FKBPL	Oncology_II	OID31499	Q9UIM3	97.9933
FLI1	Oncology	OID21239	Q01543	66.388
FLRT2	Neurology	OID20946	O43155	100
FLT1	Oncology	OID21301	P17948	100
FLT3	Oncology	OID21272	P36888	83.2776
FLT3LG	Inflammation	OID20661	P49771	100
FLT4	Oncology	OID21491	P35916	100
FMNL1	Neurology	OID20884	O95466	99.1639
FMR1	Oncology	OID21233	Q06787	2.00669
FN1	Inflammation_II	OID30787	P02751	100
FNDC1	Neurology_II	OID31127	Q4ZHG4	100
FNTA	Oncology_II	OID31381	P49354	99.8328
FOLH1	Inflammation_II	OID30430	Q04609	61.204
FOLR1	Oncology	OID21529	P15328	100
FOLR2	Neurology	OID21062	P14207	100
FOLR3	Oncology	OID21485	P41439	100
FOS	Oncology_II	OID31221	P01100	4.1806
FOSB	Neurology	OID20791	P53539	14.7157
FOXJ3	Inflammation_II	OID30445	Q9UPW0	44.9833
FOXO1	Inflammation	OID20515	Q12778	99.8328
FOXO3	Oncology	OID21271	O43524	46.4883
FRMD4B	Cardiometabolic_II	OID30155	Q9Y2L6	12.2074
FRMD7	Neurology_II	OID30898	Q6ZUT3	28.2609
FRZB	Neurology	OID20968	Q92765	100
FSHB	Cardiometabolic_II	OID30233	P01225	91.3043
FST	Inflammation	OID20770	P19883	100
FSTL1	Cardiometabolic_II	OID30254	Q12841	100
FSTL3	Inflammation	OID20782	O95633	100
FTCD	Neurology_II	OID31137	O95954	100
FUCA1	Cardiometabolic	OID20261	P04066	100
FUOM	Inflammation_II	OID30626	A2VDF0	100
FURIN	Oncology	OID21514	P09958	100
FUS	Oncology	OID21256	P35637	98.3278
FUT1	Oncology_II	OID31295	P19526	73.5786
FUT3_FUT5	Neurology	OID21013	P21217_Q11128	100
FUT8	Neurology	OID20992	Q9BYC5	100
FXN	Oncology	OID21442	Q16595	100
FXYD5	Inflammation	OID20463	Q96DB9	30.2676
FYB1	Neurology	OID21140	O15117	100
FZD10	Neurology_II	OID30931	Q9ULW2	20.7358
FZD8	Neurology_II	OID30818	Q9H461	15.5518
GABARAP	Oncology_II	OID31414	O95166	41.6388
GABARAPL1	Oncology_II	OID31253	Q9H0R8	8.3612
GABRA4	Neurology_II	OID30803	P48169	7.02341
GAD1	Oncology_II	OID31166	Q99259	10.7023
GAD2	Inflammation_II	OID30449	Q05329	2.67559
GADD45B	Oncology_II	OID31261	O75293	24.5819
GADD45GIP1	Cardiometabolic_II	OID30237	Q8TAE8	87.7926
GAGE2A	Oncology_II	OID31199	Q6NT46	13.2107
GAL	Inflammation	OID20727	P22466	100
GALNT10	Oncology	OID21371	Q86SR1	100
GALNT2	Oncology	OID21423	Q10471	100
GALNT3	Inflammation	OID20471	Q14435	98.9967
GALNT5	Cardiometabolic_II	OID30295	Q7Z7M9	99.6656
GALNT7	Oncology	OID21377	Q86SF2	100
GAMT	Cardiometabolic_II	OID30133	Q14353	4.68227
GAPDH	Inflammation_II	OID30600	P04406	100
GART	Neurology_II	OID31004	P22102	10.2007
GAS2	Oncology_II	OID31285	O43903	25.2508
GAS6	Cardiometabolic	OID20318	Q14393	100
GASK1A	Cardiometabolic_II	OID30109	Q9UFP1	82.6087
GAST	Neurology_II	OID31083	P01350	100
GATA3	Oncology_II	OID31219	P23771	1.50502
GATD3B	Cardiometabolic_II	OID30253	A0A0B4J2D5	100
GBA	Neurology_II	OID30966	P04062	40.8027
GBP1	Neurology_II	OID31128	P32455	100
GBP2	Inflammation	OID20489	P32456	10.0334
GBP4	Neurology	OID20845	Q96PP9	30.7692
GBP6	Cardiometabolic_II	OID30139	Q6ZN66	5.85284
GC	Inflammation_II	OID30780	P02774	100
GCC1	Neurology_II	OID31147	Q96CN9	99.8328
GCG	Oncology	OID21263	P01275	93.6455
GCHFR	Inflammation_II	OID30631	P30047	100
GCLM	Cardiometabolic_II	OID30059	P48507	52.5084
GCNT1	Oncology	OID21379	Q02742	100
GDF15	Cardiometabolic	OID20251	Q99988	100
GDF2	Cardiometabolic	OID20202	Q9UK05	100
GDNF	Neurology	OID20861	P39905	99.4983
GET3	Cardiometabolic_II	OID30303	O43681	99.3311
GFAP	Oncology	OID21247	P14136	80.602
GFER	Oncology	OID21259	P55789	100
GFOD2	Oncology	OID21216	Q3B7J2	36.4548
GFRA1	Oncology	OID21457	P56159	100
GFRA2	Oncology	OID21330	O00451	100
GFRA3	Neurology	OID20933	O60609	100
GFRAL	Neurology_II	OID31091	Q6UXV0	100
GGA1	Neurology	OID20838	Q9UJY5	26.9231
GGACT	Cardiometabolic_II	OID30290	Q9BVM4	99.1639
GGCT	Cardiometabolic_II	OID30304	O75223	100
GGH	Cardiometabolic	OID20416	Q92820	100
GGT1	Cardiometabolic_II	OID30392	P19440	100
GGT1	Neurology	OID21075	P19440	100
GGT5	Neurology	OID20909	P36269	100
GH1	Cardiometabolic	OID20220	P01241	100
GH2	Oncology	OID21168	P01242	48.495
GHR	Inflammation_II	OID30574	P10912	100
GHRHR	Neurology	OID20841	Q02643	26.7559
GHRL	Cardiometabolic	OID20175	Q9UBU3	100
GID8	Neurology_II	OID31041	Q9NWU2	5.35117
GIGYF2	Neurology_II	OID31062	Q6Y7W6	98.3278
GIMAP7	Inflammation_II	OID30639	Q8NHV1	100
GIMAP8	Oncology_II	OID31194	Q8ND71	82.4415
GIP	Cardiometabolic_II	OID30288	P09681	96.3211
GIPC2	Neurology_II	OID31153	Q8TF65	100
GIPC3	Oncology_II	OID31507	Q8TF64	100
GIPR	Inflammation_II	OID30542	P48546	10.7023
GIT1	Inflammation_II	OID30533	Q9Y2X7	99.1639
GJA8	Oncology_II	OID31187	P48165	8.02676
GKN1	Neurology	OID20885	Q9NS71	99.4983
GLA	Inflammation_II	OID30594	P06280	100
GLB1	Neurology	OID20949	P16278	99.8328
GLI2	Inflammation_II	OID30429	P10070	7.02341
GLIPR1	Oncology_II	OID31517	P48060	100
GLO1	Cardiometabolic	OID20107	Q04760	100
GLOD4	Inflammation	OID20710	Q9HC38	100
GLP1R	Neurology_II	OID30809	P43220	9.0301
GLRX	Cardiometabolic	OID20195	P35754	100
GLRX5	Inflammation_II	OID30663	Q86SX6	44.1472
GLT8D2	Neurology	OID20825	Q9H1C3	14.3813
GLYR1	Oncology_II	OID31364	Q49A26	97.6589
GM2A	Cardiometabolic_II	OID30413	P17900	100
GMFG	Cardiometabolic_II	OID30340	O60234	100
GMPR	Inflammation	OID20641	P36959	100
GMPR2	Inflammation_II	OID30623	Q9P2T1	100
GNAS	Neurology_II	OID31008	O95467	100
GNE	Oncology	OID21231	Q9Y223	65.8863
GNGT1	Neurology_II	OID30920	P63211	23.0769
GNLY	Neurology	OID21132	P22749	100
GNPDA1	Cardiometabolic_II	OID30197	P46926	99.6656
GNPDA2	Inflammation_II	OID30597	Q8TDQ7	100
GOLGA3	Neurology_II	OID31026	Q08378	99.4983
GOLM2	Neurology	OID21044	Q6P4E1	100
GOPC	Inflammation	OID20551	Q9HD26	98.8294
GORASP2	Oncology_II	OID31438	Q9H8Y8	89.2977
GOT1	Cardiometabolic_II	OID30417	P17174	100
GP1BA	Cardiometabolic	OID20381	P07359	100
GP1BB	Cardiometabolic_II	OID30174	P13224	85.6187
GP2	Cardiometabolic	OID20090	P55259	100
GP5	Inflammation_II	OID30611	P40197	100
GP6	Neurology	OID21091	Q9HCN6	100
GPA33	Oncology	OID21376	Q99795	100
GPC1	Oncology	OID21438	P35052	100
GPC5	Neurology	OID20944	P78333	100
GPD1	Oncology_II	OID31358	P21695	100
GPHA2	Oncology_II	OID31437	Q96T91	97.9933
GPI	Inflammation_II	OID30680	P06744	100
GPIHBP1	Oncology_II	OID31469	Q8IV16	99.8328
GPKOW	Neurology	OID20890	Q92917	67.893
GPNMB	Cardiometabolic	OID20173	Q14956	100
GPR101	Neurology_II	OID30819	Q96P66	21.5719
GPR158	Neurology_II	OID31013	Q5T848	98.3278
GPR15L	Oncology_II	OID31511	Q6UWK7	100
GPR37	Cardiometabolic	OID20095	O15354	99.3311
GPRC5C	Oncology_II	OID31340	Q9NQ84	84.4482
GRAP2	Cardiometabolic	OID20192	O75791	100
GRHPR	Cardiometabolic_II	OID30289	Q9UBQ7	100
GRIK2	Neurology_II	OID30977	Q13002	99.8328
GRIN2B	Neurology_II	OID30802	Q13224	50.6689
GRK5	Cardiometabolic	OID20066	P34947	34.6154
GRN	Neurology	OID21159	P28799	100
GRP	Cardiometabolic_II	OID30264	P07492	100
GRPEL1	Oncology	OID21309	Q9HAV7	100
GRSF1	Oncology_II	OID31224	Q12849	14.3813
GSAP	Oncology	OID21173	A4D1B5	39.6321
GSN	Inflammation_II	OID30714	P06396	100
GSR	Inflammation_II	OID30700	P00390	100
GSTA1	Cardiometabolic	OID20166	P08263	100
GSTA3	Oncology	OID21242	Q16772	79.097
GSTM4	Cardiometabolic_II	OID30164	Q03013	42.3077
GSTP1	Neurology	OID20876	P09211	41.9732
GSTT2B	Neurology_II	OID31097	P0CG30	100
GTF2IRD1	Oncology_II	OID31264	Q9UHL9	35.786
GTPBP2	Neurology_II	OID30946	Q9BX10	74.5819
GUCA2A	Neurology	OID21101	Q02747	100
GUCY2C	Oncology_II	OID31318	P25092	30.602
GUK1	Cardiometabolic_II	OID30148	Q16774	18.5619
GUSB	Cardiometabolic	OID20296	P08236	100
GYS1	Cardiometabolic	OID20097	P13807	98.495
GZMA	Inflammation	OID20663	P12544	100
GZMB	Inflammation	OID20604	P10144	100
GZMH	Cardiometabolic	OID20096	P20718	100
H2AP	Oncology_II	OID31232	O75409	13.7124
HADH	Cardiometabolic_II	OID30132	Q16836	7.52508
HAGH	Oncology	OID21459	Q16775	100
HAO1	Oncology	OID21395	Q9UJM8	100
HARS1	Neurology	OID21086	P12081	100
HAVCR1	Oncology	OID21422	Q96D42	100
HAVCR2	Neurology	OID21137	Q8TDQ0	100
HBEGF	Oncology	OID21465	Q99075	100
HBQ1	Oncology	OID21433	P09105	100
HBZ	Cardiometabolic_II	OID30307	P02008	93.9799
HCG22	Cardiometabolic_II	OID30088	E2RYF7	12.3746
HCLS1	Inflammation	OID20648	P14317	100
HDAC8	Inflammation_II	OID30436	Q9BY41	5.35117
HDAC9	Neurology_II	OID30832	Q9UKV0	10.8696
HDDC2	Oncology_II	OID31447	Q7Z4H3	99.8328
HDGF	Oncology	OID21455	P51858	100
HDGFL2	Neurology_II	OID31136	Q7Z4V5	100
HEBP1	Cardiometabolic	OID20063	Q9NRV9	28.5953
HEG1	Inflammation_II	OID30579	Q9ULI3	100
HEPACAM2	Neurology_II	OID31151	A8MVW5	100
HEPH	Cardiometabolic_II	OID30337	Q9BQS7	100
HEXIM1	Inflammation	OID20589	O94992	100
HGF	Inflammation	OID20656	P14210	100
HGFAC	Inflammation_II	OID30718	Q04756	100
HGS	Oncology	OID21175	O14964	94.4816
HHEX	Neurology_II	OID31107	Q03014	100
HIF1A	Inflammation_II	OID30425	Q16665	17.3913
HIP1	Cardiometabolic_II	OID30071	O00291	38.9632
HIP1R	Neurology_II	OID31141	O75146	100
HJV	Neurology_II	OID31006	Q6ZVN8	98.8294
HK2	Cardiometabolic	OID20065	P52789	11.5385
HLA-A	Neurology_II	OID31048	P04439	100
HLA-DRA	Inflammation	OID20520	P01903	50.1672
HLA-E	Inflammation	OID20532	P13747	100
HMBS	Oncology	OID21385	P08397	100
HMCN2	Inflammation_II	OID30592	Q8NDA2	100
HMGCL	Cardiometabolic_II	OID30214	P35914	66.2207
HMGCS1	Cardiometabolic_II	OID30157	Q01581	19.8997
HMMR	Oncology_II	OID31175	O75330	11.204
HMOX1	Cardiometabolic	OID20217	P09601	100
HMOX2	Neurology	OID20887	P30519	99.4983
HNF1A	Neurology_II	OID30919	P20823	10.3679
HNMT	Neurology	OID20975	P50135	100
HNRNPK	Cardiometabolic	OID20051	P61978	71.7391
HNRNPUL1	Neurology_II	OID31037	Q9BUJ2	99.8328
HPCAL1	Inflammation	OID20615	P37235	100
HPGDS	Oncology	OID21266	O60760	99.4983
HPSE	Cardiometabolic_II	OID30409	Q9Y251	100
HRAS	Oncology_II	OID31263	P01112	50.5017
HRC	Cardiometabolic_II	OID30211	P23327	100
HRG	Inflammation_II	OID30770	P04196	100
HS1BP3	Cardiometabolic_II	OID30243	Q53T59	100
HS3ST3B1	Oncology	OID21303	Q9Y662	100
HS6ST1	Oncology	OID21441	O60243	100
HS6ST2	Inflammation_II	OID30481	Q96MM7	100
HSBP1	Cardiometabolic_II	OID30232	O75506	98.6622
HSD11B1	Inflammation	OID20575	P28845	100
HSD17B14	Neurology_II	OID31098	Q9BPX1	99.4983
HSD17B3	Cardiometabolic_II	OID30145	P37058	19.8997
HSDL2	Cardiometabolic_II	OID30256	Q6YN16	100
HSP90B1	Neurology	OID20829	P14625	14.214
HSPA1A	Inflammation	OID20718	P0DMV8	100
HSPA2	Oncology_II	OID31424	P54652	95.8194
HSPB1	Cardiometabolic	OID20230	P04792	100
HSPB6	Oncology	OID21408	O14558	100
HSPG2	Cardiometabolic	OID20383	P98160	100
HTR1A	Neurology_II	OID30824	P08908	32.6087
HTR1B	Neurology_II	OID30866	P28222	14.8829
HTRA2	Oncology	OID21471	O43464	100
HYAL1	Cardiometabolic	OID20357	Q12794	100
HYOU1	Cardiometabolic	OID20300	Q9Y4L1	100
ICA1	Inflammation	OID20484	Q05084	34.7826
ICAM1	Cardiometabolic	OID20411	P05362	100
ICAM2	Cardiometabolic	OID20248	P13598	100
ICAM3	Cardiometabolic	OID20277	P32942	100
ICAM4	Inflammation	OID20578	Q14773	100
ICAM5	Cardiometabolic	OID20145	Q9UMF0	100
ICOSLG	Oncology	OID21351	O75144	100
ID4	Oncology_II	OID31284	P47928	16.8896
IDI2	Neurology	OID20823	Q9BXS1	15.3846
IDO1	Cardiometabolic_II	OID30230	P14902	100
IDO1	Inflammation_II	OID30563	P14902	100
IDO1	Neurology_II	OID31050	P14902	99.6656
IDO1	Oncology_II	OID31474	P14902	100
IDS	Inflammation	OID20619	P22304	100
IDUA	Oncology	OID21468	P35475	100
IFI30	Oncology_II	OID31505	P13284	100
IFIT1	Oncology_II	OID31310	P09914	12.2074
IFIT3	Oncology_II	OID31283	O14879	36.1204
IFNAR1	Oncology_II	OID31491	P17181	100
IFNG	Inflammation	OID20495	P01579	86.4548
IFNGR1	Inflammation	OID20678	P15260	100
IFNGR2	Neurology	OID20941	P38484	100
IFNL1	Neurology	OID20795	Q8IU54	3.67893
IFNL2	Neurology_II	OID30791	Q8IZJ0	13.3779
IFNLR1	Inflammation	OID20506	Q8IU57	100
IFNW1	Cardiometabolic_II	OID30129	P05000	19.8997
IFT20	Neurology_II	OID30962	Q8IY31	28.5953
IGBP1	Neurology_II	OID31059	P78318	99.8328
IGDCC3	Neurology_II	OID30862	Q8IVU1	10.7023
IGDCC4	Cardiometabolic_II	OID30402	Q8TDY8	100
IGF1R	Oncology	OID21274	P08069	100
IGF2BP3	Cardiometabolic_II	OID30112	O00425	14.3813
IGF2R	Neurology	OID21146	P11717	100
IGFBP1	Cardiometabolic	OID20246	P08833	100
IGFBP2	Cardiometabolic	OID20325	P18065	100
IGFBP3	Cardiometabolic	OID20398	P17936	100
IGFBP4	Neurology	OID21158	P22692	100
IGFBP6	Cardiometabolic	OID20413	P24592	100
IGFBP7	Cardiometabolic	OID20236	Q16270	100
IGFBPL1	Cardiometabolic	OID20155	Q8WX77	100
IGFL4	Inflammation_II	OID30500	Q6B9Z1	29.5987
IGHMBP2	Cardiometabolic_II	OID30123	P38935	65.2174
IGLC2	Inflammation_II	OID30740	P0DOY2	99.8328
IGLON5	Oncology_II	OID31169	A6NGN9	33.1104
IGSF21	Cardiometabolic_II	OID30210	Q96ID5	100
IGSF3	Oncology	OID21312	O75054	100
IGSF8	Cardiometabolic	OID20167	Q969P0	100
IGSF9	Cardiometabolic_II	OID30330	Q9P2J2	100
IKBKG	Inflammation	OID20544	Q9Y6K9	100
IKZF2	Oncology	OID21213	Q9UKS7	12.709
IL10	Inflammation	OID20431	P22301	84.6154
IL10RA	Inflammation	OID20420	Q13651	69.8997
IL10RB	Inflammation	OID20696	Q08334	100
IL11	Inflammation	OID20455	P20809	9.53177
IL12A_IL12B	Oncology	OID21327	P29459_P29460	100
IL12B	Inflammation	OID20666	P29460	100
IL12RB1	Inflammation	OID20486	P42701	65.3846
IL12RB2	Inflammation_II	OID30422	Q99665	7.19064
IL13	Inflammation	OID20430	P35225	27.592
IL13RA1	Oncology	OID21504	P78552	100
IL13RA2	Neurology_II	OID30841	Q14627	7.85953
IL15	Inflammation	OID20562	P40933	100
IL15RA	Inflammation	OID20498	Q13261	74.7492
IL16	Inflammation	OID20633	Q14005	100
IL17A	Inflammation	OID20469	Q16552	26.7559
IL17C	Inflammation	OID20477	Q9P0M4	94.8161
IL17D	Inflammation	OID20481	Q8TAD2	100
IL17F	Inflammation	OID20456	Q96PD4	31.6054
IL17RA	Neurology	OID21089	Q96F46	100
IL17RB	Inflammation	OID20585	Q9NRM6	100
IL18	Inflammation	OID20694	Q14116	100
IL18BP	Cardiometabolic	OID20348	O95998	100
IL18R1	Inflammation	OID20652	Q13478	100
IL18RAP	Neurology	OID20900	O95256	99.8328
IL19	Cardiometabolic	OID20158	Q9UHD0	99.8328
IL1A	Inflammation	OID20488	P01583	21.4047
IL1B	Inflammation	OID20427	P01584	51.505
IL1R1	Neurology	OID21116	P14778	100
IL1R2	Inflammation	OID20757	P27930	100
IL1RAP	Neurology	OID21126	Q9NPH3	100
IL1RL1	Cardiometabolic	OID20250	Q01638	100
IL1RL2	Inflammation	OID20487	Q9HB29	100
IL1RN	Inflammation	OID20700	P18510	100
IL2	Inflammation	OID20419	P60568	0.668896
IL20	Inflammation	OID20453	Q9NYY1	12.3746
IL20RA	Inflammation	OID20422	Q9UHF4	48.9967
IL20RB	Inflammation_II	OID30461	Q6UXL0	0.334448
IL21R	Inflammation_II	OID30441	Q9HBE5	9.36455
IL22	Oncology_II	OID31407	Q9GZX6	99.3311
IL22RA1	Inflammation	OID20449	Q8N6P7	55.1839
IL24	Inflammation	OID20440	Q13007	5.51839
IL25	Oncology_II	OID31243	Q9H293	6.35452
IL2RA	Cardiometabolic	OID20267	P01589	100
IL2RB	Inflammation	OID20450	P14784	22.9097
IL2RG	Oncology_II	OID31361	P31785	93.8127
IL3	Oncology_II	OID31229	P08700	8.3612
IL31	Inflammation_II	OID30487	Q6EBC2	33.612
IL31RA	Inflammation_II	OID30475	Q8NI17	96.6555
IL32	Inflammation	OID20605	P24001	100
IL33	Inflammation	OID20428	O95760	10.7023
IL34	Neurology	OID20809	Q6ZMJ4	38.1271
IL36A	Inflammation_II	OID30472	Q9UHA7	6.85619
IL36G	Inflammation_II	OID30551	Q9NZH8	93.4783
IL3RA	Inflammation	OID20461	P26951	62.8763
IL4	Inflammation	OID20426	P05112	17.3913
IL4R	Inflammation	OID20576	P24394	100
IL5	Inflammation	OID20472	P05113	21.5719
IL5RA	Inflammation	OID20601	Q01344	100
IL6	Cardiometabolic	OID20101	P05231	99.6656
IL6	Inflammation	OID20563	P05231	94.3144
IL6	Neurology	OID20911	P05231	99.8328
IL6	Oncology	OID21276	P05231	100
IL6R	Cardiometabolic	OID20385	P08887	100
IL6ST	Cardiometabolic	OID20147	P40189	100
IL7	Inflammation	OID20535	P13232	98.1605
IL7R	Neurology	OID21136	P16871	100
IL9	Oncology_II	OID31298	P15248	13.8796
ILKAP	Neurology	OID20855	Q9H0C8	66.5552
IMMT	Oncology_II	OID31397	Q16891	98.1605
IMPA1	Neurology	OID20907	P29218	62.0401
IMPACT	Neurology_II	OID31112	Q9P2X3	100
IMPG1	Neurology_II	OID30814	Q17R60	68.5619
ING1	Neurology	OID20853	Q9UK53	54.8495
INHBB	Inflammation_II	OID30625	P09529	100
INHBC	Neurology	OID21093	P55103	100
INPP1	Oncology	OID21345	P49441	100
INPP5D	Cardiometabolic_II	OID30259	Q92835	100
INPP5J	Neurology_II	OID30975	Q15735	92.8094
INPPL1	Oncology	OID21314	O15357	100
INSL3	Neurology_II	OID31129	P51460	35.786
INSL4	Oncology_II	OID31370	Q14641	68.5619
INSL5	Oncology_II	OID31448	Q9Y5Q6	100
INSR	Inflammation_II	OID30566	P06213	69.0635
IPCEF1	Neurology	OID20977	Q8WWN9	100
IQGAP2	Oncology	OID21361	Q13576	94.6488
IRAG2	Cardiometabolic	OID20085	Q12912	91.3043
IRAK1	Inflammation	OID20485	P51617	91.4716
IRAK4	Inflammation	OID20577	Q9NWZ3	100
ISLR2	Neurology	OID20889	Q6UXK2	97.1572
ISM1	Inflammation	OID20538	B1AKI9	100
ISM2	Cardiometabolic_II	OID30365	Q6H9L7	23.5786
IST1	Oncology_II	OID31497	P53990	99.8328
ITGA11	Inflammation	OID20581	Q9UKX5	100
ITGA2	Inflammation_II	OID30570	P17301	100
ITGA5	Neurology	OID21139	P08648	100
ITGA6	Inflammation	OID20528	P23229	96.1538
ITGAL	Inflammation_II	OID30537	P20701	99.1639
ITGAM	Neurology	OID21071	P11215	100
ITGAV	Oncology	OID21416	P06756	100
ITGAX	Oncology_II	OID31325	P20702	22.5753
ITGB1	Cardiometabolic	OID20376	P05556	100
ITGB1BP1	Oncology	OID21268	O14713	29.9331
ITGB1BP2	Cardiometabolic	OID20112	Q9UKP3	98.8294
ITGB2	Cardiometabolic	OID20315	P05107	100
ITGB5	Oncology	OID21522	P18084	100
ITGB6	Inflammation	OID20493	P18564	100
ITGB7	Oncology	OID21393	P26010	100
ITGBL1	Cardiometabolic_II	OID30408	O95965	100
ITIH1	Inflammation_II	OID30722	P19827	100
ITIH3	Cardiometabolic	OID20352	Q06033	100
ITIH4	Inflammation_II	OID30762	Q14624	100
ITIH5	Oncology_II	OID31430	Q86UX2	33.1104
ITM2A	Inflammation	OID20504	O43736	100
ITPA	Cardiometabolic_II	OID30082	Q9BY32	49.6656
ITPR1	Cardiometabolic_II	OID30216	Q14643	89.9666
ITPRIP	Neurology_II	OID30860	Q8IWB1	24.9164
IVD	Neurology	OID20833	P26440	41.806
IZUMO1	Oncology_II	OID31159	Q8IYV9	19.398
JAM2	Neurology	OID21064	P57087	100
JAM3	Inflammation_II	OID30586	Q9BX67	100
JCHAIN	Inflammation	OID20494	P01591	54.6823
JMJD1C	Oncology_II	OID31172	Q15652	18.2274
JPT2	Oncology_II	OID31520	Q9H910	100
JUN	Inflammation	OID20424	P05412	22.5753
KAZALD1	Oncology	OID21339	Q96I82	100
KAZN	Oncology_II	OID31481	Q674X7	99.3311
KCNC4	Neurology_II	OID30813	Q03721	33.2776
KCNH2	Neurology_II	OID30899	Q12809	28.7625
KCNIP4	Neurology	OID20813	Q6PIL6	13.2107
KCTD5	Neurology_II	OID31148	Q9NXV2	100
KDM3A	Inflammation_II	OID30426	Q9Y4C1	13.8796
KDR	Oncology	OID21497	P35968	100
KEL	Neurology	OID20881	P23276	100
KHDC3L	Oncology_II	OID31245	Q587J8	20.5686
KHK	Cardiometabolic_II	OID30241	P50053	100
KIAA0319	Neurology_II	OID31094	Q5VV43	100
KIAA1549	Oncology_II	OID31307	Q9HCM3	23.2441
KIAA1549L	Oncology_II	OID31312	Q6ZVL6	7.02341
KIAA2013	Oncology_II	OID31392	Q8IYS2	31.7726
KIF1C	Cardiometabolic_II	OID30163	O43896	98.9967
KIF20B	Neurology_II	OID30816	Q96Q89	31.7726
KIF22	Cardiometabolic_II	OID30175	Q14807	76.7559
KIFBP	Oncology	OID21320	Q96EK5	99.8328
KIR2DL2	Oncology_II	OID31431	P43627	99.6656
KIR2DL3	Oncology	OID21196	P43628	99.4983
KIR2DS4	Oncology_II	OID31432	P43632	73.2441
KIR3DL1	Oncology	OID21185	P43629	72.7425
KIR3DL2	Oncology_II	OID31191	P43630	43.1438
KIRREL1	Neurology_II	OID30806	Q96J84	30.9365
KIRREL2	Neurology	OID20873	Q6UWL6	99.1639
KIT	Cardiometabolic	OID20370	P10721	100
KITLG	Cardiometabolic	OID20196	P21583	100
KLB	Neurology	OID20888	Q86Z14	76.5886
KLF4	Neurology_II	OID30808	O43474	68.8963
KLHL41	Neurology_II	OID30986	O60662	93.1438
KLK1	Oncology	OID21499	P06870	100
KLK10	Oncology	OID21523	O43240	100
KLK11	Oncology	OID21518	Q9UBX7	100
KLK12	Oncology	OID21201	Q9UKR0	72.408
KLK13	Oncology	OID21291	Q9UKR3	100
KLK14	Oncology	OID21407	Q9P0G3	100
KLK15	Oncology_II	OID31427	Q9H2R5	99.3311
KLK3	Cardiometabolic_II	OID30364	P07288	18.7291
KLK4	Oncology	OID21391	Q9Y5K2	100
KLK6	Oncology	OID21526	Q92876	100
KLK7	Inflammation_II	OID30652	P49862	100
KLK8	Oncology	OID21517	O60259	100
KLKB1	Inflammation_II	OID30760	P03952	100
KLRB1	Inflammation	OID20629	Q12918	100
KLRC1	Neurology_II	OID30855	P26715	48.495
KLRD1	Inflammation	OID20632	Q13241	100
KLRF1	Inflammation_II	OID30464	Q9NZS2	100
KLRK1	Neurology_II	OID31082	P26718	100
KNG1	Inflammation_II	OID30695	P01042	100
KRT14	Neurology	OID20800	P02533	7.19064
KRT17	Cardiometabolic_II	OID30092	Q04695	5.18395
KRT18	Oncology	OID21296	P05783	100
KRT19	Inflammation	OID20596	P08727	100
KRT5	Neurology	OID20860	P13647	55.3512
KRT6C	Cardiometabolic_II	OID30169	P48668	6.68896
KRT8	Neurology_II	OID30865	P05787	25.4181
KYAT1	Cardiometabolic	OID20232	Q16773	100
KYNU	Inflammation	OID20669	Q16719	100
L1CAM	Oncology	OID21484	P32004	100
L3HYPDH	Cardiometabolic_II	OID30314	Q96EM0	100
LACRT	Oncology_II	OID31367	Q9GZZ8	84.7826
LACTB2	Cardiometabolic	OID20150	Q53H82	100
LAG3	Oncology	OID21315	P18627	100
LAIR1	Inflammation	OID20737	Q6GTX8	100
LAIR2	Neurology	OID20965	Q6ISS4	97.3244
LAMA1	Cardiometabolic_II	OID30057	P25391	12.0401
LAMA4	Inflammation	OID20769	Q16363	100
LAMB1	Cardiometabolic_II	OID30280	P07942	100
LAMP1	Cardiometabolic_II	OID30416	P11279	100
LAMP2	Neurology	OID21035	P13473	100
LAMP3	Inflammation	OID20638	Q9UQV4	100
LAMTOR5	Oncology_II	OID31396	O43504	29.097
LAP3	Inflammation	OID20436	P28838	76.4214
LARP1	Oncology_II	OID31372	Q6PKG0	73.5786
LAT	Inflammation	OID20640	O43561	100
LAT2	Oncology	OID21292	Q9GZY6	99.4983
LATS1	Inflammation_II	OID30523	O95835	40.301
LAYN	Neurology	OID20970	Q6UX15	100
LBP	Cardiometabolic	OID20355	P18428	100
LBR	Neurology	OID21034	Q14739	100
LCAT	Inflammation_II	OID30677	P04180	100
LCN15	Neurology_II	OID31032	Q6UWW0	99.8328
LCN2	Cardiometabolic	OID20392	P80188	100
LCP1	Cardiometabolic_II	OID30367	P13796	100
LDLR	Cardiometabolic	OID20240	P01130	100
LDLRAP1	Neurology_II	OID31068	Q5SW96	76.2542
LECT2	Cardiometabolic_II	OID30320	O14960	99.8328
LEFTY2	Oncology	OID21454	O00292	100
LEG1	Inflammation_II	OID30608	Q6P5S2	100
LELP1	Neurology_II	OID30845	Q5T871	25.0836
LEO1	Neurology_II	OID30991	Q8WVC0	61.3712
LEP	Cardiometabolic	OID20187	P41159	100
LEPR	Cardiometabolic	OID20128	P48357	100
LETM1	Neurology_II	OID31018	O95202	57.8595
LGALS1	Cardiometabolic	OID20154	P09382	100
LGALS3	Cardiometabolic	OID20284	P17931	100
LGALS3BP	Inflammation_II	OID30765	Q08380	100
LGALS4	Inflammation	OID20748	P56470	100
LGALS7_LGALS7B	Oncology	OID21406	P47929	100
LGALS8	Neurology	OID21041	O00214	100
LGALS9	Inflammation	OID20781	O00182	100
LGMN	Inflammation	OID20773	Q99538	100
LHB	Oncology	OID21248	P01229	90.301
LHPP	Inflammation	OID20749	Q9H008	100
LIF	Neurology	OID20824	P15018	25.5853
LIFR	Inflammation	OID20606	P42702	100
LILRA2	Neurology	OID21152	Q8N149	100
LILRA3	Cardiometabolic_II	OID30376	Q8N6C8	94.3144
LILRA4	Cardiometabolic_II	OID30162	P59901	16.0535
LILRA5	Cardiometabolic	OID20209	A6NI73	100
LILRA6	Cardiometabolic_II	OID30346	Q6PI73	100
LILRB1	Cardiometabolic	OID20323	Q8NHL6	100
LILRB2	Cardiometabolic	OID20301	Q8N423	100
LILRB4	Inflammation	OID20429	Q8NHJ6	100
LILRB5	Cardiometabolic	OID20324	O75023	100
LIPF	Cardiometabolic_II	OID30266	P07098	100
LMNB1	Oncology_II	OID31501	P20700	74.0803
LMNB2	Neurology_II	OID31109	Q03252	100
LMOD1	Cardiometabolic_II	OID30212	P29536	100
LMOD1	Inflammation_II	OID30547	P29536	100
LMOD1	Neurology_II	OID31014	P29536	100
LMOD1	Oncology_II	OID31416	P29536	99.8328
LMOD2	Neurology_II	OID30864	Q6P5Q4	31.9398
LONP1	Cardiometabolic_II	OID30219	P36776	89.2977
LPA	Inflammation_II	OID30747	P08519	100
LPCAT2	Oncology	OID21290	Q7L5N7	96.3211
LPL	Cardiometabolic	OID20188	P06858	100
LPO	Neurology	OID20963	P22079	100
LPP	Cardiometabolic_II	OID30190	Q93052	74.5819
LRCH4	Cardiometabolic_II	OID30191	O75427	100
LRFN2	Neurology_II	OID30895	Q9ULH4	21.2375
LRG1	Inflammation_II	OID30751	P02750	100
LRIG1	Oncology	OID21429	Q96JA1	100
LRIG3	Inflammation_II	OID30450	Q6UXM1	1.00334
LRP1	Oncology	OID21293	Q07954	100
LRP11	Cardiometabolic	OID20185	Q86VZ4	100
LRP2	Neurology_II	OID30960	P98164	25.9197
LRP2BP	Neurology_II	OID30907	Q9P2M1	21.2375
LRPAP1	Neurology	OID21059	P30533	100
LRRC25	Oncology	OID21333	Q8N386	100
LRRC37A2	Oncology_II	OID31440	A6NM11	100
LRRC38	Neurology_II	OID30924	Q5VT99	34.6154
LRRC59	Cardiometabolic_II	OID30361	Q96AG4	51.3378
LRRFIP1	Oncology_II	OID31344	Q32MZ4	93.311
LRRN1	Inflammation	OID20438	Q6UXK5	100
LRTM1	Neurology_II	OID30906	Q9HBL6	25.7525
LRTM2	Neurology_II	OID31020	Q8N967	100
LSM1	Oncology	OID21210	O15116	23.0769
LSM8	Oncology_II	OID31269	O95777	28.2609
LSP1	Inflammation	OID20530	P33241	100
LTA	Inflammation	OID20586	P01374	100
LTA4H	Oncology	OID21452	P09960	27.9264
LTB	Oncology_II	OID31383	Q06643	56.1873
LTBP2	Cardiometabolic	OID20254	Q14767	100
LTBP3	Oncology	OID21191	Q9NS15	100
LTBR	Inflammation	OID20768	P36941	100
LTO1	Inflammation	OID20434	Q8WV07	8.19398
LUZP2	Oncology_II	OID31402	Q86TE4	100
LXN	Neurology	OID21003	Q9BS40	100
LY6D	Inflammation	OID20708	Q14210	100
LY75	Inflammation	OID20580	O60449	100
LY9	Inflammation	OID20670	Q9HBG7	100
LY96	Neurology	OID20945	Q9Y6Y9	100
LYAR	Oncology	OID21264	Q9NX58	13.7124
LYN	Oncology	OID21350	P07948	100
LYPD1	Neurology	OID20821	Q8N2G4	32.9431
LYPD3	Oncology	OID21530	O95274	100
LYPD8	Oncology	OID21251	Q6UX82	57.5251
LYPLA2	Neurology_II	OID30817	O95372	28.0936
LYSMD3	Neurology_II	OID30950	Q7Z3D4	96.1538
LYVE1	Inflammation_II	OID30728	Q9Y5Y7	100
LYZL2	Oncology_II	OID31180	Q7Z4W2	61.3712
LZTFL1	Inflammation_II	OID30637	Q9NQ48	98.1605
M6PR	Cardiometabolic_II	OID30208	P20645	61.204
MAD1L1	Neurology	OID20904	Q9Y6D9	100
MAEA	Oncology	OID21206	Q7L5Y9	42.1405
MAG	Neurology_II	OID30967	P20916	89.4649
MAGEA3	Oncology_II	OID31331	P43357	9.86622
MAGED1	Oncology	OID21181	Q9Y5V3	17.2241
MAMDC2	Cardiometabolic_II	OID30309	Q7Z304	100
MAMDC4	Oncology_II	OID31342	Q6UXC1	99.8328
MAN1A2	Cardiometabolic_II	OID30262	O60476	100
MAN2B2	Cardiometabolic_II	OID30306	Q9Y2E5	100
MANEAL	Oncology_II	OID31244	Q5VSG8	51.1706
MANF	Inflammation	OID20707	P55145	100
MANSC1	Oncology	OID21492	Q9H8J5	100
MANSC4	Cardiometabolic_II	OID30141	A6NHS7	25.0836
MAP1LC3A	Neurology_II	OID30868	Q9H492	31.6054
MAP1LC3B2	Cardiometabolic_II	OID30074	A6NCE7	6.35452
MAP2	Neurology_II	OID31138	P11137	22.9097
MAP2K1	Oncology_II	OID31468	Q02750	100
MAP2K6	Inflammation	OID20552	P52564	100
MAP3K5	Oncology	OID21253	Q99683	62.8763
MAP4K5	Neurology	OID20899	Q9Y4K4	99.6656
MAPK13	Oncology_II	OID31205	O15264	7.35786
MAPK9	Inflammation	OID20557	P45984	95.9866
MAPKAPK2	Oncology_II	OID31293	P49137	64.214
MAPRE3	Oncology_II	OID31177	Q9UPY8	13.5452
MAPT	Neurology	OID20830	P10636	0.501672
MARCO	Cardiometabolic	OID20210	Q9UEW3	100
MARS1	Inflammation_II	OID30658	P56192	100
MASP1	Neurology	OID20954	P48740	100
MATN2	Inflammation	OID20767	O00339	100
MATN3	Neurology	OID20979	O15232	100
MAVS	Oncology	OID21204	Q7Z434	100
MAX	Neurology	OID20877	P61244	79.5987
MB	Cardiometabolic	OID20263	P02144	100
MBL2	Inflammation_II	OID30759	P11226	99.8328
MCAM	Cardiometabolic	OID20343	P43121	100
MCEE	Neurology_II	OID31033	Q96PE7	20.903
MCEMP1	Inflammation_II	OID30501	Q8IX19	92.4749
MCFD2	Cardiometabolic	OID20171	Q8NI22	100
MCTS1	Oncology_II	OID31444	Q9ULC4	5.01672
MDGA1	Neurology	OID20951	Q8NFP4	100
MDH1	Inflammation_II	OID30669	P40925	100
MDK	Oncology	OID21489	P21741	100
MDM1	Neurology_II	OID30945	Q8TC05	29.4314
MECR	Cardiometabolic_II	OID30274	Q9BV79	95.9866
MED18	Oncology	OID21236	Q9BUE0	97.1572
MED21	Cardiometabolic_II	OID30066	Q13503	7.69231
MEGF10	Inflammation	OID20746	Q96KG7	100
MEGF11	Cardiometabolic_II	OID30099	A6BM72	99.6656
MEGF9	Cardiometabolic	OID20285	Q9H1U4	100
MELTF	Cardiometabolic_II	OID30347	P08582	100
MENT	Inflammation_II	OID30595	Q9BUN1	100
MEP1A	Oncology_II	OID31459	Q16819	100
MEP1B	Cardiometabolic	OID20168	Q16820	98.1605
MEPE	Inflammation	OID20753	Q9NQ76	100
MERTK	Inflammation	OID20657	Q12866	100
MESD	Neurology	OID21099	Q14696	100
MET	Cardiometabolic	OID20269	P08581	100
METAP1	Neurology	OID20815	P53582	1.50502
METAP1D	Inflammation	OID20519	Q6UB28	98.6622
METAP2	Oncology	OID21437	P50579	100
MFAP3	Cardiometabolic	OID20057	P55082	53.5117
MFAP3L	Neurology_II	OID30933	O75121	26.4214
MFAP4	Inflammation_II	OID30598	P55083	100
MFAP5	Cardiometabolic	OID20239	Q13361	100
MFGE8	Neurology	OID21134	Q08431	100
MGLL	Inflammation	OID20711	Q99685	100
MGMT	Inflammation	OID20588	P16455	100
MIA	Oncology	OID21531	Q16674	100
MICALL2	Neurology_II	OID30889	Q8IY33	28.5953
MICB_MICA	Inflammation	OID20593	Q29980_Q29983	94.6488
MIF	Neurology	OID21073	P14174	100
MILR1	Inflammation	OID20482	Q7Z6M3	100
MINDY1	Oncology_II	OID31399	Q8N5J2	58.8629
MINK1	Neurology_II	OID31156	Q8N4C8	95.6522
MITD1	Neurology	OID20959	Q8WV92	100
MKI67	Inflammation_II	OID30455	P46013	83.4448
MLLT1	Oncology_II	OID31211	Q03111	29.9331
MLN	Inflammation	OID20541	P12872	100
MME	Oncology	OID21307	P08473	100
MMP1	Inflammation	OID20672	P03956	100
MMP10	Inflammation	OID20687	P09238	100
MMP12	Oncology	OID21439	P39900	100
MMP13	Neurology	OID20807	P45452	18.7291
MMP15	Cardiometabolic_II	OID30299	P51511	10.0334
MMP3	Neurology	OID21083	P08254	100
MMP7	Cardiometabolic	OID20087	P09237	100
MMP8	Neurology	OID21019	P22894	100
MMP9	Neurology	OID21103	P14780	100
MMUT	Cardiometabolic_II	OID30159	P22033	7.02341
MN1	Neurology_II	OID30908	Q10571	28.0936
MNAT1	Oncology_II	OID31327	P51948	32.7759
MNDA	Cardiometabolic	OID20156	P41218	100
MOCS2	Inflammation_II	OID30638	O96007	100
MOG	Oncology	OID21384	Q16653	100
MORC3	Neurology_II	OID31073	Q14149	54.1806
MORF4L1	Oncology_II	OID31257	Q9UBU8	10.7023
MORF4L2	Oncology_II	OID31160	Q15014	10.2007
MORN4	Oncology_II	OID31217	Q8NDC4	12.8763
MPHOSPH8	Cardiometabolic	OID20092	Q99549	67.3913
MPI	Oncology	OID21288	P34949	100
MPIG6B	Inflammation	OID20779	O95866	100
MPO	Neurology	OID21100	P05164	100
MPRIP	Oncology_II	OID31420	Q6WCQ1	98.495
MRC1	Inflammation_II	OID30694	P22897	100
MRI1	Neurology_II	OID30891	Q9BV20	99.6656
MRPL24	Cardiometabolic_II	OID30178	Q96A35	9.0301
MRPL28	Neurology_II	OID31023	Q13084	21.9064
MRPL46	Neurology	OID20858	Q9H2W6	11.8729
MRPL52	Oncology_II	OID31239	Q86TS9	1.83946
MRPL58	Neurology_II	OID31036	Q14197	31.9398
MRPS16	Inflammation_II	OID30489	Q9Y3D3	3.17726
MSLN	Oncology	OID21380	Q13421	100
MSLNL	Neurology_II	OID30939	Q96KJ4	32.7759
MSMB	Cardiometabolic	OID20275	P08118	99.8328
MSR1	Neurology	OID21063	P21757	100
MSRA	Oncology	OID21513	Q9UJ68	100
MST1	Inflammation_II	OID30713	P26927	99.3311
MSTN	Cardiometabolic	OID20115	O14793	100
MTDH	Inflammation_II	OID30538	Q86UE4	87.4582
MTHFD2	Neurology_II	OID31078	P13995	6.68896
MTHFSD	Oncology_II	OID31305	Q2M296	39.4649
MTIF3	Oncology_II	OID31513	Q9H2K0	89.4649
MTPN	Cardiometabolic	OID20080	P58546	4.01338
MTR	Cardiometabolic_II	OID30110	Q99707	10.8696
MTSS1	Oncology_II	OID31492	O43312	87.6254
MTSS2	Oncology_II	OID31409	Q765P7	96.8227
MTUS1	Oncology_II	OID31315	Q9ULD2	96.99
MUC13	Neurology	OID20866	Q9H3R2	98.9967
MUC16	Oncology	OID21378	Q8WXI7	6.18729
MUC2	Cardiometabolic_II	OID30377	Q02817	98.495
MUCL3	Oncology_II	OID31170	Q3MIW9	7.02341
MVK	Inflammation	OID20459	Q03426	85.786
MXRA8	Inflammation_II	OID30583	Q9BRK3	100
MYBPC1	Cardiometabolic_II	OID30296	Q00872	99.8328
MYBPC2	Cardiometabolic_II	OID30199	Q14324	58.6957
MYCBP2	Neurology_II	OID30996	O75592	100
MYDGF	Cardiometabolic_II	OID30313	Q969H8	100
MYH4	Cardiometabolic_II	OID30061	Q9Y623	27.0903
MYH7B	Oncology_II	OID31178	A7E2Y1	10.8696
MYH9	Cardiometabolic_II	OID30382	P35579	100
MYL1	Cardiometabolic_II	OID30120	P05976	8.19398
MYL3	Cardiometabolic_II	OID30251	P08590	100
MYL4	Cardiometabolic_II	OID30245	P12829	95.9866
MYL6B	Neurology_II	OID30936	P14649	15.3846
MYLPF	Neurology_II	OID30917	Q96A32	68.8963
MYO6	Neurology_II	OID30989	Q9UM54	5.01672
MYO9B	Inflammation	OID20451	Q13459	41.1371
MYOC	Neurology	OID21121	Q99972	100
MYOM1	Neurology_II	OID30834	P52179	6.02007
MYOM2	Cardiometabolic_II	OID30131	P54296	28.4281
MYOM3	Inflammation_II	OID30633	Q5VTT5	100
MZB1	Inflammation	OID20732	Q8WU39	100
MZT1	Oncology	OID21186	Q08AG7	31.6054
NAA10	Cardiometabolic_II	OID30188	P41227	36.2876
NAA80	Neurology_II	OID30893	Q93015	84.9498
NAAA	Neurology	OID20931	Q02083	100
NACC1	Oncology_II	OID31393	Q96RE7	75.0836
NADK	Cardiometabolic	OID20178	O95544	100
NAGA	Inflammation_II	OID30509	P17050	78.9298
NAGK	Cardiometabolic_II	OID30271	Q9UJ70	100
NAGPA	Inflammation_II	OID30643	Q9UK23	100
NAMPT	Oncology	OID21227	P43490	58.0268
NAP1L4	Oncology_II	OID31475	Q99733	100
NAPRT	Neurology_II	OID31114	Q6XQN6	91.3043
NARS1	Neurology_II	OID31035	O43776	62.3746
NBL1	Oncology	OID21486	P41271	100
NBN	Inflammation	OID20442	O60934	98.1605
NCAM1	Cardiometabolic	OID20354	P13591	100
NCAM2	Neurology	OID21095	O15394	100
NCAN	Neurology	OID21055	O14594	100
NCF2	Inflammation	OID20567	P19878	100
NCK2	Inflammation	OID20683	O43639	99.8328
NCLN	Inflammation	OID20448	Q969V3	9.699
NCR1	Inflammation	OID20566	O76036	100
NCR3LG1	Oncology_II	OID31490	Q68D85	100
NCS1	Oncology	OID21458	P62166	100
NDRG1	Neurology	OID20792	Q92597	77.7592
NDST1	Oncology_II	OID31369	P52848	26.2542
NDUFA2	Cardiometabolic_II	OID30073	O43678	27.2575
NDUFA5	Inflammation_II	OID30520	Q16718	17.7258
NDUFB7	Oncology_II	OID31521	P17568	70.4013
NDUFS6	Oncology	OID21224	O75380	78.0936
NEB	Cardiometabolic_II	OID30105	P20929	65.2174
NECAP2	Cardiometabolic_II	OID30089	Q9NVZ3	75.9197
NECTIN1	Inflammation_II	OID30545	Q15223	45.9866
NECTIN2	Cardiometabolic	OID20222	Q92692	100
NECTIN4	Oncology	OID21490	Q96NY8	100
NEDD4L	Inflammation_II	OID30521	Q96PU5	98.1605
NEDD9	Inflammation_II	OID30503	Q14511	14.7157
NEFL	Neurology	OID20871	P07196	99.6656
NEK7	Oncology_II	OID31250	Q8TDX7	51.6722
NELL1	Oncology	OID21494	Q92832	100
NELL2	Inflammation	OID20706	Q99435	100
NENF	Oncology_II	OID31354	Q9UMX5	32.6087
NEO1	Neurology_II	OID31066	Q92859	100
NEXN	Inflammation_II	OID30678	Q0ZGT2	92.1405
NFASC	Inflammation	OID20634	O94856	97.6589
NFAT5	Inflammation_II	OID30522	O94916	13.3779
NFATC1	Inflammation	OID20545	O95644	100
NFATC3	Inflammation	OID20470	Q12968	18.3946
NFE2	Cardiometabolic_II	OID30268	Q16621	100
NFIC	Neurology_II	OID30988	P08651	41.806
NFKB1	Cardiometabolic_II	OID30160	P19838	99.8328
NFKB2	Oncology_II	OID31258	Q00653	39.2977
NFKBIE	Oncology	OID21212	O00221	73.913
NFU1	Oncology_II	OID31510	Q9UMS0	95.4849
NFX1	Cardiometabolic_II	OID30158	Q12986	66.5552
NFYA	Cardiometabolic_II	OID30134	P23511	56.689
NGF	Neurology	OID20920	P01138	0.167224
NGFR	Cardiometabolic_II	OID30300	P08138	44.9833
NGRN	Neurology_II	OID31115	Q9NPE2	49.4983
NHLRC3	Inflammation_II	OID30614	Q5JS37	100
NID1	Cardiometabolic	OID20362	P14543	100
NID2	Neurology	OID21085	Q14112	100
NINJ1	Oncology	OID21167	Q92982	69.8997
NIT1	Cardiometabolic_II	OID30252	Q86X76	100
NIT2	Cardiometabolic_II	OID30336	Q9NQR4	100
NLGN1	Neurology_II	OID30900	Q8N2Q7	32.9431
NLGN2	Neurology_II	OID30878	Q8NFZ4	11.8729
NME1	Inflammation_II	OID30451	P15531	8.02676
NME3	Inflammation	OID20789	Q13232	100
NMI	Oncology_II	OID31378	Q13287	96.99
NMNAT1	Neurology	OID20913	Q9HAN9	100
NMRK2	Oncology_II	OID31163	Q9NPI5	13.0435
NMT1	Neurology_II	OID31021	P30419	61.0368
NOMO1	Neurology	OID21106	Q15155	100
NOP56	Cardiometabolic_II	OID30055	O00567	73.7458
NOS1	Neurology	OID20863	P29475	94.1472
NOS2	Cardiometabolic_II	OID30087	P35228	86.2876
NOS3	Neurology	OID20834	P29474	66.0535
NOTCH1	Cardiometabolic	OID20311	P46531	100
NOTCH2	Cardiometabolic_II	OID30407	Q04721	100
NOTCH3	Cardiometabolic	OID20253	Q9UM47	100
NPC2	Cardiometabolic_II	OID30418	P61916	100
NPDC1	Cardiometabolic	OID20205	Q9NQX5	100
NPHS1	Inflammation_II	OID30540	O60500	93.1438
NPHS2	Inflammation_II	OID30462	Q9NP85	42.3077
NPL	Cardiometabolic_II	OID30329	Q9BXD5	100
NPM1	Neurology	OID20961	P06748	99.6656
NPPB	Cardiometabolic	OID20049	P16860	33.4448
NPPC	Inflammation	OID20568	P23582	100
NPR1	Cardiometabolic_II	OID30116	P16066	34.1137
NPTN	Oncology	OID21235	Q9Y639	76.9231
NPTX1	Neurology	OID21074	Q15818	100
NPTX2	Cardiometabolic_II	OID30390	P47972	100
NPTXR	Cardiometabolic	OID20191	O95502	100
NPY	Oncology	OID21388	P01303	100
NRCAM	Cardiometabolic	OID20229	Q92823	100
NRGN	Inflammation_II	OID30674	Q92686	98.8294
NRN1	Neurology_II	OID30983	Q9NPD7	9.86622
NRP1	Cardiometabolic	OID20390	O14786	100
NRP2	Neurology	OID21081	O60462	100
NRTN	Inflammation	OID20465	Q99748	18.5619
NRXN3	Neurology_II	OID30901	Q9Y4C0	21.5719
NSFL1C	Neurology	OID21022	Q9UNZ2	100
NT5C	Cardiometabolic_II	OID30294	Q8TCD5	100
NT5C1A	Neurology_II	OID31102	Q9BXI3	100
NT5C3A	Inflammation	OID20553	Q9H0P0	100
NT5E	Oncology	OID21498	P21589	100
NTF3	Inflammation	OID20591	P20783	100
NTF4	Oncology	OID21208	P34130	63.5452
NTRK2	Cardiometabolic	OID20136	Q16620	100
NTRK3	Neurology	OID21057	Q16288	100
NTproBNP	Cardiometabolic	OID20125	NTproBNP	88.2943
NUB1	Inflammation	OID20510	Q9Y5A7	99.4983
NUBP1	Oncology_II	OID31412	P53384	15.8863
NUCB2	Oncology	OID21448	P80303	100
NUDC	Inflammation	OID20623	Q9Y266	100
NUDT10	Cardiometabolic_II	OID30198	Q8NFP7	7.69231
NUDT15	Cardiometabolic_II	OID30102	Q9NV35	27.7592
NUDT16	Oncology_II	OID31484	Q96DE0	100
NUDT2	Oncology	OID21308	P50583	49.6656
NUDT5	Neurology	OID21115	Q9UKK9	100
NUMB	Inflammation_II	OID30568	P49757	100
NUP50	Cardiometabolic_II	OID30100	Q9UKX7	11.3712
NXPE4	Cardiometabolic_II	OID30076	Q6UWF7	31.1037
NXPH1	Neurology	OID20849	P58417	74.5819
NXPH3	Inflammation_II	OID30565	O95157	100
OBP2B	Neurology	OID20980	Q9NPH6	100
OCLN	Neurology_II	OID31069	Q16625	100
ODAM	Neurology	OID20793	A1E959	63.5452
OFD1	Oncology_II	OID31268	O75665	17.7258
OGA	Oncology_II	OID31465	O60502	100
OGFR	Oncology	OID21360	Q9NZT2	100
OGN	Neurology	OID21123	P20774	100
OGT	Oncology_II	OID31300	O15294	14.0468
OLFM4	Inflammation_II	OID30665	Q6UX06	99.8328
OLR1	Cardiometabolic	OID20183	P78380	100
OMD	Inflammation	OID20725	Q99983	100
OMG	Oncology	OID21352	P23515	100
OMP	Neurology_II	OID30835	P47874	21.9064
OPHN1	Neurology_II	OID31087	O60890	98.8294
OPLAH	Cardiometabolic_II	OID30201	O14841	94.6488
OPTC	Oncology	OID21362	Q9UBM4	100
ORM1	Inflammation_II	OID30768	P02763	100
OSBPL2	Neurology_II	OID31085	Q9H1P3	13.3779
OSCAR	Inflammation	OID20776	Q8IYS5	100
OSM	Inflammation	OID20574	P13725	100
OSMR	Cardiometabolic	OID20356	Q99650	100
OSTN	Neurology_II	OID30909	P61366	51.3378
OTOA	Neurology_II	OID30825	Q7RTW8	40.301
OTUD6B	Oncology_II	OID31487	Q8N6M0	99.1639
OTUD7B	Neurology_II	OID31064	Q6GQQ9	100
OXCT1	Cardiometabolic_II	OID30227	P55809	100
OXT	Neurology	OID21047	P01178	100
P4HB	Oncology	OID21509	P07237	100
PACS2	Cardiometabolic_II	OID30186	Q86VP3	76.7559
PADI2	Inflammation	OID20467	Q9Y2J8	42.9766
PADI4	Neurology	OID20832	Q9UM07	87.6254
PAEP	Neurology	OID20925	P09466	87.4582
PAFAH1B3	Neurology_II	OID30998	Q15102	18.2274
PAFAH2	Oncology_II	OID31286	Q99487	46.99
PAG1	Cardiometabolic	OID20108	Q9NWQ8	100
PAGR1	Cardiometabolic_II	OID30206	Q9BTK6	91.4716
PAIP2B	Oncology_II	OID31228	Q9ULR5	14.0468
PAK4	Neurology	OID20819	O96013	22.0736
PALLD	Inflammation_II	OID30444	Q8WX93	43.6455
PALM	Oncology_II	OID31515	O75781	100
PALM2	Neurology_II	OID31096	Q8IXS6	100
PALM3	Cardiometabolic_II	OID30182	A6NDB9	9.53177
PAM	Cardiometabolic	OID20291	P19021	100
PAMR1	Neurology	OID21153	Q6UXH9	100
PAPPA	Inflammation	OID20421	Q13219	28.0936
PARD3	Oncology_II	OID31301	Q8TEW0	10.8696
PARK7	Neurology	OID21160	Q99497	100
PARP1	Inflammation	OID20500	P09874	99.8328
PAXX	Inflammation_II	OID30591	Q9BUH6	100
PBK	Oncology_II	OID31158	Q96KB5	15.0502
PBLD	Neurology	OID20839	P30039	53.1773
PBXIP1	Oncology_II	OID31435	Q96AQ6	100
PCARE	Neurology_II	OID30838	A6NGG8	34.7826
PCBD1	Inflammation_II	OID30610	P61457	100
PCBP2	Neurology_II	OID31003	Q15366	99.6656
[truncated: 950 more rows]

## Sheet: ST6
OlinkID	Assay	UniProt	term	estimate	std.error	statistic	p.value	p.value_adjusted
OID30771	A1BG	P04217	age	0.00482027	0.00145229	3.31908	0.000968906	0.0172386
OID30771	A1BG	P04217	alcohol_gram_week	-0.00030825	0.000144161	-2.13824	0.0329808	0.230066
OID30771	A1BG	P04217	birth_times	0.0122735	0.00826665	1.4847	0.138252	0.516668
OID30771	A1BG	P04217	bmi	0.0116308	0.00197157	5.89924	6.72695e-09	5.96625e-07
OID30771	A1BG	P04217	HRT.current	-0.0199144	0.0324898	-0.612945	0.540191	0.860164
OID30771	A1BG	P04217	menopause_status.peri	0.0324929	0.0491134	0.661589	0.508539	0.842458
OID30771	A1BG	P04217	menopause_status.post	0.0507244	0.0298266	1.70064	0.0896313	0.413489
OID30771	A1BG	P04217	smoking.current	0.0211662	0.0238607	0.887074	0.375465	0.759285
OID30236	AAMDC	Q9H7C9	age	-0.00296994	0.00406326	-0.730925	0.465181	0.819792
OID30236	AAMDC	Q9H7C9	alcohol_gram_week	8.5647e-05	0.000417909	0.204942	0.837704	0.963889
OID30236	AAMDC	Q9H7C9	birth_times	0.0193173	0.0233213	0.82831	0.407906	0.783712
OID30236	AAMDC	Q9H7C9	bmi	0.0164041	0.00557333	2.94333	0.003404	0.0460639
OID30236	AAMDC	Q9H7C9	HRT.current	0.0436642	0.0923514	0.472805	0.636567	0.900461
OID30236	AAMDC	Q9H7C9	menopause_status.peri	-0.101762	0.139602	-0.728948	0.466388	0.820403
OID30236	AAMDC	Q9H7C9	menopause_status.post	0.171656	0.0835921	2.0535	0.0405645	0.262743
OID30236	AAMDC	Q9H7C9	smoking.current	0.0139065	0.0668098	0.208151	0.835199	0.963425
OID21311	AARSD1	Q9BTE6	age	0.00743753	0.00537491	1.38375	0.167079	0.561501
OID21311	AARSD1	Q9BTE6	alcohol_gram_week	0.000232441	0.000527364	0.44076	0.659585	0.908828
OID21311	AARSD1	Q9BTE6	birth_times	0.0314233	0.030577	1.02768	0.30462	0.709222
OID21311	AARSD1	Q9BTE6	bmi	0.00390723	0.00711102	0.549462	0.582944	0.879152
OID21311	AARSD1	Q9BTE6	HRT.current	0.0752324	0.117717	0.639098	0.523065	0.851338
OID21311	AARSD1	Q9BTE6	menopause_status.peri	-0.0485943	0.180738	-0.268865	0.788149	0.951604
OID21311	AARSD1	Q9BTE6	menopause_status.post	0.147896	0.109705	1.34813	0.178254	0.575685
OID21311	AARSD1	Q9BTE6	smoking.current	0.187485	0.0866943	2.1626	0.0310663	0.222028
OID30146	ABCA2	Q9BZC7	age	0.00929629	0.00335307	2.77247	0.00577559	0.0688866
OID30146	ABCA2	Q9BZC7	alcohol_gram_week	-0.000207277	0.000336208	-0.616516	0.537841	0.85867
OID30146	ABCA2	Q9BZC7	birth_times	0.0350075	0.0189251	1.84979	0.0649467	0.3476
OID30146	ABCA2	Q9BZC7	bmi	0.00689315	0.00455963	1.51178	0.131236	0.504088
OID30146	ABCA2	Q9BZC7	HRT.current	-0.0736502	0.0753555	-0.977369	0.32887	0.728171
OID30146	ABCA2	Q9BZC7	menopause_status.peri	-0.151538	0.115772	-1.30893	0.191172	0.596106
OID30146	ABCA2	Q9BZC7	menopause_status.post	-0.0142341	0.0687164	-0.207143	0.835985	0.963425
OID30146	ABCA2	Q9BZC7	smoking.current	0.0345838	0.0546646	0.632655	0.527254	0.852862
OID20921	ABHD14B	Q96IU4	age	0.000139518	0.00469338	0.0297266	0.976297	0.996385
OID20921	ABHD14B	Q96IU4	alcohol_gram_week	0.00019479	0.000470572	0.413943	0.679098	0.91586
OID20921	ABHD14B	Q96IU4	birth_times	0.00439921	0.0265203	0.165881	0.868319	0.971764
OID20921	ABHD14B	Q96IU4	bmi	0.0113842	0.006314	1.80301	0.0720029	0.36856
OID20921	ABHD14B	Q96IU4	HRT.current	0.0692057	0.103326	0.66978	0.503315	0.838629
OID20921	ABHD14B	Q96IU4	menopause_status.peri	-0.334704	0.156295	-2.14148	0.0327296	0.229066
OID20921	ABHD14B	Q96IU4	menopause_status.post	0.187626	0.09709	1.93249	0.0538772	0.310623
OID20921	ABHD14B	Q96IU4	smoking.current	0.101727	0.0771924	1.31784	0.188175	0.590741
OID21280	ABL1	P00519	age	0.00703044	0.00406149	1.731	0.0840959	0.399515
OID21280	ABL1	P00519	alcohol_gram_week	-0.000161741	0.000398497	-0.405877	0.685014	0.91755
OID21280	ABL1	P00519	birth_times	0.00375222	0.0231052	0.162397	0.871062	0.971869
OID21280	ABL1	P00519	bmi	0.0245526	0.00537337	4.56931	6.23343e-06	0.000259364
OID21280	ABL1	P00519	HRT.current	0.0664037	0.0889514	0.746516	0.455722	0.814981
OID21280	ABL1	P00519	menopause_status.peri	-0.0140141	0.136573	-0.102613	0.918313	0.982177
OID21280	ABL1	P00519	menopause_status.post	0.0209259	0.0828972	0.252432	0.800815	0.955148
OID21280	ABL1	P00519	smoking.current	-0.0342224	0.0655097	-0.522402	0.601632	0.887218
OID30675	ABO	P16442	age	0.0160348	0.0138391	1.15866	0.247147	0.659071
OID30675	ABO	P16442	alcohol_gram_week	0.000521408	0.00136475	0.382055	0.702583	0.924241
OID30675	ABO	P16442	birth_times	-0.0805993	0.0786333	-1.025	0.305858	0.709782
OID30675	ABO	P16442	bmi	-0.00148403	0.0186537	-0.0795569	0.936622	0.987418
OID30675	ABO	P16442	HRT.current	-0.0262753	0.307639	-0.0854096	0.93197	0.98632
OID30675	ABO	P16442	menopause_status.peri	-0.929413	0.465213	-1.99782	0.0462773	0.283504
OID30675	ABO	P16442	menopause_status.post	0.120889	0.283946	0.425746	0.670476	0.91272
OID30675	ABO	P16442	smoking.current	0.443113	0.225994	1.96073	0.0504658	0.298928
OID30130	ABRAXAS2	Q15018	age	-0.00244833	0.00421497	-0.580864	0.5616	0.869431
OID30130	ABRAXAS2	Q15018	alcohol_gram_week	9.40643e-06	0.00042263	0.0222569	0.982252	0.99786
OID30130	ABRAXAS2	Q15018	birth_times	-0.0226428	0.0237898	-0.951785	0.341676	0.736144
OID30130	ABRAXAS2	Q15018	bmi	0.00138036	0.00573167	0.240831	0.809787	0.957157
OID30130	ABRAXAS2	Q15018	HRT.current	-0.170698	0.0947255	-1.80203	0.0721565	0.368946
OID30130	ABRAXAS2	Q15018	menopause_status.peri	-0.171569	0.145532	-1.17891	0.239007	0.651229
OID30130	ABRAXAS2	Q15018	menopause_status.post	0.0168962	0.0863798	0.195604	0.845001	0.965152
OID30130	ABRAXAS2	Q15018	smoking.current	0.0914243	0.068716	1.33047	0.183985	0.584895
OID21269	ACAA1	P09110	age	0.00831405	0.00707802	1.17463	0.240722	0.653274
OID21269	ACAA1	P09110	alcohol_gram_week	0.000288829	0.000700085	0.412562	0.680111	0.916236
OID21269	ACAA1	P09110	birth_times	0.0270741	0.0399041	0.678478	0.497794	0.837012
OID21269	ACAA1	P09110	bmi	0.0219323	0.00943669	2.32415	0.0205313	0.168835
OID21269	ACAA1	P09110	HRT.current	-0.130035	0.154512	-0.841588	0.400435	0.777344
OID21269	ACAA1	P09110	menopause_status.peri	-0.14929	0.233594	-0.6391	0.523061	0.851338
OID21269	ACAA1	P09110	menopause_status.post	-0.0505885	0.144906	-0.349113	0.727157	0.933864
OID21269	ACAA1	P09110	smoking.current	0.113358	0.114276	0.991968	0.32171	0.722107
OID31277	ACADM	P11310	age	-0.0131149	0.00720516	-1.82021	0.0693483	0.360512
OID31277	ACADM	P11310	alcohol_gram_week	-0.000171077	0.000716941	-0.23862	0.811502	0.957201
OID31277	ACADM	P11310	birth_times	-0.00606761	0.0406476	-0.149273	0.8814	0.974301
OID31277	ACADM	P11310	bmi	0.00891533	0.00967978	0.921026	0.357499	0.74676
OID31277	ACADM	P11310	HRT.current	-0.198652	0.163982	-1.21143	0.226327	0.638361
OID31277	ACADM	P11310	menopause_status.peri	0.379011	0.237052	1.59885	0.11051	0.461853
OID31277	ACADM	P11310	menopause_status.post	0.258002	0.147483	1.74937	0.080865	0.391819
OID31277	ACADM	P11310	smoking.current	-0.126575	0.118709	-1.06627	0.286838	0.694948
OID30356	ACADSB	P45954	age	0.00981896	0.00485817	2.02112	0.0437962	0.274652
OID30356	ACADSB	P45954	alcohol_gram_week	0.000153212	0.000481961	0.317892	0.750699	0.940966
OID30356	ACADSB	P45954	birth_times	0.0100458	0.0275433	0.364726	0.715469	0.92861
OID30356	ACADSB	P45954	bmi	-0.00404693	0.00659176	-0.613937	0.539535	0.859931
OID30356	ACADSB	P45954	HRT.current	-0.0236678	0.108716	-0.217703	0.827749	0.96154
OID30356	ACADSB	P45954	menopause_status.peri	0.034448	0.164293	0.209674	0.834007	0.963101
OID30356	ACADSB	P45954	menopause_status.post	-0.079077	0.0996725	-0.793369	0.427937	0.797695
OID30356	ACADSB	P45954	smoking.current	-0.311868	0.0798381	-3.90626	0.000106542	0.00286935
OID20159	ACAN	P16112	age	0.0125248	0.00249316	5.02366	7.05944e-07	3.90954e-05
OID20159	ACAN	P16112	alcohol_gram_week	-0.000178011	0.000247449	-0.719385	0.472238	0.823579
OID20159	ACAN	P16112	birth_times	0.00965626	0.014129	0.683435	0.494647	0.835102
OID20159	ACAN	P16112	bmi	-0.0169587	0.00338314	-5.01272	7.45243e-07	4.10789e-05
OID20159	ACAN	P16112	HRT.current	-0.134756	0.0557739	-2.41612	0.0160428	0.143691
OID20159	ACAN	P16112	menopause_status.peri	0.0457167	0.0842807	0.542433	0.587761	0.881969
OID20159	ACAN	P16112	menopause_status.post	0.206546	0.051186	4.0352	6.30602e-05	0.00186197
OID20159	ACAN	P16112	smoking.current	-0.133638	0.0409614	-3.26254	0.00117936	0.0202795
OID30696	ACE	P12821	age	0.00306469	0.00305307	1.00381	0.315957	0.717642
OID30696	ACE	P12821	alcohol_gram_week	-0.000703894	0.00030108	-2.3379	0.0197859	0.165174
OID30696	ACE	P12821	birth_times	-0.00622817	0.0173475	-0.359025	0.719728	0.930498
OID30696	ACE	P12821	bmi	-0.00939066	0.00411523	-2.28193	0.0229128	0.181761
OID30696	ACE	P12821	HRT.current	-0.112759	0.0678689	-1.66142	0.0972562	0.429286
OID30696	ACE	P12821	menopause_status.peri	0.081545	0.102632	0.79454	0.427258	0.797332
OID30696	ACE	P12821	menopause_status.post	0.079721	0.0626419	1.27265	0.203735	0.611959
OID30696	ACE	P12821	smoking.current	0.024915	0.0498571	0.499728	0.617486	0.893891
OID20105	ACE2	Q9BYF1	age	0.0116812	0.00350813	3.32974	0.000933855	0.0167159
OID20105	ACE2	Q9BYF1	alcohol_gram_week	-0.000341893	0.000347812	-0.982983	0.326094	0.725789
OID20105	ACE2	Q9BYF1	birth_times	0.0139063	0.0200609	0.693201	0.488507	0.83183
OID20105	ACE2	Q9BYF1	bmi	0.0205078	0.00474792	4.31931	1.89059e-05	0.00066671
OID20105	ACE2	Q9BYF1	HRT.current	-0.0180261	0.0791179	-0.227839	0.819865	0.959126
OID20105	ACE2	Q9BYF1	menopause_status.peri	-0.144239	0.118034	-1.22202	0.222281	0.634194
OID20105	ACE2	Q9BYF1	menopause_status.post	0.0609452	0.0720022	0.846436	0.397717	0.775846
OID20105	ACE2	Q9BYF1	smoking.current	0.099544	0.0574255	1.73344	0.083637	0.398954
OID30585	ACHE	P22303	age	0.00559019	0.00288876	1.93515	0.0535455	0.309543
OID30585	ACHE	P22303	alcohol_gram_week	-0.0005018	0.000293198	-1.71147	0.0876257	0.40847
OID30585	ACHE	P22303	birth_times	0.016895	0.0163862	1.03105	0.303026	0.708578
OID30585	ACHE	P22303	bmi	-0.00659692	0.00393569	-1.67618	0.0943401	0.423857
OID30585	ACHE	P22303	HRT.current	0.066737	0.0657554	1.01493	0.31064	0.712913
OID30585	ACHE	P22303	menopause_status.peri	0.118933	0.0968652	1.22782	0.220104	0.631598
OID30585	ACHE	P22303	menopause_status.post	0.0786017	0.0594489	1.32217	0.186726	0.588936
OID30585	ACHE	P22303	smoking.current	-0.097835	0.0476337	-2.0539	0.0405142	0.2626
OID31522	ACOT13	Q9NPJ3	age	0.000258226	0.00963856	0.026791	0.978637	0.996931
OID31522	ACOT13	Q9NPJ3	alcohol_gram_week	-0.000285343	0.000946471	-0.301481	0.763176	0.944674
OID31522	ACOT13	Q9NPJ3	birth_times	0.0430671	0.054311	0.792972	0.428178	0.797753
OID31522	ACOT13	Q9NPJ3	bmi	0.0139371	0.0129667	1.07484	0.282974	0.692179
OID31522	ACOT13	Q9NPJ3	HRT.current	-0.0171393	0.217819	-0.0786859	0.937315	0.987594
OID31522	ACOT13	Q9NPJ3	menopause_status.peri	0.0360117	0.319629	0.112667	0.91034	0.980289
OID31522	ACOT13	Q9NPJ3	menopause_status.post	0.0830794	0.197857	0.419895	0.674746	0.914248
OID31522	ACOT13	Q9NPJ3	smoking.current	-0.243276	0.158624	-1.53367	0.125757	0.493735
OID20124	ACOX1	Q15067	age	0.00385226	0.00342298	1.12541	0.260952	0.671771
OID20124	ACOX1	Q15067	alcohol_gram_week	-0.000126031	0.000339734	-0.370968	0.710818	0.926191
OID20124	ACOX1	Q15067	birth_times	0.0328934	0.0193984	1.69567	0.0905677	0.415671
OID20124	ACOX1	Q15067	bmi	0.00357774	0.00464488	0.770255	0.441511	0.807093
OID20124	ACOX1	Q15067	HRT.current	0.0396032	0.0765747	0.517183	0.605256	0.888681
OID20124	ACOX1	Q15067	menopause_status.peri	-0.0231522	0.115713	-0.200083	0.841497	0.964654
OID20124	ACOX1	Q15067	menopause_status.post	-0.0777607	0.0702757	-1.10651	0.269036	0.679886
OID20124	ACOX1	Q15067	smoking.current	0.0509087	0.0562379	0.905239	0.365773	0.753258
OID30524	ACP1	P24666	age	0.00457735	0.0042689	1.07225	0.284136	0.693
OID30524	ACP1	P24666	alcohol_gram_week	0.000435936	0.000423589	1.02915	0.30392	0.709222
OID30524	ACP1	P24666	birth_times	0.0166007	0.0244443	0.679124	0.497381	0.836843
OID30524	ACP1	P24666	bmi	-0.00742747	0.00578295	-1.28437	0.199621	0.606447
OID30524	ACP1	P24666	HRT.current	0.0589183	0.0955819	0.616417	0.537907	0.85867
OID30524	ACP1	P24666	menopause_status.peri	-0.174492	0.142935	-1.22078	0.222758	0.63447
OID30524	ACP1	P24666	menopause_status.post	0.0638765	0.087675	0.72856	0.46662	0.820403
OID30524	ACP1	P24666	smoking.current	0.0498659	0.0697482	0.714941	0.474987	0.825353
OID20314	ACP5	P13686	age	0.010939	0.00257263	4.25208	2.52555e-05	0.000851181
OID20314	ACP5	P13686	alcohol_gram_week	-1.64239e-05	0.000255221	-0.0643516	0.948716	0.989815
OID20314	ACP5	P13686	birth_times	0.034972	0.0145855	2.39772	0.0168608	0.148525
OID20314	ACP5	P13686	bmi	0.00737737	0.00349065	2.11347	0.0350526	0.239488
OID20314	ACP5	P13686	HRT.current	-0.229646	0.0575704	-3.98895	7.62228e-05	0.00216657
OID20314	ACP5	P13686	menopause_status.peri	0.188888	0.087001	2.1711	0.0303901	0.218453
OID20314	ACP5	P13686	menopause_status.post	0.14819	0.0527813	2.80762	0.00518479	0.0635275
OID20314	ACP5	P13686	smoking.current	0.13716	0.042278	3.24423	0.00125598	0.0212867
OID21432	ACP6	Q9NPH0	age	0.00488886	0.00558314	0.875648	0.381648	0.764041
OID21432	ACP6	Q9NPH0	alcohol_gram_week	-0.000367927	0.000554693	-0.663299	0.507449	0.841678
OID21432	ACP6	Q9NPH0	birth_times	-0.00308022	0.0315388	-0.0976644	0.922238	0.983743
OID21432	ACP6	Q9NPH0	bmi	0.00273323	0.00748065	0.365373	0.71499	0.928243
OID21432	ACP6	Q9NPH0	HRT.current	-0.163422	0.122685	-1.33204	0.183461	0.584294
OID21432	ACP6	Q9NPH0	menopause_status.peri	0.343819	0.185344	1.85504	0.0641877	0.345183
OID21432	ACP6	Q9NPH0	menopause_status.post	0.250458	0.113851	2.19987	0.0282794	0.207929
OID21432	ACP6	Q9NPH0	smoking.current	0.146074	0.09074	1.60981	0.10808	0.457041
OID31385	ACRBP	Q8NEB7	age	-0.000654204	0.00257661	-0.253901	0.799678	0.954903
OID31385	ACRBP	Q8NEB7	alcohol_gram_week	-0.000369349	0.000252253	-1.4642	0.143781	0.525089
OID31385	ACRBP	Q8NEB7	birth_times	0.0237429	0.0144927	1.63827	0.102007	0.441568
OID31385	ACRBP	Q8NEB7	bmi	0.00358394	0.00345894	1.03614	0.300649	0.707382
OID31385	ACRBP	Q8NEB7	HRT.current	-0.0342864	0.0579816	-0.591333	0.55457	0.866797
OID31385	ACRBP	Q8NEB7	menopause_status.peri	0.0902035	0.0850812	1.06021	0.289573	0.697602
OID31385	ACRBP	Q8NEB7	menopause_status.post	0.0880258	0.0527143	1.66986	0.0955848	0.427414
OID31385	ACRBP	Q8NEB7	smoking.current	0.0073045	0.0422287	0.172975	0.862743	0.970815
OID30513	ACRV1	P26436	age	-0.000371233	0.00305022	-0.121707	0.903181	0.979094
OID30513	ACRV1	P26436	alcohol_gram_week	0.000130685	0.000302663	0.431783	0.66609	0.911075
OID30513	ACRV1	P26436	birth_times	0.0426475	0.0174659	2.44176	0.0149701	0.136999
OID30513	ACRV1	P26436	bmi	0.00199449	0.00413204	0.482689	0.629533	0.897432
OID30513	ACRV1	P26436	HRT.current	-0.0578248	0.0682952	-0.846689	0.397583	0.775766
OID30513	ACRV1	P26436	menopause_status.peri	0.0121414	0.10213	0.118882	0.905418	0.97962
OID30513	ACRV1	P26436	menopause_status.post	0.0727829	0.0626456	1.16182	0.245876	0.657752
OID30513	ACRV1	P26436	smoking.current	0.0471066	0.0498365	0.945222	0.345013	0.738578
OID30080	ACSL1	P33121	age	-0.00368883	0.0054219	-0.680356	0.496601	0.836485
OID30080	ACSL1	P33121	alcohol_gram_week	-0.000954292	0.000543647	-1.75535	0.0798254	0.389502
OID30080	ACSL1	P33121	birth_times	0.0133633	0.0306019	0.436682	0.662535	0.909587
OID30080	ACSL1	P33121	bmi	0.00913207	0.0073729	1.2386	0.216088	0.627512
OID30080	ACSL1	P33121	HRT.current	0.00187089	0.12185	0.0153541	0.987756	0.999295
OID30080	ACSL1	P33121	menopause_status.peri	-0.0742978	0.187204	-0.396882	0.691627	0.920297
OID30080	ACSL1	P33121	menopause_status.post	0.122081	0.111114	1.0987	0.272441	0.682742
OID30080	ACSL1	P33121	smoking.current	0.0918026	0.0883924	1.03858	0.299513	0.70659
OID20079	ACTA2	P62736	age	0.0307343	0.00405253	7.58397	1.66024e-13	3.87805e-11
OID20079	ACTA2	P62736	alcohol_gram_week	-0.000695664	0.000401786	-1.73143	0.0839957	0.3992
OID20079	ACTA2	P62736	birth_times	0.0173248	0.023174	0.747597	0.455057	0.814948
OID20079	ACTA2	P62736	bmi	0.0131748	0.00548471	2.4021	0.0166674	0.147642
OID20079	ACTA2	P62736	HRT.current	0.0528744	0.0913955	0.578523	0.563173	0.870382
OID20079	ACTA2	P62736	menopause_status.peri	-0.00448668	0.136351	-0.0329055	0.973763	0.996055
OID20079	ACTA2	P62736	menopause_status.post	0.018966	0.0831756	0.228024	0.819722	0.959126
OID20079	ACTA2	P62736	smoking.current	-0.0266776	0.0663369	-0.402153	0.687744	0.918758
OID30192	ACTN2	P35609	age	0.0100551	0.00567046	1.77325	0.0768095	0.381906
OID30192	ACTN2	P35609	alcohol_gram_week	-0.000531672	0.00056857	-0.935105	0.350196	0.742319
OID30192	ACTN2	P35609	birth_times	0.00110094	0.0320047	0.0343993	0.972573	0.996047
OID30192	ACTN2	P35609	bmi	0.01902	0.00771089	2.46665	0.0139803	0.130623
OID30192	ACTN2	P35609	HRT.current	-0.00522561	0.127436	-0.0410059	0.967308	0.994934
OID30192	ACTN2	P35609	menopause_status.peri	0.0288179	0.195786	0.147191	0.883042	0.974448
OID30192	ACTN2	P35609	menopause_status.post	0.0970273	0.116208	0.834946	0.404156	0.780329
OID30192	ACTN2	P35609	smoking.current	-0.0687391	0.0924446	-0.743571	0.457493	0.81547
OID20435	ACTN4	O43707	age	0.00205326	0.00289123	0.710167	0.477932	0.827065
OID20435	ACTN4	O43707	alcohol_gram_week	-0.000680477	0.000290707	-2.34077	0.0196371	0.164353
OID20435	ACTN4	O43707	birth_times	0.00214041	0.0164077	0.130451	0.896262	0.977396
OID20435	ACTN4	O43707	bmi	-0.00165638	0.00392706	-0.421785	0.673363	0.913926
OID20435	ACTN4	O43707	HRT.current	-0.0163265	0.0654475	-0.24946	0.803108	0.955695
OID20435	ACTN4	O43707	menopause_status.peri	-0.0989894	0.0976652	-1.01356	0.311285	0.713319
OID20435	ACTN4	O43707	menopause_status.post	0.0308076	0.059337	0.519196	0.603854	0.888083
OID20435	ACTN4	O43707	smoking.current	-0.0118457	0.0474721	-0.249531	0.803053	0.955695
OID20999	ACVRL1	P37023	age	0.0093488	0.00197071	4.74387	2.7574e-06	0.000126071
OID20999	ACVRL1	P37023	alcohol_gram_week	-0.000308888	0.000197589	-1.56328	0.118635	0.478761
OID20999	ACVRL1	P37023	birth_times	-0.00806352	0.0111357	-0.724117	0.469341	0.821645
OID20999	ACVRL1	P37023	bmi	0.0153929	0.0026512	5.80602	1.15369e-08	9.79058e-07
OID20999	ACVRL1	P37023	HRT.current	-0.0364047	0.0433858	-0.839093	0.401828	0.778766
OID20999	ACVRL1	P37023	menopause_status.peri	0.0432778	0.0656272	0.659448	0.509919	0.843357
OID20999	ACVRL1	P37023	menopause_status.post	0.0687858	0.0407673	1.68728	0.0921888	0.418958
OID20999	ACVRL1	P37023	smoking.current	0.239293	0.0324125	7.38273	6.74306e-13	1.40781e-10
OID20137	ACY1	Q03154	age	0.00960311	0.0049332	1.94663	0.0521368	0.304332
OID20137	ACY1	Q03154	alcohol_gram_week	0.00136374	0.000489626	2.78526	0.00555059	0.066607
OID20137	ACY1	Q03154	birth_times	0.0389976	0.027957	1.39491	0.163659	0.557119
OID20137	ACY1	Q03154	bmi	0.0490297	0.0066942	7.3242	9.63827e-13	1.89231e-10
OID20137	ACY1	Q03154	HRT.current	-0.118615	0.11036	-1.0748	0.28298	0.692179
OID20137	ACY1	Q03154	menopause_status.peri	0.137446	0.166766	0.824186	0.410225	0.784912
OID20137	ACY1	Q03154	menopause_status.post	0.117789	0.101282	1.16299	0.245388	0.657515
OID20137	ACY1	Q03154	smoking.current	0.223653	0.0810502	2.75944	0.00600156	0.0709719
OID30086	ACY3	Q96HD9	age	0.0131914	0.00441724	2.98633	0.00296511	0.0415891
OID30086	ACY3	Q96HD9	alcohol_gram_week	-0.000338507	0.000442911	-0.764277	0.445071	0.809197
OID30086	ACY3	Q96HD9	birth_times	0.0103576	0.0249314	0.415443	0.678	0.915579
OID30086	ACY3	Q96HD9	bmi	0.0100485	0.00600672	1.67287	0.0949919	0.425731
OID30086	ACY3	Q96HD9	HRT.current	-0.192265	0.0992713	-1.93676	0.0533505	0.308881
OID30086	ACY3	Q96HD9	menopause_status.peri	0.0126693	0.152515	0.0830693	0.93383	0.986746
OID30086	ACY3	Q96HD9	menopause_status.post	0.0544789	0.090525	0.60181	0.547579	0.864674
OID30086	ACY3	Q96HD9	smoking.current	0.0887496	0.0720136	1.2324	0.218391	0.629865
OID30642	ACYP1	P07311	age	0.00022411	0.00560688	0.0399704	0.968133	0.995259
OID30642	ACYP1	P07311	alcohol_gram_week	2.77652e-05	0.000569077	0.04879	0.961106	0.993729
OID30642	ACYP1	P07311	birth_times	0.0279566	0.0318046	0.879013	0.379824	0.762577
OID30642	ACYP1	P07311	bmi	0.0053609	0.00763891	0.701789	0.483143	0.828996
OID30642	ACYP1	P07311	HRT.current	0.0934879	0.127627	0.73251	0.464207	0.819299
OID30642	ACYP1	P07311	menopause_status.peri	-0.249158	0.188009	-1.32525	0.185706	0.587161
OID30642	ACYP1	P07311	menopause_status.post	0.124956	0.115386	1.08294	0.279368	0.68877
OID30642	ACYP1	P07311	smoking.current	0.156216	0.0924538	1.68967	0.0917259	0.417921
OID20645	ADA	P00813	age	-0.00109089	0.00299072	-0.364759	0.715445	0.92861
OID20645	ADA	P00813	alcohol_gram_week	-0.00056732	0.000296698	-1.91211	0.0564297	0.320602
OID20645	ADA	P00813	birth_times	0.000880287	0.0169558	0.0519164	0.958616	0.993091
OID20645	ADA	P00813	bmi	-0.00456464	0.00405793	-1.12487	0.261182	0.671805
OID20645	ADA	P00813	HRT.current	-0.0771548	0.0669265	-1.15283	0.249528	0.661333
OID20645	ADA	P00813	menopause_status.peri	-0.0274256	0.10114	-0.271165	0.786375	0.951003
OID20645	ADA	P00813	menopause_status.post	0.174947	0.061359	2.85121	0.00453437	0.0578714
OID20645	ADA	P00813	smoking.current	0.0609406	0.0491488	1.23992	0.215583	0.627232
OID20394	ADA2	Q9NZK5	age	0.011856	0.00351513	3.37284	0.000802044	0.0148236
OID20394	ADA2	Q9NZK5	alcohol_gram_week	-0.00138173	0.000348	-3.97048	8.23197e-05	0.00230926
OID20394	ADA2	Q9NZK5	birth_times	0.0242479	0.0199813	1.21353	0.225503	0.637495
OID20394	ADA2	Q9NZK5	bmi	0.0139354	0.00475634	2.92985	0.00354719	0.0476839
OID20394	ADA2	Q9NZK5	HRT.current	-0.12357	0.0791031	-1.56214	0.118891	0.479222
OID20394	ADA2	Q9NZK5	menopause_status.peri	-0.0198084	0.118012	-0.167851	0.866769	0.971154
OID20394	ADA2	Q9NZK5	menopause_status.post	0.0367117	0.0718161	0.511191	0.609444	0.889839
OID20394	ADA2	Q9NZK5	smoking.current	-0.122308	0.0573636	-2.13215	0.0334843	0.232273
OID30491	ADAM12	O43184	age	0.00533086	0.00333331	1.59927	0.110408	0.46174
OID30491	ADAM12	O43184	alcohol_gram_week	-0.000184762	0.000330754	-0.558609	0.576685	0.876979
OID30491	ADAM12	O43184	birth_times	0.0394432	0.019087	2.0665	0.0393084	0.258305
OID30491	ADAM12	O43184	bmi	0.0402819	0.00451554	8.92072	9.35005e-18	4.90192e-15
OID30491	ADAM12	O43184	HRT.current	-0.0292846	0.0746338	-0.392377	0.694951	0.92076
OID30491	ADAM12	O43184	menopause_status.peri	-0.067095	0.111609	-0.601162	0.548011	0.864853
OID30491	ADAM12	O43184	menopause_status.post	-0.00193171	0.0684598	-0.0282167	0.977501	0.996476
OID30491	ADAM12	O43184	smoking.current	0.00364742	0.054462	0.0669719	0.946631	0.989637
OID20109	ADAM15	Q13444	age	0.0069007	0.00289418	2.38434	0.017484	0.15232
OID20109	ADAM15	Q13444	alcohol_gram_week	-0.00037366	0.000286942	-1.30221	0.193446	0.5998
OID20109	ADAM15	Q13444	birth_times	0.00342876	0.0165501	0.207174	0.835958	0.963425
OID20109	ADAM15	Q13444	bmi	0.00333488	0.003917	0.851385	0.394966	0.773597
OID20109	ADAM15	Q13444	HRT.current	-0.0551522	0.0652717	-0.844965	0.398537	0.776615
OID20109	ADAM15	Q13444	menopause_status.peri	-0.0169013	0.097377	-0.173566	0.862278	0.970729
OID20109	ADAM15	Q13444	menopause_status.post	-0.0163455	0.0594013	-0.275171	0.783299	0.949584
OID20109	ADAM15	Q13444	smoking.current	-0.014822	0.0473756	-0.312862	0.754517	0.94235
OID21001	ADAM22	Q9P0K1	age	0.0053161	0.00304038	1.7485	0.0810071	0.392056
OID21001	ADAM22	Q9P0K1	alcohol_gram_week	-0.000762248	0.000304838	-2.5005	0.0127287	0.122519
OID21001	ADAM22	Q9P0K1	birth_times	0.0254129	0.0171799	1.47922	0.139726	0.518877
OID21001	ADAM22	Q9P0K1	bmi	0.0147548	0.00409023	3.60732	0.00034126	0.00737948
OID21001	ADAM22	Q9P0K1	HRT.current	0.0389252	0.0669349	0.581537	0.561147	0.869363
OID21001	ADAM22	Q9P0K1	menopause_status.peri	-0.177201	0.101249	-1.75016	0.0807191	0.391514
OID21001	ADAM22	Q9P0K1	menopause_status.post	0.0238709	0.0628952	0.379535	0.704456	0.924663
OID21001	ADAM22	Q9P0K1	smoking.current	-0.116758	0.0500055	-2.3349	0.0199533	0.165812
OID20651	ADAM23	O75077	age	0.0113703	0.00278269	4.08609	5.10497e-05	0.00155002
OID20651	ADAM23	O75077	alcohol_gram_week	-0.000274947	0.000276061	-0.995965	0.319746	0.720807
OID20651	ADAM23	O75077	birth_times	-0.0015559	0.0157764	-0.0986215	0.921478	0.98361
OID20651	ADAM23	O75077	bmi	0.00343246	0.00377567	0.909099	0.363733	0.751578
OID20651	ADAM23	O75077	HRT.current	-0.0256294	0.0622712	-0.411578	0.680824	0.916301
OID20651	ADAM23	O75077	menopause_status.peri	-0.0683892	0.0941048	-0.726735	0.467727	0.821027
OID20651	ADAM23	O75077	menopause_status.post	-0.0879921	0.057091	-1.54126	0.123882	0.48947
OID20651	ADAM23	O75077	smoking.current	0.0109582	0.0457301	0.239628	0.810717	0.957157
OID21039	ADAM8	P78325	age	0.00514691	0.00246388	2.08894	0.0372157	0.248935
OID21039	ADAM8	P78325	alcohol_gram_week	-0.000717267	0.000244118	-2.9382	0.00345311	0.0465519
OID21039	ADAM8	P78325	birth_times	0.0194724	0.0139505	1.39583	0.163383	0.556773
OID21039	ADAM8	P78325	bmi	0.0169314	0.00334263	5.0653	5.73814e-07	3.29378e-05
OID21039	ADAM8	P78325	HRT.current	-0.080869	0.0550676	-1.46854	0.142583	0.523322
OID21039	ADAM8	P78325	menopause_status.peri	-0.0144909	0.0832155	-0.174137	0.861828	0.970605
OID21039	ADAM8	P78325	menopause_status.post	-0.0161128	0.0505664	-0.318646	0.750128	0.940723
OID21039	ADAM8	P78325	smoking.current	0.0793019	0.0404493	1.96053	0.050487	0.298928
OID31488	ADAM9	Q13443	age	0.00863721	0.00301863	2.8613	0.00439947	0.0568413
OID31488	ADAM9	Q13443	alcohol_gram_week	-0.00060686	0.000296419	-2.04731	0.0411608	0.264588
OID31488	ADAM9	Q13443	birth_times	0.0212887	0.0170093	1.25159	0.211316	0.622869
OID31488	ADAM9	Q13443	bmi	0.00977349	0.00406094	2.4067	0.0164662	0.146317
OID31488	ADAM9	Q13443	HRT.current	0.0428054	0.0682172	0.627487	0.530633	0.854793
OID31488	ADAM9	Q13443	menopause_status.peri	0.081315	0.100102	0.81232	0.417002	0.789601
OID31488	ADAM9	Q13443	menopause_status.post	0.0421045	0.0619656	0.679483	0.497153	0.836734
OID31488	ADAM9	Q13443	smoking.current	-0.00269993	0.0496782	-0.0543483	0.95668	0.992579
OID30528	ADAMTS1	Q9UHI8	age	0.0150117	0.00351934	4.26548	2.39637e-05	0.000809959
OID30528	ADAMTS1	Q9UHI8	alcohol_gram_week	-0.00013785	0.000349213	-0.394744	0.693204	0.920417
OID30528	ADAMTS1	Q9UHI8	birth_times	-0.00528182	0.0201522	-0.262096	0.793358	0.952829
OID30528	ADAMTS1	Q9UHI8	bmi	0.00664497	0.00476755	1.39379	0.164015	0.557476
OID30528	ADAMTS1	Q9UHI8	HRT.current	-0.0358952	0.0787991	-0.455528	0.648932	0.903968
OID30528	ADAMTS1	Q9UHI8	menopause_status.peri	-0.149567	0.117838	-1.26926	0.204953	0.613259
OID30528	ADAMTS1	Q9UHI8	menopause_status.post	0.0288921	0.0722805	0.399722	0.689536	0.91926
OID30528	ADAMTS1	Q9UHI8	smoking.current	-0.0310414	0.0575014	-0.539837	0.589556	0.882482
OID20249	ADAMTS13	Q76LX8	age	-0.00541496	0.00210749	-2.56939	0.0104748	0.106426
OID20249	ADAMTS13	Q76LX8	alcohol_gram_week	-0.000531729	0.000209076	-2.54323	0.0112815	0.11249
OID20249	ADAMTS13	Q76LX8	birth_times	0.00712619	0.0119484	0.596415	0.551166	0.865553
OID20249	ADAMTS13	Q76LX8	bmi	-0.00278703	0.00285952	-0.97465	0.330203	0.728774
OID20249	ADAMTS13	Q76LX8	HRT.current	-0.0748316	0.0471614	-1.58671	0.113206	0.467563
OID20249	ADAMTS13	Q76LX8	menopause_status.peri	0.041143	0.0712708	0.577277	0.564011	0.870726
OID20249	ADAMTS13	Q76LX8	menopause_status.post	0.0227936	0.0432382	0.527164	0.598312	0.886614
OID20249	ADAMTS13	Q76LX8	smoking.current	-0.0591888	0.034634	-1.70898	0.0880714	0.409288
OID21275	ADAMTS15	Q8TE58	age	-0.00461729	0.0058189	-0.793499	0.42788	0.797695
OID21275	ADAMTS15	Q8TE58	alcohol_gram_week	-0.00100607	0.000570927	-1.76218	0.0786769	0.386816
OID21275	ADAMTS15	Q8TE58	birth_times	-0.0274256	0.0331028	-0.828496	0.407802	0.783693
OID21275	ADAMTS15	Q8TE58	bmi	0.0630065	0.00769842	8.18435	2.49331e-15	7.63924e-13
OID21275	ADAMTS15	Q8TE58	HRT.current	-0.480714	0.127441	-3.77207	0.000182164	0.00443054
OID21275	ADAMTS15	Q8TE58	menopause_status.peri	-0.0613053	0.195668	-0.313312	0.75418	0.942081
OID21275	ADAMTS15	Q8TE58	menopause_status.post	0.255861	0.118767	2.15431	0.0317136	0.224884
OID21275	ADAMTS15	Q8TE58	smoking.current	0.183584	0.0938556	1.95603	0.0510424	0.300447
OID20089	ADAMTS16	Q8TE57	age	0.0117812	0.00264161	4.45986	1.01492e-05	0.000389967
OID20089	ADAMTS16	Q8TE57	alcohol_gram_week	-0.000408712	0.000261901	-1.56056	0.119264	0.479969
OID20089	ADAMTS16	Q8TE57	birth_times	-0.00833737	0.0151058	-0.551932	0.581243	0.87876
OID20089	ADAMTS16	Q8TE57	bmi	0.0052929	0.00357517	1.48046	0.139384	0.518424
OID20089	ADAMTS16	Q8TE57	HRT.current	0.0758477	0.0595755	1.27314	0.203565	0.611783
OID20089	ADAMTS16	Q8TE57	menopause_status.peri	-0.103792	0.088879	-1.16779	0.243452	0.655802
OID20089	ADAMTS16	Q8TE57	menopause_status.post	0.00630004	0.0542174	0.1162	0.907541	0.979829
OID20089	ADAMTS16	Q8TE57	smoking.current	-0.0143527	0.0432412	-0.331922	0.740088	0.938315
OID30471	ADAMTS4	O75173	age	0.0124701	0.00415465	3.00147	0.00282443	0.0401308
OID30471	ADAMTS4	O75173	alcohol_gram_week	-4.89285e-06	0.000412252	-0.0118686	0.990535	0.999295
OID30471	ADAMTS4	O75173	birth_times	0.0120011	0.02379	0.504459	0.614167	0.8927
OID30471	ADAMTS4	O75173	bmi	0.0193527	0.00562818	3.43854	0.00063494	0.0123695
OID30471	ADAMTS4	O75173	HRT.current	0.0904303	0.0930238	0.97212	0.331473	0.729932
OID30471	ADAMTS4	O75173	menopause_status.peri	0.181757	0.13911	1.30658	0.191971	0.597334
OID30471	ADAMTS4	O75173	menopause_status.post	-0.0233076	0.0853285	-0.273151	0.784852	0.950637
OID30471	ADAMTS4	O75173	smoking.current	0.0755106	0.0678815	1.11239	0.266519	0.677628
OID21502	ADAMTS8	Q9UP79	age	-0.00240374	0.00410464	-0.585615	0.558404	0.867786
OID21502	ADAMTS8	Q9UP79	alcohol_gram_week	-0.000480522	0.000414809	-1.15842	0.247258	0.65928
OID21502	ADAMTS8	Q9UP79	birth_times	-0.0407613	0.0231737	-1.75895	0.0792099	0.387771
OID21502	ADAMTS8	Q9UP79	bmi	-0.0177493	0.0054701	-3.24478	0.00125576	0.0212867
OID21502	ADAMTS8	Q9UP79	HRT.current	0.0553028	0.0910039	0.607697	0.54367	0.862892
OID21502	ADAMTS8	Q9UP79	menopause_status.peri	0.236466	0.144029	1.64179	0.101274	0.440158
OID21502	ADAMTS8	Q9UP79	menopause_status.post	0.291399	0.0839375	3.47162	0.000563097	0.0111981
OID21502	ADAMTS8	Q9UP79	smoking.current	-0.0553044	0.0663657	-0.833328	0.405066	0.781128
OID30370	ADAMTSL2	Q86TH1	age	0.0120427	0.00300968	4.00133	7.25003e-05	0.00208081
OID30370	ADAMTSL2	Q86TH1	alcohol_gram_week	-0.000656123	0.000298779	-2.19602	0.0285483	0.20923
OID30370	ADAMTSL2	Q86TH1	birth_times	0.00344429	0.0171258	0.201118	0.840688	0.964297
OID30370	ADAMTSL2	Q86TH1	bmi	0.0129487	0.00408108	3.17286	0.00160211	0.025696
OID30370	ADAMTSL2	Q86TH1	HRT.current	-0.167604	0.0673084	-2.4901	0.0130939	0.124863
OID30370	ADAMTSL2	Q86TH1	menopause_status.peri	-0.0956117	0.101765	-0.939531	0.347911	0.740773
OID30370	ADAMTSL2	Q86TH1	menopause_status.post	-0.0315869	0.0619163	-0.510154	0.610168	0.890214
OID30370	ADAMTSL2	Q86TH1	smoking.current	0.18254	0.0494322	3.69274	0.000246232	0.00562302
OID30275	ADAMTSL4	Q6UY14	age	0.00475883	0.00223679	2.12752	0.0338848	0.234157
OID30275	ADAMTSL4	Q6UY14	alcohol_gram_week	-6.69279e-05	0.000230056	-0.290921	0.771237	0.947401
OID30275	ADAMTSL4	Q6UY14	birth_times	0.00769664	0.0128382	0.599511	0.549114	0.86504
OID30275	ADAMTSL4	Q6UY14	bmi	0.0119874	0.00306807	3.90713	0.00010678	0.00287246
OID30275	ADAMTSL4	Q6UY14	HRT.current	-0.108945	0.0508387	-2.14294	0.0326187	0.228622
OID30275	ADAMTSL4	Q6UY14	menopause_status.peri	-0.249222	0.0768497	-3.24298	0.00126508	0.0214256
OID30275	ADAMTSL4	Q6UY14	menopause_status.post	-0.0276297	0.0460168	-0.600427	0.548505	0.86504
OID30275	ADAMTSL4	Q6UY14	smoking.current	0.0855324	0.0367783	2.32562	0.0204536	0.168665
OID30355	ADAMTSL5	Q6ZMM2	age	0.000890689	0.00309565	0.287722	0.773678	0.947793
OID30355	ADAMTSL5	Q6ZMM2	alcohol_gram_week	-0.000340007	0.000307108	-1.10712	0.26877	0.67959
OID30355	ADAMTSL5	Q6ZMM2	birth_times	-0.0250177	0.0175508	-1.42545	0.154648	0.543247
OID30355	ADAMTSL5	Q6ZMM2	bmi	-0.00279039	0.00420031	-0.66433	0.506783	0.841525
OID30355	ADAMTSL5	Q6ZMM2	HRT.current	0.176526	0.0692747	2.5482	0.0111242	0.111298
OID30355	ADAMTSL5	Q6ZMM2	menopause_status.peri	0.00861611	0.104689	0.0823024	0.934439	0.986746
OID30355	ADAMTSL5	Q6ZMM2	menopause_status.post	-0.190291	0.0635119	-2.99614	0.00286913	0.040605
OID30355	ADAMTSL5	Q6ZMM2	smoking.current	-0.112465	0.0508733	-2.21069	0.0275067	0.204326
OID21188	ADCYAP1R1	P41586	age	0.00175273	0.00330062	0.53103	0.595642	0.885288
OID21188	ADCYAP1R1	P41586	alcohol_gram_week	6.49128e-05	0.000326464	0.198836	0.842475	0.964786
OID21188	ADCYAP1R1	P41586	birth_times	-0.0136441	0.0186081	-0.733234	0.463772	0.818898
OID21188	ADCYAP1R1	P41586	bmi	0.00296805	0.00440052	0.674478	0.50033	0.837861
OID21188	ADCYAP1R1	P41586	HRT.current	-0.00192305	0.0720519	-0.0266898	0.978718	0.996931
OID21188	ADCYAP1R1	P41586	menopause_status.peri	-0.100519	0.10893	-0.922784	0.35658	0.746283
OID21188	ADCYAP1R1	P41586	menopause_status.post	-0.0696611	0.0675726	-1.03091	0.3031	0.708578
OID21188	ADCYAP1R1	P41586	smoking.current	0.0136426	0.0532893	0.256009	0.798053	0.954411
OID30655	ADD1	P35611	age	1.61833e-05	0.00509294	0.0031776	0.997466	0.999712
OID30655	ADD1	P35611	alcohol_gram_week	-9.7191e-05	0.000516914	-0.188022	0.850937	0.967298
OID30655	ADD1	P35611	birth_times	0.017962	0.0288893	0.621753	0.534393	0.857269
OID30655	ADD1	P35611	bmi	0.00377191	0.0069387	0.543604	0.586961	0.881618
OID30655	ADD1	P35611	HRT.current	0.0864807	0.115928	0.745985	0.456034	0.814981
OID30655	ADD1	P35611	menopause_status.peri	-0.455953	0.170775	-2.6699	0.00783891	0.0861647
OID30655	ADD1	P35611	menopause_status.post	0.0470914	0.10481	0.449304	0.65341	0.905798
OID30655	ADD1	P35611	smoking.current	0.054437	0.0839792	0.64822	0.517146	0.847551
OID20974	ADGRB3	O60242	age	0.00593379	0.00276401	2.1468	0.0323011	0.227344
OID20974	ADGRB3	O60242	alcohol_gram_week	-0.000240407	0.000277128	-0.867493	0.386098	0.767641
OID20974	ADGRB3	O60242	birth_times	0.00458612	0.0156183	0.293638	0.769159	0.94647
OID20974	ADGRB3	O60242	bmi	-0.00714999	0.00371843	-1.92286	0.0550799	0.315706
OID20974	ADGRB3	O60242	HRT.current	-0.000610411	0.0608505	-0.0100313	0.992	0.999295
OID20974	ADGRB3	O60242	menopause_status.peri	0.22027	0.0920451	2.39307	0.0170851	0.150064
OID20974	ADGRB3	O60242	menopause_status.post	0.0531043	0.057178	0.928755	0.353475	0.744405
OID20974	ADGRB3	O60242	smoking.current	0.0417902	0.0454599	0.919275	0.358406	0.747481
OID30588	ADGRD1	Q6QNK2	age	0.00974492	0.0029603	3.29187	0.00106693	0.0187423
OID30588	ADGRD1	Q6QNK2	alcohol_gram_week	0.000742575	0.000300459	2.47147	0.013794	0.129593
OID30588	ADGRD1	Q6QNK2	birth_times	-0.0183577	0.0167921	-1.09324	0.274825	0.68497
OID30588	ADGRD1	Q6QNK2	bmi	0.0127664	0.00403316	3.16535	0.00164514	0.0261995
OID30588	ADGRD1	Q6QNK2	HRT.current	0.0668998	0.0673839	0.992815	0.321289	0.721661
OID30588	ADGRD1	Q6QNK2	menopause_status.peri	0.0506159	0.0992641	0.509911	0.610343	0.890214
OID30588	ADGRD1	Q6QNK2	menopause_status.post	0.154971	0.0609212	2.54379	0.011271	0.112433
OID30588	ADGRD1	Q6QNK2	smoking.current	0.0274501	0.0488134	0.562347	0.574136	0.875731
OID31483	ADGRE1	Q14246	age	0.00938982	0.00526877	1.78217	0.075341	0.377778
OID31483	ADGRE1	Q14246	alcohol_gram_week	-0.00147528	0.000517374	-2.85149	0.00453522	0.0578714
OID31483	ADGRE1	Q14246	birth_times	0.0554266	0.0296883	1.86696	0.0625048	0.34002
OID31483	ADGRE1	Q14246	bmi	0.0141354	0.00708803	1.99426	0.0466776	0.284994
OID31483	ADGRE1	Q14246	HRT.current	-0.175825	0.119067	-1.47668	0.140403	0.52003
OID31483	ADGRE1	Q14246	menopause_status.peri	0.192615	0.17472	1.10242	0.270819	0.681167
OID31483	ADGRE1	Q14246	menopause_status.post	0.0603919	0.108156	0.558379	0.57684	0.876979
OID31483	ADGRE1	Q14246	smoking.current	-0.0443735	0.0867091	-0.511752	0.609055	0.889839
OID20755	ADGRE2	Q9UHX3	age	0.00924172	0.00247336	3.73651	0.000208064	0.00491849
OID20755	ADGRE2	Q9UHX3	alcohol_gram_week	-0.000759073	0.000243521	-3.11707	0.00193148	0.0295892
OID20755	ADGRE2	Q9UHX3	birth_times	0.0210821	0.013916	1.51495	0.130415	0.502211
OID20755	ADGRE2	Q9UHX3	bmi	0.0066967	0.00333232	2.00962	0.0450068	0.279421
OID20755	ADGRE2	Q9UHX3	HRT.current	-0.153885	0.0549367	-2.80113	0.00528925	0.0645212
OID20755	ADGRE2	Q9UHX3	menopause_status.peri	0.017493	0.0830199	0.210709	0.8332	0.962816
OID20755	ADGRE2	Q9UHX3	menopause_status.post	0.0577343	0.050626	1.14041	0.254661	0.665998
OID20755	ADGRE2	Q9UHX3	smoking.current	-0.0884088	0.040354	-2.19083	0.028924	0.211262
OID20260	ADGRE5	P48960	age	0.00832976	0.00271166	3.07183	0.0022427	0.0333186
OID20260	ADGRE5	P48960	alcohol_gram_week	-0.000975592	0.000269014	-3.62655	0.00031652	0.00694769
OID20260	ADGRE5	P48960	birth_times	0.0207874	0.0153737	1.35214	0.176939	0.573792
OID20260	ADGRE5	P48960	bmi	0.0112815	0.00367929	3.06622	0.00228444	0.0337844
OID20260	ADGRE5	P48960	HRT.current	-0.196704	0.0606816	-3.24158	0.00126751	0.0214458
OID20260	ADGRE5	P48960	menopause_status.peri	0.0224359	0.0917026	0.24466	0.80682	0.957157
OID20260	ADGRE5	P48960	menopause_status.post	0.0873763	0.0556337	1.57057	0.116912	0.475715
OID20260	ADGRE5	P48960	smoking.current	-0.118903	0.0445628	-2.66822	0.00787147	0.0862935
OID30349	ADGRF5	Q8IZF2	age	0.00127509	0.00237662	0.536512	0.591842	0.88327
OID30349	ADGRF5	Q8IZF2	alcohol_gram_week	-0.00020037	0.000235776	-0.849835	0.395821	0.774121
OID30349	ADGRF5	Q8IZF2	birth_times	-0.0231332	0.0134742	-1.71685	0.0866218	0.405794
OID30349	ADGRF5	Q8IZF2	bmi	0.00637484	0.0032247	1.97688	0.0486008	0.292398
OID30349	ADGRF5	Q8IZF2	HRT.current	0.0248509	0.0531841	0.467262	0.640515	0.901286
OID30349	ADGRF5	Q8IZF2	menopause_status.peri	-0.0301499	0.0803724	-0.375127	0.707724	0.925565
OID30349	ADGRF5	Q8IZF2	menopause_status.post	0.0592312	0.0487599	1.21475	0.22503	0.63701
OID30349	ADGRF5	Q8IZF2	smoking.current	0.00182635	0.0390569	0.0467613	0.962722	0.994072
OID21294	ADGRG1	Q9Y653	age	0.0137228	0.0052458	2.61596	0.00917866	0.0968548
OID21294	ADGRG1	Q9Y653	alcohol_gram_week	-0.000649554	0.000514697	-1.26201	0.207559	0.617494
OID21294	ADGRG1	Q9Y653	birth_times	0.069321	0.0298426	2.32289	0.0206031	0.169362
OID21294	ADGRG1	Q9Y653	bmi	0.0181784	0.00694021	2.61928	0.00909101	0.0962203
[truncated: 23,148 more rows]
